# Supplementary material for: Health Canada’s use of expedited review pathways and therapeutic innovation, 1995–2016: cross-sectional analysis
Source: PubMed Central journal article supplement — BMJ Open. 2018 Aug 30;8(8):e023605. doi: 10.1136/bmjopen-2018-023605 (PMC6119438; doi:10.1136/bmjopen-2018-023605), 2018-08-30
Supplement: bmjopen-2018-023605.draft_revisions.pdf [file bmjopen-2018-023605.draft_revisions.pdf]

# BMJ Open

BMJ Open is committed to open peer review. As part of this commitment we make the peer review history of every article we publish publicly available.

When an article is published we post the peer reviewers' comments and the authors' responses online. We also post the versions of the paper that were used during peer review. These are the versions that the peer review comments apply to.

The versions of the paper that follow are the versions that were submitted during the peer review process. They are not the versions of record or the final published versions. They should not be cited or distributed as the published version of this manuscript.

BMJ Open is an open access journal and the full, final, typeset and author-corrected version of record of the manuscript is available on our site with no access controls, subscription charges or pay-per-view fees (<http://bmjopen.bmj.com>).

If you have any questions on BMJ Open's open peer review process please email [info.bmjopen@bmj.com](mailto:info.bmjopen@bmj.com)

# BMJ Open

## Health Canada's use of accelerated review pathways and therapeutic innovation, 1995-2016: a cohort study

|                               |                                                                                                                                               |
|-------------------------------|-----------------------------------------------------------------------------------------------------------------------------------------------|
| Journal:                      | <i>BMJ Open</i>                                                                                                                               |
| Manuscript ID                 | bmjopen-2018-023605                                                                                                                           |
| Article Type:                 | Research                                                                                                                                      |
| Date Submitted by the Author: | 14-Apr-2018                                                                                                                                   |
| Complete List of Authors:     | Lexchin, Joel; York University, School of Health Policy & Management                                                                          |
| Keywords:                     | Health policy < HEALTH SERVICES ADMINISTRATION & MANAGEMENT, accelerated approvals, Health Canada, therapeutic evaluation, therapeutic groups |
|                               |                                                                                                                                               |

SCHOLARONE™  
Manuscripts

view only

1  
2  
3 1 **Health Canada's use of accelerated review pathways and therapeutic innovation, 1995-**  
4  
5 2 **2016: a cohort study**

6  
7  
8 3 Joel Lexchin MSc, MD<sup>1,2,3</sup>

9  
10 4 <sup>1</sup>Professor Emeritus

11  
12 5 School of Health Policy and Management

13  
14 6 York University

15  
16 7 <sup>2</sup>Emergency Physician

17  
18 8 University Health Network

19  
20 9 <sup>3</sup>Associate Professor

21  
22 10 Faculty of Medicine

23  
24 11 University of Toronto

25  
26 12

27  
28 13 Correspondence:

29  
30 14 Joel Lexchin MD

31  
32 15 School of Health Policy and Management

33  
34 16 York University

35  
36 17 4700 Keele St.

37  
38 18 Toronto, ON M3J 1P3

39  
40 19 Tel: 416-964-7186

41  
42 20 Email: [jlexchin@yorku.ca](mailto:jlexchin@yorku.ca)

43  
44 21 ORCID ID: 0000-0001-5120-8029

45  
46 22 **Key words:**

47  
48 23 accelerated approvals, Health Canada, health policy, therapeutic evaluation, therapeutic

49  
50 24 group

51  
52 25 **Word count:**

1  
2  
3 26 2790  
4  
5

6 27 **Structured summary**  
7

8 28 **Objectives**  
9

10  
11 29 This study examines the use of accelerated approval pathways by Health Canada over the  
12  
13 30 period 1995 to 2016 inclusive and the relationship between the use of these pathways and the  
14  
15 31 therapeutic gain offered by new products.  
16  
17

18  
19 32 **Design**  
20

21  
22 33 Cohort study.  
23  
24

25 34 **Data sources**  
26

27  
28 35 Therapeutic Products Directorate, Biologics and Genetic Therapies Directorate, Notice of  
29  
30 36 Compliance database, Notice of Compliance with conditions web site, Patented Medicine  
31  
32 37 Prices Review Board, La revue Prescrire, World Health Organization (WHO) Anatomical  
33  
34 38 Therapeutic Chemical (ATC) classification system.  
35  
36  
37

38 39 **Interventions**  
39

40  
41 40 None  
42  
43  
44

45 41 **Primary and secondary outcomes**  
46

47  
48 42 Percent of new drugs evaluated by Health Canada that went through an accelerated pathway  
49  
50 43 between 1995 and 2016 inclusive. Kappa values comparing the review status to assessments  
51  
52 44 of therapeutic value for individual drugs.  
53  
54

55 45 **Results**  
56  
57  
58  
59  
60

1  
2  
3 46 438 (70.3%) drugs went through the standard pathway, 185 (29.7%) an accelerated pathway.  
4  
5 47 Therapeutic evaluations were available for 509 drugs. Health Canada used an accelerated  
6  
7 48 approval pathway for 159 of the 509 drugs whereas only 55 were judged to be therapeutically  
8  
9 49 innovative. The Kappa value for the entire period for all 509 drugs was 0.276 (95% CI 0.194,  
10  
11 50 0.359) or fair.

## 14 51 **Conclusion**

16  
17  
18 52 Health Canada's use of accelerated approvals was stable over the entire time period. Its  
19  
20 53 ability to predict which drugs will offer a major therapeutic gain is relatively poor. The  
21  
22 54 findings in this study should provoke a discussion about whether Health Canada should  
23  
24 55 continue to use these pathways and if so how their use can be improved.  
25  
26  
27 56

1  
2  
3 57 **Article Summary**  
4

5 58 *Strengths and limitations of this study*  
6

- 7 59 • Examination of the use of accelerated approval pathways by Health Canada over an  
8 extended period of time.  
9  
10 60  
11 61 • Comparison of use of accelerated approval pathways to independent assessment of  
12 therapeutic evaluation.  
13  
14 62  
15 63 • Analysis of approvals and therapeutic value of therapeutic subgroups.  
16  
17  
18 64 • Twenty percent of new drugs approved did not have therapeutic evaluations.  
19

20 65  
21  
22  
23  
24  
25  
26  
27  
28  
29  
30  
31  
32  
33  
34  
35  
36  
37  
38  
39  
40  
41  
42  
43  
44  
45  
46  
47  
48  
49  
50  
51  
52  
53  
54  
55  
56  
57  
58  
59  
60

## 66 **Introduction**

67 In order to get a new active substance (NAS - a molecule never marketed before in Canada in  
68 any form) approved for marketing in Canada, companies typically file a New Drug  
69 Submission (NDS) which includes preclinical and clinical scientific information about the  
70 product's safety, efficacy and quality and information about its claimed therapeutic value,  
71 conditions for use and side effects (1). Health Canada then has a 300-day period to evaluate  
72 this information and make a decision about whether to allow the product to be sold, i.e.,  
73 whether to issue a Notice of Compliance (NOC).

74

75 In an effort to ensure that promising therapies for serious, life-threatening or debilitating  
76 illnesses can reach Canadians in a timely manner, Health Canada has developed two other  
77 pathways for approving NAS. These are described in detail elsewhere (2), but briefly, the  
78 first of these is a priority review that involves the company submitting a complete NDS but  
79 with a review period of 180 days (3). The second is the Notice of Compliance with conditions  
80 (NOC/c) (4) whereby Health Canada will give a conditional approval based on limited  
81 evidence – Phase II clinical trials or trials with only surrogate markers. In return for NOC/c  
82 status, companies commit to further studies that definitively establish efficacy and submit the  
83 results of these to Health Canada. A failure to complete these studies or negative results from  
84 them could lead to the marketing authorization being cancelled.

85

86 Lexchin has examined how closely Health Canada's use of the two pathways (priority review  
87 and NOC/c, hereafter collectively termed accelerated review pathways) corresponds to  
88 independent assessments of the therapeutic innovation of drugs at the level of individual  
89 drugs. For the period 1997-2012, the Kappa value was 0.334 (95% CI 0.220, 0.447) or fair  
90 (5).

1  
2  
3 91  
4  
5 92 This current study is a further and more detailed look at how Health Canada uses its  
6  
7 93 accelerated review pathways, by extending previous work in a number of ways. First it  
8  
9 94 covers a wider time period – 1995 to 2016, inclusive. Second, it looks at the use of both of  
10  
11 95 the accelerated review pathways over this entire time period for the entire sample of drugs as  
12  
13 96 well as subgroups – small molecule drugs, biologics, and therapies for serious diseases.  
14  
15 97 Third, it calculates the Kappa and positive and negative predictive values for the entire  
16  
17 98 sample of drugs as well as the subgroups listed above. These subgroups were chosen because  
18  
19 99 small molecules and biologics have fundamentally different characteristics and these may  
20  
21 100 influence a decision to use an accelerated review pathway and how accurately Health Canada  
22  
23 101 can predict their therapeutic value. Similarly, when the treatment is for serious medical  
24  
25 102 conditions, Health Canada may be more willing to use an accelerated review pathway and  
26  
27 103 may be more likely to believe that the new product will provide a significant therapeutic  
28  
29 104 benefit.  
30  
31  
32  
33  
34

## 35 106 **Methods**

### 36 107 *Data sources*

37  
38  
39 108 All NAS approved from 1995 to 2016 inclusive were documented using the annual reports  
40  
41 109 from the Therapeutic Products and the Biologics and Genetic Therapies Directorates that are  
42  
43 110 in charge of reviewing applications for new small molecule drugs and biologics and  
44  
45 111 vaccines, respectively. (Reports are available by directly contacting the directorates at  
46  
47 112 <[publications@hc-sc.gc.ca](mailto:publications@hc-sc.gc.ca)>.) 1995 was the starting date as there are no annual reports from  
48  
49 113 Health Canada prior to that year. Generic and brand names along with the specific approval  
50  
51 114 pathway – standard, priority, NOC/c (only from 1998 onwards) – and whether the product  
52  
53  
54  
55  
56  
57  
58  
59  
60



1  
2  
3 115 was a small molecule drug or biologic (information available only from 2000 onwards) were  
4  
5 116 extracted from the annual reports.

6  
7 117

8  
9 118 Not all of the drugs with a NOC/c are documented in the annual reports and they were  
10  
11 119 supplemented using four additional sources: articles by Lexchin (6) and Law (7), the Notice  
12  
13 120 of Compliance database (<http://webprod5.hc-sc.gc.ca/noc-ac/index-eng.jsp>) and the Notice  
14  
15 121 of Compliance with conditions web site ([http://www.hc-sc.gc.ca/dhp-](http://www.hc-sc.gc.ca/dhp-mps/prodpharma/notices-avis/conditions/index-eng.php)  
16  
17 122 [mps/prodpharma/notices-avis/conditions/index-eng.php](http://www.hc-sc.gc.ca/dhp-mps/prodpharma/notices-avis/conditions/index-eng.php)). Only drugs approved for the first  
18  
19 123 time under a NOC/c were considered. Drugs can receive both a priority and NOC/c review  
20  
21 124 and in this case they were only counted as receiving a priority review.  
22  
23 125

#### 24 126 *Assessment of therapeutic innovation*

25  
26  
27 127 The therapeutic value of drugs was assessed using the ratings from the annual reports of the  
28  
29 128 Canadian Patented Medicine Prices Review Board (PMPRB) <[http://www.pmprb-](http://www.pmprb-cepmb.gc.ca/english/View.asp?x=91)  
30  
31 129 [cepmb.gc.ca/english/View.asp?x=91](http://www.pmprb-cepmb.gc.ca/english/View.asp?x=91)> and the French drug bulletin La revue Prescrire (8).

32  
33 130 The processes that these two organizations use in arriving at their decisions about  
34  
35 131 therapeutically innovation have been previously described (5). For the purpose of this study,  
36  
37 132 products that the PMPRB deemed breakthrough and substantial improvement were termed  
38  
39 133 “innovative” and products in other categories were termed “not innovative” (category 3 =  
40  
41 134 moderate, little or no improvement over existing medicines prior to 2010; slight or no  
42  
43 135 improvement, moderate improvement – primary and moderate improvement – secondary  
44  
45 136 from 2010 onward). Prescrire uses seven categories to rate therapeutic innovation. The first  
46  
47 137 two, bravo (major therapeutic innovation in an area where previously no treatment was  
48  
49 138 available); a real advance (important therapeutic innovation but has limitations) were defined  
50  
51 139 as a significant therapeutic innovation and the other Prescrire categories (except judgment  
52  
53  
54  
55  
56  
57  
58  
59  
60

140 reserved) were defined as no therapeutic advance.

141

142 If a drug was judged innovative by either the PMPRB and/or Prescrire, it was rated as inno-

143 vative. If both organizations evaluated the drug and the ratings were discordant, i.e., one said it

144 was not innovative and one said it was, the drug was still considered innovative. Table 1 shows

145 that there is substantial agreement among the definitions used by Health Canada, the PMPRB

146 and Prescrire in assessing therapeutic innovation. Ratings were current for PMPRB as of

147 December 31, 2016 (the annual report for 2017 was not available at the time of writing) and for

148 Prescrire as of February 20, 2018.

149 **Table 1: Criteria used by Health Canada in determination of priority review or Notice**  
 150 **of Compliance with conditions pathway and by Human Drug Advisory Panel and**  
 151 **Prescrire in determining innovation status**

152

| <b>Health Canada – criteria for priority review and NOC/c* pathway</b>                                                                                                                                                                                                                                        | <b>Human Drug Advisory Panel of Patented Medicine Prices Review Board – criteria for breakthrough and substantial improvement</b> | <b>Prescrire International – criteria for bravo and a real advance</b>                      |
|---------------------------------------------------------------------------------------------------------------------------------------------------------------------------------------------------------------------------------------------------------------------------------------------------------------|-----------------------------------------------------------------------------------------------------------------------------------|---------------------------------------------------------------------------------------------|
| Priority review: A serious, life-threatening or severely debilitating illness or condition for which there is substantial evidence of clinical effectiveness that the drug provides: effective treatment, prevention or diagnosis of a disease or condition for which no drug is presently marketed in Canada | Breakthrough = first drug product to treat effectively a particular illness                                                       | Bravo = major therapeutic innovation in an area where previously no treatment was available |
| Priority review: A serious, life-threatening or severely debilitating illness or condition for which there is substantial evidence of clinical effectiveness that the drug provides: significant increase in efficacy and/or significant decrease in risk such that                                           | Substantial improvement = provides a substantial improvement over existing drug products                                          | A real advance = product is an important therapeutic innovation but has certain limitations |

|                                                                                                                                                                                                                                                         |  |  |
|---------------------------------------------------------------------------------------------------------------------------------------------------------------------------------------------------------------------------------------------------------|--|--|
| <p>the overall benefit/risk profile is improved over existing therapies</p> <p>NOC/c pathway: Provides patients suffering from serious, life threatening or severely debilitating diseases or conditions with earlier access to promising new drugs</p> |  |  |
|---------------------------------------------------------------------------------------------------------------------------------------------------------------------------------------------------------------------------------------------------------|--|--|

153

154 Adapted from: (9)

155 \*Notice of Compliance with conditions

156

157 *Data analysis*

158 The number and percent of drugs approved through the standard, priority and NOC/c

159 pathways were calculated for each year and for the 22-year period.

160

161 Kappa values were used to compare the review status from Health Canada to the assessments

162 for the same drug from the PMPRB/Prescrire for each year and for the 22-year period. Owing

163 to the small number of drugs approved through the NOC/c pathway, numbers from the two

164 accelerated review pathways were combined. Kappa scores measure whether there is more or

165 less agreement between different evaluations than would be expected by chance. Levels of

166 agreement were graded in accordance with the recommendations of Landis and Koch (10).

167

168 *Subgroup analyses*

169 The number and percent of small molecule drugs and biologics approved through the

170 standard, priority and NOC/c pathways were calculate and compared using the Chi-square

171 statistic. Similarly, the Kappa values were calculated separately for small molecule drugs and

172 biologics.

173

1  
2  
3 174 All drugs were categorized using the second level of the World Health Organization (WHO)  
4  
5 175 Anatomical Therapeutic Chemical (ATC) classification system (11). Drugs in three therapeutic  
6  
7 176 groups – antineoplastic agents, antivirals for systemic use and immunosuppressants – were  
8  
9 177 chosen for subgroup analyses because they are primarily used for serious life-threatening  
10  
11 178 diseases and because there are sufficient numbers in each group to allow for statistical analyses.  
12  
13 179 The number and percent of each subgroup that received an accelerated review was calculated  
14  
15 180 as were the Kappa values on a drug-by-drug basis and for drugs in the “all other therapeutic  
16  
17 181 groups”. Distribution of approval pathways in the subgroups individually and for the three  
18  
19 182 subgroups combined versus all other therapeutic groups was compared using the Chi-square  
20  
21 183 statistic. Calculations were done using Excel 2016 for Macintosh (Microsoft) and Prism 7.0  
22  
23 184 (GraphPad Software).

24  
25 185

#### 26 27 186 *Patient and public involvement*

28  
29  
30 187 No patients were involved in any aspect of this study.

31  
32 188

#### 33 34 189 *Ethics*

35  
36 190 No patients were involved in this study and only publicly available data was gathered.

37  
38 191 Therefore, ethics approval was not required.

39  
40  
41 192

## 42 43 193 **Results**

### 44 45 194 *Review status*

46  
47 195 From January 1, 1995 to December 31, 2016 Health Canada approved a total of 623 NAS. Of  
48  
49 196 these, 438 (70.3%) went through the standard pathway, 152 (24.4%) the priority pathway and  
50  
51 197 33 (5.3%) received a NOC/c. Almost 30 percent (29.7%) went through the accelerated  
52  
53 198 review pathways over the entire period, varying from a low of 9.1% in 2010 to a high of  
54  
55 199 47.8% in 2006 (Table 2). (Health Canada used both a priority and NOC/c approval for 11

200 drugs, data not shown.) Figure 1 shows that there is no trend to using accelerated review  
 201 pathways more liberally or more conservatively over the time period. (Supplementary Tables  
 202 1 & 2, drugs with and without therapeutic evaluations, respectively, give all of the data  
 203 extracted for the 623 drugs in question.)

204 **Figure 1: Percent of drugs approved through different pathways**

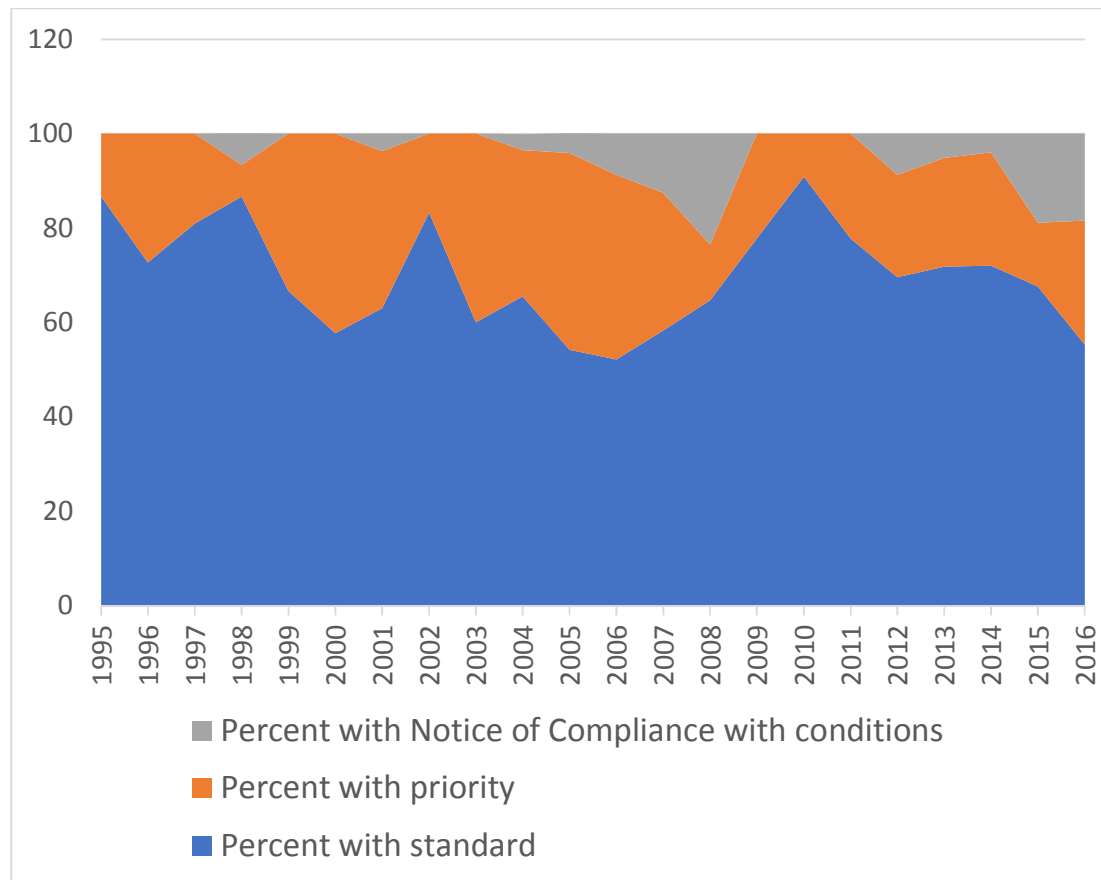

205

206

207 **Table 2: Review status of new active substances approved 1995-2016**

208

| Year | Number of new active substances approved | Number (%) with standard review | Number (%) with priority review | Number (%) with NOC/c* review | Number (%) with any accelerated pathway review |
|------|------------------------------------------|---------------------------------|---------------------------------|-------------------------------|------------------------------------------------|
| 1995 | 30                                       | 26 (86.7)                       | 4 (13.3)                        | --                            | 4 (13.3)                                       |
| 1996 | 33                                       | 24 (72.7)                       | 9 (27.3)                        | --                            | 9 (27.3)                                       |
| 1997 | 42                                       | 34 (81.0)                       | 8 (19.0)                        | --                            | 8 (19.0)                                       |
| 1998 | 30                                       | 26 (86.7)                       | 2 (6.7)                         | 2 (6.7)                       | 4 (13.3)                                       |

|              |     |               |               |          |            |
|--------------|-----|---------------|---------------|----------|------------|
| <b>1999</b>  | 36  | 24 (66.7)     | 12<br>(33.3)  | 0 (0)    | 12 (33.3)  |
| <b>2000</b>  | 26  | 15 (57.7)     | 11<br>(42.3)  | 0 (0)    | 11 (42.3)  |
| <b>2001</b>  | 27  | 17 (63.0)     | 9 (33.3)      | 1 (3.7)  | 10 (37.0)  |
| <b>2002</b>  | 24  | 20 (83.3)     | 4 (16.7)      | 0 (0)    | 4 (16.7)   |
| <b>2003</b>  | 20  | 12 (60.0)     | 8 (40.0)      | 0 (0)    | 8 (40.0)   |
| <b>2004</b>  | 29  | 19 (65.5)     | 9 (31.0)      | 1 (3.4)  | 10 (34.5)  |
| <b>2005</b>  | 24  | 13 (54.2)     | 10<br>(41.7)  | 1 (4.2)  | 11 (45.8)  |
| <b>2006</b>  | 23  | 12 (52.2)     | 9 (39.1)      | 2 (8.7)  | 11 (47.8)  |
| <b>2007</b>  | 24  | 14 (58.3)     | 7 (29.2)      | 3 (12.5) | 10 (41.7)  |
| <b>2008</b>  | 17  | 11 (64.7)     | 2 (11.8)      | 4 (23.5) | 6 (35.3)   |
| <b>2009</b>  | 27  | 21 (77.8)     | 6 (22.2)      | 0 (0)    | 6 (22.2)   |
| <b>2010</b>  | 22  | 20 (90.9)     | 2 (9.1)       | 0 (0)    | 2 (9.1)    |
| <b>2011</b>  | 27  | 21 (77.8)     | 6 (22.2)      | 0 (0)    | 6 (22.2)   |
| <b>2012</b>  | 23  | 16 (69.6)     | 5 (21.7)      | 2 (8.7)  | 7 (30.4)   |
| <b>2013</b>  | 39  | 28 (71.8)     | 9 (23.1)      | 2 (5.1)  | 11 (28.2)  |
| <b>2014</b>  | 25  | 18 (72.0)     | 6 (24.0)      | 1 (4.0)  | 7 (28.0)   |
| <b>2015</b>  | 37  | 25 (67.6)     | 5 (13.5)      | 7 (18.9) | 12 (32.4)  |
| <b>2016</b>  | 38  | 21 (55.3)     | 10<br>(26.3)  | 7 (18.4) | 17 (44.7)  |
| <b>Total</b> | 623 | 438<br>(70.3) | 152<br>(24.4) | 33 (5.3) | 185 (29.7) |

209

210 \*Notice of Compliance with conditions

211 †Patented Medicine Prices Review Board

212

213 There were 126 biologics approved versus 323 small molecules (data only available from  
 214 2000 onward). There was no difference in the distribution of the approval pathways ( $p =$   
 215 0.4867) (Table 3). There were 81 approvals for antineoplastic agents, 47 for antivirals for  
 216 systemic use, 36 for immunosuppressants and 365 for drugs in the “all other therapeutic  
 217 groups” ( $n = 67$ ) (Supplementary Table 1). The distribution of approval pathways was  
 218 significantly different for the three subgroups ( $p = 0.0018$ ) and for the three subgroups  
 219 combined versus “all other therapeutic groups” ( $p < 0.00001$ ) (Table 3).

220 **Table 3: Subgroup comparison of review pathways**

221

| Subgroup | Standard | Priority | Notice of compliance with conditions | Total |
|----------|----------|----------|--------------------------------------|-------|
|          |          |          |                                      |       |

|                              |     |    |    |     |
|------------------------------|-----|----|----|-----|
| Small molecules              | 129 | 72 | 22 | 323 |
| Biologics                    | 73  | 45 | 8  | 126 |
| Antineoplastic agents        | 34  | 26 | 21 | 81  |
| Antivirals for systemic use  | 16  | 26 | 5  | 47  |
| Immunosuppressants           | 22  | 13 | 1  | 36  |
| All other therapeutic groups | 365 | 89 | 5  | 459 |

222

223 Small molecules vs. biologics: chi-square = 1.4402 (p = 0.4867)

224 Antineoplastics vs. antivirals vs. immunosuppressants: chi-square = 17.1978 (p = 0.0018)

225 Antineoplastics + antivirals + immunosuppressants vs. all other therapeutic groups: chi-square = 97.4874 (p &lt; 0.00001)

226

227

228 *Therapeutic value*

229 Out of the 623 NAS, 509 (81.7%) were evaluated for their therapeutic innovation either by  
 230 the PMPRB and/or La revue Prescrire. Health Canada used an accelerated review pathway  
 231 for 159 of the 509 drugs whereas only 55 were judged to be therapeutically innovative by one  
 232 or both of the independent reviews (Table 4). The Kappa value for the entire period for all  
 233 509 drugs was 0.276 (95% CI 0.194, 0.359) or fair. Figure 2 presents the Kappa values for  
 234 each year which generally ranged from 0 (poor) to 0.4 (fair).

235 **Figure 2: Agreement between review status and therapeutic innovation (Kappa value)**

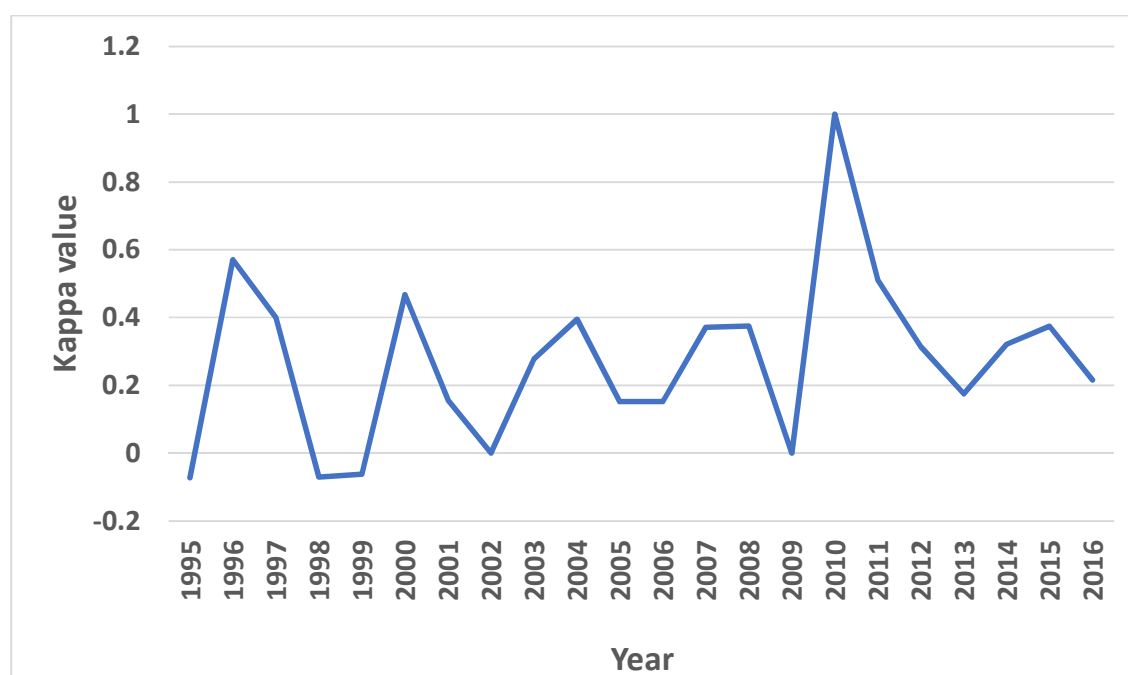

236

237

238 **Table 4: Number of new active substances with an accelerated review and**  
 239 **therapeutically innovative rating**

240

| Year | Number (%) of NAS* with a therapeutic assessment from Patented Medicine Prices Review Board and/or La revue Prescrire | Number of NAS with an accelerated review | Number of NAS rated as therapeutic innovation by either Patented Medicine Prices Review Board and/or La revue Prescrire |
|------|-----------------------------------------------------------------------------------------------------------------------|------------------------------------------|-------------------------------------------------------------------------------------------------------------------------|
| 1995 | 22 (73.3)                                                                                                             | 3                                        | 1                                                                                                                       |
| 1996 | 20 (60.6)                                                                                                             | 5                                        | 4                                                                                                                       |
| 1997 | 24 (57.1)                                                                                                             | 4                                        | 4                                                                                                                       |
| 1998 | 24 (80.0)                                                                                                             | 4                                        | 1                                                                                                                       |
| 1999 | 31 (86.1)                                                                                                             | 10                                       | 1                                                                                                                       |
| 2000 | 20 (76.9)                                                                                                             | 9                                        | 4                                                                                                                       |
| 2001 | 23 (85.2)                                                                                                             | 8                                        | 1                                                                                                                       |
| 2002 | 20 (83.3)                                                                                                             | 4                                        | 0                                                                                                                       |
| 2003 | 19 (95.0)                                                                                                             | 8                                        | 2                                                                                                                       |
| 2004 | 26 (89.7)                                                                                                             | 9                                        | 3                                                                                                                       |
| 2005 | 21 (87.5)                                                                                                             | 9                                        | 3                                                                                                                       |
| 2006 | 21 (91.3)                                                                                                             | 9                                        | 3                                                                                                                       |
| 2007 | 22 (91.7)                                                                                                             | 9                                        | 3                                                                                                                       |
| 2008 | 15 (88.2)                                                                                                             | 6                                        | 2                                                                                                                       |
| 2009 | 26 (96.3)                                                                                                             | 7                                        | 0                                                                                                                       |
| 2010 | 19 (86.4)                                                                                                             | 2                                        | 2                                                                                                                       |
| 2011 | 23 (85.3)                                                                                                             | 5                                        | 2                                                                                                                       |



|           |            |     |    |
|-----------|------------|-----|----|
| 2012      | 21 (91.3)  | 6   | 3  |
| 2013      | 36 (92.3)  | 11  | 6  |
| 2014      | 22 (88.0)  | 6   | 3  |
| 2015      | 30 (81.1)  | 12  | 4  |
| 2016      | 24 (63.2)  | 13  | 3  |
| 1995-2016 | 509 (81.7) | 159 | 55 |

241

242 \*New active substance

243 †Number of drugs rated as innovative as a percent of all drugs given an accelerated approval  
244 review by Health Canada245 ‡Number of drugs rated as not therapeutically innovative as a percent of all drugs given a  
246 standard review by Health Canada

247

248 There were 286 and 99 small molecule drugs and biologics, respectively, with therapeutic  
249 ratings. The Kappa values were 0.313 (95% CI 0.205, 0.420) (fair) and 0.233 (95% CI 0.061,  
250 0.405) (fair), respectively. The overlapping 95% CIs indicate no difference in the Kappa  
251 values between the two groups (Table 5).

252 **Table 5: Subgroup analyses: Kappa values**

253

| Subgroup                     | Number (%) | Kappa value (95% CI) |
|------------------------------|------------|----------------------|
| Small molecule drugs         | 286        | 0.313 (0.205, 0.420) |
| Biologics                    | 99         | 0.233 (0.061, 0.405) |
| Antineoplastic agents        | 71         | 0.091 (0.017, 0.200) |
| Antivirals for systemic use  | 46         | 0.122 (0.011, 0.233) |
| Immunosuppressants           | 35         | 0.376 (0.075, 0.675) |
| All other therapeutic groups | 357        | 0.385 (0.263, 0.506) |

254

255 The 509 drugs were in 57 different second level ATC groups: antineoplastic agents (71),  
256 antivirals for systemic use (46), immunosuppressants (35) and “all other therapeutic groups”  
257 (357) (Supplementary Table 1). Kappa values for the four groups were: 0.091 (95% CI 0.017,  
258 0.200) (poor), 0.200, 0.122 (95% CI 0.011, 0.233) (poor), 0.376 (95% CI 0.075, 0.675)  
259 (fair) and (95% CI 0.263, 0.506)0.385 (fair), respectively. The 95% CIs for the Kappa values

1  
2  
3 260 for the antineoplastic agents, antivirals for systemic use and immunosuppressants overlapped  
4  
5 261 indicating no difference among the groups but there was no overlap of any of these with the  
6  
7 262 95% CI for “all other therapeutic groups”.

8  
9 263

## 10 11 264 **Discussion**

12  
13 265 Almost 30% of the new active substances that Health Canada reviewed between 1995 and  
14  
15 266 2016 went through one of two accelerated review pathways – priority review or NOC/c,  
16  
17 267 primarily a priority review. There is no difference between small molecule drugs and  
18  
19 268 biologics in the approval pathways used indicating that for these two groups Health Canada  
20  
21 269 does not see one or the other being more likely to offer significant new therapeutic benefits.  
22  
23 270 However, the same is not true for the therapeutic subgroups. The three specifically examined  
24  
25 271 – antineoplastics, antivirals and immunosuppressants – were more likely to be assigned to an  
26  
27 272 accelerated review pathway compared to all other therapeutic groups, possibly because of the  
28  
29 273 nature of the diseases that they treat.

30  
31  
32  
33 274

34  
35 275 Just over 80% of the NAS approved had been assessed by the PMPRB and/or La revue  
36  
37 276 Prescrire for their therapeutic benefit. The Kappa value for the 509 drugs was 0.276 meaning  
38  
39 277 that Health Canada’s ability to predict major therapeutic gain from these drugs was only fair.  
40  
41 278 The relatively low Kappa value may relate to when Health Canada makes its decision about  
42  
43 279 what type of approval pathway to use. This assignment is at the start of the review process  
44  
45 280 when all of the data will not have been fully assessed. In contrast, the PMPRB and La revue  
46  
47 281 Prescrire make their assessments after the drug has been marketed when more information  
48  
49 282 about efficacy and safety is available.

50  
51  
52  
53 283

1  
2  
3 284 As was the case with the assignment of an accelerated review pathway, there is no difference  
4  
5 285 in how Health Canada evaluates the therapeutic value of small molecule drugs and biologics.  
6  
7 286 Health Canada seems somewhat better at predicting the therapeutic value of drugs in the “all  
8  
9 287 other therapeutic groups” than it does for drugs in the antineoplastic, antiviral and  
10  
11 288 immunosuppressant groups although it is more likely to review these groups through an  
12  
13 289 accelerated review pathway.  
14

15  
16 290

17  
18 291 How Health Canada uses its accelerated review pathways is important for a number of  
19  
20 292 reasons. First, their use may explicitly create an impression among clinicians and patients that  
21  
22 293 these drugs are likely to deliver major new therapeutic benefits despite the fact that the  
23  
24 294 likelihood that they will is only “fair” as measured by the Kappa value. Second, the NOC/c  
25  
26 295 pathway requires companies to commit to conducting post-market studies to validate the  
27  
28 296 efficacy of the product, but many of these studies are delayed (6, 7), leaving clinicians and  
29  
30 297 patients uncertain about the value of these products. In at least one case, Health Canada did  
31  
32 298 not suspend the sale of a drug and allowed it to stay on the market despite not fulfilling the  
33  
34 299 conditions required under its NOC/c. In December 2003, Iressa (gefitinib) was approved as a  
35  
36 300 third-line treatment for non-small cell lung cancer on the condition that the company submit a  
37  
38 301 study showing that it improved survival (12). When the study results were submitted to  
39  
40 302 Health Canada they showed no survival benefit for gefitinib compared to placebo (13).

41  
42  
43 303 Health Canada recognized that the conditions had not been fulfilled, but rather than removing  
44  
45 304 gefitinib from the market, in February 2005 it elected to allow it to continue to be sold (12).

46  
47  
48 305 In 2009, the drug was deemed to have met its conditions after a new study showed non-  
49  
50 306 inferiority, i.e., survival after taking it was no worse compared to another chemotherapeutic  
51  
52 307 agent (14). Third, although the priority and standard approval pathways are equivalent in  
53  
54 308 terms of the amount of data reviewed, the former is done in 180 days compared to 300 days  
55  
56  
57  
58  
59  
60

1  
2  
3 309 for the latter, meaning that the priority pathway is more resource intensive possibly drawing  
4  
5 310 resources from other Health Canada activities. Finally, drugs reviewed through both  
6  
7 311 accelerated review pathways are more likely to receive safety warnings once they are on the  
8  
9 312 market compared to drugs with a standard approval (2, 15).

10  
11 313

12  
13 314 As Figure 1 indicates, Health Canada is not using the accelerated review pathways more  
14  
15 315 liberally (or more conservatively) over time, but as Figure 2 shows it has not improved its  
16  
17 316 ability to predict therapeutic innovation over the 22 years evaluated in this study. The  
18  
19 317 Introduction describes the criteria that Health Canada uses to assign a drug to either a priority  
20  
21 318 review or a NOC/c review but how those criteria are applied and whether Health Canada  
22  
23 319 periodically reviews its performance are not known. The fact that it appears to be better at  
24  
25 320 predicting therapeutic innovation for some therapeutic subgroups is encouraging.

26  
27 321

28  
29 322 Contrary to the situation in the United States (US) where the Food and Drug Administration  
30  
31 323 (FDA) has been using an increasing number of expedited development or review programs,  
32  
33 324 Health Canada's use of its programs has been relatively stable since 1995. Between 1987 and  
34  
35 325 2014, 43% received a priority review from the FDA and 19% were approved through the fast  
36  
37 326 track program the equivalent of a NOC/c (16). (Drugs could be associated with both  
38  
39 327 programs.) However, when it comes to approving oncology drugs through an accelerated  
40  
41 328 pathway, Health Canada is only marginally better than the FDA. In the US, only 1 of 15  
42  
43 329 (6.7%) oncology drugs approved through an accelerated program from January 1, 2008,  
44  
45 330 through December 31, 2012 had a proven survival benefit compared to the other 6 and 8 that  
46  
47 331 either had no overall survival benefit or an unknown benefit, respectively (17). In this current  
48  
49 332 study, out of 42 neoplastic agents that Health Canada gave an accelerated review to, only 6  
50  
51 333 (14.3%) were rated as therapeutically innovative. While Health Canada used accelerated  
52  
53  
54  
55  
56  
57  
58  
59  
60

1  
2  
3 334 approvals less often than the FDA, it used these pathways more often than the European  
4  
5 335 Medicines Association which applied them to only 70 (12.5%) of 558 new drugs it approved  
6  
7 336 from 1995 to 2009 (18).  
8

9 337

10  
11 338 *Limitations*

12  
13 339 Almost 20% of new drugs approved by Health Canada were not evaluated for their  
14  
15 340 therapeutic innovation by either the PMPRB or La revue Prescrire. The absence of these  
16  
17 341 evaluations may have skewed both the Kappa values in either a more positive or more  
18  
19 342 negative direction.  
20  
21

22 343

23  
24 344 **Conclusion**

25  
26 345 Health Canada continues to use accelerated review pathways for about 30% of new drugs.  
27  
28 346 The rationale for using accelerated review pathways is to get important therapeutic advances  
29  
30 347 to patients in a timely manner, but Health Canada's ability to predict which of these drugs  
31  
32 348 will fulfill this expectation has not improved over a 22-year period and remains relatively  
33  
34 349 low. Moreover, using these pathways come with both health related and resource costs. The  
35  
36 350 findings in this study should provoke a discussion about whether Health Canada should  
37  
38 351 continue to use these pathways and if so how their use can be improved.  
39  
40

41  
42 352  
43  
44  
45  
46  
47  
48  
49  
50  
51  
52  
53  
54  
55  
56  
57  
58  
59  
60

1  
2  
3 353 **Acknowledgements**  
4

5 354 None  
6

7 355 **Competing Interests**  
8

9 356 In 2015-2017, Joel Lexchin received payment from two non-profit organizations for being a  
10  
11 357 consultant on a project looking at indication based prescribing and a second looking at which  
12  
13 358 drugs should be distributed free of charge by general practitioners. In 2015, he received  
14  
15 359 payment from a for-profit organization for being on a panel that discussed expanding drug  
16  
17 360 insurance in Canada. He is on the Foundation Board of Health Action International.  
18  
19

20 361 **Funding**  
21

22 362 This research received no specific grant from any funding agency in the public, commercial  
23  
24 363 or not-for profit sectors.  
25

26 364 **Data sharing**  
27

28 365 Full data that was extracted is available from the online data repository Dryad  
29  
30  
31 366 <http://datadryad.org> with the DOI:  
32

33 367 **Author Contributions**  
34

35 368 JL came up with the idea for this study, gathered and analyzed the data and wrote the  
36  
37 369 manuscript.  
38  
39  
40  
41  
42  
43  
44  
45  
46  
47  
48  
49  
50  
51  
52  
53  
54  
55  
56  
57  
58  
59  
60

1  
2  
3 370 **References**

- 4  
5 371 1. Health Products and Food Branch. Access to therapeutic products: the regulatory  
6  
7 372 process in Canada Ottawa: Health Canada; 2006 [cited 2014 July 20]. Available from:  
8  
9 373 [http://publications.gc.ca/collections/collection\\_2007/hc-sc/H164-9-2006E.pdf](http://publications.gc.ca/collections/collection_2007/hc-sc/H164-9-2006E.pdf).  
10  
11 374 2. Lexchin J. Post-market safety warnings for drugs approved in Canada under the  
12  
13 375 Notice of Compliance with conditions policy. *British Journal of Clinical Pharmacology*.  
14  
15 376 2015;79:847-59.  
16  
17 377 3. Health Canada: Health Products and Food Branch. Guidance for industry: priority  
18  
19 378 review of drug submissions. Ottawa: 2009.  
20  
21 379 4. Health Canada. Notice of compliance with conditions (NOC/c). Ottawa: 2002.  
22  
23 380 5. Lexchin J. Health Canada's use of its priority review process for new drugs: a cohort  
24  
25 381 study. *BMJ Open*. 2015;5:e006816.  
26  
27 382 6. Lexchin J. Notice of compliance with conditions: a policy in limbo. *Healthcare*  
28  
29 383 *Policy*. 2007;2:114-22.  
30  
31 384 7. Law M. The characteristics and fulfillment of conditional prescription drug approvals  
32  
33 385 in Canada. *Health Policy*. 2014;116:154-61.  
34  
35 386 8. Prescrire Editorial Staff. Prescrire's ratings system: gauge the usefulness of new  
36  
37 387 products at glance Paris2011 [cited 2015 March 11]. Available from:  
38  
39 388 <http://english.prescrire.org/en/81/168/46800/0/NewsDetails.aspx>.  
40  
41 389 9. Lexchin J. Postmarket safety in Canada: are significant therapeutic advances and  
42  
43 390 biologics less safe than other drugs? A cohort study. *BMJ Open*. 2014;4:e004289.  
44  
45 391 10. Landis JR, Koch GG. The measurement of observer agreement for categorical data.  
46  
47 392 *Biometrics*. 1977;33:159-74.  
48  
49  
50  
51  
52  
53  
54  
55  
56  
57  
58  
59  
60

- 1  
2  
3 393 11. WHO Collaborating Centre for Drug Statistics Methodology, Norwegian Institute of  
4  
5 394 Public Health. Structure and principles 2011 [cited 2018 February 20]. Available from:  
6  
7 395 [http://www.whooc.no/atc/structure\\_and\\_principles/](http://www.whooc.no/atc/structure_and_principles/).  
8  
9 396 12. Health Canada. Clarification from Health Canada regarding the status of Iressa®  
10  
11 397 (gefitinib) in Canada Ottawa2005 [cited 2014 October 20]. Available from: [http://www.hc-](http://www.hc-sc.gc.ca/dhp-mpps/prodpharma/activit/fs-fi/fact_iressa-eng.php)  
12  
13 398 [sc.gc.ca/dhp-mpps/prodpharma/activit/fs-fi/fact\\_iressa-eng.php](http://www.hc-sc.gc.ca/dhp-mpps/prodpharma/activit/fs-fi/fact_iressa-eng.php).  
14  
15 399 13. Thatcher N, Chang A, Parikh P, Pereira J, Ciuleanu T, von Pawel J, et al. Gefitinib  
16  
17 400 plus best supportive care in previous treated patients with refractory advanced non-small-cell  
18  
19 401 lung cancer: results from a randomised, placebo-controlled, multicentre study (Iressa  
20  
21 402 Survival Evaluation in Lung Cancer). *Lancet*. 2005;366:1527-37.  
22  
23 403 14. Kim E, Hirsh V, Mok T, Socinski M, Gervais R, Wu Y-L, et al. Gefitinib versus  
24  
25 404 docetaxel in previously treated non-small-cell lung cancer (INTEREST): a randomised phase  
26  
27 405 III trial. *Lancet*. 2008;372:1809-18.  
28  
29 406 15. Lexchin J. New drugs and safety: what happened to new active substances approved  
30  
31 407 in Canada between 1995 and 2010? *Archives of Internal Medicine*. 2012;172:1680-1.  
32  
33 408 16. Kesselheim A, Wang B, Franklin J, Darrow J. Trends in utilization of FDA expedited  
34  
35 409 drug development and approval programs, 1987-2014: cohort study. *BMJ*. 2015;351:h4633.  
36  
37 410 17. Kim C, Prasad V. Cancer drugs approved on the basis of a surrogate end point and  
38  
39 411 subsequent overall survival: an analysis of 5 years of US Food and Drug Administration  
40  
41 412 approvals. *JAMA Internal Medicine*. 2015;175:1992-4.  
42  
43 413 18. Boon W, Moors E, Meijer A, Schellekens H. Conditional approval and approval  
44  
45 414 under exceptional circumstances as regulatory instruments for stimulating responsible drug  
46  
47 415 innovation in Europe. *Clinical Pharmacology & Therapeutics*. 2010;88:848-53.  
48  
49  
50  
51  
52  
53  
54  
55  
56  
57  
58  
59  
60



**Supplementary Table 1: All drugs approved between 1995-2016 that received therapeutic assessment**

| Generic name                            | Brand name        | PMPRB<br>breakthrough,<br>substantial<br>improvement<br>and/or | PMPRB<br>and/or<br>Prescribe no<br>significant<br>therapeutic | Standard | Priority | Notice of<br>compliance<br>with<br>conditions |
|-----------------------------------------|-------------------|----------------------------------------------------------------|---------------------------------------------------------------|----------|----------|-----------------------------------------------|
| Adapalene                               | Differin          |                                                                | 1                                                             | 1        |          |                                               |
| Dexrazoxane                             | Zinecard          | 1                                                              |                                                               | 1        |          |                                               |
| Bambuterol                              | Bambec            |                                                                | 1                                                             | 1        |          |                                               |
| Naltrexone                              | Revia             |                                                                | 1                                                             | 1        |          |                                               |
| Cefprozil                               | Cefzil            |                                                                | 1                                                             | 1        |          |                                               |
| Zuclopenthixol                          | Clopixol          |                                                                | 1                                                             | 1        |          |                                               |
| Zuclopenthixol                          | Clopixol acuphase |                                                                | 1                                                             | 1        |          |                                               |
| Zuclopenthixol                          | Clopixol depot    |                                                                | 1                                                             | 1        |          |                                               |
| Lansoprazole                            | Prevacid          |                                                                | 1                                                             | 1        |          |                                               |
| Cefepime                                | Maxipime          |                                                                | 1                                                             | 1        |          |                                               |
| Interferon Beta-1B                      | Betaseron         |                                                                | 1                                                             |          | 1        |                                               |
| Famciclovir                             | Famvir            |                                                                | 1                                                             | 1        |          |                                               |
| Cefpodoxime                             | Orelox            |                                                                | 1                                                             | 1        |          |                                               |
| Sevoflurane                             | Sevorane          |                                                                | 1                                                             | 1        |          |                                               |
| Losartan                                | Cozaar            |                                                                | 1                                                             | 1        |          |                                               |
| Iotrolan                                | Osmovist 280      |                                                                | 1                                                             | 1        |          |                                               |
| Bicalutamide                            | Casodex           |                                                                | 1                                                             | 1        |          |                                               |
| Acarbose                                | Prandase          |                                                                | 1                                                             | 1        |          |                                               |
| Mycophenolate                           | Cellcept          |                                                                | 1                                                             | 1        |          |                                               |
| Tacrolimus                              | Prograf           |                                                                | 1                                                             |          | 1        |                                               |
| Lamivudine                              | 3TC               |                                                                | 1                                                             |          | 1        |                                               |
| Alendronate                             | Fosamax           |                                                                | 1                                                             | 1        |          |                                               |
| Stavudine                               | Zerit             |                                                                | 1                                                             | 1        |          |                                               |
| Acellular pertussis<br>vaccine adsorbed | Acel-P            |                                                                | 1                                                             |          | 1        |                                               |
| Dorzolamide                             | Trusopt           |                                                                | 1                                                             | 1        |          |                                               |
| Amifostine                              | Ethyol            | 1                                                              |                                                               |          | 1        |                                               |

|    |                       |                    |   |   |   |
|----|-----------------------|--------------------|---|---|---|
| 1  |                       |                    |   |   |   |
| 2  |                       |                    |   |   |   |
| 3  | Valacyclovir          | Valtrex            | 1 | 1 |   |
| 4  | Quinagolide           | Norprolac          | 1 | 1 |   |
| 5  | Meropenem             | Merrem             | 1 | 1 |   |
| 6  |                       |                    |   |   |   |
| 7  |                       |                    |   |   |   |
| 8  | Abciximab             | Reopro             | 1 | 1 |   |
| 9  | Anastrozole           | Arimidex           | 1 | 1 |   |
| 10 | Ritonavir             | Norvir             | 1 |   | 1 |
| 11 | Raltitrexed           | Tomudex            | 1 |   | 1 |
| 12 | Indinavir             | Crixivan           | 1 |   | 1 |
| 13 | Insulin lispro        | Humalog            | 1 | 1 |   |
| 14 | Dirithromycin         | Dynabac            | 1 | 1 |   |
| 15 |                       |                    |   |   |   |
| 16 |                       |                    |   |   |   |
| 17 |                       |                    |   |   |   |
| 18 | Olanzapine            | Zyprexa            | 1 | 1 |   |
| 19 | Nalmefene             | Revex              | 1 | 1 |   |
| 20 | Zolpidem              | Ambien             | 1 | 1 |   |
| 21 | Desflurane            | Suprane            | 1 | 1 |   |
| 22 | Gemcitabine           | Gemzar             | 1 | 1 |   |
| 23 | Ropivacaine           | Naropin injections | 1 | 1 |   |
| 24 | Imiglucerase          | Cerezyme           | 1 |   | 1 |
| 25 |                       |                    |   |   |   |
| 26 |                       |                    |   |   |   |
| 27 |                       |                    |   |   |   |
| 28 | Atorvastatin          | Lipitor            | 1 |   | 1 |
| 29 | Topiramate            | Topamax            | 1 | 1 |   |
| 30 | Formoterol            | Foradil dry        | 1 | 1 |   |
| 31 |                       | powder capsules    |   |   |   |
| 32 |                       |                    |   |   |   |
| 33 | Epoprostenol          | Flolan             | 1 |   | 1 |
| 34 | Coagulation factor IX | Benefix            | 1 |   | 1 |
| 35 |                       |                    |   |   |   |
| 36 |                       |                    |   |   |   |
| 37 | Topotecan             | Hycamtin           | 1 | 1 |   |
| 38 | Dolasetron            | Anzemet            | 1 | 1 |   |
| 39 |                       |                    |   |   |   |
| 40 |                       |                    |   |   |   |
| 41 | Letrozole             | Femara             | 1 | 1 |   |
| 42 | Fexofenadine          | Allegra            | 1 | 1 |   |
| 43 |                       |                    |   |   |   |
| 44 |                       |                    |   |   |   |
| 45 | Latanoprost           | Xalatan            | 1 | 1 |   |
| 46 | Carbetocin            | Duratocin          | 1 | 1 |   |
| 47 |                       |                    |   |   |   |
| 48 |                       |                    |   |   |   |
| 49 | Follitropin beta      | Puregon            | 1 | 1 |   |
| 50 |                       |                    |   |   |   |
| 51 |                       |                    |   |   |   |
| 52 | Irinotecan            | Camptosar          | 1 | 1 |   |
| 53 | Donepezil             | Aricept            | 1 | 1 |   |
| 54 | Ropinirole            | Requip             | 1 | 1 |   |
| 55 |                       |                    |   |   |   |
| 56 |                       |                    |   |   |   |
| 57 |                       |                    |   |   |   |
| 58 |                       |                    |   |   |   |
| 59 |                       |                    |   |   |   |
| 60 |                       |                    |   |   |   |

|    |                    |                     |   |   |   |  |   |
|----|--------------------|---------------------|---|---|---|--|---|
| 1  |                    |                     |   |   |   |  |   |
| 2  |                    |                     |   |   |   |  |   |
| 3  | Ibandronate        | Bondronat           | 1 | 1 |   |  |   |
| 4  |                    |                     |   |   |   |  |   |
| 5  | Glatiramer         | Copaxone for        | 1 | 1 |   |  |   |
| 6  |                    | injection           |   |   |   |  |   |
| 7  | Tolcapone          | Tasmar              | 1 | 1 |   |  |   |
| 8  | Zafirlukast        | Accolate            | 1 | 1 |   |  |   |
| 9  |                    |                     |   |   |   |  |   |
| 10 |                    |                     |   |   |   |  |   |
| 11 | Valsartan          | Diovan              | 1 | 1 |   |  |   |
| 12 |                    |                     |   |   |   |  |   |
| 13 |                    |                     |   |   |   |  |   |
| 14 | Levofloxacin       | Levaquin            | 1 | 1 |   |  |   |
| 15 |                    |                     |   |   |   |  |   |
| 16 | Brimonidine        | Alphagan            | 1 | 1 |   |  |   |
| 17 |                    | ophthalmic solution |   |   |   |  |   |
| 18 | Quetiapine         | Seroquel            | 1 | 1 |   |  |   |
| 19 | Pramipexole        | Mirapex             | 1 | 1 |   |  |   |
| 20 | Interferon Beta-1A | Rebif               | 1 | 1 |   |  |   |
| 21 | Emedastine         | Emadine             | 1 | 1 |   |  |   |
| 22 |                    | ophthalmic          |   |   |   |  |   |
| 23 | Cerivastatin       | Baycol              | 1 | 1 |   |  |   |
| 24 | Grepafloxacin      | Raxar               | 1 | 1 |   |  |   |
| 25 |                    |                     |   |   |   |  |   |
| 26 |                    |                     |   |   |   |  |   |
| 27 | Naratriptan        | Amerge              | 1 | 1 |   |  |   |
| 28 | Bupropion          | Wellbutrin SR       | 1 | 1 |   |  |   |
| 29 | Irbesartan         | Avapro              | 1 | 1 |   |  |   |
| 30 |                    |                     |   |   |   |  |   |
| 31 |                    |                     |   |   |   |  |   |
| 32 |                    |                     |   |   |   |  |   |
| 33 |                    |                     |   |   |   |  |   |
| 34 | Tamsulosin         | Flomax              | 1 | 1 |   |  |   |
| 35 | Montelukast        | Singulair           | 1 | 1 |   |  |   |
| 36 |                    |                     |   |   |   |  |   |
| 37 |                    |                     |   |   |   |  |   |
| 38 | Delavirdine        | Rescriptor          | 1 | 1 |   |  | 1 |
| 39 | Nelfinavir         | Viracept            | 1 |   | 1 |  |   |
| 40 | Zolmitriptan       | Zomig               | 1 | 1 |   |  |   |
| 41 | Capecitabine       | Xeloda              | 1 |   | 1 |  |   |
| 42 | Nevirapine         | Viramune            | 1 | 1 |   |  | 1 |
| 43 | Clopidogrel        | Plavix              | 1 | 1 |   |  |   |
| 44 | Brinzolamide       | Azopt ophthalmic    | 1 | 1 |   |  |   |
| 45 |                    | suspension          |   |   |   |  |   |
| 46 | Raloxifene         | Evista              | 1 | 1 |   |  |   |
| 47 |                    |                     |   |   |   |  |   |
| 48 |                    |                     |   |   |   |  |   |
| 49 |                    |                     |   |   |   |  |   |
| 50 |                    |                     |   |   |   |  |   |
| 51 |                    |                     |   |   |   |  |   |
| 52 | Candesartan        | Atacand             | 1 | 1 |   |  |   |
| 53 |                    |                     |   |   |   |  |   |
| 54 | Tolterodine        | Detrol              | 1 | 1 |   |  |   |
| 55 | Varicella vaccine  | Varivax             | 1 | 1 |   |  |   |
| 56 |                    |                     |   |   |   |  |   |
| 57 |                    |                     |   |   |   |  |   |
| 58 |                    |                     |   |   |   |  |   |
| 59 |                    |                     |   |   |   |  |   |
| 60 |                    |                     |   |   |   |  |   |

|    |                  |                  |   |   |   |   |
|----|------------------|------------------|---|---|---|---|
| 1  |                  |                  |   |   |   |   |
| 2  |                  |                  |   |   |   |   |
| 3  | Alatrofloxacin   | Trovan (IV)      | 1 | 1 |   |   |
| 4  |                  |                  |   |   |   |   |
| 5  | Trovafloracin    | Trovan (tablets) | 1 | 1 |   |   |
| 6  |                  |                  |   |   |   |   |
| 7  |                  |                  |   |   |   |   |
| 8  | Becaplermin gel  | Regranex         | 1 | 1 |   |   |
| 9  |                  |                  |   |   |   |   |
| 10 |                  |                  |   |   |   |   |
| 11 | Tizanidine       | Zanaflex         | 1 | 1 |   |   |
| 12 | Penciclovir      | Denavir          | 1 | 1 |   |   |
| 13 | Citalopram       | Celexa           | 1 | 1 |   |   |
| 14 | Recombinant      | Niastase         | 1 |   | 1 | 1 |
| 15 | factor VIIa      |                  |   |   |   |   |
| 16 | Modafinil        | Alertec          | 1 | 1 |   |   |
| 17 | Sildenafil       | Viagra           | 1 | 1 |   |   |
| 18 |                  |                  |   |   |   |   |
| 19 | Recombinant-     | Infergen         | 1 |   | 1 |   |
| 20 | methionyl        |                  |   |   |   |   |
| 21 | interferon       |                  |   |   |   |   |
| 22 | consensus 1      |                  |   |   |   |   |
| 23 | Efavirenz        | Sustiva          | 1 |   | 1 |   |
| 24 | Repaglinide      | Gluconorm        | 1 | 1 |   |   |
| 25 | Celecoxib        | Celebrex         | 1 |   | 1 |   |
| 26 |                  |                  |   |   |   |   |
| 27 |                  |                  |   |   |   |   |
| 28 |                  |                  |   |   |   |   |
| 29 | Triptorelin      | Trelstar         | 1 | 1 |   |   |
| 30 | Ancestim         | Stemgen          | 1 | 1 |   |   |
| 31 | Orlistat         | Xenical          | 1 | 1 |   |   |
| 32 | Abacavir         | Ziagen           | 1 |   | 1 | 1 |
| 33 | Eptifibatide     | Integrilin       | 1 | 1 |   |   |
| 34 | Eprosartan       | Teveten          | 1 | 1 |   |   |
| 35 |                  |                  |   |   |   |   |
| 36 |                  |                  |   |   |   |   |
| 37 |                  |                  |   |   |   |   |
| 38 | Cidofovir        | Vistide          | 1 | 1 |   |   |
| 39 | Rizatriptan      | Maxalt           | 1 | 1 |   |   |
| 40 | Trastuzumab      | Herceptin        | 1 |   | 1 |   |
| 41 | Telmisartan      | Micardis         | 1 | 1 |   |   |
| 42 |                  |                  |   |   |   |   |
| 43 |                  |                  |   |   |   |   |
| 44 | Risedronate      | Actonel          | 1 | 1 |   |   |
| 45 |                  |                  |   |   |   |   |
| 46 |                  |                  |   |   |   |   |
| 47 | Tirofiban        | Aggrastat        | 1 | 1 |   |   |
| 48 | Icodextrin       | Extraneal        | 1 | 1 |   |   |
| 49 |                  |                  |   |   |   |   |
| 50 |                  |                  |   |   |   |   |
| 51 | Varicella zoster | Varilrix         | 1 |   | 1 |   |
| 52 | vaccine          |                  |   |   |   |   |
| 53 | Temozolomide     | Temodal          | 1 | 1 |   |   |
| 54 | Rofecoxib        | Vioxx            | 1 |   | 1 |   |
| 55 |                  |                  |   |   |   |   |
| 56 |                  |                  |   |   |   |   |
| 57 |                  |                  |   |   |   |   |
| 58 |                  |                  |   |   |   |   |
| 59 |                  |                  |   |   |   |   |
| 60 |                  |                  |   |   |   |   |

|    |                       |            |   |  |   |   |
|----|-----------------------|------------|---|--|---|---|
| 1  |                       |            |   |  |   |   |
| 2  |                       |            |   |  |   |   |
| 3  | Zanamivir             | Relenza    |   |  | 1 | 1 |
| 4  | Melanoma              | Melacine   |   |  | 1 | 1 |
| 5  | theracine             |            |   |  |   |   |
| 6  |                       |            |   |  |   |   |
| 7  | Gadobutrol            | Gadovist   |   |  | 1 | 1 |
| 8  | Dalfopristin          | Synercid   |   |  | 1 | 1 |
| 9  |                       |            |   |  |   |   |
| 10 |                       |            |   |  |   |   |
| 11 | Oseltamivir           | Tamiflu    |   |  | 1 | 1 |
| 12 | Daclizumab            | Zenaprax   |   |  | 1 | 1 |
| 13 | Leflunomide           | Arava      |   |  | 1 | 1 |
| 14 | Rituximab             | Rituxan    | 1 |  |   | 1 |
| 15 | Rosiglitazone         | Avandia    |   |  | 1 | 1 |
| 16 | Oxcarbazepine         | Trileptal  |   |  | 1 | 1 |
| 17 | Rivastigmine          | Exelon     |   |  | 1 | 1 |
| 18 | Zaleplon              | Starnoc    |   |  | 1 | 1 |
| 19 | Verteporfin           | Visudyne   | 1 |  |   | 1 |
| 20 | Cabergoline           | Dostinex   |   |  | 1 | 1 |
| 21 | Exemestane            | Aromasin   |   |  | 1 | 1 |
| 22 | Pioglitazone          | Actos      |   |  | 1 | 1 |
| 23 | Zoledronic acid       | Zometa     |   |  | 1 | 1 |
| 24 |                       |            |   |  |   |   |
| 25 |                       |            |   |  |   |   |
| 26 |                       |            |   |  |   |   |
| 27 |                       |            |   |  |   |   |
| 28 | Riluzole              | Rilutek    | 1 |  |   | 1 |
| 29 | Meloxicam             | Mobic      |   |  | 1 | 1 |
| 30 |                       |            |   |  |   |   |
| 31 |                       |            |   |  |   |   |
| 32 | Basiliximab           | Simulect   |   |  | 1 | 1 |
| 33 | Moxifloxacin          | Avelox     |   |  | 1 | 1 |
| 34 |                       |            |   |  |   |   |
| 35 |                       |            |   |  |   |   |
| 36 | Peginterferon Alfa-2b | Peg-intron |   |  | 1 | 1 |
| 37 |                       |            |   |  |   |   |
| 38 | Etanercept            | Enbrel     | 1 |  |   | 1 |
| 39 | Gadoversetamide       | Optimark   |   |  | 1 | 1 |
| 40 | Sibutramine           | Meridia    |   |  | 1 | 1 |
| 41 | Sirolimus             | Rapamune   |   |  | 1 | 1 |
| 42 | Gatifloxacin          | Tequin     |   |  | 1 | 1 |
| 43 |                       |            |   |  |   |   |
| 44 |                       |            |   |  |   |   |
| 45 |                       |            |   |  |   |   |
| 46 | Glucagon, rDNA origin | Glucagon   |   |  | 1 | 1 |
| 47 |                       |            |   |  |   |   |
| 48 | Mequinol/tretinoin    | Solage     |   |  | 1 | 1 |
| 49 |                       |            |   |  |   |   |
| 50 |                       |            |   |  |   |   |
| 51 | Amprenavir            | Agenerase  |   |  | 1 | 1 |
| 52 | Lopinavir/ritonavir   | Kaletra    |   |  | 1 | 1 |
| 53 | Linezolid             | Zyvoxam    |   |  | 1 | 1 |
| 54 |                       |            |   |  |   |   |
| 55 |                       |            |   |  |   |   |
| 56 | Iron                  | Venofer    |   |  | 1 | 1 |
| 57 |                       |            |   |  |   |   |
| 58 |                       |            |   |  |   |   |
| 59 |                       |            |   |  |   |   |
| 60 |                       |            |   |  |   |   |

|    |                     |            |   |   |   |   |
|----|---------------------|------------|---|---|---|---|
| 1  |                     |            |   |   |   |   |
| 2  |                     |            |   |   |   |   |
| 3  | Doxercalciferol     | Hectorol   | 1 | 1 |   |   |
| 4  | Rabeprazole         | Pariet     | 1 | 1 |   |   |
| 5  |                     |            |   |   |   |   |
| 6  |                     |            |   |   |   |   |
| 7  | Entacapone          | Comtan     | 1 | 1 |   |   |
| 8  | Eflornithine        | Vaniqa     | 1 | 1 |   |   |
| 9  | Mirtazapine         | Remeron    | 1 | 1 |   |   |
| 10 | Desloratadine       | Aerius     | 1 | 1 |   |   |
| 11 |                     |            |   |   |   |   |
| 12 |                     |            |   |   |   |   |
| 13 | Infliximab          | Remicade   | 1 | 1 |   |   |
| 14 | Caspofungin         | Cancidas   | 1 |   | 1 |   |
| 15 |                     |            |   |   |   |   |
| 16 |                     |            |   |   |   |   |
| 17 | Galantamine         | Reminyl    | 1 | 1 |   |   |
| 18 | Esomeprazole        | Nexium     | 1 | 1 |   |   |
| 19 |                     |            |   |   |   |   |
| 20 |                     |            |   |   |   |   |
| 21 | Imatinib            | Gleevec    | 1 |   | 1 | 1 |
| 22 | Tenecteplase        | Tnkase     | 1 | 1 |   |   |
| 23 | Travoprost          | Travatan   | 1 | 1 |   |   |
| 24 | Bosentan            | Tracleer   | 1 |   | 1 |   |
| 25 | Meningococcal       | Neisvac-C  | 1 |   | 1 |   |
| 26 | group C             |            |   |   |   |   |
| 27 | polysaccharide,     |            |   |   |   |   |
| 28 | tetanus toxoid      |            |   |   |   |   |
| 29 |                     |            |   |   |   |   |
| 30 |                     |            |   |   |   |   |
| 31 | Glimepiride         | Amaryl     | 1 | 1 |   |   |
| 32 | Nateglinide         | Starlix    | 1 | 1 |   |   |
| 33 | Alfuzosin           | Xatral     | 1 | 1 |   |   |
| 34 | Tegaserod           | Zelnorm    | 1 | 1 |   |   |
| 35 | Ganirelix           | Orgalutran | 1 | 1 |   |   |
| 36 |                     |            |   |   |   |   |
| 37 |                     |            |   |   |   |   |
| 38 | Valganciclovir      | Valcyte    | 1 | 1 |   |   |
| 39 | Palivizumab         | Synagis    | 1 | 1 |   |   |
| 40 |                     |            |   |   |   |   |
| 41 |                     |            |   |   |   |   |
| 42 | Docosanol           | Abreva     | 1 | 1 |   |   |
| 43 |                     |            |   |   |   |   |
| 44 |                     |            |   |   |   |   |
| 45 |                     |            |   |   |   |   |
| 46 | Bimatoprost         | Lumigan    | 1 | 1 |   |   |
| 47 | Anakinra            | Kineret    | 1 |   | 1 |   |
| 48 | Moroctocog alpha    | Refacto    | 1 |   | 1 |   |
| 49 | Peginterferon Alfa- | Pegatron   | 1 | 1 |   |   |
| 50 | 2b ribavirin        |            |   |   |   |   |
| 51 | Fondaparinux        | Arixtra    | 1 |   | 1 |   |
| 52 | Hetastarch          | Hextend    | 1 | 1 |   |   |
| 53 |                     |            |   |   |   |   |
| 54 |                     |            |   |   |   |   |
| 55 | Darbepoetin alpha   | Aranesp    | 1 | 1 |   |   |
| 56 |                     |            |   |   |   |   |
| 57 |                     |            |   |   |   |   |
| 58 |                     |            |   |   |   |   |
| 59 |                     |            |   |   |   |   |
| 60 |                     |            |   |   |   |   |

|    |                     |           |   |   |   |  |   |   |
|----|---------------------|-----------|---|---|---|--|---|---|
| 1  |                     |           |   |   |   |  |   |   |
| 2  |                     |           |   |   |   |  |   |   |
| 3  | Norelgestromin/et   | Evra      |   | 1 | 1 |  |   |   |
| 4  | hinyl estradiol     |           |   |   |   |  |   |   |
| 5  |                     |           |   |   |   |  |   |   |
| 6  |                     |           |   |   |   |  |   |   |
| 7  | Treprostinil        | Remodulin |   | 1 |   |  | 1 |   |
| 8  | Bivalirudin         | Angiomax  |   | 1 | 1 |  |   |   |
| 9  | Tiotropium          | Spiriva   |   | 1 | 1 |  |   |   |
| 10 |                     |           |   |   |   |  |   |   |
| 11 |                     |           |   |   |   |  |   |   |
| 12 | Valdecoxib          | Betra     |   | 1 | 1 |  |   |   |
| 13 |                     |           |   |   |   |  |   |   |
| 14 | Drotrecogin Alfa    | Xigris    | 1 |   |   |  | 1 |   |
| 15 | Rosuvastatin        | Crestor   |   | 1 | 1 |  |   |   |
| 16 | Recombinant         | Dukoral   |   | 1 |   |  | 1 |   |
| 17 | cholera toxin B     |           |   |   |   |  |   |   |
| 18 | subunit             |           |   |   |   |  |   |   |
| 19 |                     |           |   |   |   |  |   |   |
| 20 | Levetiracetam       | Keppra    |   | 1 | 1 |  |   |   |
| 21 | Tenofovir           | Viread    |   | 1 |   |  | 1 | 1 |
| 22 | Pimecrolimus        | Elidel    |   | 1 | 1 |  |   |   |
| 23 |                     |           |   |   |   |  |   |   |
| 24 |                     |           |   |   |   |  |   |   |
| 25 |                     |           |   |   |   |  |   |   |
| 26 | Ertapenem           | Invanz    |   | 1 | 1 |  |   |   |
| 27 |                     |           |   |   |   |  |   |   |
| 28 | Ezetimibe           | Ezetrol   |   | 1 | 1 |  |   |   |
| 29 | Telithromycin       | Ketek     |   | 1 | 1 |  |   |   |
| 30 |                     |           |   |   |   |  |   |   |
| 31 |                     |           |   |   |   |  |   |   |
| 32 | Enfuvirtide         | Fuzeon    | 1 |   |   |  | 1 |   |
| 33 | Dutasteride         | Avodart   |   | 1 | 1 |  |   |   |
| 34 | Peginterferon Alfa- | Pegasys   |   | 1 | 1 |  |   |   |
| 35 | 2a                  |           |   |   |   |  |   |   |
| 36 | Cetorelix           | Cetrotide |   | 1 | 1 |  |   |   |
| 37 |                     |           |   |   |   |  |   |   |
| 38 |                     |           |   |   |   |  |   |   |
| 39 | Adefovir            | Hepsera   |   | 1 |   |  | 1 |   |
| 40 | Tadalafil           | Cialis    |   | 1 | 1 |  |   |   |
| 41 | Almotriptan         | Axert     |   | 1 | 1 |  |   |   |
| 42 |                     |           |   |   |   |  |   |   |
| 43 |                     |           |   |   |   |  |   |   |
| 44 | Rasburicase         | Fasturtec |   | 1 |   |  | 1 |   |
| 45 |                     |           |   |   |   |  |   |   |
| 46 |                     |           |   |   |   |  |   |   |
| 47 | Atazanavir          | Reyataz   |   | 1 |   |  | 1 |   |
| 48 | Gefitinib           | Iressa    |   | 1 |   |  | 1 | 1 |
| 49 | Agalsidase Beta     | Fabrazyme |   | 1 |   |  | 1 |   |
| 50 |                     |           |   |   |   |  |   |   |
| 51 |                     |           |   |   |   |  |   |   |
| 52 | Agalsidase          | Replagal  | 1 |   |   |  | 1 | 1 |
| 53 |                     |           |   |   |   |  |   |   |
| 54 |                     |           |   |   |   |  |   |   |
| 55 | Fulvestrant         | Faslodex  |   | 1 | 1 |  |   |   |
| 56 |                     |           |   |   |   |  |   |   |
| 57 |                     |           |   |   |   |  |   |   |
| 58 |                     |           |   |   |   |  |   |   |
| 59 |                     |           |   |   |   |  |   |   |
| 60 |                     |           |   |   |   |  |   |   |

|    |                     |              |   |   |   |
|----|---------------------|--------------|---|---|---|
| 1  |                     |              |   |   |   |
| 2  |                     |              |   |   |   |
| 3  | Gemifloxacin        | Factive      |   | 1 | 1 |
| 4  |                     |              |   |   |   |
| 5  |                     |              |   |   |   |
| 6  | Pegfilgrastim       | Neulasta     |   | 1 | 1 |
| 7  | Vardenafil          | Levitra      |   | 1 | 1 |
| 8  | Gadobenate          | Multihance   |   | 1 | 1 |
| 9  | Miglustat           | Zavesca      |   | 1 | 1 |
| 10 |                     |              |   |   |   |
| 11 |                     |              |   |   |   |
| 12 | Botulinum Toxin     | Myobloc      |   | 1 | 1 |
| 13 | Type B              |              |   |   |   |
| 14 | Peginterferon Alfa- | Pegasys RBV  |   | 1 | 1 |
| 15 | 2A Ribavirin        |              |   |   |   |
| 16 | Ethinyl             | Nuvaring     |   | 1 | 1 |
| 17 | estradiol/etonoge   |              |   |   |   |
| 18 | strel               |              |   |   |   |
| 19 |                     |              |   |   |   |
| 20 | Pemetrexed          | Alimta       |   | 1 | 1 |
| 21 | Laronidase          | Adlurazyme   | 1 |   | 1 |
| 22 |                     |              |   |   |   |
| 23 |                     |              |   |   |   |
| 24 | Teriparatide        | Forteo       |   | 1 | 1 |
| 25 | Cinacalcet          | Sensipar     | 1 |   | 1 |
| 26 | Eletriptan          | Relpax       |   | 1 | 1 |
| 27 | Voriconazole        | Vfend        |   | 1 | 1 |
| 28 |                     |              |   |   |   |
| 29 |                     |              |   |   |   |
| 30 |                     |              |   |   |   |
| 31 | Frovatriptan        | Frova        |   | 1 | 1 |
| 32 | Adalimumab          | Humira       |   | 1 | 1 |
| 33 | Alefacept           | Amevive      |   | 1 | 1 |
| 34 | Omalizumab          | Xolair       |   | 1 | 1 |
| 35 |                     |              |   |   |   |
| 36 |                     |              |   |   |   |
| 37 | Memantine           | Ebixa        |   | 1 | 1 |
| 38 | Fosamprenavir       | Telzir       |   | 1 | 1 |
| 39 | Drospirenone/ethi   | Yasmin 21/28 |   | 1 | 1 |
| 40 | nyl estradiol       |              |   |   |   |
| 41 |                     |              |   |   |   |
| 42 |                     |              |   |   |   |
| 43 | Atomoxetine         | Strattera    |   | 1 | 1 |
| 44 | Escitalopram        | Cipralex     |   | 1 | 1 |
| 45 | Bortezomib          | Velcade      |   | 1 | 1 |
| 46 | Paricalcitol        | Zemplar      |   | 1 | 1 |
| 47 | Pantoprazole        | Pantaloc M   |   | 1 | 1 |
| 48 |                     |              |   |   |   |
| 49 |                     |              |   |   |   |
| 50 |                     |              |   |   |   |
| 51 | Pegaptanib          | Macugen      | 1 |   | 1 |
| 52 | Ibritumomab         | Zevalin      |   | 1 | 1 |
| 53 |                     |              |   |   |   |
| 54 | Pregabalin          | Lyrica       |   | 1 | 1 |
| 55 |                     |              |   |   |   |
| 56 |                     |              |   |   |   |
| 57 |                     |              |   |   |   |
| 58 |                     |              |   |   |   |
| 59 |                     |              |   |   |   |
| 60 |                     |              |   |   |   |



|    |                    |            |   |   |   |  |   |   |
|----|--------------------|------------|---|---|---|--|---|---|
| 1  |                    |            |   |   |   |  |   |   |
| 2  |                    |            |   |   |   |  |   |   |
| 3  | Lutropin Alfa      | Luveris    |   | 1 | 1 |  |   |   |
| 4  |                    |            |   |   |   |  |   |   |
| 5  |                    |            |   |   |   |  |   |   |
| 6  |                    |            |   |   |   |  |   |   |
| 7  | Erlotinib          | Tarceva    |   | 1 |   |  | 1 |   |
| 8  | Tramadol           | Tramacet   |   | 1 | 1 |  |   |   |
| 9  | Sodium oxybate     | Xyrem      |   | 1 | 1 |  |   |   |
| 10 | Perindopril        | Coversyl   |   | 1 | 1 |  |   |   |
| 11 |                    |            |   |   |   |  |   |   |
| 12 |                    |            |   |   |   |  |   |   |
| 13 | Bevacizumab        | Avastin    |   | 1 |   |  | 1 |   |
| 14 | Cetuximab          | Erbitux    |   | 1 |   |  | 1 |   |
| 15 | Insulin detemir    | Levemir    |   | 1 | 1 |  |   |   |
| 16 | Pegvisomant        | Somavert   |   | 1 |   |  | 1 |   |
| 17 |                    |            |   |   |   |  |   |   |
| 18 |                    |            |   |   |   |  |   |   |
| 19 | Efalizumab         | Raptiva    |   | 1 | 1 |  |   |   |
| 20 | Darifenacin        | Enablex    |   | 1 | 1 |  |   |   |
| 21 | Emtricitabine      | Emtriva    |   | 1 | 1 |  |   |   |
| 22 | Tipranavir         | Aptivus    |   | 1 |   |  | 1 |   |
| 23 | Alemtuzumab        | Mabcampath | 1 |   | 1 |  |   |   |
| 24 | Palifermin         | Kepivance  | 1 |   |   |  | 1 |   |
| 25 |                    |            |   |   |   |  |   |   |
| 26 |                    |            |   |   |   |  |   |   |
| 27 |                    |            |   |   |   |  |   |   |
| 28 | Trospium           | Trosec     |   | 1 | 1 |  |   |   |
| 29 | Solifenacin        | Vesicare   |   | 1 | 1 |  |   |   |
| 30 | Histrelin          | Vantas     |   | 1 | 1 |  |   |   |
| 31 | Insulin glulisine  | Apidra     |   | 1 | 1 |  |   |   |
| 32 | Sunitinib          | Sutent     |   | 1 |   |  | 1 | 1 |
| 33 | Entecavir          | Baraclude  |   | 1 |   |  | 1 |   |
| 34 |                    |            |   |   |   |  |   |   |
| 35 |                    |            |   |   |   |  |   |   |
| 36 |                    |            |   |   |   |  |   |   |
| 37 | Abatacept          | Orencia    |   | 1 |   |  | 1 |   |
| 38 | Recombinant        | Gardasil   | 1 |   |   |  | 1 |   |
| 39 | human              |            |   |   |   |  |   |   |
| 40 | papillomavirus     |            |   |   |   |  |   |   |
| 41 | Lanreotide         | Somatuline |   | 1 | 1 |  |   |   |
| 42 |                    | autogel    |   |   |   |  |   |   |
| 43 |                    |            |   |   |   |  |   |   |
| 44 | Sorafenib          | Nexavar    |   | 1 | 1 |  |   |   |
| 45 | Darunavir          | Prezista   |   | 1 | 1 |  |   | 1 |
| 46 | Rotaviruses        | Rotateq    | 1 |   | 1 |  |   |   |
| 47 | Alglucosidase Alfa | Myozyme    | 1 |   |   |  | 1 |   |
| 48 |                    |            |   |   |   |  |   |   |
| 49 |                    |            |   |   |   |  |   |   |
| 50 |                    |            |   |   |   |  |   |   |
| 51 | Rasagiline         | Azilect    |   | 1 | 1 |  |   |   |
| 52 | Ciclesonide        | Alvesco    |   | 1 | 1 |  |   |   |
| 53 |                    |            |   |   |   |  |   |   |
| 54 |                    |            |   |   |   |  |   |   |
| 55 |                    |            |   |   |   |  |   |   |
| 56 |                    |            |   |   |   |  |   |   |
| 57 |                    |            |   |   |   |  |   |   |
| 58 |                    |            |   |   |   |  |   |   |
| 59 |                    |            |   |   |   |  |   |   |
| 60 |                    |            |   |   |   |  |   |   |

|    |               |                    |   |   |   |
|----|---------------|--------------------|---|---|---|
| 1  |               |                    |   |   |   |
| 2  |               |                    |   |   |   |
| 3  | Tigecycline   | Tygalil            | 1 | 1 |   |
| 4  |               |                    |   |   |   |
| 5  | Natalizumab   | Tysabri            | 1 |   | 1 |
| 6  | Lanthanum     | Fosrenol           | 1 | 1 |   |
| 7  |               |                    |   |   |   |
| 8  |               |                    |   |   |   |
| 9  | Deferasirox   | Exjade             | 1 |   | 1 |
| 10 |               |                    |   |   | 1 |
| 11 | Gadofosveset  | Vasovist           | 1 | 1 |   |
| 12 | Telbivudine   | Sebivo             | 1 |   | 1 |
| 13 | Varenicline   | Champix            | 1 | 1 |   |
| 14 | Acamprosate   | Campral            | 1 | 1 |   |
| 15 | Dasatinib     | Sprycell           | 1 | 1 | 1 |
| 16 | Posaconazole  | Spriafil (Posanol) | 1 |   | 1 |
| 17 |               |                    |   |   |   |
| 18 | Micafungin    | Mycamine           | 1 | 1 |   |
| 19 |               |                    |   |   |   |
| 20 | Sitaxentan    | Thelin             | 1 | 1 |   |
| 21 | Idursulfase   | Elaprase           | 1 |   | 1 |
| 22 |               |                    |   |   |   |
| 23 | Oxaliplatin   | Eloxatin           | 1 |   | 1 |
| 24 | Ranibizumab   | Lucentis           | 1 |   | 1 |
| 25 | Fluticasone   | Avamys             | 1 | 1 |   |
| 26 |               |                    |   |   |   |
| 27 | Aprepitant    | Emend              | 1 | 1 |   |
| 28 |               |                    |   |   |   |
| 29 | Maraviroc     | Celsentri          | 1 |   | 1 |
| 30 | Daptomycin    | Cubicin            | 1 | 1 |   |
| 31 |               |                    |   |   |   |
| 32 | Paliperidone  | Invega             | 1 | 1 |   |
| 33 | Duloxetine    | Cymbalta           | 1 | 1 |   |
| 34 | Nesiritide    | Natrecor           | 1 | 1 | 1 |
| 35 | Aliskiren     | Rasilez            | 1 | 1 |   |
| 36 |               |                    |   |   |   |
| 37 | Anidulafungin | Eraxis             | 1 | 1 |   |
| 38 |               |                    |   |   |   |
| 39 | Raltegravir   | Isentress          | 1 |   | 1 |
| 40 | Rivastigmine  | Exelon patch       | 1 | 1 | 1 |
| 41 | Sitagliptin   | Januvia            | 1 | 1 |   |
| 42 | Temsirolimus  | Torisel            | 1 |   | 1 |
| 43 | Lenalidomide  | Revlimid           | 1 | 1 | 1 |
| 44 | Ambrisentan   | Volibris           | 1 | 1 |   |
| 45 | Etravirine    | Intence            | 1 |   | 1 |
| 46 |               |                    |   |   |   |
| 47 |               |                    |   |   |   |
| 48 |               |                    |   |   |   |
| 49 |               |                    |   |   |   |
| 50 |               |                    |   |   |   |
| 51 |               |                    |   |   |   |
| 52 |               |                    |   |   |   |
| 53 |               |                    |   |   |   |
| 54 |               |                    |   |   |   |
| 55 |               |                    |   |   |   |
| 56 |               |                    |   |   |   |
| 57 |               |                    |   |   |   |
| 58 |               |                    |   |   |   |
| 59 |               |                    |   |   |   |
| 60 |               |                    |   |   |   |

|    |                  |           |   |   |   |   |
|----|------------------|-----------|---|---|---|---|
| 1  |                  |           |   |   |   |   |
| 2  |                  |           |   |   |   |   |
| 3  | Methylalntrexone | Relistor  | 1 |   | 1 |   |
| 4  | Panitumumab      | Vectibix  |   | 1 | 1 | 1 |
| 5  | Nepafenac        | Nevanac   |   | 1 | 1 |   |
| 6  | Dabigatran       | Pradaxa   |   | 1 | 1 |   |
| 7  | Ceftobiprole     | Zeftera   |   | 1 | 1 |   |
| 8  |                  |           |   |   |   |   |
| 9  |                  |           |   |   |   |   |
| 10 |                  |           |   |   |   |   |
| 11 | Idebenone        | Catena    |   | 1 | 1 | 1 |
| 12 | Nilotinib        | Tasigna   |   | 1 | 1 | 1 |
| 13 | Rivaroxaban      | Xarelto   |   | 1 | 1 |   |
| 14 | Olmesartan       | Olmetec   |   | 1 | 1 |   |
| 15 |                  |           |   |   |   |   |
| 16 |                  |           |   |   |   |   |
| 17 | Capsular         | Synflorix |   | 1 | 1 |   |
| 18 | polysaccharide   |           |   |   |   |   |
| 19 | Ustekinumab      | Stelara   |   | 1 | 1 |   |
| 20 | Loteprednol      | Alrex     |   | 1 | 1 |   |
| 21 | Eculizumab       | Soliris   |   | 1 |   | 1 |
| 22 | Desvenlafaxine   | Pristiq   |   | 1 | 1 |   |
| 23 | Lisdexamfetamine | Vyvanse   |   | 1 | 1 |   |
| 24 |                  |           |   |   |   |   |
| 25 |                  |           |   |   |   |   |
| 26 |                  |           |   |   |   |   |
| 27 | Romiplostim      | Nplate    |   | 1 |   | 1 |
| 28 | Methyl           | Metvix    |   | 1 | 1 |   |
| 29 | aminolevulinate  |           |   |   |   |   |
| 30 |                  |           |   |   |   |   |
| 31 | Eplerenone       | Inspra    |   | 1 | 1 |   |
| 32 | Fosaprepitant    | Emend IV  |   | 1 | 1 |   |
| 33 | Golimumab        | Simponi   |   | 1 | 1 |   |
| 34 | Lapatinib        | Tykerb    |   | 1 | 1 |   |
| 35 | Vorinostat       | Zolinza   |   | 1 | 1 |   |
| 36 | Aripiprazole     | Abilify   |   | 1 | 1 |   |
| 37 | Clofarabine      | Clolar    |   | 1 | 1 |   |
| 38 | Dronedarone      | Multaq    |   | 1 |   | 1 |
| 39 | Certolizumab     | Cimzia    |   | 1 | 1 |   |
| 40 | Doripenem        | Doribax   |   | 1 | 1 |   |
| 41 |                  |           |   |   |   |   |
| 42 |                  |           |   |   |   |   |
| 43 |                  |           |   |   |   |   |
| 44 | Aztreonam        | Cayston   |   | 1 |   | 1 |
| 45 |                  |           |   |   |   |   |
| 46 |                  |           |   |   |   |   |
| 47 | Saxagliptin      | Onglyza   |   | 1 | 1 |   |
| 48 | Besifloxacin     | Besivance |   | 1 | 1 |   |
| 49 | Azacitidine      | Vidaza    |   | 1 |   | 1 |
| 50 | Japanese         | Ixiaro    |   | 1 | 1 |   |
| 51 | encephalitis     |           |   |   |   |   |
| 52 | vaccine          |           |   |   |   |   |
| 53 |                  |           |   |   |   |   |
| 54 | Alitretinoin     | Toctino   |   | 1 | 1 |   |
| 55 | Degarelix        | Firmagon  |   | 1 | 1 |   |
| 56 |                  |           |   |   |   |   |
| 57 |                  |           |   |   |   |   |
| 58 |                  |           |   |   |   |   |
| 59 |                  |           |   |   |   |   |
| 60 |                  |           |   |   |   |   |

|    |                    |                  |   |   |   |
|----|--------------------|------------------|---|---|---|
| 1  |                    |                  |   |   |   |
| 2  |                    |                  |   |   |   |
| 3  | Dexmedetomidine    | Precedex         | 1 | 1 |   |
| 4  | Everolimus         | Afinitor         | 1 | 1 | 1 |
| 5  | Thrombin alfa      | Recothrom        | 1 | 1 |   |
| 6  | Pneumococcal       | Prevnar          | 1 |   | 1 |
| 7  | conjugate          |                  |   |   |   |
| 8  | Gadoxetate         | Primovist        | 1 | 1 |   |
| 9  | Recombinant        | Cervarix         | 1 | 1 |   |
| 10 | human              |                  |   |   |   |
| 11 | papillomavirus     |                  |   |   |   |
| 12 | Canakinumab        | Ilaris           | 1 |   | 1 |
| 13 | Prasugrel          | Effient          | 1 | 1 |   |
| 14 | Tocilizumab        | Actemra          | 1 | 1 |   |
| 15 | Sapropterin        | Kuvan            | 1 |   | 1 |
| 16 |                    |                  |   |   |   |
| 17 | Trabectedin        | Yondelis         | 1 | 1 |   |
| 18 | Liraglutide        | Victoza - 1.2 mg | 1 | 1 |   |
| 19 |                    | pen-injector     |   |   |   |
| 20 | Meningococcal      | Menveo           | 1 | 1 |   |
| 21 | oligosaccharides   |                  |   |   |   |
| 22 | conjugated         |                  |   |   |   |
| 23 | Pazopanib          | Votrient         | 1 | 1 |   |
| 24 | Paliperidone       | Invega sustenna  | 1 | 1 |   |
| 25 | Sevelamer          | Renvela          | 1 | 1 |   |
| 26 |                    |                  |   |   |   |
| 27 | Dexlansoprazole    | Dexilant         | 1 | 1 |   |
| 28 |                    |                  |   |   |   |
| 29 | Denosumab          | Prolia           | 1 | 1 |   |
| 30 |                    |                  |   |   |   |
| 31 | Febuxostat         | Uloric           | 1 | 1 |   |
| 32 | Lacosamide         | Vimpat           | 1 | 1 |   |
| 33 | Velaglucerase alfa | VPRIV            | 1 | 1 |   |
| 34 |                    |                  |   |   |   |
| 35 | Roflumilast        | Daxas            | 1 | 1 |   |
| 36 |                    |                  |   |   |   |
| 37 | Tapentadol         | Nucynta CR       | 1 | 1 |   |
| 38 | Silodosin          | Rapaflo          | 1 | 1 |   |
| 39 | Eltrombopag        | Revolade         | 1 | 1 |   |
| 40 | Exenatide          | Byetta           | 1 | 1 |   |
| 41 | Fingolimod         | Gilenya          | 1 | 1 |   |
| 42 | Ticagrelor         | Brilinta         | 1 |   | 1 |
| 43 | Cabazitaxel        | Jevtana          | 1 | 1 |   |
| 44 | Rufinamide         | Banzel           | 1 | 1 |   |
| 45 | Belimumab          | Benlysta         | 1 | 1 |   |
| 46 |                    |                  |   |   |   |
| 47 |                    |                  |   |   |   |
| 48 |                    |                  |   |   |   |
| 49 |                    |                  |   |   |   |
| 50 |                    |                  |   |   |   |
| 51 |                    |                  |   |   |   |
| 52 |                    |                  |   |   |   |
| 53 |                    |                  |   |   |   |
| 54 |                    |                  |   |   |   |
| 55 |                    |                  |   |   |   |
| 56 |                    |                  |   |   |   |
| 57 |                    |                  |   |   |   |
| 58 |                    |                  |   |   |   |
| 59 |                    |                  |   |   |   |
| 60 |                    |                  |   |   |   |

|    |                     |                   |   |   |   |
|----|---------------------|-------------------|---|---|---|
| 1  |                     |                   |   |   |   |
| 2  |                     |                   |   |   |   |
| 3  | Rilpivirine         | Edurant           | 1 | 1 |   |
| 4  | Tolvaptan           | Samsca            | 1 | 1 |   |
| 5  | Abiraterone         | Zytiga            | 1 |   | 1 |
| 6  | Linagliptin         | Trajenta          | 1 | 1 |   |
| 7  | Boceprevir          | Victrelis         | 1 |   | 1 |
| 8  | Boceprevir,         | Victrelis Triple  | 1 |   | 1 |
| 9  | peginterferon alfa- |                   |   |   |   |
| 10 | 2b, ribavirin       |                   |   |   |   |
| 11 | Telaprevir          | Incivek           | 1 |   | 1 |
| 12 | Colesevelam         | Lodalis           | 1 | 1 |   |
| 13 | Senapine            | Saphris           | 1 | 1 |   |
| 14 | Dienogest           | Visanne           | 1 | 1 |   |
| 15 |                     |                   |   |   |   |
| 16 |                     |                   |   |   |   |
| 17 | Indacaterol         | Onbrez breezhaler | 1 | 1 |   |
| 18 |                     |                   |   |   |   |
| 19 | Prucalopride        | Resotran          | 1 | 1 |   |
| 20 | Plerixafor          | Mozobil           | 1 | 1 |   |
| 21 | Eribulin            | Halaven           | 1 | 1 |   |
| 22 | Apixaban            | Eliquis           | 1 | 1 |   |
| 23 | Vandetanib          | Caprelsa          | 1 | 1 |   |
| 24 | Ipilimumab          | Yervoy            | 1 | 1 |   |
| 25 | Fesoterodine        | Toviaz            | 1 | 1 |   |
| 26 | Fampridine          | Fampyra           | 1 | 1 |   |
| 27 | Vemurafenib         | Zelboraf          | 1 |   | 1 |
| 28 | Azilsartan          | Edarbi            | 1 | 1 |   |
| 29 |                     |                   |   |   |   |
| 30 | Ofatumumab          | Arzerra           | 1 | 1 |   |
| 31 | Palonosetron        | Aloxi             | 1 | 1 |   |
| 32 |                     |                   |   |   |   |
| 33 | Crizotinib          | Xalkori           | 1 | 1 | 1 |
| 34 | Fidaxomicin         | Dificid           | 1 | 1 |   |
| 35 |                     |                   |   |   |   |
| 36 |                     |                   |   |   |   |
| 37 | Lurasidone          | Latuda            | 1 | 1 |   |
| 38 | Ruxolitinib         | Jakavi            | 1 |   | 1 |
| 39 | Collagenase         | Xiaflex           | 1 | 1 |   |
| 40 | clostridium         |                   |   |   |   |
| 41 | histolyticum        |                   |   |   |   |
| 42 | Axitinib            | Inlyta            | 1 | 1 |   |
| 43 | Catridecacog        | Tretten           | 1 |   | 1 |
| 44 | Bendamustine        | Treanda           | 1 | 1 |   |
| 45 | Pirfenidone         | Esbriet           | 1 |   | 1 |
| 46 |                     |                   |   |   |   |
| 47 |                     |                   |   |   |   |
| 48 |                     |                   |   |   |   |
| 49 |                     |                   |   |   |   |
| 50 |                     |                   |   |   |   |
| 51 |                     |                   |   |   |   |
| 52 |                     |                   |   |   |   |
| 53 |                     |                   |   |   |   |
| 54 |                     |                   |   |   |   |
| 55 |                     |                   |   |   |   |
| 56 |                     |                   |   |   |   |
| 57 |                     |                   |   |   |   |
| 58 |                     |                   |   |   |   |
| 59 |                     |                   |   |   |   |
| 60 |                     |                   |   |   |   |

|    |                  |                 |   |   |   |
|----|------------------|-----------------|---|---|---|
| 1  |                  |                 |   |   |   |
| 2  |                  |                 |   |   |   |
| 3  | Elvitegravir,    | Stribild        |   | 1 | 1 |
| 4  | emtricitabine,   |                 |   |   |   |
| 5  | tenofovir,       |                 |   |   |   |
| 6  | Ivacaftor        | Kalydeco        | 1 |   | 1 |
| 7  |                  |                 |   |   |   |
| 8  |                  |                 |   |   |   |
| 9  | Stiripentol      | Diacomit        |   | 1 | 1 |
| 10 | Nebivolol        | Bystolic        |   | 1 | 1 |
| 11 | Ingenol          | Picato          |   | 1 | 1 |
| 12 |                  |                 |   |   |   |
| 13 |                  |                 |   |   |   |
| 14 |                  |                 |   |   |   |
| 15 | Brentuximab      | Adcetris        |   | 1 | 1 |
| 16 | Meningococcal    | Nimenrix        |   | 1 | 1 |
| 17 | polysaccharide   |                 |   |   |   |
| 18 | groups A,C,W-135 |                 |   |   |   |
| 19 | & Y conjugate    |                 |   |   |   |
| 20 | vaccine, Tetanus |                 |   |   | 1 |
| 21 | toxoid           |                 |   |   |   |
| 22 | Mirabegron       | Myrbetriq       |   | 1 | 1 |
| 23 | Regorafenib      | Stivarga        |   | 1 | 1 |
| 24 | Rotigotine       | Neupro          |   | 1 | 1 |
| 25 | Dimethyl         | Tecfidera       |   | 1 | 1 |
| 26 | Perampanel       | Fycompa         |   | 1 | 1 |
| 27 | Pertuzumab       | Perjeta         | 1 |   | 1 |
| 28 | Enzalutamide     | Xtandi          |   | 1 | 1 |
| 29 | Ulipristal       | Fibristal       |   | 1 | 1 |
| 30 |                  |                 |   |   |   |
| 31 |                  |                 |   |   |   |
| 32 | Vismodegib       | Erivedge        |   | 1 | 1 |
| 33 | Dabrafenib       | Tafinlar        |   | 1 | 1 |
| 34 | Trametinib       | Mekinist        |   | 1 | 1 |
| 35 | Fluticasone and  | Breo ellipta    |   | 1 | 1 |
| 36 | vilatnerol       |                 |   |   |   |
| 37 | Aclidinium       | Tudorza genuair |   | 1 | 1 |
| 38 |                  |                 |   |   |   |
| 39 | Rifaximin        | Zaxine          |   | 1 | 1 |
| 40 |                  |                 |   |   |   |
| 41 | Ocriplasmin      | Jetrea          | 1 |   | 1 |
| 42 | Trastuzumab      | Kadcyla         |   | 1 | 1 |
| 43 | emtansine        |                 |   |   |   |
| 44 | Galsulfase       | Naglazyme       | 1 |   | 1 |
| 45 |                  |                 |   |   |   |
| 46 | Riociguat        | Adempas         |   | 1 | 1 |
| 47 |                  |                 |   |   |   |
| 48 |                  |                 |   |   |   |
| 49 |                  |                 |   |   |   |
| 50 |                  |                 |   |   |   |
| 51 |                  |                 |   |   |   |
| 52 |                  |                 |   |   |   |
| 53 |                  |                 |   |   |   |
| 54 |                  |                 |   |   |   |
| 55 |                  |                 |   |   |   |
| 56 |                  |                 |   |   |   |
| 57 |                  |                 |   |   |   |
| 58 |                  |                 |   |   |   |
| 59 |                  |                 |   |   |   |
| 60 |                  |                 |   |   |   |

|    |                                                            |               |   |   |   |
|----|------------------------------------------------------------|---------------|---|---|---|
| 1  |                                                            |               |   |   |   |
| 2  |                                                            |               |   |   |   |
| 3  | Pasireotide                                                | Signifor      | 1 | 1 |   |
| 4  |                                                            |               |   |   |   |
| 5  |                                                            |               |   |   |   |
| 6  | Efinaconazole                                              | Jublia        | 1 | 1 |   |
| 7  | Romidepsin                                                 | Istodax       | 1 | 1 | 1 |
| 8  | Dolutegravir                                               | Tivicay       | 1 | 1 |   |
| 9  | Afatinib                                                   | Giotrif       | 1 | 1 |   |
| 10 | Macitentan                                                 | Opsumit       | 1 | 1 |   |
| 11 | Aflibercept                                                | Eylea         | 1 | 1 |   |
| 12 | Teriflunomide                                              | Aubagio       | 1 | 1 |   |
| 13 | Simeprevir                                                 | Galexos       | 1 |   | 1 |
| 14 | Alogliptin                                                 | Nesina        | 1 | 1 |   |
| 15 | Linaclotide                                                | Constella     | 1 | 1 |   |
| 16 | Multicomponent                                             | Bexsero       | 1 | 1 |   |
| 17 | meningococcal B                                            |               |   |   |   |
| 18 | vacine                                                     |               |   |   |   |
| 19 | Radium-223 dichloride                                      | Xofigo        | 1 | 1 |   |
| 20 |                                                            |               |   |   |   |
| 21 |                                                            |               |   |   |   |
| 22 | Sofosbuvir                                                 | Sovaldi       | 1 |   | 1 |
| 23 | Umeclidinium and vilanterol                                | Anoro ellipta | 1 | 1 |   |
| 24 |                                                            |               |   |   |   |
| 25 | Pomalidomide                                               | Pomalyst      | 1 |   | 1 |
| 26 | Lomitapide                                                 | Juxtapid      | 1 | 1 |   |
| 27 | Aflibercept                                                | Zaltrap       | 1 | 1 |   |
| 28 | Bosutinibs                                                 | Bosulif       | 1 | 1 | 1 |
| 29 | Recombinant human coagulation Factor IX, FC fusion protein | Alprolix      | 1 | 1 |   |
| 30 |                                                            |               |   |   |   |
| 31 | Tofacitinib                                                | Xeljanz       | 1 | 1 |   |
| 32 | Tesamorelin                                                | Egrifta       | 1 | 1 |   |
| 33 |                                                            |               |   |   |   |
| 34 | Canagliflozin                                              | Invokana      | 1 | 1 |   |
| 35 | Taliglucerase Alfa                                         | Elelyso       | 1 | 1 |   |
| 36 |                                                            |               |   |   |   |
| 37 | Eslicarbazepine                                            | Aptiom        | 1 | 1 |   |
| 38 | Antihemophilic factor, FC fusion protein                   | Eloctate      | 1 | 1 |   |
| 39 |                                                            |               |   |   |   |
| 40 | Ledipasvir and sofosbuvir                                  | Harvoni       | 1 |   | 1 |
| 41 |                                                            |               |   |   |   |
| 42 | Vortioxetine                                               | Trintellix    | 1 | 1 |   |
| 43 | Simoctocog alfa                                            | Nuwiq         | 1 | 1 |   |
| 44 |                                                            |               |   |   |   |
| 45 |                                                            |               |   |   |   |
| 46 |                                                            |               |   |   |   |
| 47 |                                                            |               |   |   |   |
| 48 |                                                            |               |   |   |   |
| 49 |                                                            |               |   |   |   |
| 50 |                                                            |               |   |   |   |
| 51 |                                                            |               |   |   |   |
| 52 |                                                            |               |   |   |   |
| 53 |                                                            |               |   |   |   |
| 54 |                                                            |               |   |   |   |
| 55 |                                                            |               |   |   |   |
| 56 |                                                            |               |   |   |   |
| 57 |                                                            |               |   |   |   |
| 58 |                                                            |               |   |   |   |
| 59 |                                                            |               |   |   |   |
| 60 |                                                            |               |   |   |   |

|    |                  |             |   |   |   |   |
|----|------------------|-------------|---|---|---|---|
| 1  |                  |             |   |   |   |   |
| 2  |                  |             |   |   |   |   |
| 3  | Azelastine and   | Dymista     |   | 1 | 1 |   |
| 4  | fluticasone      |             |   |   |   |   |
| 5  | Conjugated       | Duavive     |   | 1 | 1 |   |
| 6  | estrogens and    |             |   |   |   |   |
| 7  | bazedoxifene     |             |   |   |   |   |
| 8  | acetate          |             |   |   |   |   |
| 9  | Apremilast       | Otezla      |   | 1 | 1 |   |
| 10 | Ibrutinib        | Imbruvica   | 1 |   |   | 1 |
| 11 | Obinutuzumab     | Gazyva      | 1 |   | 1 | 1 |
| 12 | Siltuximab       | Sylvant     |   | 1 |   | 1 |
| 13 | Dapagliflozin    | Forxiga     |   | 1 | 1 |   |
| 14 | Ritonavir,       | Holkira Pak |   | 1 |   | 1 |
| 15 | paritaprevir,    |             |   |   |   |   |
| 16 | ombitasvir,      |             |   |   |   |   |
| 17 | dasabuvir        |             |   |   |   |   |
| 18 | Sodium           | Pheburane   |   | 1 |   | 1 |
| 19 | phenylbutyrate   |             |   |   |   |   |
| 20 | Vedolizumab      | Entyvio     |   | 1 | 1 |   |
| 21 | Human            | Gardasil 9  |   | 1 | 1 |   |
| 22 | papillomavirus 9 |             |   |   |   |   |
| 23 | valent vaccine,  |             |   |   |   |   |
| 24 | recombinant      |             |   |   |   |   |
| 25 | Deferiprone      | Ferriprox   |   | 1 | 1 |   |
| 26 |                  |             |   |   |   |   |
| 27 | Secukinumab      | Cosentyx    |   | 1 | 1 |   |
| 28 | Tedizolid        | Sivextro    |   | 1 | 1 |   |
| 29 |                  |             |   |   |   |   |
| 30 | Idelalisib       | Zydelig     |   | 1 | 1 | 1 |
| 31 | Ceritinib        | Zykadia     |   | 1 | 1 | 1 |
| 32 | Ponatinib        | Iclusig     |   | 1 | 1 | 1 |
| 33 | Carglumic Acid   | Carbaglu    | 1 |   |   | 1 |
| 34 |                  |             |   |   |   |   |
| 35 | Ivermectin       | Rosiver     |   | 1 | 1 |   |
| 36 | Levomilnacipran  | Fetzima     |   | 1 | 1 |   |
| 37 | Pembrolizumab    | Keytruda    |   | 1 | 1 | 1 |
| 38 | Naloxegol        | Movantik    |   | 1 | 1 |   |
| 39 | Nintedanib       | Ofev        |   | 1 | 1 |   |
| 40 | Ramucirumab      | Cyramza     |   | 1 | 1 |   |
| 41 | Empagliflozin    | Jardiance   |   | 1 | 1 |   |
| 42 | Mifepristone and | Mifegymiso  |   | 1 | 1 |   |
| 43 | Misoprostol      |             |   |   |   |   |
| 44 |                  |             |   |   |   |   |
| 45 | Daclatasvir      | Daklinza    |   | 1 | 1 | 1 |
| 46 |                  |             |   |   |   |   |
| 47 |                  |             |   |   |   |   |
| 48 |                  |             |   |   |   |   |
| 49 |                  |             |   |   |   |   |
| 50 |                  |             |   |   |   |   |
| 51 |                  |             |   |   |   |   |
| 52 |                  |             |   |   |   |   |
| 53 |                  |             |   |   |   |   |
| 54 |                  |             |   |   |   |   |
| 55 |                  |             |   |   |   |   |
| 56 |                  |             |   |   |   |   |
| 57 |                  |             |   |   |   |   |
| 58 |                  |             |   |   |   |   |
| 59 |                  |             |   |   |   |   |
| 60 |                  |             |   |   |   |   |



|    |                |           |   |   |   |   |
|----|----------------|-----------|---|---|---|---|
| 1  |                |           |   |   |   |   |
| 2  |                |           |   |   |   |   |
| 3  | Asfotase Alfa  | Strensiq  | 1 | 1 |   | 1 |
| 4  |                |           |   |   |   |   |
| 5  |                |           |   |   |   |   |
| 6  | Teduglutide    | Revestive |   | 1 | 1 |   |
| 7  |                |           |   |   |   |   |
| 8  | Evolocumab     | Repatha   |   | 1 | 1 |   |
| 9  | Nivolumab      | Opdivo    | 1 |   |   | 1 |
| 10 | Ceftolozane    | Zerbaxa   |   | 1 | 1 |   |
| 11 | Sulfate and    |           |   |   |   |   |
| 12 | Tazobactam     |           |   |   |   |   |
| 13 |                |           |   |   |   |   |
| 14 | Sacubitril,    | Entresto  | 1 |   |   | 1 |
| 15 | Valsartan      |           |   |   |   |   |
| 16 | Dulaglutide    | Trulicity |   | 1 | 1 |   |
| 17 | Elvitegravir,  | Genvoya   |   | 1 | 1 |   |
| 18 | Cobicistat,    |           |   |   |   |   |
| 19 | Emtricitabine, |           |   |   |   |   |
| 20 | Tenofovir      |           |   |   |   |   |
| 21 | Alafenamide    |           |   |   |   |   |
| 22 | Hemifumarate   |           |   |   |   |   |
| 23 | Mepolizumab    | Nucala    |   | 1 | 1 |   |
| 24 |                |           |   |   |   |   |
| 25 |                |           |   |   |   |   |
| 26 | Lenvatinib     | Lenvima   |   | 1 | 1 |   |
| 27 | Blinatumomab   | Blinicyto |   | 1 | 1 | 1 |
| 28 | Carfilzomib    | Kyprolis  |   | 1 |   | 1 |
| 29 | Elbasvir,      | Zepatier  |   | 1 |   | 1 |
| 30 | Grazoprevir    |           |   |   |   |   |
| 31 | Selexipag      | Uptravi   |   | 1 | 1 |   |
| 32 | Ivacaftor,     | Orkambi   |   | 1 |   | 1 |
| 33 | Lumacaftor     |           |   |   |   |   |
| 34 | Sugammadex     | Bridion   |   | 1 | 1 |   |
| 35 |                |           |   |   |   |   |
| 36 | Cobimetinib    | Cotellic  |   | 1 | 1 |   |
| 37 | Brivaracetam   | Brivlera  |   | 1 | 1 |   |
| 38 | Asunaprevir    | Sunvepra  |   | 1 | 1 |   |
| 39 | Palbociclib    | Ibrance   |   | 1 | 1 | 1 |
| 40 | Alirocumab     | Praluent  |   | 1 | 1 |   |
| 41 | Bilastine      | Blexten   |   | 1 | 1 |   |
| 42 |                |           |   |   |   |   |
| 43 |                |           |   |   |   |   |
| 44 | Idarucizumab   | Praxbind  |   | 1 | 1 | 1 |
| 45 |                |           |   |   |   |   |
| 46 | Olaparib       | Lynparza  |   | 1 | 1 | 1 |
| 47 | Ixekizumab     | Taltz     |   | 1 | 1 |   |
| 48 | Osimertinib    | Tagrisso  |   | 1 | 1 | 1 |
| 49 |                |           |   |   |   |   |
| 50 |                |           |   |   |   |   |
| 51 |                |           |   |   |   |   |
| 52 |                |           |   |   |   |   |
| 53 |                |           |   |   |   |   |
| 54 |                |           |   |   |   |   |
| 55 |                |           |   |   |   |   |
| 56 |                |           |   |   |   |   |
| 57 |                |           |   |   |   |   |
| 58 |                |           |   |   |   |   |
| 59 |                |           |   |   |   |   |
| 60 |                |           |   |   |   |   |

|    |                 |                |    |     |     |     |
|----|-----------------|----------------|----|-----|-----|-----|
| 1  |                 |                |    |     |     |     |
| 2  |                 |                |    |     |     |     |
| 3  | Sofosbuvir +    | Epclusa        |    | 1   |     | 1   |
| 4  | Velpatasvir     |                |    |     |     |     |
| 5  |                 |                |    |     |     |     |
| 6  | Ixazomib        | Ninlaro        |    | 1   |     | 1   |
| 7  | Nitisinone      | MDK-Nitisinone | 1  |     |     | 1   |
| 8  |                 |                |    |     |     |     |
| 9  | Venetoclax      | Venclexta      |    | 1   | 1   |     |
| 10 |                 |                |    |     |     | 1   |
| 11 | Edoxaban        | Lixiana        |    | 1   | 1   |     |
| 12 | Nitisinone      | Nitisinone     | 1  |     |     | 1   |
| 13 |                 |                |    |     |     |     |
| 14 | Daclizumab beta | Zinbryta       |    | 1   | 1   |     |
| 15 |                 |                |    |     |     |     |
| 16 | Nitisinone      | Orfadin        | 1  |     |     | 1   |
| 17 |                 |                |    |     |     |     |
| 18 | Ivabradine      | Lancora        |    | 1   | 1   |     |
| 19 |                 |                |    |     |     |     |
| 20 |                 |                | 55 | 454 | 379 | 130 |
| 21 |                 |                |    |     |     | 42  |

**\*Prescribe evaluations as of February 20, 2018; PMPRB evaluations as of December 31, 2016; Prescri**

1  
2  
3  
4  
5  
6  
7  
8  
9  
10  
11  
12  
13  
14  
15  
16  
17  
18  
19  
20  
21  
22  
23  
24  
25  
26  
27  
28  
29  
30  
31  
32  
33  
34  
35  
36  
37  
38  
39  
40  
41  
42  
43  
44  
45  
46  
47  
48  
49  
50  
51  
52  
53  
54  
55  
56  
57  
58  
59  
60

| <b>Notice of compliance or notice of compliance with</b> | <b>Small molecule</b> | <b>Biologic</b> | <b>ATC group (second level)</b>               |
|----------------------------------------------------------|-----------------------|-----------------|-----------------------------------------------|
| 1995-01-24                                               |                       |                 | anti-acne preparation                         |
| 1995-02-07                                               |                       |                 | all other therapeutic products                |
| 1995-02-07                                               |                       |                 | drugs for obstructive airway diseases         |
| 1995-03-23                                               |                       |                 | other nervous system                          |
| 1995-03-29                                               |                       |                 | antibacterials for systemic use               |
| 1995-04-24                                               |                       |                 | psycholeptics                                 |
| 1995-04-24                                               |                       |                 | psycholeptics                                 |
| 1995-04-24                                               |                       |                 | psycholeptics                                 |
| 1995-05-12                                               |                       |                 | drugs for acid related disorders              |
| 1995-06-02                                               |                       |                 | antibacterials for systemic use               |
| 1995-07-19                                               |                       |                 | immunostimulants                              |
| 1995-07-31                                               |                       |                 | antivirals for systemic use                   |
| 1995-08-22                                               |                       |                 | antibacterials for systemic use               |
| 1995-09-18                                               |                       |                 | anesthetics                                   |
| 1995-09-28                                               |                       |                 | agents acting on the renin-angiotensin system |
| 1995-10-04                                               |                       |                 | contrast media                                |
| 1995-11-02                                               |                       |                 | endocrine therapy                             |
| 1995-11-15                                               |                       |                 | drugs used in diabetes                        |
| 1995-11-15                                               |                       |                 | immunosuppressants                            |
| 1995-12-06                                               |                       |                 | immunosuppressants                            |
| 1995-12-08                                               |                       |                 | antivirals for systemic use                   |
| 1995-12-20                                               |                       |                 | drugs for treatment of bone disease           |
| 1996-03-26                                               |                       |                 | antivirals for systemic use                   |
| 1996-03-29                                               |                       |                 | vaccines                                      |
| 1996-04-25                                               |                       |                 | ophthalmologicals                             |
| 1996-04-25                                               |                       |                 | all other therapeutic products                |

1  
2  
3 1996-05-01 antivirals for systemic use  
4 1996-06-25 other gynecologicals  
5 1996-07-02 antibacterials for systemic  
6 use  
7  
8 1996-07-04 antithrombotic agents  
9 1996-08-01 endocrine therapy  
10 1996-08-14 antivirals for systemic use  
11 1996-09-12 antineoplastic agents  
12 1996-09-13 antivirals for systemic use  
13 1996-10-08 drugs used in diabetes  
14 1996-10-28 antibacterials for systemic  
15 use  
16 1996-10-28 psycholeptics  
17 1996-11-06 other nervous system  
18 1996-11-20 psycholeptics  
19 1996-12-03 anesthetics  
20 1996-12-23 antineoplastic agents  
21 1996-12-24 anesthetics  
22 1997-02-12 other alimentary tract and  
23 metabolism products  
24 1997-02-19 lipid modifying agents  
25 1997-03-06 antiepileptics  
26 1997-03-06 drugs for obstructive  
27 airway diseases  
28 1997-03-06 antithrombotic agents  
29 1997-03-21 antihemorrhagics  
30  
31 1997-04-15 antineoplastic agents  
32 1997-05-21 antiemetics and  
33 antinauseants  
34 1997-05-21 endocrine therapy  
35 1997-06-11 antihistamines for  
36 systemic use  
37 1997-06-16 ophthalmologicals  
38 1997-06-24 pituitary and hypothalamic  
39 hormones and analogues  
40 1997-07-02 sex hormones and  
41 modulators of the genital  
42 system  
43 1997-07-04 antineoplastic agents  
44 1997-08-12 psychoanaleptics  
45 1997-08-19 anti-parkinson drugs  
46  
47  
48  
49  
50  
51  
52  
53  
54  
55  
56  
57  
58  
59  
60

|    |            |                             |
|----|------------|-----------------------------|
| 1  |            |                             |
| 2  |            |                             |
| 3  | 1997-08-27 | drugs for treatment of      |
| 4  |            | bone disease                |
| 5  | 1997-09-04 | immunostimulants            |
| 6  |            |                             |
| 7  |            |                             |
| 8  | 1997-10-08 | anti-parkinson drugs        |
| 9  | 1997-10-21 | drugs for obstructive       |
| 10 |            | airway diseases             |
| 11 | 1997-11-03 | agents acting on the renin- |
| 12 |            | angiotensin system          |
| 13 | 1997-11-14 | antibacterials for systemic |
| 14 |            | use                         |
| 15 | 1997-11-24 | ophthalmologicals           |
| 16 |            |                             |
| 17 |            |                             |
| 18 | 1997-12-02 | psycholeptics               |
| 19 | 1998-01-29 | anti-parkinson drugs        |
| 20 | 1998-02-05 | immunostimulants            |
| 21 | 1998-02-16 | ophthalmologicals           |
| 22 |            |                             |
| 23 | 1998-02-18 | lipid modifying agents      |
| 24 | 1998-04-09 | antibacterials for systemic |
| 25 |            | use                         |
| 26 | 1998-04-28 | analgesics                  |
| 27 | 1998-04-28 | psychoanaleptics            |
| 28 | 1998-06-01 | agents acting on the renin- |
| 29 |            | angiotensin system          |
| 30 | 1998-06-01 | urologicals                 |
| 31 | 1998-06-17 | drugs for obstructive       |
| 32 |            | airway diseases             |
| 33 | 1998-07-22 | antivirals for systemic use |
| 34 | 1998-08-11 | antivirals for systemic use |
| 35 | 1998-08-24 | analgesics                  |
| 36 | 1998-08-31 | antineoplastic agents       |
| 37 | 1998-09-04 | antivirals for systemic use |
| 38 | 1998-10-07 | antithrombotic agents       |
| 39 | 1998-10-23 | ophthalmologicals           |
| 40 |            |                             |
| 41 | 1998-11-06 | sex hormones and            |
| 42 |            | modulators of the genital   |
| 43 |            | system                      |
| 44 | 1998-11-20 | agents acting on the renin- |
| 45 |            | angiotensin system          |
| 46 | 1998-11-20 | urologicals                 |
| 47 | 1998-12-02 | vaccines                    |
| 48 |            |                             |
| 49 |            |                             |
| 50 |            |                             |
| 51 |            |                             |
| 52 |            |                             |
| 53 |            |                             |
| 54 |            |                             |
| 55 |            |                             |
| 56 |            |                             |
| 57 |            |                             |
| 58 |            |                             |
| 59 |            |                             |
| 60 |            |                             |

1  
2  
3 1998-12-04 antibacterials for systemic  
4 use  
5  
6 1998-12-04 antibacterials for systemic  
7 use  
8 1998-12-30 preparations for wounds  
9 and ulcers  
10  
11 1999-01-25 muscle relaxants  
12 1999-02-02 antivirals for systemic use  
13 1999-02-05 psychoanaleptics  
14 1999-02-12 antihemorrhagics  
15  
16  
17 1999-02-26 psychoanaleptics  
18 1999-03-08 urologicals  
19 1999-03-11 immunostimulants  
20  
21  
22  
23  
24 1999-03-19 antivirals for systemic use  
25 1999-04-06 drugs used in diabetes  
26 1999-04-14 antiinflammatoary and  
27 antirheumatic products  
28  
29 1999-05-06 endocrine therapy  
30 1999-05-20 immunostimulants  
31 1999-06-03 antiobesity preparations  
32 1999-06-04 antivirals for systemic use  
33 1999-06-11 antithrombotic agents  
34 1999-07-09 agents acting on the renin-  
35 angiotensin system  
36 1999-07-13 antivirals for systemic use  
37 1999-07-16 analgesics  
38 1999-08-13 antineoplastic agents  
39 1999-08-16 agents acting on the renin-  
40 angiotensin system  
41 1999-08-18 drugs for treatment of  
42 bone disease  
43 1999-08-19 antithrombotic agents  
44 1999-09-17 blood substitutes and  
45 perfusion solutions  
46 1999-10-13 vaccines  
47  
48 1999-10-25 antineoplastic agents  
49 1999-10-25 antiinflammatoary and  
50 antirheumatic products  
51  
52  
53  
54  
55  
56  
57  
58  
59  
60

|    |            |   |                             |
|----|------------|---|-----------------------------|
| 1  |            |   |                             |
| 2  |            |   |                             |
| 3  | 1999-11-02 |   | antivirals for systemic use |
| 4  | 1999-11-04 |   | immunostimulants            |
| 5  |            |   |                             |
| 6  |            |   |                             |
| 7  | 1999-11-08 |   | contrast media              |
| 8  | 1999-12-10 |   | antibacterials for systemic |
| 9  |            |   | use                         |
| 10 |            |   |                             |
| 11 | 1999-12-23 |   | antivirals for systemic use |
| 12 | 2000-01-04 | 1 | antineoplastic agents       |
| 13 | 2000-03-16 | 1 | immunosuppressants          |
| 14 | 2000-03-17 | 1 | immunosuppressants          |
| 15 | 2000-03-21 | 1 | drugs used in diabetes      |
| 16 | 2000-04-13 | 1 | antiepileptics              |
| 17 | 2000-04-13 | 1 | psychoanaleptics            |
| 18 | 2000-05-11 | 1 | psycholeptics               |
| 19 | 2000-05-31 | 1 | ophthalmologicals           |
| 20 | 2000-06-30 | 1 | anti-parkinson drugs        |
| 21 | 2000-08-17 | 1 | endocrine therapy           |
| 22 | 2000-08-17 | 1 | drugs used in diabetes      |
| 23 | 2000-08-21 | 1 | drugs for treatment of      |
| 24 |            |   | bone disease                |
| 25 |            |   |                             |
| 26 | 2000-08-30 | 1 | other nervous system        |
| 27 | 2000-08-31 | 1 | antiinflammatory and        |
| 28 |            |   | antirheumatic products      |
| 29 |            |   |                             |
| 30 | 2000-09-01 | 1 | immunosuppressants          |
| 31 | 2000-10-19 | 1 | antibacterials for systemic |
| 32 |            |   | use                         |
| 33 |            |   |                             |
| 34 | 2000-10-20 | 1 | immunostimulants            |
| 35 |            |   |                             |
| 36 |            |   |                             |
| 37 |            |   |                             |
| 38 | 2000-12-01 | 1 | immunosuppressants          |
| 39 | 2000-12-11 | 1 | contrast media              |
| 40 | 2000-12-28 | 1 | antiobesity preparations    |
| 41 | 2001-01-05 | 1 | immunosuppressants          |
| 42 | 2001-01-09 | 1 | antibacterials for systemic |
| 43 |            |   | use                         |
| 44 |            |   |                             |
| 45 | 2001-01-11 | 1 | pancreatic hormones         |
| 46 |            |   |                             |
| 47 |            |   |                             |
| 48 | 2001-01-17 | 1 | other dermatological        |
| 49 |            |   | preparations                |
| 50 |            |   |                             |
| 51 | 2001-03-01 | 1 | antivirals for systemic use |
| 52 | 2001-03-09 | 1 | antivirals for systemic use |
| 53 | 2001-04-02 | 1 | antibacterials for systemic |
| 54 |            |   | use                         |
| 55 |            |   |                             |
| 56 | 2001-04-17 | 1 | antianemic preparations     |
| 57 |            |   |                             |
| 58 |            |   |                             |
| 59 |            |   |                             |
| 60 |            |   |                             |

|    |            |   |                             |
|----|------------|---|-----------------------------|
| 1  |            |   |                             |
| 2  |            |   |                             |
| 3  | 2001-04-30 | 1 | calcium homeostasis         |
| 4  | 2001-05-07 | 1 | drugs for acid related      |
| 5  |            |   | disorders                   |
| 6  |            |   |                             |
| 7  | 2001-05-08 | 1 | anti-parkinson drugs        |
| 8  | 2001-05-10 | 1 | antiprotozoals              |
| 9  | 2001-05-18 | 1 | psychoanaleptics            |
| 10 | 2001-05-29 | 1 | antihistamines for          |
| 11 |            |   | systemic use                |
| 12 |            |   |                             |
| 13 | 2001-06-06 | 1 | immunosuppressants          |
| 14 | 2001-07-29 | 1 | antimycotics for systemic   |
| 15 |            |   | use                         |
| 16 |            |   |                             |
| 17 | 2001-07-31 | 1 | psychoanaleptics            |
| 18 | 2001-08-17 | 1 | drugs for acid related      |
| 19 |            |   | disorders                   |
| 20 |            |   |                             |
| 21 | 2001-09-20 | 1 | antineoplastic agents       |
| 22 | 2001-10-17 | 1 | antithrombotic agents       |
| 23 | 2001-11-09 | 1 | ophthalmologicals           |
| 24 | 2001-11-30 | 1 | antihypertensives           |
| 25 | 2001-12-18 | 1 | vaccines                    |
| 26 |            |   |                             |
| 27 |            |   |                             |
| 28 |            |   |                             |
| 29 |            |   |                             |
| 30 |            |   |                             |
| 31 | 2002-01-25 | 1 | drugs used in diabetes      |
| 32 | 2002-02-13 | 1 | drugs used in diabetes      |
| 33 | 2002-02-21 |   | urologicals                 |
| 34 | 2002-03-12 | 1 | drugs for constipation      |
| 35 | 2002-05-01 | 1 | pituitary and hypothalamic  |
| 36 |            |   | hormones and analogues      |
| 37 |            |   |                             |
| 38 | 2002-05-03 | 1 | antivirals for systemic use |
| 39 | 2002-05-15 | 1 | immune sera and             |
| 40 |            |   | immunoglobulins             |
| 41 |            |   |                             |
| 42 | 2002-05-24 | 1 | antibiotics and             |
| 43 |            |   | chemotherapeutics for       |
| 44 |            |   | dermatological use          |
| 45 |            |   |                             |
| 46 | 2002-05-24 | 1 | ophthalmologicals           |
| 47 | 2002-05-24 | 1 | immunosuppressants          |
| 48 | 2002-05-28 | 1 | antihemorrhagics            |
| 49 | 2002-05-31 | 1 | immunostimulants            |
| 50 |            |   |                             |
| 51 |            |   |                             |
| 52 | 2002-06-13 | 1 | antithrombotic agents       |
| 53 | 2002-07-08 | 1 | blood substitutes and       |
| 54 |            |   | perfusion solutions         |
| 55 |            |   |                             |
| 56 | 2002-08-02 | 1 | antianemic preparations     |
| 57 |            |   |                             |
| 58 |            |   |                             |
| 59 |            |   |                             |
| 60 |            |   |                             |



|    |            |   |                             |
|----|------------|---|-----------------------------|
| 1  |            |   |                             |
| 2  |            |   |                             |
| 3  | 2002-08-20 | 1 | sex hormones and            |
| 4  |            |   | modulators of the genital   |
| 5  |            |   | system                      |
| 6  |            |   |                             |
| 7  | 2002-10-04 | 1 | antithrombotic agents       |
| 8  | 2002-10-09 | 1 | antithrombotic agents       |
| 9  | 2002-11-20 | 1 | drugs for obstructive       |
| 10 |            |   | airway diseases             |
| 11 |            |   |                             |
| 12 | 2002-12-11 | 1 | antiinflammatoary and       |
| 13 |            |   | antirheumatic products      |
| 14 | 2003-01-31 | 1 | antithrombotic agents       |
| 15 | 2003-02-18 | 1 | lipid modifying agents      |
| 16 | 2003-02-21 | 1 | vaccines                    |
| 17 |            |   |                             |
| 18 |            |   |                             |
| 19 |            |   |                             |
| 20 |            |   |                             |
| 21 | 2003-03-06 | 1 | antiepileptics              |
| 22 | 2003-03-18 | 1 | antivirals for systemic use |
| 23 | 2003-03-19 | 1 | other dermatological        |
| 24 |            |   | preparations                |
| 25 |            |   |                             |
| 26 | 2003-05-12 | 1 | antibacterials for systemic |
| 27 |            |   | use                         |
| 28 | 2003-05-12 | 1 | lipid modifying agents      |
| 29 | 2003-05-28 | 1 | antibacterials for systemic |
| 30 |            |   | use                         |
| 31 |            |   |                             |
| 32 | 2003-07-14 | 1 | antivirals for systemic use |
| 33 | 2003-07-22 | 1 | urologicals                 |
| 34 | 2003-08-13 | 1 | immunostimulants            |
| 35 |            |   |                             |
| 36 |            |   |                             |
| 37 | 2003-08-13 | 1 | pituitary and hypothalamic  |
| 38 |            |   | hormones and analogues      |
| 39 | 2003-08-27 | 1 | antivirals for systemic use |
| 40 | 2003-09-17 | 1 | urologicals                 |
| 41 | 2003-10-01 | 1 | agents acting on the renin- |
| 42 |            |   | angiotensin system          |
| 43 |            |   |                             |
| 44 | 2003-10-29 | 1 | all other therapeutic       |
| 45 |            |   | products                    |
| 46 |            |   |                             |
| 47 | 2003-12-05 | 1 | antivirals for systemic use |
| 48 | 2003-12-17 | 1 | antineoplastic agents       |
| 49 | 2004-01-23 | 1 | other alimentary tract and  |
| 50 |            |   | metabolism products         |
| 51 |            |   |                             |
| 52 | 2004-02-06 | 1 | other alimentary tract and  |
| 53 |            |   | metabolism products         |
| 54 | 2004-02-17 | 1 | endocrine therapy           |
| 55 |            |   |                             |
| 56 |            |   |                             |
| 57 |            |   |                             |
| 58 |            |   |                             |
| 59 |            |   |                             |
| 60 |            |   |                             |

|    |            |   |                              |
|----|------------|---|------------------------------|
| 1  |            |   |                              |
| 2  |            |   |                              |
| 3  | 2004-03-09 | 1 | antibacterials for systemic  |
| 4  |            |   | use                          |
| 5  |            |   |                              |
| 6  | 2004-03-12 |   | 1 immunostimulants           |
| 7  | 2004-03-17 | 1 | urologicals                  |
| 8  | 2004-03-31 | 1 | contrast media               |
| 9  | 2004-03-31 | 1 | other alimentary tract and   |
| 10 |            |   | metabolism products          |
| 11 |            |   |                              |
| 12 | 2004-04-16 |   | 1 muscle relaxants           |
| 13 |            |   |                              |
| 14 | 2004-05-10 |   | 1 immunostimulants           |
| 15 |            |   |                              |
| 16 |            |   |                              |
| 17 | 2004-05-11 | 1 | sex hormones and             |
| 18 |            |   | modulators of the genital    |
| 19 |            |   | system                       |
| 20 |            |   |                              |
| 21 | 2004-05-21 | 1 | antineoplastic agents        |
| 22 | 2004-05-31 |   | 1 other alimentary tract and |
| 23 |            |   | metabolism products          |
| 24 |            |   |                              |
| 25 | 2004-06-03 |   | 1 calcium homeostasis        |
| 26 | 2004-08-04 | 1 | calcium homeostasis          |
| 27 | 2004-08-05 | 1 | analgesics                   |
| 28 | 2004-08-20 | 1 | antimycotics for systemic    |
| 29 |            |   | use                          |
| 30 |            |   |                              |
| 31 | 2004-09-03 | 1 | analgesics                   |
| 32 | 2004-09-24 |   | 1 immunosuppressants         |
| 33 | 2004-10-06 |   | 1 immunosuppressants         |
| 34 | 2004-11-18 |   | 1 drugs for obstructive      |
| 35 |            |   | airway diseases              |
| 36 |            |   |                              |
| 37 | 2004-12-08 | 1 | psychoanaleptics             |
| 38 | 2004-12-10 | 1 | antivirals for systemic use  |
| 39 | 2004-12-10 | 1 | sex hormones and             |
| 40 |            |   | modulators of the genital    |
| 41 |            |   | system                       |
| 42 |            |   |                              |
| 43 | 2004-12-24 | 1 | psychoanaleptics             |
| 44 | 2004-12-24 | 1 | psychoanaleptics             |
| 45 | 2005-01-27 | 1 | antineoplastic agents        |
| 46 | 2005-03-31 | 1 | calcium homeostasis          |
| 47 | 2005-04-22 | 1 | drugs for acid related       |
| 48 |            |   | disorders                    |
| 49 |            |   |                              |
| 50 |            |   |                              |
| 51 | 2005-05-02 | 1 | ophthalmologicals            |
| 52 | 2005-05-10 |   | 1 therapeutic                |
| 53 |            |   | radiopharmaceuticals         |
| 54 | 2005-06-03 | 1 | antiepileptics               |
| 55 |            |   |                              |
| 56 |            |   |                              |
| 57 |            |   |                              |
| 58 |            |   |                              |
| 59 |            |   |                              |
| 60 |            |   |                              |

|    |            |   |                             |
|----|------------|---|-----------------------------|
| 1  |            |   |                             |
| 2  |            |   |                             |
| 3  | 2005-06-24 | 1 | sex hormones and            |
| 4  |            |   | modulators of the genital   |
| 5  |            |   | system                      |
| 6  |            |   |                             |
| 7  | 2005-07-07 | 1 | antineoplastic agents       |
| 8  | 2005-07-20 | 1 | analgesics                  |
| 9  | 2005-08-05 | 1 | other nervous system        |
| 10 |            |   |                             |
| 11 | 2005-08-23 | 1 | agents acting on the renin- |
| 12 |            |   | angiotensin system          |
| 13 | 2005-09-09 | 1 | antineoplastic agents       |
| 14 | 2005-09-09 | 1 | antineoplastic agents       |
| 15 | 2005-09-29 | 1 | drugs used in diabetes      |
| 16 | 2005-10-17 | 1 | pituitary and hypothalamic  |
| 17 |            |   | hormones and analogues      |
| 18 |            |   |                             |
| 19 | 2005-10-24 | 1 | immunosuppressants          |
| 20 | 2005-11-14 | 1 | urologicals                 |
| 21 | 2005-11-21 | 1 | antivirals for systemic use |
| 22 | 2005-11-21 | 1 | antivirals for systemic use |
| 23 | 2005-11-21 | 1 | antivirals for systemic use |
| 24 | 2005-11-30 | 1 | immunosuppressants          |
| 25 | 2005-12-09 | 1 | all other therapeutic       |
| 26 |            |   | products                    |
| 27 |            |   |                             |
| 28 | 2006-01-10 | 1 | urologicals                 |
| 29 | 2006-02-20 | 1 | urologicals                 |
| 30 | 2006-03-10 | 1 | endocrine therapy           |
| 31 | 2006-04-12 | 1 | drugs used in diabetes      |
| 32 | 2006-05-26 | 1 | antineoplastic agents       |
| 33 | 2006-06-16 | 1 | pituitary and hypothalamic  |
| 34 |            |   | hormones and analogues      |
| 35 |            |   |                             |
| 36 | 2006-06-29 | 1 | immunosuppressants          |
| 37 | 2006-07-10 | 1 | vaccines                    |
| 38 |            |   |                             |
| 39 |            |   |                             |
| 40 |            |   |                             |
| 41 |            |   |                             |
| 42 | 2006-07-17 | 1 | antivirals for systemic use |
| 43 |            |   |                             |
| 44 |            |   |                             |
| 45 | 2006-07-28 | 1 | antineoplastic agents       |
| 46 | 2006-07-28 | 1 | antivirals for systemic use |
| 47 | 2006-08-01 | 1 | vaccines                    |
| 48 | 2006-08-14 | 1 | other alimentary tract and  |
| 49 |            |   | metabolism products         |
| 50 |            |   |                             |
| 51 | 2006-08-17 | 1 | anti-parkinson drugs        |
| 52 | 2006-09-11 | 1 | drugs for obstructive       |
| 53 |            |   | airway diseases             |
| 54 |            |   |                             |
| 55 |            |   |                             |
| 56 |            |   |                             |
| 57 |            |   |                             |
| 58 |            |   |                             |
| 59 |            |   |                             |
| 60 |            |   |                             |

|    |            |   |                             |
|----|------------|---|-----------------------------|
| 1  |            |   |                             |
| 2  |            |   |                             |
| 3  | 2006-09-14 | 1 | antibacterials for systemic |
| 4  |            |   | use                         |
| 5  | 2006-09-28 | 1 | immunosuppressants          |
| 6  | 2006-10-17 | 1 | all other therapeutic       |
| 7  |            |   | products                    |
| 8  | 2006-10-18 | 1 | all other therapeutic       |
| 9  |            |   | products                    |
| 10 | 2006-10-31 | 1 | contrast media              |
| 11 | 2006-11-28 | 1 | antivirals for systemic use |
| 12 | 2007-01-24 | 1 | other nervous system        |
| 13 | 2007-03-16 | 1 | other nervous system        |
| 14 | 2007-03-26 | 1 | antineoplastic agents       |
| 15 | 2007-03-26 | 1 | antimycotics for systemic   |
| 16 |            |   | use                         |
| 17 | 2007-05-22 | 1 | antimycotics for systemic   |
| 18 |            |   | use                         |
| 19 | 2007-05-30 | 1 | antihypertensives           |
| 20 | 2007-06-13 | 1 | other alimentary tract and  |
| 21 |            |   | metabolism products         |
| 22 | 2007-06-15 | 1 | antineoplastic agents       |
| 23 | 2007-06-26 | 1 | ophthalmologicals           |
| 24 | 2007-08-14 | 1 | drugs for obstructive       |
| 25 |            |   | airway diseases             |
| 26 | 2007-08-24 | 1 | antiemetics and             |
| 27 |            |   | antinauseants               |
| 28 | 2007-09-21 | 1 | antivirals for systemic use |
| 29 | 2007-09-24 | 1 | antibacterials for systemic |
| 30 |            |   | use                         |
| 31 | 2007-09-26 | 1 | psycholeptics               |
| 32 | 2007-11-01 | 1 | psychoanaleptics            |
| 33 | 2007-11-08 | 1 | cardiac therapy             |
| 34 | 2007-11-14 | 1 | agents acting on the renin- |
| 35 |            |   | angiotensin system          |
| 36 | 2007-11-14 | 1 | antimycotics for systemic   |
| 37 |            |   | use                         |
| 38 | 2007-11-27 | 1 | antivirals for systemic use |
| 39 | 2007-11-29 | 1 | psychoanaleptics            |
| 40 | 2007-12-14 | 1 | drugs used in diabetes      |
| 41 | 2007-12-21 | 1 | antineoplastic agents       |
| 42 | 2008-01-17 | 1 | immunosuppressants          |
| 43 | 2008-03-20 | 1 | antihypertensives           |
| 44 | 2008-03-27 | 1 | antivirals for systemic use |
| 45 |            |   |                             |
| 46 |            |   |                             |
| 47 |            |   |                             |
| 48 |            |   |                             |
| 49 |            |   |                             |
| 50 |            |   |                             |
| 51 |            |   |                             |
| 52 |            |   |                             |
| 53 |            |   |                             |
| 54 |            |   |                             |
| 55 |            |   |                             |
| 56 |            |   |                             |
| 57 |            |   |                             |
| 58 |            |   |                             |
| 59 |            |   |                             |
| 60 |            |   |                             |

|    |            |   |                             |
|----|------------|---|-----------------------------|
| 1  |            |   |                             |
| 2  |            |   |                             |
| 3  | 2008-03-28 | 1 | drugs for constipation      |
| 4  | 2008-04-03 |   | 1 antineoplastic agents     |
| 5  | 2008-04-17 | 1 | ophthalmologicals           |
| 6  | 2008-06-10 | 1 | antithrombotic agents       |
| 7  | 2008-06-26 | 1 | antibacterials for systemic |
| 8  |            |   | use                         |
| 9  |            |   |                             |
| 10 |            |   |                             |
| 11 | 2008-07-23 | 1 | psychoanaleptics            |
| 12 | 2008-09-09 | 1 | antineoplastic agents       |
| 13 | 2008-09-15 | 1 | antithrombotic agents       |
| 14 | 2008-10-28 | 1 | agents acting on the renin- |
| 15 |            |   | angiotensin system          |
| 16 |            |   |                             |
| 17 | 2008-12-11 |   | 1 vaccines                  |
| 18 |            |   |                             |
| 19 |            |   |                             |
| 20 | 2008-12-12 |   | 1 immunosuppressants        |
| 21 | 2008-12-23 | 1 | ophthalmologicals           |
| 22 | 2009-01-28 |   | 1 immunosuppressants        |
| 23 | 2009-02-04 | 1 | psychoanaleptics            |
| 24 | 2009-02-19 | 1 | psychoanaleptics            |
| 25 |            |   |                             |
| 26 |            |   |                             |
| 27 | 2009-02-19 |   | 1 antihemorrhagics          |
| 28 | 2009-02-26 | 1 | antineoplastic agents       |
| 29 |            |   |                             |
| 30 |            |   |                             |
| 31 | 2009-02-26 | 1 | diuretics                   |
| 32 | 2009-04-01 | 1 | antivirals for systemic use |
| 33 | 2009-04-07 |   | 1 immunosuppressants        |
| 34 | 2009-05-15 | 1 | antineoplastic agents       |
| 35 | 2009-06-11 | 1 | antineoplastic agents       |
| 36 | 2009-07-09 | 1 | psycholeptics               |
| 37 | 2009-07-16 | 1 | antineoplastic agents       |
| 38 | 2009-08-11 | 1 | cardiac therapy             |
| 39 | 2009-08-12 |   | 1 immunosuppressants        |
| 40 | 2009-09-02 | 1 | antibacterials for systemic |
| 41 |            |   | use                         |
| 42 |            |   |                             |
| 43 | 2009-09-11 | 1 | antibacterials for systemic |
| 44 |            |   | use                         |
| 45 |            |   |                             |
| 46 | 2009-09-14 | 1 | drugs used in diabetes      |
| 47 | 2009-10-23 | 1 | ophthalmologicals           |
| 48 | 2009-10-23 | 1 | antineoplastic agents       |
| 49 | 2009-10-29 |   | 1 vaccines                  |
| 50 |            |   |                             |
| 51 |            |   |                             |
| 52 |            |   |                             |
| 53 |            |   |                             |
| 54 |            |   |                             |
| 55 | 2009-11-13 | 1 | antineoplastic agents       |
| 56 | 2009-11-16 | 1 | endocrine therapy           |
| 57 |            |   |                             |
| 58 |            |   |                             |
| 59 |            |   |                             |
| 60 |            |   |                             |

|    |            |   |                              |
|----|------------|---|------------------------------|
| 1  |            |   |                              |
| 2  |            |   |                              |
| 3  | 2009-12-09 | 1 | psycholeptics                |
| 4  | 2009-12-14 | 1 | antineoplastic agents        |
| 5  |            |   |                              |
| 6  | 2009-12-15 |   | 1 antihemorrhagics           |
| 7  | 2009-12-21 |   | 1 vaccines                   |
| 8  |            |   |                              |
| 9  |            |   |                              |
| 10 | 2010-01-14 | 1 | contrast media               |
| 11 | 2010-02-03 |   | 1 vaccines                   |
| 12 |            |   |                              |
| 13 |            |   |                              |
| 14 |            |   |                              |
| 15 | 2010-02-26 |   | 1 immunosuppressants         |
| 16 | 2010-04-16 | 1 | antithrombotic agents        |
| 17 | 2010-04-30 |   | 1 immunosuppressants         |
| 18 | 2010-04-30 | 1 | other alimentary tract and   |
| 19 |            |   | metabolism products          |
| 20 |            |   |                              |
| 21 | 2010-05-13 | 1 | antineoplastic agents        |
| 22 | 2010-05-21 |   | 1 drugs used in diabetes     |
| 23 |            |   |                              |
| 24 |            |   |                              |
| 25 | 2010-05-21 |   | 1 vaccines                   |
| 26 |            |   |                              |
| 27 |            |   |                              |
| 28 | 2010-05-27 | 1 | antineoplastic agents        |
| 29 | 2010-06-30 | 1 | psycholeptics                |
| 30 | 2010-07-07 | 1 | all other therapeutic        |
| 31 |            |   | products                     |
| 32 |            |   |                              |
| 33 | 2010-07-22 | 1 | drugs for acid related       |
| 34 |            |   | disorders                    |
| 35 |            |   |                              |
| 36 | 2010-08-06 |   | 1 drugs for treatment of     |
| 37 |            |   | bone disease                 |
| 38 | 2010-09-22 | 1 | antigout preparations        |
| 39 | 2010-09-30 | 1 | antiepileptics               |
| 40 |            |   |                              |
| 41 | 2010-10-01 |   | 1 other alimentary tract and |
| 42 |            |   | metabolism products          |
| 43 | 2010-11-23 | 1 | drugs for obstructive        |
| 44 |            |   | airway diseases              |
| 45 |            |   |                              |
| 46 | 2010-12-02 | 1 | analgesics                   |
| 47 | 2011-01-11 | 1 | urologicals                  |
| 48 | 2011-01-12 | 1 | antihemorrhagics             |
| 49 | 2011-01-13 | 1 | drugs used in diabetes       |
| 50 |            |   |                              |
| 51 | 2011-03-09 | 1 | immunosuppressants           |
| 52 | 2011-05-30 | 1 | antithrombotic agents        |
| 53 | 2011-06-16 | 1 | antineoplastic agents        |
| 54 | 2011-06-22 | 1 | antiepileptics               |
| 55 |            |   |                              |
| 56 | 2011-07-06 |   | 1 immunosuppressants         |
| 57 |            |   |                              |
| 58 |            |   |                              |
| 59 |            |   |                              |
| 60 |            |   |                              |

|    |            |   |                              |
|----|------------|---|------------------------------|
| 1  |            |   |                              |
| 2  |            |   |                              |
| 3  | 2011-07-21 | 1 | antivirals for systemic use  |
| 4  | 2011-07-25 | 1 | diuretics                    |
| 5  | 2011-07-27 | 1 | endocrine therapy            |
| 6  | 2011-07-28 | 1 | drugs used in diabetes       |
| 7  | 2011-07-29 | 1 | antivirals for systemic use  |
| 8  | 2011-08-10 | 1 | immunostimulants             |
| 9  |            |   |                              |
| 10 |            |   |                              |
| 11 |            |   |                              |
| 12 |            |   |                              |
| 13 | 2011-08-16 | 1 | antivirals for systemic use  |
| 14 | 2011-09-22 | 1 | lipid modifying agents       |
| 15 | 2011-10-07 | 1 | psycholeptics                |
| 16 | 2011-10-12 | 1 | sex hormones and             |
| 17 |            |   | modulators of the genital    |
| 18 |            |   | system                       |
| 19 |            |   |                              |
| 20 |            |   |                              |
| 21 | 2011-12-06 | 1 | drugs for obstructive        |
| 22 |            |   | airway diseases              |
| 23 | 2011-12-07 | 1 | drugs for constipation       |
| 24 | 2011-12-08 | 1 | immunostimulants             |
| 25 | 2011-12-14 | 1 | antineoplastic agents        |
| 26 | 2011-12-16 | 1 | antithrombotic agents        |
| 27 | 2012-01-12 | 1 | antineoplastic agents        |
| 28 | 2012-02-01 | 1 | antineoplastic agents        |
| 29 | 2012-02-09 | 1 | urologicals                  |
| 30 | 2012-02-10 | 1 | other nervous system         |
| 31 | 2012-02-15 |   | antineoplastic agents        |
| 32 | 2012-03-08 | 1 | agents acting on the renin-  |
| 33 |            |   | angiotensin system           |
| 34 | 2012-03-09 | 1 | antineoplastic agents        |
| 35 | 2012-03-14 | 1 | antiemetics and              |
| 36 |            |   | antinauseants                |
| 37 | 2012-04-25 | 1 | antineoplastic agents        |
| 38 | 2012-06-07 | 1 | antidiarrheals, intestinal   |
| 39 |            |   | antiinflammatory/antiinfec   |
| 40 |            |   | tive agents                  |
| 41 | 2012-06-13 | 1 | psycholeptics                |
| 42 | 2012-06-19 | 1 | antineoplastic agents        |
| 43 | 2012-07-05 | 1 | other drugs for disorders of |
| 44 |            |   | the musculo-skeletal         |
| 45 |            |   | system                       |
| 46 | 2012-07-12 | 1 | antineoplastic agents        |
| 47 | 2012-07-19 | 1 | antihemorrhagics             |
| 48 | 2012-08-24 | 1 | antineoplastic agents        |
| 49 | 2012-10-01 |   | immunosuppressants           |
| 50 |            |   |                              |
| 51 |            |   |                              |
| 52 |            |   |                              |
| 53 |            |   |                              |
| 54 |            |   |                              |
| 55 |            |   |                              |
| 56 |            |   |                              |
| 57 |            |   |                              |
| 58 |            |   |                              |
| 59 |            |   |                              |
| 60 |            |   |                              |

1  
2  
3  
4  
5  
6  
7  
8  
9  
10  
11  
12  
13  
14  
15  
16  
17  
18  
19  
20  
21  
22  
23  
24  
25  
26  
27  
28  
29  
30  
31  
32  
33  
34  
35  
36  
37  
38  
39  
40  
41  
42  
43  
44  
45  
46  
47  
48  
49  
50  
51  
52  
53  
54  
55  
56  
57  
58  
59  
60

|            |   |                                                                  |
|------------|---|------------------------------------------------------------------|
| 2012-11-26 | 1 | antivirals for systemic use                                      |
| 2012-11-26 | 1 | other respiratory system products                                |
| 2012-12-21 | 1 | antiepileptics                                                   |
| 2012-12-21 | 1 | beta blocking agents                                             |
| 2013-01-30 | 1 | antibiotics and chemotherapeutics for dermatological use         |
| 2013-02-01 | 1 | antineoplastic agents                                            |
| 2013-03-05 | 1 | vaccines                                                         |
| 2013-03-06 | 1 | urologicals                                                      |
| 2013-03-11 | 1 | antineoplastic agents                                            |
| 2013-03-21 | 1 | anti-parkinson drugs                                             |
| 2013-04-03 | 1 | other nervous system                                             |
| 2013-04-04 | 1 | antiepileptics                                                   |
| 2013-04-12 | 1 | antineoplastic agents                                            |
| 2013-05-29 | 1 | endocrine therapy                                                |
| 2013-06-24 | 1 | sex hormones and modulators of the genital system                |
| 2013-07-12 | 1 | antineoplastic agents                                            |
| 2013-07-16 | 1 | antineoplastic agents                                            |
| 2013-07-18 | 1 | antineoplastic agents                                            |
| 2013-07-23 | 1 | drugs for obstructive airway diseases                            |
| 2013-07-29 | 1 | drugs for obstructive airway diseases                            |
| 2013-08-13 | 1 | antidiarrheals, intestinal antiinflammatory/antiinfective agents |
| 2013-08-13 | 1 | ophthalmologicals                                                |
| 2013-09-11 | 1 | antineoplastic agents                                            |
| 2013-09-16 | 1 | other alimentary tract and metabolism products                   |
| 2013-09-19 | 1 | antihypertensives                                                |



|    |            |   |                             |
|----|------------|---|-----------------------------|
| 1  |            |   |                             |
| 2  |            |   |                             |
| 3  | 2013-09-23 | 1 | pituitary and hypothalamic  |
| 4  |            |   | hormones and analogues      |
| 5  |            |   |                             |
| 6  | 2013-10-02 | 1 | drugs used in diabetes      |
| 7  | 2013-10-16 | 1 | antineoplastic agents       |
| 8  | 2013-10-31 | 1 | antivirals for systemic use |
| 9  |            |   |                             |
| 10 | 2013-11-01 | 1 | antineoplastic agents       |
| 11 | 2013-11-06 | 1 | antihypertensives           |
| 12 | 2013-11-08 | 1 | antineoplastic agents       |
| 13 | 2013-11-14 | 1 | immunosuppressants          |
| 14 | 2013-11-18 | 1 | antivirals for systemic use |
| 15 | 2013-11-27 | 1 | drugs used in diabetes      |
| 16 | 2013-12-02 | 1 | drugs for constipation      |
| 17 | 2013-12-06 | 1 | vaccines                    |
| 18 |            |   |                             |
| 19 |            |   |                             |
| 20 |            |   |                             |
| 21 |            |   |                             |
| 22 | 2013-12-12 | 1 | therapeutic                 |
| 23 |            |   | radiopharmaceuticals        |
| 24 | 2013-12-13 | 1 | antivirals for systemic use |
| 25 | 2013-12-23 | 1 | drugs for obstructive       |
| 26 |            |   | airway diseases             |
| 27 |            |   |                             |
| 28 | 2014-01-20 | 1 | immunosuppressants          |
| 29 | 2014-02-04 | 1 | lipid modifying agents      |
| 30 | 2014-02-12 | 1 | antineoplastic agents       |
| 31 | 2014-03-14 | 1 | antineoplastic agents       |
| 32 | 2014-03-20 | 1 | antihemorrhagics            |
| 33 |            |   |                             |
| 34 |            |   |                             |
| 35 |            |   |                             |
| 36 |            |   |                             |
| 37 |            |   |                             |
| 38 | 2014-04-17 | 1 | immunosuppressants          |
| 39 | 2014-04-29 | 1 | pituitary and hypothalamic  |
| 40 |            |   | hormones and analogues      |
| 41 |            |   |                             |
| 42 | 2014-05-23 | 1 | drugs used in diabetes      |
| 43 | 2014-05-29 | 1 | other alimentary tract and  |
| 44 |            |   | metabolism products         |
| 45 |            |   |                             |
| 46 | 2014-07-08 | 1 | antiepileptics              |
| 47 | 2014-08-22 | 1 | antihemorrhagics            |
| 48 |            |   |                             |
| 49 |            |   |                             |
| 50 |            |   |                             |
| 51 | 2014-10-15 | 1 | antivirals for systemic use |
| 52 |            |   |                             |
| 53 | 2014-10-22 | 1 | psychoanaleptics            |
| 54 | 2014-10-23 | 1 | antihemorrhagics            |
| 55 |            |   |                             |
| 56 |            |   |                             |
| 57 |            |   |                             |
| 58 |            |   |                             |
| 59 |            |   |                             |
| 60 |            |   |                             |

|    |            |   |                             |
|----|------------|---|-----------------------------|
| 1  |            |   |                             |
| 2  |            |   |                             |
| 3  | 2014-10-23 | 1 | nasal preparations          |
| 4  |            |   |                             |
| 5  | 2014-10-23 | 1 | sex hormones and            |
| 6  |            |   | modulators of the genital   |
| 7  |            |   | system                      |
| 8  |            |   |                             |
| 9  |            |   |                             |
| 10 | 2014-11-12 | 1 | immunosuppressants          |
| 11 | 2014-11-17 | 1 | antineoplastic agents       |
| 12 |            |   |                             |
| 13 | 2014-11-25 | 1 | antineoplastic agents       |
| 14 |            |   |                             |
| 15 | 2014-12-03 | 1 | immunosuppressants          |
| 16 | 2014-12-12 | 1 | drugs used in diabetes      |
| 17 | 2014-12-22 | 1 | antivirals for systemic use |
| 18 |            |   |                             |
| 19 |            |   |                             |
| 20 |            |   |                             |
| 21 |            |   |                             |
| 22 | 2015-01-26 | 1 | other alimentary tract and  |
| 23 |            |   | metabolism products         |
| 24 | 2015-01-29 | 1 | immunosuppressants          |
| 25 |            |   |                             |
| 26 | 2015-02-05 | 1 | vaccines                    |
| 27 |            |   |                             |
| 28 |            |   |                             |
| 29 |            |   |                             |
| 30 |            |   |                             |
| 31 | 2015-02-13 | 1 | all other therapeutic       |
| 32 |            |   | products                    |
| 33 | 2015-02-27 | 1 | immunosuppressants          |
| 34 |            |   |                             |
| 35 | 2015-03-17 | 1 | antibacterials for systemic |
| 36 |            |   | use                         |
| 37 | 2015-03-27 | 1 | antineoplastic agents       |
| 38 | 2015-03-27 | 1 | antineoplastic agents       |
| 39 | 2015-04-02 | 1 | antineoplastic agents       |
| 40 | 2015-04-10 | 1 | other alimentary tract and  |
| 41 |            |   | metabolism products         |
| 42 |            |   |                             |
| 43 | 2015-04-22 | 1 | antihelmintics              |
| 44 | 2015-05-08 | 1 | psychoanaleptics            |
| 45 |            |   |                             |
| 46 | 2015-05-19 | 1 | antineoplastic agents       |
| 47 | 2015-06-02 | 1 | drugs for constipation      |
| 48 | 2015-06-25 | 1 | antineoplastic agents       |
| 49 |            |   |                             |
| 50 | 2015-07-16 | 1 | antineoplastic agents       |
| 51 | 2015-07-23 | 1 | drugs used in diabetes      |
| 52 | 2015-07-29 | 1 | sex hormones and            |
| 53 |            |   | modulators of the genital   |
| 54 |            |   | system                      |
| 55 |            |   |                             |
| 56 | 2015-08-13 | 1 | antivirals for systemic use |
| 57 |            |   |                             |
| 58 |            |   |                             |
| 59 |            |   |                             |
| 60 |            |   |                             |

|    |            |   |                             |
|----|------------|---|-----------------------------|
| 1  |            |   |                             |
| 2  |            |   |                             |
| 3  | 2015-08-14 | 1 | other alimentary tract and  |
| 4  |            |   | metabolism products         |
| 5  | 2015-09-04 | 1 | other alimentary tract and  |
| 6  |            |   | metabolism products         |
| 7  | 2015-09-10 | 1 | lipid modifying agents      |
| 8  | 2015-09-25 | 1 | antineoplastic agents       |
| 9  | 2015-09-30 | 1 | antibacterials for systemic |
| 10 |            |   | use                         |
| 11 |            |   |                             |
| 12 |            |   |                             |
| 13 |            |   |                             |
| 14 | 2015-10-02 | 1 | agents acting on the renin- |
| 15 |            |   | angiotensin system          |
| 16 | 2015-11-10 | 1 | drugs used in diabetes      |
| 17 | 2015-11-27 | 1 | antivirals for systemic use |
| 18 |            |   |                             |
| 19 |            |   |                             |
| 20 |            |   |                             |
| 21 |            |   |                             |
| 22 |            |   |                             |
| 23 |            |   |                             |
| 24 |            |   |                             |
| 25 |            |   |                             |
| 26 | 2015-12-03 | 1 | drugs for obstructive       |
| 27 |            |   | airway diseases             |
| 28 | 2015-12-22 | 1 | antineoplastic agents       |
| 29 | 2015-12-22 | 1 | antineoplastic agents       |
| 30 | 2016-01-15 | 1 | antineoplastic agents       |
| 31 | 2016-01-19 | 1 | antivirals for systemic use |
| 32 |            |   |                             |
| 33 |            |   |                             |
| 34 | 2016-01-20 | 1 | antithrombotic agents       |
| 35 | 2016-01-26 | 1 | other respiratory system    |
| 36 |            |   | products                    |
| 37 | 2016-02-05 | 1 | all other therapeutic       |
| 38 |            |   | products                    |
| 39 | 2016-02-22 | 1 | antineoplastic agents       |
| 40 | 2016-03-09 | 1 | antiepileptics              |
| 41 | 2016-03-09 | 1 | antivirals for systemic use |
| 42 | 2016-03-16 | 1 | antineoplastic agents       |
| 43 | 2016-04-11 | 1 | lipid modifying agents      |
| 44 | 2016-04-21 | 1 | antihistamines for          |
| 45 |            |   | systemic use                |
| 46 | 2016-04-29 | 1 | all other therapeutic       |
| 47 |            |   | products                    |
| 48 | 2016-04-29 | 1 | antineoplastic agents       |
| 49 | 2016-05-25 | 1 | immunosuppressants          |
| 50 | 2016-07-05 | 1 | antineoplastic agents       |
| 51 |            |   |                             |
| 52 |            |   |                             |
| 53 |            |   |                             |
| 54 |            |   |                             |
| 55 |            |   |                             |
| 56 |            |   |                             |
| 57 |            |   |                             |
| 58 |            |   |                             |
| 59 |            |   |                             |
| 60 |            |   |                             |

|    |            |     |                             |
|----|------------|-----|-----------------------------|
| 1  |            |     |                             |
| 2  |            |     |                             |
| 3  | 2016-07-11 | 1   | antivirals for systemic use |
| 4  |            |     |                             |
| 5  |            |     |                             |
| 6  | 2016-08-04 | 1   | antineoplastic agents       |
| 7  | 2016-09-20 | 1   | other alimentary tract and  |
| 8  |            |     | metabolism products         |
| 9  |            |     |                             |
| 10 | 2016-09-30 | 1   | antineoplastic agents       |
| 11 | 2016-11-04 | 1   | antithrombotic agents       |
| 12 | 2016-11-04 | 1   | other alimentary tract and  |
| 13 |            |     | metabolism products         |
| 14 | 2016-12-08 | 1   | immunosuppressants          |
| 15 |            |     |                             |
| 16 | 2016-12-13 | 1   | other alimentary tract and  |
| 17 |            |     | metabolism products         |
| 18 | 2016-12-23 | 1   | cardiac therapy             |
| 19 |            | 286 | 99                          |
| 20 |            |     |                             |

**e ratings - offers an advantage, possibly helpful, nothing new,**

**Supplementary Table 2: All drugs approved between 1995-2016 that did not receive the**

| Generic name                                               | Brand name                        | Review status |          |
|------------------------------------------------------------|-----------------------------------|---------------|----------|
|                                                            |                                   | Standard      | Priority |
| Albutrepenonacog Alfa                                      | Idelvion                          | 1             |          |
| Antihemophilic Factor<br>(Recombinant) Porcine<br>Sequence | Obizur                            | 1             |          |
| Antihemophilic Factor                                      | Adynovate                         | 1             |          |
| Bepotastine                                                | Bepreve                           | 1             |          |
| Butenafine                                                 | Dr. Scholl's athlete's foot cream | 1             |          |
| Cefdinir                                                   | Omnicef                           | 1             |          |
| Ceftibuten                                                 | Cedax                             | 1             |          |
| Doxycycline                                                | Efracea                           | 1             |          |
| Ezogabine                                                  | Potiga                            | 1             |          |
| Ferumoxytol                                                | Feraheme                          | 1             |          |
| Fleroxacin                                                 | Megalone                          | 1             |          |
| Fosfomycin                                                 | Monurol                           | 1             |          |
| Fosphenytoin                                               | Cerebyx injection                 | 1             |          |
| Levobupivacaine                                            | Chirocaine                        | 1             |          |
| Lonoctocog Alfa                                            | Afstyla                           | 1             |          |
| Lumiracoxib                                                | Prexige                           | 1             |          |
| Methoxy Polyethylene<br>glycol-epoetin beta                | Mircera                           | 1             |          |
| Oxiconazole                                                | Oxizole                           | 1             |          |
| Praziquantel                                               | Biltricide                        | 1             |          |
| Remifentanil                                               | Ultiva injection                  | 1             |          |
| Retapamulin                                                | Altargo                           | 1             |          |
| Rupatadine                                                 | Rupall                            | 1             |          |
| Sevelamer                                                  | Renagel                           | 1             |          |
| Telavancin                                                 | Vibativ                           | 1             |          |
| Trandolapril                                               | Odrik                             | 1             |          |
| Turoctocog alfa                                            | Zonovate                          | 1             |          |

|    |                         |                   |   |
|----|-------------------------|-------------------|---|
| 1  |                         |                   |   |
| 2  |                         |                   |   |
| 3  | Fomepizole              | Antizol           | 1 |
| 4  | Iron dextran            | Dexferrum         | 1 |
| 5  |                         |                   |   |
| 6  | Tegafur/uracil and      | Orzel             | 1 |
| 7  | leucovorin calcium      |                   |   |
| 8  |                         |                   |   |
| 9  | Aminolevulinic acid     | Levulan           | 1 |
| 10 |                         |                   |   |
| 11 | Losoxantrone            | Bianda            | 1 |
| 12 | Pegaspargase            | Oncaspar          | 1 |
| 13 | Valrubicin              | Valstar           | 1 |
| 14 | Nelarabine              | Atriance          |   |
| 15 | Alectinib               | Alecensaro        |   |
| 16 | Elotuzumab              | Empliciti         | 1 |
| 17 |                         |                   |   |
| 18 | Daratumumab             | Darzalex          |   |
| 19 |                         |                   |   |
| 20 |                         |                   |   |
| 21 |                         |                   |   |
| 22 | Anagrelide as           | Agrylin           | 1 |
| 23 | hydrochloride           |                   |   |
| 24 | Dexfenfluramine         | Redux             | 1 |
| 25 | Halofantrine            | Halfan            | 1 |
| 26 | Tazarotene              | Tazorac Gel       | 1 |
| 27 | Vorapaxar               | Zontivity         | 1 |
| 28 | Reviparin               | Clivarine         | 1 |
| 29 |                         |                   |   |
| 30 |                         |                   |   |
| 31 | Nadroparin              | Fraxiparine       | 1 |
| 32 |                         |                   |   |
| 33 |                         |                   |   |
| 34 | Argatroban              | Argatroban        | 1 |
| 35 | Saquinavir              | Saquinavir        | 1 |
| 36 |                         |                   |   |
| 37 | Carvedilol              | Dilatrend         | 1 |
| 38 |                         |                   |   |
| 39 | Carvedilol              | Kredex            | 1 |
| 40 |                         |                   |   |
| 41 | Clevidipine             | Cleviprex         | 1 |
| 42 | Ibutilide               | Corvert injection | 1 |
| 43 | Mangafodipir            | Teslascan         | 1 |
| 44 |                         |                   |   |
| 45 | Sulfur Hexafluoride     | Sonovue           | 1 |
| 46 |                         |                   |   |
| 47 | Gadoterate Meglumine    | Dotarem           | 1 |
| 48 |                         |                   |   |
| 49 | Ferumoxsil              | Gastromark        | 1 |
| 50 | Palmitic acid/Galactose | Levovist          | 1 |
| 51 |                         |                   |   |
| 52 |                         |                   |   |
| 53 | Gadolinium (III)        | Gadolite          | 1 |
| 54 | Ioxilan                 | Oxilan            | 1 |
| 55 | Rimexolone              | Vexol             | 1 |
| 56 |                         |                   |   |
| 57 |                         |                   |   |
| 58 |                         |                   |   |
| 59 |                         |                   |   |
| 60 |                         |                   |   |

|    |                        |                    |   |   |
|----|------------------------|--------------------|---|---|
| 1  |                        |                    |   |   |
| 2  |                        |                    |   |   |
| 3  | Difluprednate          | Durezol            | 1 |   |
| 4  |                        |                    |   |   |
| 5  |                        |                    |   |   |
| 6  | Thyrotropin            | Thyrogen           | 1 |   |
| 7  | Methacholine           | Methacoline        | 1 |   |
| 8  | Sulesomab              | Leukoscan          | 1 |   |
| 9  | Kit for preparation of | Myoscint           | 1 |   |
| 10 | indium in 111          |                    |   |   |
| 11 | imciromab pentetate    |                    |   |   |
| 12 |                        |                    |   |   |
| 13 | Arcitumomab            | CEA-Scan           | 1 |   |
| 14 | Bicisate               | OncoScint          | 1 |   |
| 15 |                        |                    |   |   |
| 16 | Pantoprazole           | Panto-Byk          | 1 |   |
| 17 | Lubiprostone           | Amitiza            | 1 |   |
| 18 | Olodaterol             | Striverdi respimat | 1 |   |
| 19 |                        |                    |   |   |
| 20 | Reslizumab             | Cinqair            | 1 |   |
| 21 |                        |                    |   |   |
| 22 | Tiludronate            | Skelid             | 1 |   |
| 23 |                        |                    |   |   |
| 24 | Albiglutide            | Eperzan            | 1 |   |
| 25 | Miglitol               | Glyset             | 1 |   |
| 26 | Toremifene             | Fareston           | 1 |   |
| 27 | Botulinium antitoxin   | BAT                | 1 |   |
| 28 |                        |                    |   |   |
| 29 | Cytomegalovirus        | Cytogam            | 1 |   |
| 30 | immune globulin        |                    |   |   |
| 31 |                        |                    |   |   |
| 32 |                        |                    |   |   |
| 33 | Peginterferon Beta-1A  | Plegridy           | 1 |   |
| 34 | F-Fluorodeoxyglucose   | Cantrace           |   | 1 |
| 35 | Rubidium chloride rb   | Ruby-fill          |   | 1 |
| 36 | 82                     |                    |   |   |
| 37 |                        |                    |   |   |
| 38 | Troglitazone           | Rezulin            |   | 1 |
| 39 | Respiratory syncytial  | Respigam           |   | 1 |
| 40 | virus immune globulin  |                    |   |   |
| 41 |                        |                    |   |   |
| 42 | Molgramostim           | Leucomax           |   | 1 |
| 43 |                        |                    |   |   |
| 44 | Anti-thymocyte         | Thymoglobulin      | 1 |   |
| 45 | globulin               |                    |   |   |
| 46 |                        |                    |   |   |
| 47 | Infliximab             | Remicade           |   | 1 |
| 48 | Cisatracurium          | Nimbex injection   | 1 |   |
| 49 | Unoprostone isopropyl  | Rescula            | 1 |   |
| 50 |                        |                    |   |   |
| 51 | Tafluprost             | Saflutan           | 1 |   |
| 52 | Bromfenac              | Prolensa           | 1 |   |
| 53 | Olopatadine            | Patanol            | 1 |   |
| 54 | Human C1 esterase      | Berinerter         | 1 |   |
| 55 | inhibitor              |                    |   |   |
| 56 |                        |                    |   |   |
| 57 |                        |                    |   |   |
| 58 |                        |                    |   |   |
| 59 |                        |                    |   |   |
| 60 |                        |                    |   |   |

|    |                         |                  |   |
|----|-------------------------|------------------|---|
| 1  |                         |                  |   |
| 2  |                         |                  |   |
| 3  | Tetrabenazine           | Nitoman          | 1 |
| 4  | Finafloxacin            | Xtoro            | 1 |
| 5  | Sermorelin              | Geref            | 1 |
| 6  |                         |                  |   |
| 7  |                         |                  |   |
| 8  | Dextromethylphenidate   | Attenade         | 1 |
| 9  |                         |                  |   |
| 10 |                         |                  |   |
| 11 | Vilazodone              | Viibryd          | 1 |
| 12 |                         |                  |   |
| 13 | Choriogonadotropin Alfa | Ovidrel          | 1 |
| 14 |                         |                  |   |
| 15 | Follitropin alpha       | Gonal-F          | 1 |
| 16 |                         |                  |   |
| 17 | Amlexanox               | Aphthera         | 1 |
| 18 | Lexidronam              | Quadramet        | 1 |
| 19 |                         |                  |   |
| 20 | Zucapsaicin             | Civanex (Zuacta) | 1 |
| 21 |                         |                  |   |
| 22 | Rotavirus vaccine       | Rotarix          | 1 |
| 23 | Influenza vaccine       | Flumist          | 1 |
| 24 |                         |                  |   |
| 25 | Haemagglutinin-Strain A | Arepranrix H5N1  | 1 |
| 26 |                         |                  |   |
| 27 |                         |                  |   |
| 28 | Polidocanol             | Varithena        | 1 |
| 29 | Glycerol                | Ravicti          | 1 |
| 30 |                         |                  |   |
| 31 | Elosulfase Alfa         | Vimizim          | 1 |
| 32 |                         |                  |   |
| 33 | Levocarnitine           | Carnitor         | 1 |
| 34 |                         |                  |   |
| 35 | Alitretinoin            | Panretin         | 1 |
| 36 |                         |                  |   |
| 37 | Nitric oxide            | Inomax           | 1 |
| 38 | Yttrium-90              | Yttrium-90       | 1 |
| 39 |                         |                  |   |
| 40 | Tositumomab             | Bexxar           | 1 |
| 41 |                         |                  |   |
| 42 | Remestemcel-L           | Prochymal        | 1 |
| 43 | Measles virus           | Moru-Viraten     | 1 |
| 44 |                         |                  |   |
| 45 | Diphtheria, tetanus &   | Infanrix         | 1 |
| 46 | Lipoprotein-OspA        | Lymerix          | 1 |
| 47 |                         |                  |   |
| 48 |                         |                  |   |
| 49 |                         |                  |   |
| 50 |                         |                  |   |
| 51 |                         |                  |   |
| 52 |                         |                  |   |
| 53 |                         |                  |   |
| 54 |                         |                  |   |
| 55 |                         |                  |   |
| 56 |                         |                  |   |
| 57 |                         |                  |   |
| 58 |                         |                  |   |
| 59 |                         |                  |   |
| 60 |                         |                  |   |



## Therapeutic assessments

|  | Notice of compliance or Notice of compliance with conditions | Small molecule | Biologic | ATC group (second level)                                 |
|--|--------------------------------------------------------------|----------------|----------|----------------------------------------------------------|
|  | 1/26/2016                                                    |                | 1        | antihemorrhagics                                         |
|  | 10/14/2015                                                   |                | 1        | antihemorrhagics                                         |
|  | 11/17/2016                                                   |                | 1        | antihemorrhagics                                         |
|  | 7/27/2016                                                    | 1              |          | antihistamines for systemic use                          |
|  | 4/15/1997                                                    |                |          | antifungals for dermatological use                       |
|  | 2/5/1999                                                     |                |          | antibacterials for systemic use                          |
|  | 5/9/1995                                                     |                |          | antibacterials for systemic use                          |
|  | 11/14/2011                                                   | 1              |          | antibacterials for systemic use                          |
|  | 10/8/2012                                                    | 1              |          | antiepileptics                                           |
|  | 12/8/2011                                                    | 1              |          | antianemic preparations                                  |
|  | 8/21/1996                                                    |                |          | antibacterials for systemic use                          |
|  | 4/12/1999                                                    |                |          | antibacterials for systemic use                          |
|  | 3/20/1997                                                    |                |          | antiepileptics                                           |
|  | 3/20/2002                                                    | 1              |          | anesthetics                                              |
|  | 12/12/2016                                                   |                | 1        | antihemorrhagics                                         |
|  | 11/2/2006                                                    | 1              |          | antiinflammatory and antirheumatic                       |
|  | 3/31/2008                                                    |                | 1        | antianemic preparations                                  |
|  | 8/8/1997                                                     |                |          | antifungals for dermatological use                       |
|  | 3/7/1997                                                     |                |          | anthelminics                                             |
|  | 12/24/1996                                                   |                |          | anesthetics                                              |
|  | 3/19/2008                                                    | 1              |          | antibiotics and chemotherapeutics for dermatological use |
|  | 7/20/2016                                                    | 1              |          | antihistamines for systemic use                          |
|  | 2/24/2000                                                    | 1              |          | all other therapeutic products                           |
|  | 9/29/2009                                                    | 1              |          | antibacterials for systemic use                          |
|  | 5/15/1997                                                    |                |          | agents acting on the renin-angiotensin system            |
|  | 12/8/2014                                                    |                | 1        | antihemorrhagics                                         |

1  
2  
3  
4  
5  
6  
7  
8  
9  
10  
11  
12  
13  
14  
15  
16  
17  
18  
19  
20  
21  
22  
23  
24  
25  
26  
27  
28  
29  
30  
31  
32  
33  
34  
35  
36  
37  
38  
39  
40  
41  
42  
43  
44  
45  
46  
47  
48  
49  
50  
51  
52  
53  
54  
55  
56  
57  
58  
59  
60

|   |            |   |   |                                  |
|---|------------|---|---|----------------------------------|
|   | 11/30/2000 | 1 |   | all other therapeutic products   |
|   | 1/9/1996   |   |   | antianemic preparations          |
|   | 4/6/2001   | 1 |   | antineoplastic agents            |
|   | 6/20/2001  | 1 |   | antineoplastic agents            |
|   | 2/19/1995  |   |   | antineoplastic agents            |
|   | 11/19/1997 |   |   | antineoplastic agents            |
|   | 7/4/2000   | 1 |   | antineoplastic agents            |
| 1 | 9/22/2007  | 1 |   | antineoplastic agents            |
| 1 | 9/29/2016  | 1 |   | antineoplastic agents            |
|   | 6/21/2016  |   | 1 | antineoplastic agents            |
| 1 | 6/29/2016  |   | 1 | antineoplastic agents            |
|   | 11/19/1997 |   |   | antineoplastic agents            |
|   | 7/29/1996  |   |   | antiobesity preparations         |
|   | 3/29/1995  |   |   | antiprotozoals                   |
|   | 2/25/1997  |   |   | antipsoriatics                   |
|   | 5/13/2016  | 1 |   | antithrombotic agents            |
|   | 9/10/1996  |   |   | antithrombotic agents            |
|   | 11/27/1997 |   |   | antithrombotic agents            |
|   | 6/4/2001   | 1 |   | antithrombotic agents            |
|   | 3/22/1996  |   |   | antivirals for systemic use      |
|   | 2/27/1995  |   |   | beta blocking agents             |
|   | 2/27/1995  |   |   | beta blocking agents             |
|   | 4/15/2011  | 1 |   | calcium channel blockers         |
|   | 7/14/2000  | 1 |   | cardiac therapy                  |
|   | 2/9/2000   | 1 |   | contrast media                   |
|   | 2/12/2004  | 1 |   | contrast media                   |
|   | 11/25/2016 | 1 |   | contrast media                   |
|   | 3/15/1996  |   |   | contrast media                   |
|   | 7/31/1996  |   |   | contrast media                   |
|   | 4/8/1998   |   |   | contrast media                   |
|   | 10/5/1999  |   |   | contrast media                   |
|   | 1/17/1996  |   |   | corticosteroids for systemic use |

1  
2  
3  
4  
5  
6  
7  
8  
9  
10  
11  
12  
13  
14  
15  
16  
17  
18  
19  
20  
21  
22  
23  
24  
25  
26  
27  
28  
29  
30  
31  
32  
33  
34  
35  
36  
37  
38  
39  
40  
41  
42  
43  
44  
45  
46  
47  
48  
49  
50  
51  
52  
53  
54  
55  
56  
57  
58  
59  
60

|            |   |                                              |
|------------|---|----------------------------------------------|
| 11/4/2013  | 1 | corticosteroids, dermatological preparations |
| 5/31/2002  | 1 | diagnostic agents                            |
| 2/25/1999  |   | diagnostic agents                            |
| 1/17/2005  | 1 | diagnostic radiopharmaceuticals              |
| 7/2/1997   |   | diagnostic radiopharmaceuticals              |
| 9/16/1997  |   | diagnostic radiopharmaceuticals              |
| 1/16/1998  |   | diagnostic radiopharmaceuticals              |
| 7/5/1996   |   | drugs for acid related disorders             |
| 10/14/2015 | 1 | drugs for constipation                       |
| 6/11/2013  | 1 | drugs for obstructive airway diseases        |
| 7/20/2016  | 1 | drugs for obstructive airway diseases        |
| 2/6/1997   |   | drugs for treatment of bone diseases         |
| 7/15/2015  | 1 | drugs used in diabetes                       |
| 7/22/1998  |   | drugs used in diabetes                       |
| 12/14/1998 |   | endocrine therapy                            |
| 12/8/2016  | 1 | immune sera and immunoglobulins              |
| 8/1/1997   |   | immune sera and immunoglobulins              |
| 8/10/2015  | 1 | immunostimulants                             |
| 7/27/2006  | 1 | diagnostic radiopharmaceuticals              |
| 9/20/2011  | 1 | diagnostic radiopharmaceuticals              |
| 5/9/1997   |   | drugs used in diabetes                       |
| 8/20/1997  |   | immune sera and immunoglobulins              |
| 3/10/1997  |   | immunostimulants                             |
| 11/20/2002 | 1 | immunosuppressants                           |
| 9/27/2001  | 1 | immunosuppressants                           |
| 12/18/1996 |   | muscle relaxants                             |
| 4/3/2002   | 1 | ophthalmologicals                            |
| 5/26/2014  | 1 | ophthalmologicals                            |
| 3/26/2015  | 1 | ophthalmologicals                            |
| 9/16/1997  |   | ophthalmologicals                            |
| 5/31/2010  | 1 | other hematological agents                   |

|    |            |   |   |                                     |
|----|------------|---|---|-------------------------------------|
| 1  |            |   |   |                                     |
| 2  |            |   |   |                                     |
| 3  | 12/29/1995 |   |   | other nervous system drugs          |
| 4  | 3/11/2016  | 1 |   | otologicals                         |
| 5  | 6/8/1995   |   |   | pituitary and hypothalamic hormones |
| 6  |            |   |   | and analogues                       |
| 7  |            |   |   |                                     |
| 8  | 8/12/2003  | 1 |   | psychoanaleptics                    |
| 9  |            |   |   |                                     |
| 10 |            |   |   |                                     |
| 11 | 7/16/2015  | 1 |   | psychoanaleptics                    |
| 12 |            |   |   |                                     |
| 13 | 12/16/2004 |   | 1 | sex hormones and modulators of the  |
| 14 |            |   |   | genital system                      |
| 15 | 6/6/1997   |   |   | sex hormones and modulators of the  |
| 16 |            |   |   |                                     |
| 17 | 12/11/2000 | 1 |   | stomatological preparations         |
| 18 | 6/22/1998  |   |   | therapeutic radiopharmaceuticals    |
| 19 | 7/15/2010  | 1 |   | topical products for joint and      |
| 20 |            |   |   | muscular pain                       |
| 21 |            |   |   |                                     |
| 22 | 10/9/2007  |   | 1 | vaccines                            |
| 23 | 6/22/2010  |   | 1 | vaccines                            |
| 24 |            |   |   |                                     |
| 25 | 2/13/2013  |   | 1 | vaccines                            |
| 26 |            |   |   |                                     |
| 27 |            |   |   |                                     |
| 28 | 8/4/2015   | 1 |   | vasoprotectives                     |
| 29 | 3/16/2016  | 1 |   | other alimentary tract and          |
| 30 |            |   |   |                                     |
| 31 | 7/2/2014   |   | 1 | other alimentary tract and          |
| 32 |            |   |   |                                     |
| 33 | 1/19/1995  |   |   | other alimentary tract and          |
| 34 |            |   |   | metabolism products                 |
| 35 | 6/11/1999  |   |   | other dermatological preparations   |
| 36 | 9/23/2005  | 1 |   | other respiratory system products   |
| 37 |            |   |   |                                     |
| 38 | 12/2/2004  |   | 1 | therapeutic radiopharmaceuticals    |
| 39 | 8/18/2005  |   | 1 | therapeutic radiopharmaceuticals    |
| 40 |            |   |   |                                     |
| 41 | 5/17/2012  |   | 1 | unassigned                          |
| 42 | 2/26/1996  |   |   | vaccines                            |
| 43 |            |   |   |                                     |
| 44 | 12/17/1996 |   |   | vaccines                            |
| 45 |            |   |   |                                     |
| 46 | 12/2/1998  |   |   | vaccines                            |
| 47 |            |   |   |                                     |
| 48 |            |   |   |                                     |
| 49 |            |   |   |                                     |
| 50 |            |   |   |                                     |
| 51 |            |   |   |                                     |
| 52 |            |   |   |                                     |
| 53 |            |   |   |                                     |
| 54 |            |   |   |                                     |
| 55 |            |   |   |                                     |
| 56 |            |   |   |                                     |
| 57 |            |   |   |                                     |
| 58 |            |   |   |                                     |
| 59 |            |   |   |                                     |
| 60 |            |   |   |                                     |

## STROBE Statement—checklist of items that should be included in reports of observational studies

|                          | Item No | Recommendation                                                                                                                                                                                                                                                                                                                                                                                                                                                         | Location in study             |
|--------------------------|---------|------------------------------------------------------------------------------------------------------------------------------------------------------------------------------------------------------------------------------------------------------------------------------------------------------------------------------------------------------------------------------------------------------------------------------------------------------------------------|-------------------------------|
| Title and abstract       | 1       | (a) Indicate the study's design with a commonly used term in the title or the abstract                                                                                                                                                                                                                                                                                                                                                                                 | Title, page 1                 |
|                          |         | (b) Provide in the abstract an informative and balanced summary of what was done and what was found                                                                                                                                                                                                                                                                                                                                                                    | Structured summary, pages 2-3 |
| <b>Introduction</b>      |         |                                                                                                                                                                                                                                                                                                                                                                                                                                                                        |                               |
| Background/rationale     | 2       | Explain the scientific background and rationale for the investigation being reported                                                                                                                                                                                                                                                                                                                                                                                   | Introduction, page 5          |
| Objectives               | 3       | State specific objectives, including any prespecified hypotheses                                                                                                                                                                                                                                                                                                                                                                                                       | Introduction, page 6          |
| <b>Methods</b>           |         |                                                                                                                                                                                                                                                                                                                                                                                                                                                                        |                               |
| Study design             | 4       | Present key elements of study design early in the paper                                                                                                                                                                                                                                                                                                                                                                                                                | Methods, pages 6-8            |
| Setting                  | 5       | Describe the setting, locations, and relevant dates, including periods of recruitment, exposure, follow-up, and data collection                                                                                                                                                                                                                                                                                                                                        | Methods, pages 6-8, 10        |
| Participants             | 6       | (a) <i>Cohort study</i> —Give the eligibility criteria, and the sources and methods of selection of participants. Describe methods of follow-up<br><i>Case-control study</i> —Give the eligibility criteria, and the sources and methods of case ascertainment and control selection. Give the rationale for the choice of cases and controls<br><i>Cross-sectional study</i> —Give the eligibility criteria, and the sources and methods of selection of participants | Methods, pages 6, 7           |
|                          |         | (b) <i>Cohort study</i> —For matched studies, give matching criteria and number of exposed and unexposed<br><i>Case-control study</i> —For matched studies, give matching criteria and the number of controls per case                                                                                                                                                                                                                                                 |                               |
| Variables                | 7       | Clearly define all outcomes, exposures, predictors, potential confounders, and effect modifiers. Give diagnostic criteria, if applicable                                                                                                                                                                                                                                                                                                                               | Methods, pages 8-10           |
| Data sources/measurement | 8*      | For each variable of interest, give sources of data and details of methods of assessment (measurement). Describe comparability of assessment methods if there is more than one group                                                                                                                                                                                                                                                                                   | Methods, pages 7-10           |
| Bias                     | 9       | Describe any efforts to address potential sources of bias                                                                                                                                                                                                                                                                                                                                                                                                              | Not relevant                  |
| Study size               | 10      | Explain how the study size was arrived at                                                                                                                                                                                                                                                                                                                                                                                                                              | Not relevant                  |
| Quantitative variables   | 11      | Explain how quantitative variables were handled in the analyses. If applicable, describe which groupings were chosen and why                                                                                                                                                                                                                                                                                                                                           | Not relevant                  |
| Statistical methods      | 12      | (a) Describe all statistical methods, including those used to control for confounding                                                                                                                                                                                                                                                                                                                                                                                  | Methods, page 10              |
|                          |         | (b) Describe any methods used to examine subgroups and interactions                                                                                                                                                                                                                                                                                                                                                                                                    | Methods, pages 9, 10          |

|                   |     |                                                                                                                                                                                                              |                      |
|-------------------|-----|--------------------------------------------------------------------------------------------------------------------------------------------------------------------------------------------------------------|----------------------|
|                   |     | (c) Explain how missing data were addressed                                                                                                                                                                  | Not relevant         |
|                   |     | (d) <i>Cohort study</i> —If applicable, explain how loss to follow-up was addressed                                                                                                                          | Not relevant         |
|                   |     | <i>Case-control study</i> —If applicable, explain how matching of cases and controls was addressed                                                                                                           |                      |
|                   |     | <i>Cross-sectional study</i> —If applicable, describe analytical methods taking account of sampling strategy                                                                                                 |                      |
|                   |     | (e) Describe any sensitivity analyses                                                                                                                                                                        | Not relevant         |
| <b>Results</b>    |     |                                                                                                                                                                                                              |                      |
| Participants      | 13* | (a) Report numbers of individuals at each stage of study—eg numbers potentially eligible, examined for eligibility, confirmed eligible, included in the study, completing follow-up, and analysed            | Results, pages 10-12 |
|                   |     | (b) Give reasons for non-participation at each stage                                                                                                                                                         |                      |
|                   |     | (c) Consider use of a flow diagram                                                                                                                                                                           | Not relevant         |
| Descriptive data  | 14* | (a) Give characteristics of study participants (eg demographic, clinical, social) and information on exposures and potential confounders                                                                     | Not relevant         |
|                   |     | (b) Indicate number of participants with missing data for each variable of interest                                                                                                                          | Results, page 13     |
|                   |     | (c) <i>Cohort study</i> —Summarise follow-up time (eg, average and total amount)                                                                                                                             | Not relevant         |
| Outcome data      | 15* | <i>Cohort study</i> —Report numbers of outcome events or summary measures over time                                                                                                                          | Results, pages 11-15 |
|                   |     | <i>Case-control study</i> —Report numbers in each exposure category, or summary measures of exposure                                                                                                         |                      |
|                   |     | <i>Cross-sectional study</i> —Report numbers of outcome events or summary measures                                                                                                                           |                      |
| Main results      | 16  | (a) Give unadjusted estimates and, if applicable, confounder-adjusted estimates and their precision (eg, 95% confidence interval). Make clear which confounders were adjusted for and why they were included |                      |
|                   |     | (b) Report category boundaries when continuous variables were categorized                                                                                                                                    | Not relevant         |
|                   |     | (c) If relevant, consider translating estimates of relative risk into absolute risk for a meaningful time period                                                                                             | Not relevant         |
| Other analyses    | 17  | Report other analyses done—eg analyses of subgroups and interactions, and sensitivity analyses                                                                                                               | Not relevant         |
| <b>Discussion</b> |     |                                                                                                                                                                                                              |                      |
| Key results       | 18  | Summarise key results with reference to study objectives                                                                                                                                                     | Discussion, page 16  |
| Limitations       | 19  | Discuss limitations of the study, taking into account sources of potential bias or imprecision. Discuss both direction and magnitude of any potential bias                                                   | Limitations, page 19 |
| Interpretation    | 20  | Give a cautious overall interpretation of results considering objectives, limitations, multiplicity of analyses, results from similar studies, and other relevant evidence                                   | Conclusion, page 19  |

|   |                  |    |                                                               |
|---|------------------|----|---------------------------------------------------------------|
| 1 |                  |    |                                                               |
| 2 | Generalisability | 21 | Discuss the generalisability (external validity) of the study |
| 3 |                  |    | results                                                       |
| 4 | <hr/>            |    |                                                               |

5 **Other information**

|   |         |    |                                                                   |         |
|---|---------|----|-------------------------------------------------------------------|---------|
| 6 | Funding | 22 | Give the source of funding and the role of the funders for the    | Page 20 |
| 7 |         |    | present study and, if applicable, for the original study on which |         |
| 8 |         |    | the present article is based                                      |         |

9

10 \*Give information separately for cases and controls in case-control studies and, if applicable, for exposed and

11 unexposed groups in cohort and cross-sectional studies.

12

13

14 **Note:** An Explanation and Elaboration article discusses each checklist item and gives methodological background and

15 published examples of transparent reporting. The STROBE checklist is best used in conjunction with this article (freely

16 available on the Web sites of PLoS Medicine at <http://www.plosmedicine.org/>, Annals of Internal Medicine at

17 <http://www.annals.org/>, and Epidemiology at <http://www.epidem.com/>). Information on the STROBE Initiative is

18 available at [www.strobe-statement.org](http://www.strobe-statement.org).

19

# BMJ Open

## Health Canada's use of expedited review pathways and therapeutic innovation, 1995-2016: cross sectional analysis

|                                 |                                                                                                                                               |
|---------------------------------|-----------------------------------------------------------------------------------------------------------------------------------------------|
| Journal:                        | <i>BMJ Open</i>                                                                                                                               |
| Manuscript ID                   | bmjopen-2018-023605.R1                                                                                                                        |
| Article Type:                   | Research                                                                                                                                      |
| Date Submitted by the Author:   | 18-Jun-2018                                                                                                                                   |
| Complete List of Authors:       | Lexchin, Joel; York University, School of Health Policy & Management                                                                          |
| <b>Primary Subject Heading</b>: | Health policy                                                                                                                                 |
| Secondary Subject Heading:      | Health services research, Pharmacology and therapeutics                                                                                       |
| Keywords:                       | Health policy < HEALTH SERVICES ADMINISTRATION & MANAGEMENT, accelerated approvals, Health Canada, therapeutic evaluation, therapeutic groups |
|                                 |                                                                                                                                               |

SCHOLARONE™  
Manuscripts

Peer Review Only



1  
2  
3 1 **Health Canada's use of expedited review pathways and therapeutic innovation, 1995-**  
4  
5 2 **2016: cross sectional analysis**  
6

7  
8 3 Joel Lexchin MSc, MD<sup>1,2,3</sup>  
9

10 4 <sup>1</sup>Professor Emeritus

11  
12 5 School of Health Policy and Management

13  
14 6 York University

15  
16 7 <sup>2</sup>Emergency Physician

17  
18 8 University Health Network

19  
20 9 <sup>3</sup>Associate Professor

21  
22 10 Faculty of Medicine

23  
24 11 University of Toronto

25  
26 12

27  
28 13 Correspondence:

29  
30 14 Joel Lexchin MD

31  
32 15 School of Health Policy and Management

33  
34 16 York University

35  
36 17 4700 Keele St.

37  
38 18 Toronto, ON M3J 1P3

39  
40 19 Tel: 416-964-7186

41  
42 20 Email: [jlexchin@yorku.ca](mailto:jlexchin@yorku.ca)

43  
44 21 ORCID ID: 0000-0001-5120-8029

45  
46 22 **Key words:**

47  
48 23 expedited approvals, Health Canada, health policy, therapeutic evaluation, therapeutic group

49  
50 24 **Word count:**

51  
52 25 3030  
53  
54  
55  
56  
57  
58  
59  
60

1  
2  
3 26 **Structured summary**  
4

5 27 **Objectives**  
6  
7

8 28 This study examines the use of expedited approval pathways by Health Canada over the  
9  
10 29 period 1995 to 2016 inclusive and the relationship between the use of these pathways and the  
11  
12 30 therapeutic gain offered by new products.  
13  
14

15  
16 31 **Design**  
17

18  
19 32 Cross sectional study.  
20  
21

22 33 **Data sources**  
23

24  
25 34 Therapeutic Products Directorate, Biologics and Genetic Therapies Directorate, Notice of  
26  
27 35 Compliance database, Notice of Compliance with conditions web site, Patented Medicine  
28  
29 36 Prices Review Board, La revue Prescrire, World Health Organization (WHO) Anatomical  
30  
31 37 Therapeutic Chemical (ATC) classification system.  
32  
33

34  
35 38 **Interventions**  
36

37  
38 39 None  
39  
40

41  
42 40 **Primary and secondary outcomes**  
43

44  
45 41 Percent of new drugs evaluated by Health Canada that went through an expedited pathway  
46  
47 42 between 1995 and 2016 inclusive. Kappa values comparing the review status to assessments  
48  
49 43 of therapeutic value for individual drugs.  
50  
51

52 44 **Results**  
53  
54  
55  
56  
57  
58  
59  
60

1  
2  
3 45 Of 623 drugs approved by Health Canada between 1995 and 2016, 438 (70.3%) drugs went  
4  
5 46 through the standard pathway, 185 (29.7%) an expedited pathway. Therapeutic evaluations  
6  
7 47 were available for 509 drugs. Health Canada used an expedited approval pathway for 159 of  
8  
9 48 the 509 drugs whereas only 55 were judged to be therapeutically innovative. Forty-two of the  
10  
11 49 55 therapeutically innovative drugs received an expedited review and 13 received a standard  
12  
13 50 review. The Kappa value for the entire period for all 509 drugs was 0.276 (95% CI 0.194,  
14  
15 51 0.359) indicating “fair” agreement between Health Canada’s use of expedited pathways and  
16  
17 52 independent evaluations of therapeutic innovation.  
18  
19  
20

### 21 **Conclusion**

22  
23  
24 54 Health Canada’s use of expedited approvals was stable over the entire time period. Its ability  
25  
26 55 to predict which drugs will offer a major therapeutic gain is poor. The findings in this study  
27  
28 56 should provoke a discussion about whether Health Canada should continue to use these  
29  
30 57 pathways and if so how their use can be improved.  
31  
32  
33  
34  
35  
36  
37  
38  
39  
40  
41  
42  
43  
44  
45  
46  
47  
48  
49  
50  
51  
52  
53  
54  
55  
56  
57  
58

1  
2  
3 59 **Article Summary**  
4

5 60 *Strengths and limitations of this study*  
6

- 7 61 • Cross sectional analysis of the use of expedited approval pathways by Health Canada  
8  
9 62 over an extended period of time.  
10  
11 63 • Comparison of use of expedited approval pathways to independent assessment of  
12  
13 64 therapeutic evaluation.  
14  
15 65 • Analysis of approvals and therapeutic value of therapeutic subgroups.  
16  
17  
18 66 • Twenty percent of new drugs approved did not have therapeutic evaluations.  
19

20 67  
21  
22  
23  
24  
25  
26  
27  
28  
29  
30  
31  
32  
33  
34  
35  
36  
37  
38  
39  
40  
41  
42  
43  
44  
45  
46  
47  
48  
49  
50  
51  
52  
53  
54  
55  
56  
57  
58  
59  
60

1  
2  
3 68 • **Acknowledgements**  
4

5 69 • None  
6

7 70 • **Competing Interests**  
8

9 71 • In 2015-2017, Joel Lexchin received payment from two non-profit organizations for  
10  
11 being a consultant on a project looking at indication-based prescribing and a second  
12  
13 looking at which drugs should be distributed free of charge by general practitioners. In  
14  
15 2015, he received payment from a for-profit organization for being on a panel that  
16  
17 discussed expanding drug insurance in Canada. He is on the Foundation Board of Health  
18  
19 Action International.  
20  
21 76

22 77 • **Funding**  
23

24 78 • This research received no specific grant from any funding agency in the public,  
25  
26 commercial or not-for profit sectors.  
27  
28 79

29 80 • **Data sharing statement**  
30

31 81 • Full data that was extracted is available from the online data repository Dryad  
32  
33 <http://datadryad.org> with the DOI: doi:10.5061/dryad.0bf6000.  
34  
35 82

36 83 • **Contributorship statement**  
37

38 84 • JL came up with the idea for this study, gathered and analyzed the data and wrote the  
39  
40 manuscript.  
41  
42  
43  
44  
45  
46  
47  
48  
49  
50  
51  
52  
53  
54  
55  
56  
57  
58  
59  
60

## 86 **Introduction**

87 In order to obtain authorization to market a new active substance (NAS - a molecule never  
88 marketed before in Canada in any form) in Canada, companies typically file a New Drug  
89 Submission (NDS) which includes preclinical and clinical scientific information about the  
90 product's safety, efficacy and quality and information about its claimed therapeutic value,  
91 conditions for use and side effects [1]. Health Canada then has a 300-day period to evaluate  
92 this information and make a decision about whether to allow the product to be sold, i.e.,  
93 whether to issue a Notice of Compliance (NOC).

94  
95 In an effort to ensure that promising therapies for serious, life-threatening or debilitating  
96 illnesses reach Canadians in a timely manner, Health Canada has developed two other  
97 pathways for approving NAS. These are described in detail elsewhere [2], but briefly, the  
98 first of these is a priority review that involves the company submitting a complete NDS but  
99 with a review period of 180 days [3]. The second is the Notice of Compliance with conditions  
100 (NOC/c) [4] whereby Health Canada will give a conditional approval based on limited  
101 evidence – Phase II clinical trials or trials with only surrogate markers. In return for NOC/c  
102 status, companies commit to further studies that definitively establish efficacy and submit the  
103 results of these to Health Canada. A failure to complete these studies or negative results from  
104 them could lead to the marketing authorization being cancelled.

105  
106 Lexchin has examined how closely Health Canada's use of the two pathways (priority review  
107 and NOC/c, hereafter collectively termed expedited review pathways) corresponds to  
108 independent assessments of the therapeutic innovation of drugs at the level of individual  
109 drugs. For the period 1997-2012, the Kappa value was 0.334 (95% CI 0.220, 0.447) or fair  
110 [5].

1  
2  
3 111

4  
5 112 This current study is a further and more detailed look at how Health Canada uses its  
6  
7 113 expedited review pathways, by extending previous work in a number of ways. First it covers  
8  
9 114 a wider time period – 1995 to 2016, inclusive. Second, it looks at the use of both of the  
10  
11 115 expedited review pathways over this entire time period for the entire sample of drugs as well  
12  
13 116 as subgroups – small molecule drugs, biologics, and therapies for serious diseases. Third, it  
14  
15 117 calculates the Kappa values for the entire sample of drugs as well as the subgroups listed  
16  
17 118 above. These subgroups were chosen because small molecules and biologics have  
18  
19 119 fundamentally different characteristics and these may influence a decision to use an  
20  
21 120 expedited review pathway and how accurately Health Canada can predict their therapeutic  
22  
23 121 value. Similarly, when the treatment is for serious medical conditions, Health Canada may be  
24  
25 122 more willing to use an expedited review pathway and may be more likely to believe that the  
26  
27 123 new product will provide a significant therapeutic benefit.  
28  
29

30  
31 12432  
33 125 **Methods**34  
35 126 *Data sources*

36  
37 127 All NAS approved from 1995 to 2016 inclusive were documented using the annual reports  
38  
39 128 from the Therapeutic Products and the Biologics and Genetic Therapies Directorates that are  
40  
41 129 in charge of reviewing applications for new small molecule drugs and biologics and vaccines,  
42  
43 130 respectively. (Reports are available by directly contacting the directorates at  
44  
45 131 [publications@hc-sc.gc.ca](mailto:publications@hc-sc.gc.ca).) A starting year of 1995 was selected as there are no annual  
46  
47 132 reports from Health Canada prior to that year. Generic and brand names along with the  
48  
49 133 specific approval pathway – standard, priority, NOC/c (only from 1998 onwards) – and  
50  
51 134 whether the product was a small molecule drug or biologic (information available only from  
52  
53 135 2000 onwards) were manually extracted from the annual reports by the author.  
54  
55  
56  
57  
58  
59

1  
2  
3 136

4  
5 137 Not all of the drugs with a NOC/c are documented in the annual reports and they were  
6  
7 138 supplemented using four additional sources: articles by Lexchin [6] and Law [7], the Notice  
8  
9 139 of Compliance database (<http://webprod5.hc-sc.gc.ca/noc-ac/index-eng.jsp>) and the Notice  
10  
11 140 of Compliance with conditions web site (<http://www.hc-sc.gc.ca/dhp->  
12  
13 141 [mps/prodpharma/notices-avis/conditions/index-eng.php](http://www.hc-sc.gc.ca/dhp-mps/prodpharma/notices-avis/conditions/index-eng.php)). Only NAS approved for the first  
14  
15 142 time under a NOC/c were considered. Drugs can receive both a priority and NOC/c review  
16  
17 143 and in this case they were only counted as receiving a priority review.  
18  
19

20 144

21  
22 145 *Assessment of therapeutic innovation*

23  
24 146 The therapeutic value of drugs was assessed using the ratings from the annual reports of the  
25  
26 147 Canadian Patented Medicine Prices Review Board (PMPRB) (<http://www.pmprb->  
27  
28 148 [cepmb.gc.ca/english/View.asp?x=91](http://www.pmprb-cepmb.gc.ca/english/View.asp?x=91)) and Prescrire International, the English language  
29  
30 149 translation of the French drug bulletin La revue Prescrire [8]. The processes that these two  
31  
32 150 organizations use in arriving at their decisions about therapeutic innovation have been  
33  
34 151 previously described [5]. For the purpose of this study, products that the PMPRB deemed  
35  
36 152 breakthrough and substantial improvement were termed “innovative” and products in other  
37  
38 153 categories were termed “not innovative” (category 3 = moderate, little or no improvement  
39  
40 154 over existing medicines prior to 2010; slight or no improvement, moderate improvement –  
41  
42 155 primary and moderate improvement – secondary from 2010 onward). Prescrire uses seven  
43  
44 156 categories to rate therapeutic innovation. The first two, bravo (major therapeutic innovation  
45  
46 157 in an area where previously no treatment was available); a real advance (important  
47  
48 158 therapeutic innovation but has limitations) were defined as a significant therapeutic  
49  
50 159 innovation and the other Prescrire categories (except judgment reserved) were defined as no  
51  
52 160 therapeutic advance.  
53  
54  
55  
56  
57  
58  
59  
60



161

162 If both the PMPRB and Prescrire evaluated the drug and the ratings were discordant, i.e., one  
 163 said it was not innovative and one said it was, the drug was still considered innovative. Table  
 164 1 shows that there is substantial agreement among the definitions used by Health Canada, the  
 165 PMPRB and Prescrire in assessing therapeutic innovation. Ratings were current for PMPRB  
 166 as of December 31, 2016 (the annual report for 2017 was not available at the time of writing)  
 167 and for Prescrire as of February 20, 2018.

168 **Table 1: Criteria used by Health Canada in determination of priority review or Notice**  
 169 **of Compliance with conditions pathway and by Human Drug Advisory Panel and**  
 170 **Prescrire in determining innovation status**  
 171

| <b>Health Canada – criteria for priority review and NOC/c* pathway</b>                                                                                                                                                                                                                                                                   | <b>Human Drug Advisory Panel of Patented Medicine Prices Review Board – criteria for breakthrough and substantial improvement</b> | <b>Prescrire – criteria for bravo and a real advance</b>                                    |
|------------------------------------------------------------------------------------------------------------------------------------------------------------------------------------------------------------------------------------------------------------------------------------------------------------------------------------------|-----------------------------------------------------------------------------------------------------------------------------------|---------------------------------------------------------------------------------------------|
| Priority review: A serious, life-threatening or severely debilitating illness or condition for which there is substantial evidence of clinical effectiveness that the drug provides: effective treatment, prevention or diagnosis of a disease or condition for which no drug is presently marketed in Canada                            | Breakthrough = first drug product to treat effectively a particular illness                                                       | Bravo = major therapeutic innovation in an area where previously no treatment was available |
| Priority review: A serious, life-threatening or severely debilitating illness or condition for which there is substantial evidence of clinical effectiveness that the drug provides: significant increase in efficacy and/or significant decrease in risk such that the overall benefit/risk profile is improved over existing therapies | Substantial improvement = provides a substantial improvement over existing drug products                                          | A real advance = product is an important therapeutic innovation but has certain limitations |

|                                                                                                                                                                             |  |  |
|-----------------------------------------------------------------------------------------------------------------------------------------------------------------------------|--|--|
| <p>NOC/c pathway: Provides patients suffering from serious, life threatening or severely debilitating diseases or conditions with earlier access to promising new drugs</p> |  |  |
|-----------------------------------------------------------------------------------------------------------------------------------------------------------------------------|--|--|

172

173 Adapted from: [9]

174 \*Notice of Compliance with conditions

175

176 *Data analysis*

177 The number and percent of drugs approved through the standard, priority and NOC/c

178 pathways were calculated for each year and for the 22-year period.

179

180 Kappa values were used to compare the review status from Health Canada to the assessments

181 for the same drug from the PMPRB and/or Prescrire for each year and for the 22-year period.

182 Drugs approved through the priority review and NOC/c pathways were analyzed together as a

183 single group. Kappa scores measure whether there is more or less agreement between

184 different evaluations than would be expected by chance. Levels of agreement were graded in

185 accordance with the recommendations of Landis and Koch where &lt; 0 indicates no agreement,

186 0 – 0.20 slight agreement, 0.21 – 0.40 fair agreement, 0.41 – 0.60 moderate agreement, 0.61 –

187 0.80 substantial agreement, and 0.81–1.0 almost perfect agreement [10].

188

189 *Subgroup analyses*

190 The number and percent of small molecule drugs and biologics approved through the

191 standard, priority and NOC/c pathways were calculate and compared using the Chi-square

192 statistic. Similarly, the Kappa values were calculated separately for small molecule drugs and

193 biologics.

194

1  
2  
3 195 All drugs were categorized using the second level of the World Health Organization (WHO)  
4  
5 196 Anatomical Therapeutic Chemical (ATC) classification system [11]. Drugs in three therapeutic  
6  
7 197 groups – antineoplastic agents (L01), antivirals for systemic use (J05) and immunosuppressants  
8  
9 198 (L04) – were chosen for subgroup analyses because they are primarily used for serious life-  
10  
11 199 threatening diseases and because there are sufficient numbers in each group to allow for  
12  
13 200 statistical analyses. The number and percent of each subgroup that received an expedited  
14  
15 201 review was calculated as were the Kappa values on a drug-by-drug basis and for drugs in the  
16  
17 202 “all other therapeutic groups”. Distribution of approval pathways in the subgroups individually  
18  
19 203 and for the three subgroups combined versus all other therapeutic groups was compared using  
20  
21 204 the Chi-square statistic. Calculations were done using Excel 2016 for Macintosh (Microsoft)  
22  
23 205 and Prism 7.0 (GraphPad Software).  
24

25 206

### 27 207 *Patient and public involvement*

28  
29  
30 208 No patients were involved in any aspect of this study.  
31

32 209

### 34 210 *Ethics*

35  
36 211 No patients were involved in this study and only publicly available data was gathered.  
37

38 212 Therefore, ethics approval was not required.  
39

40 213

## 42 214 **Results**

### 44 215 *Review status*

45  
46  
47 216 From January 1, 1995 to December 31, 2016 Health Canada approved a total of 623 NAS. Of  
48  
49 217 these, 438 (70.3%) went through the standard pathway, 152 (24.4%) the priority pathway and  
50  
51 218 33 (5.3%) received a NOC/c. Almost 30 percent (29.7%) went through the expedited review  
52  
53 219 pathways over the entire period, varying from a low of 9.1% in 2010 to a high of 47.8% in  
54  
55 220 2006 (Table 2). (Health Canada used both a priority and NOC/c approval for 11 drugs, data  
56  
57  
58  
59  
60

221 not shown.) Figure 1 shows that there is no trend to using expedited review pathways more  
 222 liberally or more conservatively over the time period. (Supplementary Tables 1 & 2, drugs  
 223 with and without therapeutic evaluations, respectively, give all of the data extracted for the  
 224 623 drugs in question.)

225  
 226  
 227

**Table 2: Review status of new active substances approved 1995-2016**

| Year         | Number of new active substances approved | Number (%) with standard review | Number (%) with priority review | Number (%) with NOC/c* | Number (%) with any expedited pathway review |
|--------------|------------------------------------------|---------------------------------|---------------------------------|------------------------|----------------------------------------------|
| 1995         | 30                                       | 26 (86.7)                       | 4 (13.3)                        | --                     | 4 (13.3)                                     |
| 1996         | 33                                       | 24 (72.7)                       | 9 (27.3)                        | --                     | 9 (27.3)                                     |
| 1997         | 42                                       | 34 (81.0)                       | 8 (19.0)                        | --                     | 8 (19.0)                                     |
| 1998         | 30                                       | 26 (86.7)                       | 2 (6.7)                         | 2 (6.7)                | 4 (13.3)                                     |
| 1999         | 36                                       | 24 (66.7)                       | 12 (33.3)                       | 0 (0)                  | 12 (33.3)                                    |
| 2000         | 26                                       | 15 (57.7)                       | 11 (42.3)                       | 0 (0)                  | 11 (42.3)                                    |
| 2001         | 27                                       | 17 (63.0)                       | 9 (33.3)                        | 1 (3.7)                | 10 (37.0)                                    |
| 2002         | 24                                       | 20 (83.3)                       | 4 (16.7)                        | 0 (0)                  | 4 (16.7)                                     |
| 2003         | 20                                       | 12 (60.0)                       | 8 (40.0)                        | 0 (0)                  | 8 (40.0)                                     |
| 2004         | 29                                       | 19 (65.5)                       | 9 (31.0)                        | 1 (3.4)                | 10 (34.5)                                    |
| 2005         | 24                                       | 13 (54.2)                       | 10 (41.7)                       | 1 (4.2)                | 11 (45.8)                                    |
| 2006         | 23                                       | 12 (52.2)                       | 9 (39.1)                        | 2 (8.7)                | 11 (47.8)                                    |
| 2007         | 24                                       | 14 (58.3)                       | 7 (29.2)                        | 3 (12.5)               | 10 (41.7)                                    |
| 2008         | 17                                       | 11 (64.7)                       | 2 (11.8)                        | 4 (23.5)               | 6 (35.3)                                     |
| 2009         | 27                                       | 21 (77.8)                       | 6 (22.2)                        | 0 (0)                  | 6 (22.2)                                     |
| 2010         | 22                                       | 20 (90.9)                       | 2 (9.1)                         | 0 (0)                  | 2 (9.1)                                      |
| 2011         | 27                                       | 21 (77.8)                       | 6 (22.2)                        | 0 (0)                  | 6 (22.2)                                     |
| 2012         | 23                                       | 16 (69.6)                       | 5 (21.7)                        | 2 (8.7)                | 7 (30.4)                                     |
| 2013         | 39                                       | 28 (71.8)                       | 9 (23.1)                        | 2 (5.1)                | 11 (28.2)                                    |
| 2014         | 25                                       | 18 (72.0)                       | 6 (24.0)                        | 1 (4.0)                | 7 (28.0)                                     |
| 2015         | 37                                       | 25 (67.6)                       | 5 (13.5)                        | 7 (18.9)               | 12 (32.4)                                    |
| 2016         | 38                                       | 21 (55.3)                       | 10 (26.3)                       | 7 (18.4)               | 17 (44.7)                                    |
| <b>Total</b> | 623                                      | 438 (70.3)                      | 152 (24.4)                      | 33 (5.3)               | 185 (29.7)                                   |

228  
 229  
 230  
 231

\*Notice of Compliance with conditions  
 †Patented Medicine Prices Review Board

232 There were 126 biologics approved versus 323 small molecules (data only available from  
 233 2000 onward). There was no difference in the distribution of the approval pathways ( $p =$   
 234 0.4867) (Table 3). There were 81 approvals for antineoplastic agents, 47 for antivirals for  
 235 systemic use, 36 for immunosuppressants and 365 for drugs in the “all other 68 therapeutic  
 236 groups” (Supplementary Table 1). The distribution of approval pathways was significantly  
 237 different for the three subgroups ( $p = 0.0018$ ) and for the three subgroups combined versus  
 238 “all other therapeutic groups” ( $p < 0.00001$ ) (Table 3).

239 **Table 3: Subgroup comparison of review pathways**

| Subgroup                        | Standard | Priority | Notice of compliance with conditions | Total |
|---------------------------------|----------|----------|--------------------------------------|-------|
| Small molecules                 | 129      | 72       | 22                                   | 323   |
| Biologics                       | 73       | 45       | 8                                    | 126   |
| Antineoplastic agents           | 34       | 26       | 21                                   | 81    |
| Antivirals for systemic use     | 16       | 26       | 5                                    | 47    |
| Immunosuppressants              | 22       | 13       | 1                                    | 36    |
| All other 68 therapeutic groups | 365      | 89       | 5                                    | 459   |

241  
 242 Small molecules vs. biologics: chi-square = 1.4402 ( $p = 0.4867$ )  
 243 Antineoplastics vs. antivirals vs. immunosuppressants: chi-square = 17.1978 ( $p = 0.0018$ )  
 244 Antineoplastics + antivirals + immunosuppressants vs. all other therapeutic groups: chi-  
 245 square = 97.4874 ( $p < 0.00001$ )  
 246

#### 247 *Therapeutic value*

248 Out of the 623 NAS, 509 (81.7%) were evaluated for their therapeutic innovation either by  
 249 the PMPRB and/or Prescrire. Health Canada used an expedited review pathway for 159 of the  
 250 509 drugs whereas only 55 were judged to be therapeutically innovative by one or both of the  
 251 independent reviews. Forty-two of the 55 drugs that were therapeutic innovations received an  
 252 expedited review, 13 received a standard review and 117 (159 – 42) that were not therapeutic  
 253 innovations also received an expedited review (Table 4). The Kappa value for the entire

254 period for all 509 drugs was 0.276 (95% CI 0.194, 0.359) or fair. Figure 2 presents the Kappa  
 255 values for each year which generally ranged from 0 (slight) to 0.4 (fair).

256

257

258 **Table 4: Number of new active substances with an expedited review and therapeutically**  
 259 **innovative rating**

260

| Year      | Number (%) of NAS* with a therapeutic assessment from Patented Medicine Prices Review Board and/or Prescribe | Number of NAS with an expedited review | Number of NAS rated as therapeutic innovation by either Patented Medicine Prices Review Board and/or Prescribe | Number of therapeutically innovative NAS with an expedited review |
|-----------|--------------------------------------------------------------------------------------------------------------|----------------------------------------|----------------------------------------------------------------------------------------------------------------|-------------------------------------------------------------------|
| 1995      | 22 (73.3)                                                                                                    | 3                                      | 1                                                                                                              | 0                                                                 |
| 1996      | 20 (60.6)                                                                                                    | 5                                      | 4                                                                                                              | 3                                                                 |
| 1997      | 24 (57.1)                                                                                                    | 4                                      | 4                                                                                                              | 2                                                                 |
| 1998      | 24 (80.0)                                                                                                    | 4                                      | 1                                                                                                              | 0                                                                 |
| 1999      | 31 (86.1)                                                                                                    | 10                                     | 1                                                                                                              | 0                                                                 |
| 2000      | 20 (76.9)                                                                                                    | 9                                      | 4                                                                                                              | 4                                                                 |
| 2001      | 23 (85.2)                                                                                                    | 8                                      | 1                                                                                                              | 1                                                                 |
| 2002      | 20 (83.3)                                                                                                    | 4                                      | 0                                                                                                              | 0                                                                 |
| 2003      | 19 (95.0)                                                                                                    | 8                                      | 2                                                                                                              | 2                                                                 |
| 2004      | 26 (89.7)                                                                                                    | 9                                      | 3                                                                                                              | 3                                                                 |
| 2005      | 21 (87.5)                                                                                                    | 9                                      | 3                                                                                                              | 2                                                                 |
| 2006      | 21 (91.3)                                                                                                    | 9                                      | 3                                                                                                              | 2                                                                 |
| 2007      | 22 (91.7)                                                                                                    | 9                                      | 3                                                                                                              | 3                                                                 |
| 2008      | 15 (88.2)                                                                                                    | 6                                      | 2                                                                                                              | 2                                                                 |
| 2009      | 26 (96.3)                                                                                                    | 7                                      | 0                                                                                                              | 0                                                                 |
| 2010      | 19 (86.4)                                                                                                    | 2                                      | 2                                                                                                              | 2                                                                 |
| 2011      | 23 (85.3)                                                                                                    | 5                                      | 2                                                                                                              | 2                                                                 |
| 2012      | 21 (91.3)                                                                                                    | 6                                      | 3                                                                                                              | 2                                                                 |
| 2013      | 36 (92.3)                                                                                                    | 11                                     | 6                                                                                                              | 3                                                                 |
| 2014      | 22 (88.0)                                                                                                    | 6                                      | 3                                                                                                              | 2                                                                 |
| 2015      | 30 (81.1)                                                                                                    | 12                                     | 4                                                                                                              | 4                                                                 |
| 2016      | 24 (63.2)                                                                                                    | 13                                     | 3                                                                                                              | 3                                                                 |
| 1995-2016 | 509 (81.7)                                                                                                   | 159                                    | 55                                                                                                             | 42                                                                |

261

262 \*New active substance

263 †Number of drugs rated as innovative as a percent of all drugs given an expedited approval  
 264 review by Health Canada

265 ‡Number of drugs rated as not therapeutically innovative as a percent of all drugs given a  
 266 standard review by Health Canada

267

268 There were 286 and 99 small molecule drugs and biologics, respectively, with therapeutic  
 269 ratings. The Kappa values were 0.313 (95% CI 0.205, 0.420) (fair) and 0.233 (95% CI 0.061,  
 270 0.405) (fair), respectively. The overlapping 95% CIs indicate no difference in the Kappa  
 271 values between the two groups (Table 5).

272 **Table 5: Subgroup analyses: Kappa values**

| Subgroup                     | Number (%) | Kappa value (95% CI) |
|------------------------------|------------|----------------------|
| Small molecule drugs         | 286        | 0.313 (0.205, 0.420) |
| Biologics                    | 99         | 0.233 (0.061, 0.405) |
| Antineoplastic agents        | 71         | 0.091 (0.017, 0.200) |
| Antivirals for systemic use  | 46         | 0.122 (0.011, 0.233) |
| Immunosuppressants           | 35         | 0.376 (0.075, 0.675) |
| All other therapeutic groups | 357        | 0.385 (0.263, 0.506) |

274  
 275 The 509 drugs were in 58 different second level ATC groups (drugs in 13 ATC groups did  
 276 not have therapeutic evaluations): antineoplastic agents (71), antivirals for systemic use (46),  
 277 immunosuppressants (35) and “all other therapeutic groups” (357) (Supplementary Table 1).  
 278 Kappa values for the four groups were: 0.091 (95% CI 0.017, 0.200) (slight), 0.122  
 279 (95% CI 0.011, 0.233) (slight), 0.376 (95% CI 0.075, 0.675) (fair) and (95% CI 0.263,  
 280 0.506)0.385 (fair), respectively. The 95% CIs for the Kappa values for the antineoplastic  
 281 agents, antivirals for systemic use and immunosuppressants overlapped indicating no  
 282 difference among the groups but there was no overlap of any of these with the 95% CI for  
 283 “all other therapeutic groups”. Drugs in the three therapeutic subgroups were much less likely  
 284 to receive a standard review than were drugs in “all other therapeutic groups”, 43.7% versus  
 285 79.3% (data not shown).

286

1  
2  
3 287 **Discussion**

4  
5 288 Almost 30% of the 623 new active substances that Health Canada reviewed between 1995  
6  
7 289 and 2016 went through at least one of two expedited review pathways – priority review or  
8  
9 290 NOC/c, primarily a priority review. There is no difference between small molecule drugs and  
10  
11 291 biologics in the approval pathways used indicating that for these two groups Health Canada  
12  
13 292 does not see one or the other being more likely to offer significant new therapeutic benefits.  
14  
15 293 However, the same is not true for the therapeutic subgroups. Drugs in the three specifically  
16  
17 294 examined – antineoplastics, antivirals and immunosuppressants – were collectively more  
18  
19 295 likely to be assigned to an expedited review pathway (56%) compared to drugs in “all other  
20  
21 296 therapeutic groups” (20.5%), possibly because of the nature of the diseases that they treat.  
22  
23

24 297

25  
26 298 Just over 80% of the NAS approved had been assessed by the PMPRB and/or Prescrire for  
27  
28 299 their therapeutic benefit. The Kappa value for the 509 drugs was 0.276 meaning that Health  
29  
30 300 Canada’s ability to predict major therapeutic gain from these drugs was only fair.

31  
32 301 Furthermore, almost 25% (13/55) of the drugs that were therapeutic innovations did not  
33  
34 302 receive an expedited review underscoring that Health Canada is not reliably able to predict  
35  
36 303 which drugs will offer major therapeutic gains. The relatively low Kappa value may relate to  
37  
38 304 when Health Canada makes its decision about what type of approval pathway to use. This  
39  
40 305 assignment is at the start of the review process when all of the data will not have been fully  
41  
42 306 assessed. In contrast, the PMPRB and Prescrire make their assessments after the drug has  
43  
44 307 been marketed when more information about efficacy and safety is available.  
45  
46

47 308

48  
49 309 As was the case with the assignment of an expedited review pathway, there is no difference  
50  
51 310 in how accurately Health Canada predicts the therapeutic value of small molecule drugs and  
52  
53 311 biologics as measured by Kappa values. The Kappa value for drugs in “all other therapeutic  
54  
55  
56  
57  
58  
59  
60



1  
2  
3 312 groups” is higher than the value for drugs in the antineoplastic, antiviral and  
4  
5 313 immunosuppressant groups. This difference may be because Health Canada is better able to  
6  
7 314 predict these drugs are less likely to be therapeutic innovations than drugs in the  
8  
9 315 antineoplastic, antiviral and immunosuppressant groups. Out of the 357 drugs that had  
10  
11 316 therapeutic evaluations in the “all other therapeutic groups,” 79.3% received a standard  
12  
13 317 review compared to 43.7% of the 151 drugs in the three therapeutic subgroups.  
14  
15  
16 318  
17  
18 319 How Health Canada uses its expedited review pathways is important for a number of reasons.  
19  
20 320 First, their use may explicitly create an impression among clinicians and patients that these  
21  
22 321 drugs are likely to deliver major new therapeutic benefits despite the fact that the likelihood  
23  
24 322 that they will is only “fair” as measured by the Kappa value. Second, the NOC/c pathway  
25  
26 323 requires companies to commit to conducting post-market studies to validate the efficacy of  
27  
28 324 the product, but many of these studies are delayed [6, 7], leaving clinicians and patients  
29  
30 325 uncertain about the value of these products. In at least one case, Health Canada did not  
31  
32 326 suspend the sale of a drug and allowed it to stay on the market despite not fulfilling the  
33  
34 327 conditions required under its NOC/c. In December 2003, Iressa (gefitinib) was approved as a  
35  
36 328 third-line treatment for non-small cell lung cancer on the condition that the company submit a  
37  
38 329 study showing that it improved survival [12]. When the study results were submitted to  
39  
40 330 Health Canada they showed no survival benefit for gefitinib compared to placebo [13].  
41  
42 331 Health Canada recognized that the conditions had not been fulfilled, but rather than removing  
43  
44 332 gefitinib from the market, in February 2005 it elected to allow it to continue to be sold [12].  
45  
46 333 In 2009, the drug was deemed to have met its conditions after a new study showed non-  
47  
48 334 inferiority, i.e., survival after taking it was no worse compared to another chemotherapeutic  
49  
50 335 agent [14]. Third, although the priority and standard approval pathways are equivalent in  
51  
52 336 terms of the amount of data reviewed, the former is done in 180 days compared to 300 days  
53  
54  
55  
56  
57  
58  
59  
60

1  
2  
3 337 for the latter, meaning that the priority pathway is more resource intensive possibly drawing  
4  
5 338 resources from other Health Canada activities. Finally, drugs reviewed through both  
6  
7 339 expedited review pathways are more likely to receive safety warnings once they are on the  
8  
9 340 market compared to drugs with a standard approval [2, 15].  
10

11 341

12  
13 342 As Figure 1 indicates, Health Canada is not using the expedited review pathways more  
14  
15 343 liberally (or more conservatively) over time, but as Figure 2 shows it has not improved its  
16  
17 344 ability to predict therapeutic innovation over the 22 years evaluated in this study. The  
18  
19 345 Introduction describes the criteria that Health Canada uses to assign a drug to either a priority  
20  
21 346 review or a NOC/c review but how those criteria are applied and whether Health Canada  
22  
23 347 periodically reviews its performance are not known.  
24  
25

26 348

27  
28 349 Contrary to the situation in the United States (US) where the Food and Drug Administration  
29  
30 350 (FDA) has been using an increasing number of expedited development or review programs,  
31  
32 351 Health Canada's use of its programs has been relatively stable since 1995. Between 1987 and  
33  
34 352 2014, 43% received a priority review from the FDA and 19% were approved through the fast  
35  
36 353 track program which approximately corresponds to a NOC/c [16]. (Drugs could be associated  
37  
38 354 with both programs.) However, when it comes to approving oncology drugs through an  
39  
40 355 expedited pathway, Health Canada is only marginally better than the FDA. In the US, only 1  
41  
42 356 of 15 (6.7%) oncology drugs approved through an expedited program from January 1, 2008,  
43  
44 357 through December 31, 2012 had a proven survival benefit compared to the other 6 and 8 that  
45  
46 358 either had no overall survival benefit or an unknown benefit, respectively [17]. In this current  
47  
48 359 study, out of 42 antineoplastic agents that Health Canada gave an expedited review, only 6  
49  
50 360 (14.3%) were rated as therapeutically innovative. The European Medicines Agency (EMA)  
51  
52 361 does not have the equivalent of a priority review but its exceptional conditions (EC) and  
53  
54  
55  
56  
57  
58  
59  
60

1  
2  
3 362 conditional approvals (CA) pathways are roughly equivalent to a NOC/c. These were used  
4  
5 363 for 12.5% (70/558) new drugs it approved from 1995 to 2009 [18], while Health Canada used  
6  
7 364 a NOC/c for 5.3% (33/623) approvals between 1995 and 2016.  
8

9 365

### 11 366 *Limitations*

13 367 Almost 20% of new drugs approved by Health Canada were not evaluated for their  
14  
15 368 therapeutic innovation by either the PMPRB or La revue Prescrire. The absence of these  
16  
17 369 evaluations may have skewed the Kappa values in either a more positive or more negative  
18  
19 370 direction. The lack of the availability of reports from Health Canada reviewers means that the  
20  
21 371 reasons why drugs were assigned to a specific review pathway cannot be evaluated.  
22  
23

24 372

### 26 373 **Conclusion**

28 374 Health Canada continues to use expedited review pathways for about 30% of new drugs.  
29  
30 375 Other regulatory authorities such as the Australian Therapeutic Goods Administration and the  
31  
32 376 EMA are in the process of either implementing or expanding expedited review pathways [19-  
33  
34 377 21] and should study the example of what has happened in Canada. The rationale for using  
35  
36 378 expedited review pathways is to get important therapeutic advances to patients in a timely  
37  
38 379 manner, but Health Canada's ability to predict which of these drugs will fulfill this  
39  
40 380 expectation has not improved over a 22-year period and remains relatively low. Moreover,  
41  
42 381 use of these pathways comes with both health related and resource costs. The findings in this  
43  
44 382 study should provoke a discussion about whether Health Canada should continue to use these  
45  
46 383 pathways and if so how their use can be improved.  
47  
48  
49  
50  
51  
52  
53  
54  
55  
56  
57  
58  
59

1  
2  
3 384 **Figure 1 legend**

4  
5 385 Grey – Percent with Notice of Compliance with conditions

6 386

7 387 Orange – Percent with priority

8 388

9 389 Blue – Percent with standard

10 390

11  
12 391 **Figure 2 legend**

13  
14 392 Kappa values:

15  
16 393 < 0 = no agreement

17 394

18 395 0 – 0.20 = slight agreement

19 396

20 397 0.21 – 0.40 = fair agreement

21 398

22 399 0.41 – 0.60 = moderate agreement

23 400

24 401 0.61 – 0.80 = substantial agreement

25 402

26 403 0.81 – 1.0 = almost perfect agreement

27 404

28  
29 405  
30  
31  
32  
33  
34  
35  
36  
37  
38  
39  
40  
41  
42  
43  
44  
45  
46  
47  
48  
49  
50  
51  
52  
53  
54  
55  
56  
57  
58  
59  
60

406 **References**

- 407 1. Health Products and Food Branch. Access to therapeutic products: the regulatory  
408 process in Canada Ottawa: Health Canada; 2006 [cited 2014 July 20]. Available from:  
409 [http://publications.gc.ca/collections/collection\\_2007/hc-sc/H164-9-2006E.pdf](http://publications.gc.ca/collections/collection_2007/hc-sc/H164-9-2006E.pdf).
- 410 2. Lexchin J. Post-market safety warnings for drugs approved in Canada under the  
411 Notice of Compliance with conditions policy. *British Journal of Clinical Pharmacology*.  
412 2015;79:847-59.
- 413 3. Health Canada: Health Products and Food Branch. Guidance for industry: priority  
414 review of drug submissions. Ottawa: 2009.
- 415 4. Health Canada. Notice of compliance with conditions (NOC/c). Ottawa: 2002.
- 416 5. Lexchin J. Health Canada's use of its priority review process for new drugs: a cohort  
417 study. *BMJ Open*. 2015;5:e006816.
- 418 6. Lexchin J. Notice of compliance with conditions: a policy in limbo. *Healthcare*  
419 *Policy*. 2007;2:114-22.
- 420 7. Law M. The characteristics and fulfillment of conditional prescription drug approvals  
421 in Canada. *Health Policy*. 2014;116:154-61.
- 422 8. Prescrire Editorial Staff. Prescrire's ratings system: gauge the usefulness of new  
423 products at a glance Paris2011 [cited 2015 March 11]. Available from:  
424 <http://english.prescrire.org/en/81/168/46800/0/NewsDetails.aspx>.
- 425 9. Lexchin J. Postmarket safety in Canada: are significant therapeutic advances and  
426 biologics less safe than other drugs? A cohort study. *BMJ Open*. 2014;4:e004289.
- 427 10. Landis JR, Koch GG. The measurement of observer agreement for categorical data.  
428 *Biometrics*. 1977;33:159-74.

- 1  
2  
3 429 11. WHO Collaborating Centre for Drug Statistics Methodology, Norwegian Institute of  
4  
5 430 Public Health. Structure and principles 2011 [cited 2018 February 20]. Available from:  
6  
7 431 [http://www.whooc.no/atc/structure\\_and\\_principles/](http://www.whooc.no/atc/structure_and_principles/).  
8  
9 432 12. Health Canada. Clarification from Health Canada regarding the status of Iressa®  
10  
11 433 (gefitinib) in Canada Ottawa2005 [cited 2014 October 20]. Available from: [http://www.hc-](http://www.hc-sc.gc.ca/dhp-mpps/prodpharma/activit/fs-fi/fact_iressa-eng.php)  
12  
13 434 [sc.gc.ca/dhp-mpps/prodpharma/activit/fs-fi/fact\\_iressa-eng.php](http://www.hc-sc.gc.ca/dhp-mpps/prodpharma/activit/fs-fi/fact_iressa-eng.php).  
14  
15 435 13. Thatcher N, Chang A, Parikh P, Pereira J, Ciuleanu T, von Pawel J, et al. Gefitinib  
16  
17 436 plus best supportive care in previous treated patients with refractory advanced non-small-cell  
18  
19 437 lung cancer: results from a randomised, placebo-controlled, multicentre study (Iressa  
20  
21 438 Survival Evaluation in Lung Cancer). *Lancet*. 2005;366:1527-37.  
22  
23 439 14. Kim E, Hirsh V, Mok T, Socinski M, Gervais R, Wu Y-L, et al. Gefitinib versus  
24  
25 440 docetaxel in previously treated non-small-cell lung cancer (INTEREST): a randomised phase  
26  
27 441 III trial. *Lancet*. 2008;372:1809-18.  
28  
29 442 15. Lexchin J. New drugs and safety: what happened to new active substances approved  
30  
31 443 in Canada between 1995 and 2010? *Archives of Internal Medicine*. 2012;172:1680-1.  
32  
33 444 16. Kesselheim A, Wang B, Franklin J, Darrow J. Trends in utilization of FDA expedited  
34  
35 445 drug development and approval programs, 1987-2014: cohort study. *BMJ*. 2015;351:h4633.  
36  
37 446 17. Kim C, Prasad V. Cancer drugs approved on the basis of a surrogate end point and  
38  
39 447 subsequent overall survival: an analysis of 5 years of US Food and Drug Administration  
40  
41 448 approvals. *JAMA Internal Medicine*. 2015;175:1992-4.  
42  
43 449 18. Boon W, Moors E, Meijer A, Schellekens H. Conditional approval and approval  
44  
45 450 under exceptional circumstances as regulatory instruments for stimulating responsible drug  
46  
47 451 innovation in Europe. *Clinical Pharmacology & Therapeutics*. 2010;88:848-53.  
48  
49 452 19. European Medicines Agency. Final report on the adaptive pathways pilot. London:  
50  
51 453 2016.  
52  
53  
54  
55  
56  
57  
58  
59  
60

1  
2  
3 454 20. Department of Health Therapeutic Goods Administration. Consultation: provisional  
4  
5 455 approval pathway for prescription medicines. Proposed registration process and post-market  
6  
7 456 requirements. Woden, ACT: 2017.

8  
9 457 21. Department of Health Therapeutic Goods Administration. Consultation: expedited  
10  
11 458 pathways for prescription medicines. Eligibility criteria and designation process. Woden,  
12  
13 459 ACT: 2016.

14  
15  
16 460

17  
18  
19  
20  
21  
22  
23  
24  
25  
26  
27  
28  
29  
30  
31  
32  
33  
34  
35  
36  
37  
38  
39  
40  
41  
42  
43  
44  
45  
46  
47  
48  
49  
50  
51  
52  
53  
54  
55  
56  
57  
58  
59  
60

For peer review only

1  
2  
3  
4  
5  
6  
7  
8  
9  
10  
11  
12  
13  
14  
15  
16  
17  
18  
19  
20  
21  
22  
23  
24  
25  
26  
27  
28  
29  
30  
31  
32  
33  
34  
35  
36  
37  
38  
39  
40  
41  
42  
43  
44  
45  
46  
47  
48  
49  
50  
51  
52  
53  
54  
55  
56  
57  
58  
59  
60

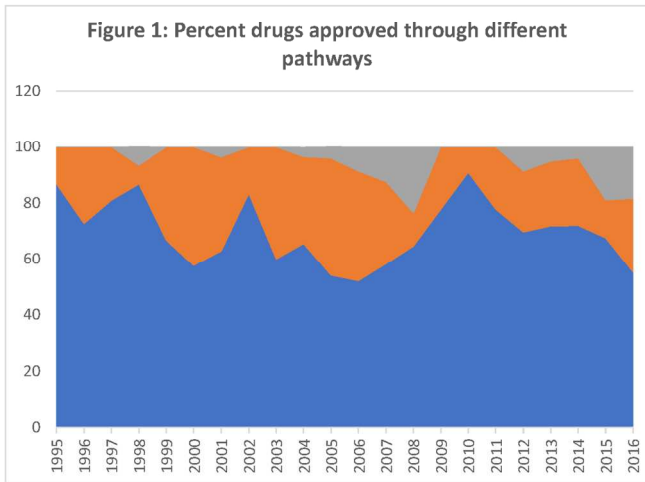

148x209mm (300 x 300 DPI)



1  
2  
3  
4  
5  
6  
7  
8  
9  
10  
11  
12  
13  
14  
15  
16  
17  
18  
19  
20  
21  
22  
23  
24  
25  
26  
27  
28  
29  
30  
31  
32  
33  
34  
35  
36  
37  
38  
39  
40  
41  
42  
43  
44  
45  
46  
47  
48  
49  
50  
51  
52  
53  
54  
55  
56  
57  
58  
59  
60

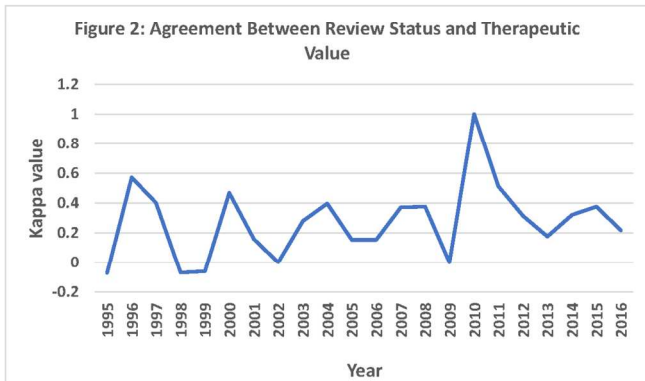

148x209mm (300 x 300 DPI)

**Supplementary Table 1: All drugs approved between 1995-2016 that received therapeutic assessments from Patented Medicine Prices Review Board and/or La revue Prescrire\***

| Generic name     | Brand name                 | PMPRB<br>breakthrough,<br>substantial<br>improvement<br>and/or<br>Prescrire<br>bravo, a real<br>advance | PMPRB<br>and/or<br>Prescrire no<br>significant<br>therapeutic<br>innovation† | Review status<br>Standard<br>Priority | Notice of<br>compliance<br>with<br>conditions | Notice of<br>compliance<br>or notice of<br>compliance<br>with<br>conditions<br>date | Small<br>molecule | Biologic | ATC group (second<br>level)              |
|------------------|----------------------------|---------------------------------------------------------------------------------------------------------|------------------------------------------------------------------------------|---------------------------------------|-----------------------------------------------|-------------------------------------------------------------------------------------|-------------------|----------|------------------------------------------|
| Adapalene        | Differin                   |                                                                                                         | 1                                                                            | 1                                     |                                               | 1995-01-24                                                                          |                   |          | anti-acne preparation                    |
| Dexrazoxane      | Zinocard                   | 1                                                                                                       |                                                                              | 1                                     |                                               | 1995-02-07                                                                          |                   |          | all other therapeutic<br>products        |
| Bambuterol       | Bambec                     |                                                                                                         | 1                                                                            | 1                                     |                                               | 1995-02-07                                                                          |                   |          | drugs for obstructive<br>airway diseases |
| Naltrexone       | Revia                      |                                                                                                         | 1                                                                            | 1                                     |                                               | 1995-03-23                                                                          |                   |          | other nervous system<br>drugs            |
| Cefprozil        | Cefzil                     |                                                                                                         | 1                                                                            | 1                                     |                                               | 1995-03-29                                                                          |                   |          | antibacterials for                       |
| Zuclopenthixol   | Clopixol                   |                                                                                                         | 1                                                                            | 1                                     |                                               | 1995-04-24                                                                          |                   |          | psycholeptics                            |
| Zuclopenthixol   | Clopixol                   |                                                                                                         | 1                                                                            | 1                                     |                                               | 1995-04-24                                                                          |                   |          | psycholeptics                            |
| Zuclopenthixol   | acuphase<br>Clopixol depot |                                                                                                         | 1                                                                            | 1                                     |                                               | 1995-04-24                                                                          |                   |          | psycholeptics                            |
| Lansoprazole     | Prevacid                   |                                                                                                         | 1                                                                            | 1                                     |                                               | 1995-05-12                                                                          |                   |          | drugs for acid related<br>disorders      |
| Cefepime         | Maxipime                   |                                                                                                         | 1                                                                            | 1                                     |                                               | 1995-06-02                                                                          |                   |          | antibacterials for<br>systemic use       |
| Interferon Beta- | Betaseron                  |                                                                                                         | 1                                                                            |                                       | 1                                             | 1995-07-19                                                                          |                   |          | immunostimulants                         |
| Famciclovir      | Famvir                     |                                                                                                         | 1                                                                            | 1                                     |                                               | 1995-07-31                                                                          |                   |          | antivirals for systemic<br>use           |
| Cefpodoxime      | Orelox                     |                                                                                                         | 1                                                                            | 1                                     |                                               | 1995-08-22                                                                          |                   |          | antibacterials for<br>svstemic use       |
| Sevoflurane      | Sevorane                   |                                                                                                         | 1                                                                            | 1                                     |                                               | 1995-09-18                                                                          |                   |          | anesthetics                              |

|    |                   |              |   |   |            |                          |
|----|-------------------|--------------|---|---|------------|--------------------------|
| 1  |                   |              |   |   |            |                          |
| 2  |                   |              |   |   |            |                          |
| 3  | Losartan          | Cozaar       | 1 | 1 | 1995-09-28 | agents acting on the     |
| 4  |                   |              |   |   |            | renin-angiotensin system |
| 5  | Iotrolan          | Osmovist 280 | 1 | 1 | 1995-10-04 | contrast media           |
| 6  | Bicalutamide      | Casodex      | 1 | 1 | 1995-11-02 | endocrine therapy        |
| 7  | Acarbose          | Prandase     | 1 | 1 | 1995-11-15 | drugs used in diabetes   |
| 8  | Mycophenolate     | Cellcept     | 1 | 1 | 1995-11-15 | immunosuppressants       |
| 9  | Tacrolimus        | Prograf      | 1 | 1 | 1995-12-06 | immunosuppressants       |
| 10 | Lamivudine        | 3TC          | 1 | 1 | 1995-12-08 | antivirals for systemic  |
| 11 |                   |              |   |   |            | use                      |
| 12 | Alendronate       | Fosamax      | 1 | 1 | 1995-12-20 | drugs for treatment of   |
| 13 |                   |              |   |   |            | bone disease             |
| 14 | Stavudine         | Zerit        | 1 | 1 | 1996-03-26 | antivirals for systemic  |
| 15 |                   |              |   |   |            | use                      |
| 16 | Acellular         | Acel-P       | 1 | 1 | 1996-03-29 | vaccines                 |
| 17 | pertussis vaccine |              |   |   |            |                          |
| 18 | adsorbed          |              |   |   |            |                          |
| 19 |                   |              |   |   |            |                          |
| 20 | Dorzolamide       | Trusopt      | 1 | 1 | 1996-04-25 | ophthalmologicals        |
| 21 | Amifostine        | Ethyol       | 1 | 1 | 1996-04-25 | all other therapeutic    |
| 22 |                   |              |   |   |            | products                 |
| 23 | Valacyclovir      | Valtrex      | 1 | 1 | 1996-05-01 | antivirals for systemic  |
| 24 |                   |              |   |   |            | use                      |
| 25 | Quinagolide       | Norprolac    | 1 | 1 | 1996-06-25 | other gynecologicals     |
| 26 | Meropenem         | Merrem       | 1 | 1 | 1996-07-02 | antibacterials for       |
| 27 |                   |              |   |   |            | systemic use             |
| 28 | Abciximab         | Reopro       | 1 | 1 | 1996-07-04 | antithrombotic agents    |
| 29 | Anastrozole       | Arimidex     | 1 | 1 | 1996-08-01 | endocrine therapy        |
| 30 | Ritonavir         | Norvir       | 1 | 1 | 1996-08-14 | antivirals for systemic  |
| 31 |                   |              |   |   |            | use                      |
| 32 | Raltitrexed       | Tomudex      | 1 | 1 | 1996-09-12 | antineoplastic agents    |
| 33 | Indinavir         | Crixivan     | 1 | 1 | 1996-09-13 | antivirals for systemic  |
| 34 |                   |              |   |   |            | use                      |
| 35 | Insulin lispro    | Humalog      | 1 | 1 | 1996-10-08 | drugs used in diabetes   |
| 36 |                   |              |   |   |            |                          |
| 37 |                   |              |   |   |            |                          |
| 38 |                   |              |   |   |            |                          |
| 39 |                   |              |   |   |            |                          |
| 40 |                   |              |   |   |            |                          |
| 41 |                   |              |   |   |            |                          |
| 42 |                   |              |   |   |            |                          |
| 43 |                   |              |   |   |            |                          |
| 44 |                   |              |   |   |            |                          |
| 45 |                   |              |   |   |            |                          |
| 46 |                   |              |   |   |            |                          |
| 47 |                   |              |   |   |            |                          |

|    |                  |             |   |   |            |                           |
|----|------------------|-------------|---|---|------------|---------------------------|
| 1  |                  |             |   |   |            |                           |
| 2  |                  |             |   |   |            |                           |
| 3  | Dirithromycin    | Dynabac     | 1 | 1 | 1996-10-28 | antibacterials for        |
| 4  |                  |             |   |   |            | systemic use              |
| 5  | Olanzapine       | Zyprexa     | 1 | 1 | 1996-10-28 | psycholeptics             |
| 6  | Nalmefene        | Revox       | 1 | 1 | 1996-11-06 | other nervous system      |
| 7  | Zolpidem         | Ambien      | 1 | 1 | 1996-11-20 | psycholeptics             |
| 8  | Desflurane       | Suprane     | 1 | 1 | 1996-12-03 | anesthetics               |
| 9  | Gemcitabine      | Gemzar      | 1 | 1 | 1996-12-23 | antineoplastic agents     |
| 10 | Ropivacaine      | Naropin     | 1 | 1 | 1996-12-24 | anesthetics               |
| 11 |                  | injections  |   |   |            |                           |
| 12 | Imiglucerase     | Cerezyme    | 1 | 1 | 1997-02-12 | other alimentary tract    |
| 13 |                  |             |   |   |            | and metabolism products   |
| 14 | Atorvastatin     | Lipitor     | 1 | 1 | 1997-02-19 | lipid modifying agents    |
| 15 | Topiramate       | Topamax     | 1 | 1 | 1997-03-06 | antiepileptics            |
| 16 | Formoterol       | Foradil dry | 1 | 1 | 1997-03-06 | drugs for obstructive     |
| 17 |                  | powder      |   |   |            | airway diseases           |
| 18 |                  | capsules    |   |   |            |                           |
| 19 | Epoprostenol     | Flolan      | 1 | 1 | 1997-03-06 | antithrombotic agents     |
| 20 | Coagulation      | Benefix     | 1 | 1 | 1997-03-21 | antihemorrhagics          |
| 21 | factor IX        |             |   |   |            |                           |
| 22 | Topotecan        | Hycamtin    | 1 | 1 | 1997-04-15 | antineoplastic agents     |
| 23 | Dolasetron       | Anzemet     | 1 | 1 | 1997-05-21 | antiemetics and           |
| 24 |                  |             |   |   |            | antinauseants             |
| 25 | Letrozole        | Femara      | 1 | 1 | 1997-05-21 | endocrine therapy         |
| 26 | Fexofenadine     | Allegra     | 1 | 1 | 1997-06-11 | antihistamines for        |
| 27 |                  |             |   |   |            | systemic use              |
| 28 | Latanoprost      | Xalatan     | 1 | 1 | 1997-06-16 | ophthalmologicals         |
| 29 | Carbetocin       | Duratocin   | 1 | 1 | 1997-06-24 | pituitary and             |
| 30 |                  |             |   |   |            | hypothalamic hormones     |
| 31 |                  |             |   |   |            | and analogues             |
| 32 | Follitropin beta | Puregon     | 1 | 1 | 1997-07-02 | sex hormones and          |
| 33 |                  |             |   |   |            | modulators of the genital |
| 34 |                  |             |   |   |            | svstem                    |
| 35 |                  |             |   |   |            |                           |
| 36 |                  |             |   |   |            |                           |
| 37 |                  |             |   |   |            |                           |
| 38 |                  |             |   |   |            |                           |
| 39 |                  |             |   |   |            |                           |
| 40 |                  |             |   |   |            |                           |
| 41 |                  |             |   |   |            |                           |
| 42 |                  |             |   |   |            |                           |
| 43 |                  |             |   |   |            |                           |
| 44 |                  |             |   |   |            |                           |
| 45 |                  |             |   |   |            |                           |
| 46 |                  |             |   |   |            |                           |
| 47 |                  |             |   |   |            |                           |

|    |                  |               |   |   |            |                          |
|----|------------------|---------------|---|---|------------|--------------------------|
| 1  |                  |               |   |   |            |                          |
| 2  |                  |               |   |   |            |                          |
| 3  | Irinotecan       | Camptosar     | 1 | 1 | 1997-07-04 | antineoplastic agents    |
| 4  | Donepezil        | Aricept       | 1 | 1 | 1997-08-12 | psychoanaleptics         |
| 5  | Ropinirole       | Requip        |   | 1 | 1997-08-19 | anti-parkinson drugs     |
| 6  | Ibandronate      | Bondronat     |   | 1 | 1997-08-27 | drugs for treatment of   |
| 7  |                  |               |   |   |            | bone disease             |
| 8  |                  |               |   |   |            | immunostimulants         |
| 9  | Glatiramer       | Copaxone for  |   | 1 | 1997-09-04 |                          |
| 10 |                  | injection     |   |   |            |                          |
| 11 | Tolcapone        | Tasmar        |   | 1 | 1997-10-08 | anti-parkinson drugs     |
| 12 | Zafirlukast      | Accolate      |   | 1 | 1997-10-21 | drugs for obstructive    |
| 13 |                  |               |   |   |            | airway diseases          |
| 14 | Valsartan        | Diovan        |   | 1 | 1997-11-03 | agents acting on the     |
| 15 |                  |               |   |   |            | renin-angiotensin system |
| 16 |                  |               |   |   |            |                          |
| 17 |                  |               |   |   |            |                          |
| 18 | Levofloxacin     | Levaquin      |   | 1 | 1997-11-14 | antibacterials for       |
| 19 |                  |               |   |   |            | systemic use             |
| 20 | Brimonidine      | Alphagan      |   | 1 | 1997-11-24 | ophthalmologicals        |
| 21 |                  | ophthalmic    |   |   |            |                          |
| 22 | Quetiapine       | Seroquel      |   | 1 | 1997-12-02 | psycholeptics            |
| 23 | Pramipexole      | Mirapex       |   | 1 | 1998-01-29 | anti-parkinson drugs     |
| 24 | Interferon Beta- | Rebif         |   | 1 | 1998-02-05 | immunostimulants         |
| 25 | Emedastine       | Emadine       |   | 1 | 1998-02-16 | ophthalmologicals        |
| 26 |                  | ophthalmic    |   |   |            |                          |
| 27 |                  |               |   |   |            |                          |
| 28 |                  |               |   |   |            |                          |
| 29 | Cerivastatin     | Baycol        |   | 1 | 1998-02-18 | lipid modifying agents   |
| 30 | Grepafloxacin    | Raxar         |   | 1 | 1998-04-09 | antibacterials for       |
| 31 |                  |               |   |   |            | systemic use             |
| 32 | Naratriptan      | Amerge        |   | 1 | 1998-04-28 | analgesics               |
| 33 | Bupropion        | Wellbutrin SR |   | 1 | 1998-04-28 | psychoanaleptics         |
| 34 | Irbesartan       | Avapro        |   | 1 | 1998-06-01 | agents acting on the     |
| 35 |                  |               |   |   |            | renin-angiotensin system |
| 36 |                  |               |   |   |            |                          |
| 37 |                  |               |   |   |            |                          |
| 38 | Tamsulosin       | Flomax        |   | 1 | 1998-06-01 | urologicals              |
| 39 | Montelukast      | Singulair     |   | 1 | 1998-06-17 | drugs for obstructive    |
| 40 |                  |               |   |   |            | airway diseases          |
| 41 |                  |               |   |   |            |                          |
| 42 |                  |               |   |   |            |                          |
| 43 |                  |               |   |   |            |                          |
| 44 |                  |               |   |   |            |                          |
| 45 |                  |               |   |   |            |                          |
| 46 |                  |               |   |   |            |                          |
| 47 |                  |               |   |   |            |                          |

|    |                   |                  |   |   |   |            |                           |
|----|-------------------|------------------|---|---|---|------------|---------------------------|
| 1  |                   |                  |   |   |   |            |                           |
| 2  |                   |                  |   |   |   |            |                           |
| 3  | Delavirdine       | Rescriptor       | 1 | 1 | 1 | 1998-07-22 | antivirals for systemic   |
| 4  |                   |                  |   |   |   |            | use                       |
| 5  | Nelfinavir        | Viracept         | 1 |   | 1 | 1998-08-11 | antivirals for systemic   |
| 6  |                   |                  |   |   |   |            | use                       |
| 7  | Zolmitriptan      | Zomig            | 1 | 1 |   | 1998-08-24 | analgesics                |
| 8  | Capecitabine      | Xeloda           | 1 |   | 1 | 1998-08-31 | antineoplastic agents     |
| 9  | Nevirapine        | Viramune         | 1 | 1 | 1 | 1998-09-04 | antivirals for systemic   |
| 10 |                   |                  |   |   |   |            | use                       |
| 11 | Clopidogrel       | Plavix           | 1 | 1 |   | 1998-10-07 | antithrombotic agents     |
| 12 | Brinzolamide      | Azopt            | 1 | 1 |   | 1998-10-23 | ophthalmologicals         |
| 13 |                   | ophthalmic       |   |   |   |            |                           |
| 14 |                   | suspension       |   |   |   |            |                           |
| 15 | Raloxifene        | Evista           | 1 | 1 |   | 1998-11-06 | sex hormones and          |
| 16 |                   |                  |   |   |   |            | modulators of the genital |
| 17 |                   |                  |   |   |   |            | system                    |
| 18 | Candesartan       | Atacand          | 1 | 1 |   | 1998-11-20 | agents acting on the      |
| 19 |                   |                  |   |   |   |            | renin-angiotensin system  |
| 20 | Tolterodine       | Detrol           | 1 | 1 |   | 1998-11-20 | urologicals               |
| 21 | Varicella vaccine | Varivax          | 1 | 1 |   | 1998-12-02 | vaccines                  |
| 22 |                   |                  |   |   |   |            |                           |
| 23 | Alatrofloxacin    | Trovan (IV)      | 1 | 1 |   | 1998-12-04 | antibacterials for        |
| 24 |                   |                  |   |   |   |            | systemic use              |
| 25 | Trovafloxacin     | Trovan (tablets) | 1 | 1 |   | 1998-12-04 | antibacterials for        |
| 26 |                   |                  |   |   |   |            | systemic use              |
| 27 | Becaplermin gel   | Regranex         | 1 | 1 |   | 1998-12-30 | preparations for wounds   |
| 28 |                   |                  |   |   |   |            | and ulcers                |
| 29 | Tizanidine        | Zanaflex         | 1 | 1 |   | 1999-01-25 | muscle relaxants          |
| 30 | Penciclovir       | Denavir          | 1 | 1 |   | 1999-02-02 | antivirals for systemic   |
| 31 |                   |                  |   |   |   |            | use                       |
| 32 | Citalopram        | Celexa           | 1 | 1 |   | 1999-02-05 | psychoanaleptics          |
| 33 | Recombinant       | Niastase         | 1 |   | 1 | 1999-02-12 | antihemorrhagics          |
| 34 | factor VIIa       |                  |   |   |   |            |                           |
| 35 | Modafinil         | Alertec          | 1 | 1 |   | 1999-02-26 | psychoanaleptics          |
| 36 |                   |                  |   |   |   |            |                           |
| 37 |                   |                  |   |   |   |            |                           |
| 38 |                   |                  |   |   |   |            |                           |
| 39 |                   |                  |   |   |   |            |                           |
| 40 |                   |                  |   |   |   |            |                           |
| 41 |                   |                  |   |   |   |            |                           |
| 42 |                   |                  |   |   |   |            |                           |
| 43 |                   |                  |   |   |   |            |                           |
| 44 |                   |                  |   |   |   |            |                           |
| 45 |                   |                  |   |   |   |            |                           |
| 46 |                   |                  |   |   |   |            |                           |
| 47 |                   |                  |   |   |   |            |                           |

|    |                  |            |   |   |   |            |                          |
|----|------------------|------------|---|---|---|------------|--------------------------|
| 1  |                  |            |   |   |   |            |                          |
| 2  |                  |            |   |   |   |            |                          |
| 3  | Sildenafil       | Viagra     | 1 | 1 |   | 1999-03-08 | urologicals              |
| 4  | Recombinant-     | Infergen   |   | 1 | 1 | 1999-03-11 | immunostimulants         |
| 5  | methionyl        |            |   |   |   |            |                          |
| 6  | interferon       |            |   |   |   |            |                          |
| 7  | consensus 1      |            |   |   |   |            |                          |
| 8  | Efavirenz        | Sustiva    | 1 | 1 |   | 1999-03-19 | antivirals for systemic  |
| 9  |                  |            |   |   |   |            | use                      |
| 10 | Repaglinide      | Gluconorm  | 1 | 1 |   | 1999-04-06 | drugs used in diabetes   |
| 11 | Celecoxib        | Celebrex   | 1 |   | 1 | 1999-04-14 | antiinflammatoary and    |
| 12 |                  |            |   |   |   |            | antirheumatic products   |
| 13 | Triptorelin      | Trelstar   | 1 | 1 |   | 1999-05-06 | endocrine therapy        |
| 14 | Ancestim         | Stemgen    | 1 | 1 |   | 1999-05-20 | immunostimulants         |
| 15 | Orlistat         | Xenical    | 1 | 1 |   | 1999-06-03 | antiobesity preparations |
| 16 | Abacavir         | Ziagen     | 1 |   | 1 | 1          | antivirals for systemic  |
| 17 |                  |            |   |   |   |            | use                      |
| 18 | Eptifibatide     | Integrilin | 1 | 1 |   | 1999-06-11 | antithrombotic agents    |
| 19 | Eprosartan       | Teveten    | 1 | 1 |   | 1999-07-09 | agents acting on the     |
| 20 |                  |            |   |   |   |            | renin-angiotensin system |
| 21 |                  |            |   |   |   |            |                          |
| 22 | Cidofovir        | Vistide    | 1 | 1 |   | 1999-07-13 | antivirals for systemic  |
| 23 |                  |            |   |   |   |            | use                      |
| 24 | Rizatriptan      | Maxalt     | 1 | 1 |   | 1999-07-16 | analgesics               |
| 25 | Trastuzumab      | Herceptin  | 1 |   | 1 | 1999-08-13 | antineoplastic agents    |
| 26 | Telmisartan      | Micardis   | 1 | 1 |   | 1999-08-16 | agents acting on the     |
| 27 |                  |            |   |   |   |            | renin-angiotensin system |
| 28 |                  |            |   |   |   |            |                          |
| 29 | Risedronate      | Actonel    | 1 | 1 |   | 1999-08-18 | drugs for treatment of   |
| 30 |                  |            |   |   |   |            | bone disease             |
| 31 | Tirofiban        | Aggrastat  | 1 | 1 |   | 1999-08-19 | antithrombotic agents    |
| 32 | Icodextrin       | Extraneal  | 1 | 1 |   | 1999-09-17 | blood substitutes and    |
| 33 |                  |            |   |   |   |            | perfusion solutions      |
| 34 | Varicella zoster | Varilrix   | 1 |   | 1 | 1999-10-13 | vaccines                 |
| 35 | vaccine          |            |   |   |   |            |                          |
| 36 | Temozolomide     | Temodal    | 1 | 1 |   | 1999-10-25 | antineoplastic agents    |
| 37 |                  |            |   |   |   |            |                          |
| 38 |                  |            |   |   |   |            |                          |
| 39 |                  |            |   |   |   |            |                          |
| 40 |                  |            |   |   |   |            |                          |
| 41 |                  |            |   |   |   |            |                          |
| 42 |                  |            |   |   |   |            |                          |
| 43 |                  |            |   |   |   |            |                          |
| 44 |                  |            |   |   |   |            |                          |
| 45 |                  |            |   |   |   |            |                          |
| 46 |                  |            |   |   |   |            |                          |
| 47 |                  |            |   |   |   |            |                          |

|    |                 |            |   |   |            |            |   |                         |
|----|-----------------|------------|---|---|------------|------------|---|-------------------------|
| 1  |                 |            |   |   |            |            |   |                         |
| 2  |                 |            |   |   |            |            |   |                         |
| 3  | Rofecoxib       | Vioxx      | 1 | 1 | 1999-10-25 |            |   | antiinflammaotory and   |
| 4  |                 |            |   |   |            |            |   | antirheumatic products  |
| 5  | Zanamivir       | Relenza    | 1 | 1 | 1          | 1999-11-02 |   | antivirals for systemic |
| 6  |                 |            |   |   |            |            |   | use                     |
| 7  | Melanoma        | Melacine   | 1 | 1 | 1999-11-04 |            |   | immunostimulants        |
| 8  | theracine       |            |   |   |            |            |   |                         |
| 9  | Gadobutrol      | Gadovist   | 1 | 1 | 1999-11-08 |            |   | contrast media          |
| 10 | Dalfopristin    | Synercid   | 1 | 1 | 1999-12-10 |            |   | antibacterials for      |
| 11 |                 |            |   |   |            |            |   | systemic use            |
| 12 | Oseltamivir     | Tamiflu    | 1 | 1 | 1999-12-23 |            |   | antivirals for systemic |
| 13 |                 |            |   |   |            |            |   | use                     |
| 14 | Daclizumab      | Zenaprax   | 1 | 1 | 2000-01-04 |            | 1 | antineoplastic agents   |
| 15 | Leflunomide     | Arava      | 1 | 1 | 2000-03-16 |            | 1 | immunosuppressants      |
| 16 | Rituximab       | Rituxan    | 1 | 1 | 2000-03-17 |            | 1 | immunosuppressants      |
| 17 | Rosiglitazone   | Avandia    | 1 | 1 | 2000-03-21 |            | 1 | drugs used in diabetes  |
| 18 | Oxcarbazepine   | Trileptal  | 1 | 1 | 2000-04-13 |            | 1 | antiepileptics          |
| 19 | Rivastigmine    | Exelon     | 1 | 1 | 2000-04-13 |            | 1 | psychoanaleptics        |
| 20 | Zaleplon        | Starnoc    | 1 | 1 | 2000-05-11 |            | 1 | psycholeptics           |
| 21 | Verteporfin     | Visudyne   | 1 | 1 | 2000-05-31 |            | 1 | ophthalmologicals       |
| 22 | Cabergoline     | Dostinex   | 1 | 1 | 2000-06-30 |            | 1 | anti-parkinson drugs    |
| 23 | Exemestane      | Aromasin   | 1 | 1 | 2000-08-17 |            | 1 | endocrine therapy       |
| 24 | Pioglitazone    | Actos      | 1 | 1 | 2000-08-17 |            | 1 | drugs used in diabetes  |
| 25 | Zoledronic acid | Zometa     | 1 | 1 | 2000-08-21 |            | 1 | drugs for treatment of  |
| 26 |                 |            |   |   |            |            |   | bone disease            |
| 27 | Riluzole        | Rilutek    | 1 | 1 | 1          | 2000-08-30 | 1 | other nervous system    |
| 28 | Meloxicam       | Mobic      | 1 | 1 | 2000-08-31 |            | 1 | antiinflammaotory and   |
| 29 |                 |            |   |   |            |            |   | antirheumatic products  |
| 30 | Basiliximab     | Simulect   | 1 | 1 | 2000-09-01 |            | 1 | immunosuppressants      |
| 31 | Moxifloxacin    | Avelox     | 1 | 1 | 2000-10-19 |            | 1 | antibacterials for      |
| 32 |                 |            |   |   |            |            |   | systemic use            |
| 33 | Peginterferon   | Peg-intron | 1 | 1 | 2000-10-20 |            | 1 | immunostimulants        |
| 34 | Alfa-2b         |            |   |   |            |            |   |                         |
| 35 | Etanercept      | Enbrel     | 1 | 1 | 2000-12-01 |            | 1 | immunosuppressants      |
| 36 |                 |            |   |   |            |            |   |                         |
| 37 |                 |            |   |   |            |            |   |                         |
| 38 |                 |            |   |   |            |            |   |                         |
| 39 |                 |            |   |   |            |            |   |                         |
| 40 |                 |            |   |   |            |            |   |                         |
| 41 |                 |            |   |   |            |            |   |                         |
| 42 |                 |            |   |   |            |            |   |                         |
| 43 |                 |            |   |   |            |            |   |                         |
| 44 |                 |            |   |   |            |            |   |                         |
| 45 |                 |            |   |   |            |            |   |                         |
| 46 |                 |            |   |   |            |            |   |                         |
| 47 |                 |            |   |   |            |            |   |                         |



|    |                       |           |   |   |   |            |                                     |
|----|-----------------------|-----------|---|---|---|------------|-------------------------------------|
| 1  |                       |           |   |   |   |            |                                     |
| 2  |                       |           |   |   |   |            |                                     |
| 3  | Gadoversetamid        | Optimark  | 1 | 1 |   | 2000-12-11 | 1 contrast media                    |
| 4  | e                     |           |   |   |   |            |                                     |
| 5  | Sibutramine           | Meridia   | 1 | 1 |   | 2000-12-28 | 1 antiobesity preparations          |
| 6  | Sirolimus             | Rapamune  | 1 | 1 |   | 2001-01-05 | 1 immunosuppressants                |
| 7  | Gatifloxacin          | Tequin    | 1 | 1 |   | 2001-01-09 | 1 antibacterials for systemic use   |
| 8  |                       |           |   |   |   |            |                                     |
| 9  |                       |           |   |   |   |            |                                     |
| 10 | Glucagon, rDNA origin | Glucagon  | 1 |   | 1 | 2001-01-11 | 1 pancreatic hormones               |
| 11 |                       |           |   |   |   |            |                                     |
| 12 | Mequinol/tretinoin    | Solage    | 1 | 1 |   | 2001-01-17 | 1 other dermatological preparations |
| 13 |                       |           |   |   |   |            |                                     |
| 14 | Amprenavir            | Agenerase | 1 | 1 | 1 | 2001-03-01 | 1 antivirals for systemic use       |
| 15 |                       |           |   |   |   |            |                                     |
| 16 | Lopinavir/ritonavir   | Kaletra   | 1 |   | 1 | 2001-03-09 | 1 antivirals for systemic use       |
| 17 |                       |           |   |   |   |            |                                     |
| 18 | Linezolid             | Zyvoxam   | 1 | 1 |   | 2001-04-02 | 1 antibacterials for systemic use   |
| 19 |                       |           |   |   |   |            |                                     |
| 20 |                       |           |   |   |   |            |                                     |
| 21 | Iron                  | Venoferr  | 1 |   | 1 | 2001-04-17 | 1 antianemic preparations           |
| 22 | Doxercalciferol       | Hectorol  | 1 | 1 |   | 2001-04-30 | 1 calcium homeostasis               |
| 23 | Rabeprazole           | Pariet    | 1 | 1 |   | 2001-05-07 | 1 drugs for acid related disorders  |
| 24 |                       |           |   |   |   |            |                                     |
| 25 | Entacapone            | Comtan    | 1 | 1 |   | 2001-05-08 | 1 anti-parkinson drugs              |
| 26 | Eflornithine          | Vaniqa    | 1 | 1 |   | 2001-05-10 | 1 antiprotozoals                    |
| 27 | Mirtazapine           | Remeron   | 1 | 1 |   | 2001-05-18 | 1 psychoanaleptics                  |
| 28 | Desloratadine         | Aerius    | 1 | 1 |   | 2001-05-29 | 1 antihistamines for systemic use   |
| 29 |                       |           |   |   |   |            |                                     |
| 30 |                       |           |   |   |   |            |                                     |
| 31 | Infliximab            | Remicade  | 1 | 1 |   | 2001-06-06 | 1 immunosuppressants                |
| 32 | Caspofungin           | Cancidas  | 1 |   | 1 | 2001-07-29 | 1 antimycotics for systemic use     |
| 33 |                       |           |   |   |   |            |                                     |
| 34 |                       |           |   |   |   |            |                                     |
| 35 | Galantamine           | Reminyl   | 1 | 1 |   | 2001-07-31 | 1 psychoanaleptics                  |
| 36 | Esomeprazole          | Nexium    | 1 | 1 |   | 2001-08-17 | 1 drugs for acid related disorders  |
| 37 |                       |           |   |   |   |            |                                     |
| 38 | Imatinib              | Gleevec   |   |   | 1 | 2001-09-20 | 1 antineoplastic agents             |
| 39 | Tenecteplase          | Tnkase    | 1 | 1 |   | 2001-10-17 | 1 antithrombotic agents             |
| 40 | Travoprost            | Travatan  | 1 | 1 |   | 2001-11-09 | 1 ophthalmologicals                 |
| 41 |                       |           |   |   |   |            |                                     |
| 42 |                       |           |   |   |   |            |                                     |
| 43 |                       |           |   |   |   |            |                                     |
| 44 |                       |           |   |   |   |            |                                     |
| 45 |                       |           |   |   |   |            |                                     |
| 46 |                       |           |   |   |   |            |                                     |
| 47 |                       |           |   |   |   |            |                                     |

|    |                   |            |   |   |            |   |                           |
|----|-------------------|------------|---|---|------------|---|---------------------------|
| 1  |                   |            |   |   |            |   |                           |
| 2  |                   |            |   |   |            |   |                           |
| 3  | Bosentan          | Tracleer   | 1 | 1 | 2001-11-30 | 1 | antihypertensives         |
| 4  | Meningococcal     | Neisvac-C  | 1 | 1 | 2001-12-18 | 1 | vaccines                  |
| 5  | group C           |            |   |   |            |   |                           |
| 6  | polysaccharide,   |            |   |   |            |   |                           |
| 7  | tetanus toxoid    |            |   |   |            |   |                           |
| 8  | Glimepiride       | Amaryl     | 1 | 1 | 2002-01-25 | 1 | drugs used in diabetes    |
| 9  | Nateglinide       | Starlix    | 1 | 1 | 2002-02-13 | 1 | drugs used in diabetes    |
| 10 | Alfuzosin         | Xatral     | 1 | 1 | 2002-02-21 |   | urologicals               |
| 11 | Tegaserod         | Zelnorm    | 1 | 1 | 2002-03-12 | 1 | drugs for constipation    |
| 12 | Ganirelix         | Orgalutran | 1 | 1 | 2002-05-01 | 1 | pituitary and             |
| 13 |                   |            |   |   |            |   | hypothalamic hormones     |
| 14 | Valganciclovir    | Valcyte    | 1 | 1 | 2002-05-03 | 1 | antivirals for systemic   |
| 15 |                   |            |   |   |            |   | use                       |
| 16 | Palivizumab       | Synagis    | 1 | 1 | 2002-05-15 | 1 | immune sera and           |
| 17 |                   |            |   |   |            |   | immunoglobulins           |
| 18 | Docosanol         | Abreva     | 1 | 1 | 2002-05-24 | 1 | antibiotics and           |
| 19 |                   |            |   |   |            |   | chemotherapeutics for     |
| 20 |                   |            |   |   |            |   | dermatological use        |
| 21 | Bimatoprost       | Lumigan    | 1 | 1 | 2002-05-24 | 1 | ophthalmologicals         |
| 22 | Anakinra          | Kineret    | 1 | 1 | 2002-05-24 | 1 | immunosuppressants        |
| 23 | Moroctocog        | Refacto    | 1 | 1 | 2002-05-28 | 1 | antihemorrhagics          |
| 24 | alpha             |            |   |   |            |   |                           |
| 25 | Peginterferon     | Pegetron   | 1 | 1 | 2002-05-31 | 1 | immunostimulants          |
| 26 | Alfa-2b ribavirin |            |   |   |            |   |                           |
| 27 | Fondaparinux      | Arixtra    | 1 | 1 | 2002-06-13 | 1 | antithrombotic agents     |
| 28 | Hetastarch        | Hextend    | 1 | 1 | 2002-07-08 | 1 | blood substitutes and     |
| 29 |                   |            |   |   |            |   | perfusion solutions       |
| 30 | Darbepoetin       | Aranesp    | 1 | 1 | 2002-08-02 | 1 | antianemic preparations   |
| 31 | alpha             |            |   |   |            |   |                           |
| 32 | Norelgestromin/   | Evra       | 1 | 1 | 2002-08-20 | 1 | sex hormones and          |
| 33 | ethinyl estradiol |            |   |   |            |   | modulators of the genital |
| 34 |                   |            |   |   |            |   | system                    |
| 35 | Treprostinil      | Remodulin  | 1 | 1 | 2002-10-04 | 1 | antithrombotic agents     |
| 36 | Bivalirudin       | Angiomax   | 1 | 1 | 2002-10-09 | 1 | antithrombotic agents     |
| 37 |                   |            |   |   |            |   |                           |
| 38 |                   |            |   |   |            |   |                           |
| 39 |                   |            |   |   |            |   |                           |
| 40 |                   |            |   |   |            |   |                           |
| 41 |                   |            |   |   |            |   |                           |
| 42 |                   |            |   |   |            |   |                           |
| 43 |                   |            |   |   |            |   |                           |
| 44 |                   |            |   |   |            |   |                           |
| 45 |                   |            |   |   |            |   |                           |
| 46 |                   |            |   |   |            |   |                           |
| 47 |                   |            |   |   |            |   |                           |

|    |                  |           |   |   |   |            |   |                          |
|----|------------------|-----------|---|---|---|------------|---|--------------------------|
| 1  |                  |           |   |   |   |            |   |                          |
| 2  |                  |           |   |   |   |            |   |                          |
| 3  | Tiotropium       | Spiriva   | 1 | 1 |   | 2002-11-20 | 1 | drugs for obstructive    |
| 4  |                  |           |   |   |   |            |   | airway diseases          |
| 5  | Valdecoxib       | Betra     | 1 | 1 |   | 2002-12-11 | 1 | antiinflammatoory and    |
| 6  |                  |           |   |   |   |            |   | antirheumatic products   |
| 7  |                  |           |   |   |   |            |   | antithrombotic agents    |
| 8  | Drotrecogin Alfa | Xigris    | 1 |   |   | 2003-01-31 |   | 1                        |
| 9  | Rosuvastatin     | Crestor   |   | 1 |   | 2003-02-18 | 1 | lipid modifying agents   |
| 10 | Recombinant      | Dukoral   |   | 1 |   | 2003-02-21 |   | 1                        |
| 11 | cholera toxin B  |           |   |   |   |            |   | vaccines                 |
| 12 | subunit          |           |   |   |   |            |   |                          |
| 13 | Levetiracetam    | Keppra    |   | 1 |   | 2003-03-06 | 1 | antiepileptics           |
| 14 | Tenofovir        | Viread    |   | 1 | 1 | 2003-03-18 | 1 | antivirals for systemic  |
| 15 |                  |           |   |   |   |            |   | use                      |
| 16 | Pimecrolimus     | Elidel    |   | 1 |   | 2003-03-19 | 1 | other dermatological     |
| 17 |                  |           |   |   |   |            |   | preparations             |
| 18 | Ertapenem        | Invanz    |   | 1 |   | 2003-05-12 | 1 | antibacterials for       |
| 19 |                  |           |   |   |   |            |   | systemic use             |
| 20 | Ezetimibe        | Ezetrol   |   | 1 |   | 2003-05-12 | 1 | lipid modifying agents   |
| 21 | Telithromycin    | Ketek     |   | 1 |   | 2003-05-28 | 1 | antibacterials for       |
| 22 |                  |           |   |   |   |            |   | systemic use             |
| 23 | Enfuvirtide      | Fuzeon    | 1 |   |   | 2003-07-14 | 1 | antivirals for systemic  |
| 24 |                  |           |   |   |   |            |   | use                      |
| 25 | Dutasteride      | Avodart   |   | 1 |   | 2003-07-22 | 1 | urologicals              |
| 26 | Peginterferon    | Pegasys   |   | 1 |   | 2003-08-13 |   | 1                        |
| 27 | Alfa-2a          |           |   |   |   |            |   | immunostimulants         |
| 28 | Cetrorelix       | Cetrotide |   | 1 |   | 2003-08-13 | 1 | pituitary and            |
| 29 |                  |           |   |   |   |            |   | hypothalamic hormones    |
| 30 | Adefovir         | Hepsera   |   | 1 |   | 2003-08-27 | 1 | antivirals for systemic  |
| 31 |                  |           |   |   |   |            |   | use                      |
| 32 | Tadalafil        | Cialis    |   | 1 |   | 2003-09-17 | 1 | urologicals              |
| 33 | Almotriptan      | Axert     |   | 1 |   | 2003-10-01 | 1 | agents acting on the     |
| 34 |                  |           |   |   |   |            |   | renin-angiotensin system |
| 35 |                  |           |   |   |   |            |   |                          |
| 36 | Rasburicase      | Fasturtec |   | 1 |   | 2003-10-29 |   | 1                        |
| 37 |                  |           |   |   |   |            |   | all other therapeutic    |
| 38 |                  |           |   |   |   |            |   | products                 |
| 39 |                  |           |   |   |   |            |   |                          |
| 40 |                  |           |   |   |   |            |   |                          |
| 41 |                  |           |   |   |   |            |   |                          |
| 42 |                  |           |   |   |   |            |   |                          |
| 43 |                  |           |   |   |   |            |   |                          |
| 44 |                  |           |   |   |   |            |   |                          |
| 45 |                  |           |   |   |   |            |   |                          |
| 46 |                  |           |   |   |   |            |   |                          |
| 47 |                  |           |   |   |   |            |   |                          |

|    |                   |             |   |   |            |            |   |                           |
|----|-------------------|-------------|---|---|------------|------------|---|---------------------------|
| 1  |                   |             |   |   |            |            |   |                           |
| 2  |                   |             |   |   |            |            |   |                           |
| 3  | Atazanavir        | Reyataz     | 1 | 1 | 2003-12-05 | 1          |   | antivirals for systemic   |
| 4  |                   |             |   |   |            |            |   | use                       |
| 5  | Gefitinib         | Iressa      | 1 | 1 | 1          | 2003-12-17 | 1 | antineoplastic agents     |
| 6  | Agalsidase Beta   | Fabrazyme   | 1 | 1 | 2004-01-23 |            | 1 | other alimentary tract    |
| 7  |                   |             |   |   |            |            |   | and metabolism products   |
| 8  |                   |             |   |   |            |            |   |                           |
| 9  |                   |             |   |   |            |            |   |                           |
| 10 | Agalsidase        | Replagal    | 1 | 1 | 1          | 2004-02-06 | 1 | other alimentary tract    |
| 11 |                   |             |   |   |            |            |   | and metabolism products   |
| 12 |                   |             |   |   |            |            |   |                           |
| 13 | Fulvestrant       | Faslodex    | 1 | 1 | 2004-02-17 | 1          |   | endocrine therapy         |
| 14 | Gemifloxacin      | Factive     | 1 | 1 | 2004-03-09 | 1          |   | antibacterials for        |
| 15 |                   |             |   |   |            |            |   | systemic use              |
| 16 | Pegfilgrastim     | Neulasta    | 1 | 1 | 2004-03-12 |            | 1 | immunostimulants          |
| 17 | Vardenafil        | Levitra     | 1 | 1 | 2004-03-17 | 1          |   | urologicals               |
| 18 | Gadobenate        | Multihance  | 1 | 1 | 2004-03-31 | 1          |   | contrast media            |
| 19 | Miglustat         | Zavesca     | 1 | 1 | 2004-03-31 | 1          |   | other alimentary tract    |
| 20 |                   |             |   |   |            |            |   | and metabolism products   |
| 21 |                   |             |   |   |            |            |   |                           |
| 22 |                   |             |   |   |            |            |   |                           |
| 23 | Botulinum Toxin   | Myobloc     | 1 | 1 | 2004-04-16 |            | 1 | muscle relaxants          |
| 24 | Type B            |             |   |   |            |            |   |                           |
| 25 | Peginterferon     | Pegasys RBV | 1 | 1 | 2004-05-10 |            | 1 | immunostimulants          |
| 26 | Alfa-2A Ribavirin |             |   |   |            |            |   |                           |
| 27 |                   |             |   |   |            |            |   |                           |
| 28 |                   |             |   |   |            |            |   |                           |
| 29 | Ethinyl           | Nuvaring    | 1 | 1 | 2004-05-11 | 1          |   | sex hormones and          |
| 30 | estradiol/etonog  |             |   |   |            |            |   | modulators of the genital |
| 31 | estrel            |             |   |   |            |            |   | svstem                    |
| 32 | Pemetrexed        | Alimta      | 1 | 1 | 2004-05-21 | 1          |   | antineoplastic agents     |
| 33 | Laronidase        | Adlurazyme  | 1 | 1 | 2004-05-31 |            | 1 | other alimentary tract    |
| 34 |                   |             |   |   |            |            |   | and metabolism products   |
| 35 |                   |             |   |   |            |            |   |                           |
| 36 | Teriparatide      | Forteo      | 1 | 1 | 2004-06-03 |            | 1 | calcium homeostasis       |
| 37 | Cinacalcet        | Sensipar    | 1 | 1 | 2004-08-04 | 1          |   | calcium homeostasis       |
| 38 | Eletriptan        | Relpax      | 1 | 1 | 2004-08-05 | 1          |   | analgesics                |
| 39 |                   |             |   |   |            |            |   |                           |
| 40 |                   |             |   |   |            |            |   |                           |
| 41 |                   |             |   |   |            |            |   |                           |
| 42 |                   |             |   |   |            |            |   |                           |
| 43 |                   |             |   |   |            |            |   |                           |
| 44 |                   |             |   |   |            |            |   |                           |
| 45 |                   |             |   |   |            |            |   |                           |
| 46 |                   |             |   |   |            |            |   |                           |
| 47 |                   |             |   |   |            |            |   |                           |

|    |                 |              |   |   |   |            |                             |
|----|-----------------|--------------|---|---|---|------------|-----------------------------|
| 1  |                 |              |   |   |   |            |                             |
| 2  |                 |              |   |   |   |            |                             |
| 3  | Voriconazole    | Vfend        | 1 | 1 |   | 2004-08-20 | 1 antimycotics for systemic |
| 4  |                 |              |   |   |   |            | use                         |
| 5  | Frovatriptan    | Frova        | 1 | 1 |   | 2004-09-03 | 1 analgesics                |
| 6  | Adalimumab      | Humira       | 1 | 1 |   | 2004-09-24 | 1 immunosuppressants        |
| 7  | Alefacept       | Amevive      | 1 | 1 |   | 2004-10-06 | 1 immunosuppressants        |
| 8  | Omalizumab      | Xolair       | 1 | 1 |   | 2004-11-18 | 1 drugs for obstructive     |
| 9  |                 |              |   |   |   |            | airway diseases             |
| 10 | Memantine       | Ebixa        | 1 | 1 | 1 | 2004-12-08 | 1 psychoanaleptics          |
| 11 | Fosamprenavir   | Telzir       | 1 | 1 |   | 2004-12-10 | 1 antivirals for systemic   |
| 12 |                 |              |   |   |   |            | use                         |
| 13 | Drospirenone/et | Yasmin 21/28 | 1 | 1 |   | 2004-12-10 | 1 sex hormones and          |
| 14 | hinyI estradiol |              |   |   |   |            | modulators of the genital   |
| 15 |                 |              |   |   |   |            | svstem                      |
| 16 | Atomoxetine     | Strattera    | 1 | 1 |   | 2004-12-24 | 1 psychoanaleptics          |
| 17 | Escitalopram    | Cipralax     | 1 | 1 |   | 2004-12-24 | 1 psychoanaleptics          |
| 18 | Bortezomib      | Velcade      | 1 | 1 | 1 | 2005-01-27 | 1 antineoplastic agents     |
| 19 | Paricalcitol    | Zemplar      | 1 | 1 |   | 2005-03-31 | 1 calcium homeostasis       |
| 20 | Pantoprazole    | Pantaloc M   | 1 | 1 |   | 2005-04-22 | 1 drugs for acid related    |
| 21 |                 |              |   |   |   |            | disorders                   |
| 22 | Pegaptanib      | Macugen      | 1 | 1 |   | 2005-05-02 | 1 ophthalmologicals         |
| 23 | Ibritumomab     | Zevalin      | 1 | 1 |   | 2005-05-10 | 1 therapeutic               |
| 24 |                 |              |   |   |   |            | radiopharmaceuticals        |
| 25 | Pregabalin      | Lyrica       | 1 | 1 |   | 2005-06-03 | 1 antiepileptics            |
| 26 | Lutropin Alfa   | Luveris      | 1 | 1 |   | 2005-06-24 | 1 sex hormones and          |
| 27 |                 |              |   |   |   |            | modulators of the genital   |
| 28 |                 |              |   |   |   |            | svstem                      |
| 29 | Erlotinib       | Tarceva      | 1 | 1 |   | 2005-07-07 | 1 antineoplastic agents     |
| 30 | Tramadol        | Tramacet     | 1 | 1 |   | 2005-07-20 | 1 analgesics                |
| 31 | Sodium oxybate  | Xyrem        | 1 | 1 |   | 2005-08-05 | 1 other nervous system      |
| 32 | Perindopril     | Coversyl     | 1 | 1 |   | 2005-08-23 | 1 agents acting on the      |
| 33 |                 |              |   |   |   |            | renin-angiotensin system    |
| 34 | Bevacizumab     | Avastin      | 1 | 1 |   | 2005-09-09 | 1 antineoplastic agents     |
| 35 |                 |              |   |   |   |            |                             |
| 36 |                 |              |   |   |   |            |                             |
| 37 |                 |              |   |   |   |            |                             |
| 38 |                 |              |   |   |   |            |                             |
| 39 |                 |              |   |   |   |            |                             |
| 40 |                 |              |   |   |   |            |                             |
| 41 |                 |              |   |   |   |            |                             |
| 42 |                 |              |   |   |   |            |                             |
| 43 |                 |              |   |   |   |            |                             |
| 44 |                 |              |   |   |   |            |                             |
| 45 |                 |              |   |   |   |            |                             |
| 46 |                 |              |   |   |   |            |                             |
| 47 |                 |              |   |   |   |            |                             |

|    |                   |            |   |   |   |            |   |                          |
|----|-------------------|------------|---|---|---|------------|---|--------------------------|
| 1  |                   |            |   |   |   |            |   |                          |
| 2  |                   |            |   |   |   |            |   |                          |
| 3  | Cetuximab         | Erbix      | 1 |   | 1 | 2005-09-09 |   | 1 antineoplastic agents  |
| 4  | Insulin detemir   | Levemir    | 1 | 1 |   | 2005-09-29 |   | 1 drugs used in diabetes |
| 5  | Pegvisomant       | Somavert   | 1 |   | 1 | 2005-10-17 |   | 1 pituitary and          |
| 6  |                   |            |   |   |   |            |   | hypothalamic hormones    |
| 7  |                   |            |   |   |   |            |   |                          |
| 8  | Efalizumab        | Raptiva    | 1 | 1 |   | 2005-10-24 |   | 1 immunosuppressants     |
| 9  | Darifenacin       | Enablex    | 1 | 1 |   | 2005-11-14 | 1 | urologicals              |
| 10 | Emtricitabine     | Emtriva    | 1 | 1 |   | 2005-11-21 | 1 | antivirals for systemic  |
| 11 |                   |            |   |   |   |            |   | use                      |
| 12 | Tipranavir        | Aptivus    | 1 |   | 1 | 2005-11-21 | 1 | antivirals for systemic  |
| 13 |                   |            |   |   |   |            |   | use                      |
| 14 | Alemtuzumab       | Mabcampath | 1 | 1 |   | 2005-11-30 |   | 1 immunosuppressants     |
| 15 | Palifermin        | Kepivance  | 1 |   | 1 | 2005-12-09 |   | 1 all other therapeutic  |
| 16 |                   |            |   |   |   |            |   | products                 |
| 17 | Trospium          | Trosec     | 1 | 1 |   | 2006-01-10 | 1 | urologicals              |
| 18 | Solifenacin       | Vesicare   | 1 | 1 |   | 2006-02-20 | 1 | urologicals              |
| 19 | Histrelin         | Vantas     | 1 | 1 |   | 2006-03-10 | 1 | endocrine therapy        |
| 20 | Insulin glulisine | Apidra     | 1 | 1 |   | 2006-04-12 |   | 1 drugs used in diabetes |
| 21 | Sunitinib         | Sutent     | 1 |   | 1 | 2006-05-26 | 1 | antineoplastic agents    |
| 22 | Entecavir         | Baraclude  | 1 |   | 1 | 2006-06-16 | 1 | pituitary and            |
| 23 |                   |            |   |   |   |            |   | hypothalamic hormones    |
| 24 |                   |            |   |   |   |            |   | and analogues            |
| 25 | Abatacept         | Orencia    | 1 |   | 1 | 2006-06-29 |   | 1 immunosuppressants     |
| 26 | Recombinant       | Gardasil   | 1 |   | 1 | 2006-07-10 |   | 1 vaccines               |
| 27 | human             |            |   |   |   |            |   |                          |
| 28 | papillomavirus    |            |   |   |   |            |   |                          |
| 29 | Lanreotide        | Somatuline | 1 | 1 |   | 2006-07-17 | 1 | antivirals for systemic  |
| 30 |                   | autogel    |   |   |   |            |   | use                      |
| 31 | Sorafenib         | Nexavar    | 1 | 1 |   | 2006-07-28 | 1 | antineoplastic agents    |
| 32 | Darunavir         | Prezista   | 1 | 1 | 1 | 2006-07-28 | 1 | antivirals for systemic  |
| 33 |                   |            |   |   |   |            |   | use                      |
| 34 | Rotaviruses       | Rotateq    | 1 | 1 |   | 2006-08-01 |   | 1 vaccines               |
| 35 |                   |            |   |   |   |            |   |                          |
| 36 |                   |            |   |   |   |            |   |                          |
| 37 |                   |            |   |   |   |            |   |                          |
| 38 |                   |            |   |   |   |            |   |                          |
| 39 |                   |            |   |   |   |            |   |                          |
| 40 |                   |            |   |   |   |            |   |                          |
| 41 |                   |            |   |   |   |            |   |                          |
| 42 |                   |            |   |   |   |            |   |                          |
| 43 |                   |            |   |   |   |            |   |                          |
| 44 |                   |            |   |   |   |            |   |                          |
| 45 |                   |            |   |   |   |            |   |                          |
| 46 |                   |            |   |   |   |            |   |                          |
| 47 |                   |            |   |   |   |            |   |                          |

|    |               |           |   |   |   |            |            |                           |
|----|---------------|-----------|---|---|---|------------|------------|---------------------------|
| 1  |               |           |   |   |   |            |            |                           |
| 2  |               |           |   |   |   |            |            |                           |
| 3  | Alglucosidase | Myozyme   | 1 |   | 1 | 2006-08-14 | 1          | other alimentary tract    |
| 4  | Alfa          |           |   |   |   |            |            | and metabolism products   |
| 5  |               |           |   |   |   |            |            |                           |
| 6  | Rasagiline    | Azilect   |   | 1 | 1 | 2006-08-17 | 1          | anti-parkinson drugs      |
| 7  | Ciclesonide   | Alvesco   |   | 1 | 1 | 2006-09-11 | 1          | drugs for obstructive     |
| 8  |               |           |   |   |   |            |            | airway diseases           |
| 9  | Tigecycline   | Tygacil   |   | 1 | 1 | 2006-09-14 | 1          | antibacterials for        |
| 10 |               |           |   |   |   |            |            | systemic use              |
| 11 | Natalizumab   | Tysabri   |   | 1 | 1 | 2006-09-28 |            | immunosuppressants        |
| 12 | Lanthanum     | Fosrenol  |   | 1 | 1 | 2006-10-17 | 1          | all other therapeutic     |
| 13 |               |           |   |   |   |            |            | products                  |
| 14 | Deferasirox   | Exjade    |   | 1 | 1 | 1          | 2006-10-18 | 1                         |
| 15 |               |           |   |   |   |            |            | all other therapeutic     |
| 16 |               |           |   |   |   |            |            | products                  |
| 17 | Gadofosveset  | Vasovist  |   | 1 | 1 |            | 2006-10-31 | 1                         |
| 18 | Telbivudine   | Sebivo    |   | 1 | 1 |            | 2006-11-28 | 1                         |
| 19 |               |           |   |   |   |            |            | antivirals for systemic   |
| 20 |               |           |   |   |   |            |            | use                       |
| 21 | Varenicline   | Champix   |   | 1 | 1 |            | 2007-01-24 | 1                         |
| 22 |               |           |   |   |   |            |            | other nervous system      |
| 23 | Acamprosate   | Campral   |   | 1 | 1 |            | 2007-03-16 | 1                         |
| 24 |               |           |   |   |   |            |            | other nervous system      |
| 25 | Dasatinib     | Sprycell  | 1 |   | 1 | 1          | 2007-03-26 | 1                         |
| 26 | Posaconazole  | Spriafil  | 1 |   |   | 1          | 2007-03-26 | 1                         |
| 27 |               | (Posanol) |   |   |   |            |            | antimycotics for systemic |
| 28 | Micafungin    | Mycamine  |   | 1 | 1 |            | 2007-05-22 | 1                         |
| 29 |               |           |   |   |   |            |            | use                       |
| 30 | Sitaxentan    | Thelin    |   | 1 | 1 |            | 2007-05-30 | 1                         |
| 31 |               |           |   |   |   |            |            | antihypertensives         |
| 32 | Idursulfase   | Elaprase  |   | 1 |   | 1          | 2007-06-13 | 1                         |
| 33 |               |           |   |   |   |            |            | other alimentary tract    |
| 34 |               |           |   |   |   |            |            | and metabolism products   |
| 35 | Oxaliplatin   | Eloxatin  |   | 1 |   | 1          | 2007-06-15 | 1                         |
| 36 |               |           |   |   |   |            |            | antineoplastic agents     |
| 37 | Ranibizumab   | Lucentis  | 1 |   |   | 1          | 2007-06-26 | 1                         |
| 38 |               |           |   |   |   |            |            | ophthalmologicals         |
| 39 | Fluticasone   | Avamys    |   | 1 | 1 |            | 2007-08-14 | 1                         |
| 40 |               |           |   |   |   |            |            | drugs for obstructive     |
| 41 |               |           |   |   |   |            |            | airway diseases           |
| 42 | Aprepitant    | Emend     |   | 1 | 1 |            | 2007-08-24 | 1                         |
| 43 |               |           |   |   |   |            |            | antiemetics and           |
| 44 |               |           |   |   |   |            |            | antinauseants             |

|    |                 |              |   |   |            |   |   |                           |
|----|-----------------|--------------|---|---|------------|---|---|---------------------------|
| 1  |                 |              |   |   |            |   |   |                           |
| 2  |                 |              |   |   |            |   |   |                           |
| 3  | Maraviroc       | Celsentri    | 1 | 1 | 2007-09-21 | 1 |   | antivirals for systemic   |
| 4  |                 |              |   |   |            |   |   | use                       |
| 5  | Daptomycin      | Cubicin      | 1 | 1 | 2007-09-24 | 1 |   | antibacterials for        |
| 6  |                 |              |   |   |            |   |   | systemic use              |
| 7  | Paliperidone    | Invega       | 1 | 1 | 2007-09-26 | 1 |   | psycholeptics             |
| 8  | Duloxetine      | Cymbalta     | 1 | 1 | 2007-11-01 | 1 |   | psychoanaleptics          |
| 9  | Nesiritide      | Natrecor     | 1 | 1 | 2007-11-08 |   | 1 | cardiac therapy           |
| 10 | Aliskiren       | Rasilez      | 1 | 1 | 2007-11-14 | 1 |   | agents acting on the      |
| 11 |                 |              |   |   |            |   |   | renin-angiotensin system  |
| 12 |                 |              |   |   |            |   |   |                           |
| 13 |                 |              |   |   |            |   |   |                           |
| 14 | Anidulafungin   | Eraxis       | 1 | 1 | 2007-11-14 | 1 |   | antimycotics for systemic |
| 15 |                 |              |   |   |            |   |   | use                       |
| 16 | Raltegravir     | Isentress    | 1 | 1 | 2007-11-27 | 1 |   | antivirals for systemic   |
| 17 |                 |              |   |   |            |   |   | use                       |
| 18 | Rivastigmine    | Exelon patch | 1 | 1 | 2007-11-29 | 1 |   | psychoanaleptics          |
| 19 | Sitagliptin     | Januvia      | 1 | 1 | 2007-12-14 | 1 |   | drugs used in diabetes    |
| 20 | Temsirolimus    | Torisel      | 1 | 1 | 2007-12-21 | 1 |   | antineoplastic agents     |
| 21 | Lenalidomide    | Revlimid     | 1 | 1 | 2008-01-17 | 1 |   | immunosuppressants        |
| 22 | Ambrisentan     | Volibris     | 1 | 1 | 2008-03-20 | 1 |   | antihypertensives         |
| 23 | Etravirine      | Intelence    | 1 | 1 | 2008-03-27 | 1 |   | antivirals for systemic   |
| 24 |                 |              |   |   |            |   |   | use                       |
| 25 | Methylnaltrexon | Relistor     | 1 | 1 | 2008-03-28 | 1 |   | drugs for constipation    |
| 26 |                 |              |   |   |            |   |   |                           |
| 27 | e               |              |   |   |            |   |   |                           |
| 28 | Panitumumab     | Vectibix     | 1 | 1 | 2008-04-03 |   | 1 | antineoplastic agents     |
| 29 | Nepafenac       | Nevanac      | 1 | 1 | 2008-04-17 | 1 |   | ophthalmologicals         |
| 30 | Dabigatran      | Pradaxa      | 1 | 1 | 2008-06-10 | 1 |   | antithrombotic agents     |
| 31 | Ceftobiprole    | Zeftera      | 1 | 1 | 2008-06-26 | 1 |   | antibacterials for        |
| 32 |                 |              |   |   |            |   |   | systemic use              |
| 33 | Idebenone       | Catena       | 1 | 1 | 2008-07-23 | 1 |   | psychoanaleptics          |
| 34 | Nilotinib       | Tasigna      | 1 | 1 | 2008-09-09 | 1 |   | antineoplastic agents     |
| 35 | Rivaroxaban     | Xarelto      | 1 | 1 | 2008-09-15 | 1 |   | antithrombotic agents     |
| 36 |                 |              |   |   |            |   |   |                           |
| 37 |                 |              |   |   |            |   |   |                           |
| 38 |                 |              |   |   |            |   |   |                           |
| 39 |                 |              |   |   |            |   |   |                           |
| 40 |                 |              |   |   |            |   |   |                           |
| 41 |                 |              |   |   |            |   |   |                           |
| 42 |                 |              |   |   |            |   |   |                           |
| 43 |                 |              |   |   |            |   |   |                           |
| 44 |                 |              |   |   |            |   |   |                           |
| 45 |                 |              |   |   |            |   |   |                           |
| 46 |                 |              |   |   |            |   |   |                           |
| 47 |                 |              |   |   |            |   |   |                           |



|    |                 |           |   |   |   |            |   |                          |
|----|-----------------|-----------|---|---|---|------------|---|--------------------------|
| 1  |                 |           |   |   |   |            |   |                          |
| 2  |                 |           |   |   |   |            |   |                          |
| 3  | Olmesartan      | Olmotec   | 1 | 1 |   | 2008-10-28 | 1 | agents acting on the     |
| 4  |                 |           |   |   |   |            |   | renin-angiotensin system |
| 5  |                 |           |   |   |   |            |   |                          |
| 6  | Capsular        | Synflorix | 1 | 1 |   | 2008-12-11 |   | 1 vaccines               |
| 7  | polysaccharide  |           |   |   |   |            |   |                          |
| 8  | Ustekinumab     | Stelara   | 1 | 1 |   | 2008-12-12 |   | 1 immunosuppressants     |
| 9  | Loteprednol     | Alrex     | 1 | 1 |   | 2008-12-23 | 1 | ophthalmologicals        |
| 10 | Eculizumab      | Soliris   | 1 |   | 1 | 2009-01-28 |   | 1 immunosuppressants     |
| 11 | Desvenlafaxine  | Pristiq   | 1 | 1 |   | 2009-02-04 | 1 | psychoanaleptics         |
| 12 | Lisdexamfetami  | Vyvanse   | 1 | 1 |   | 2009-02-19 | 1 | psychoanaleptics         |
| 13 | ne              |           |   |   |   |            |   |                          |
| 14 | Romiplostim     | Nplate    | 1 |   | 1 | 2009-02-19 |   | 1 antihemorrhagics       |
| 15 | Methyl          | Metvix    | 1 | 1 |   | 2009-02-26 | 1 | antineoplastic agents    |
| 16 | aminolevulinate |           |   |   |   |            |   |                          |
| 17 | Eplerenone      | Inspra    | 1 | 1 |   | 2009-02-26 | 1 | diuretics                |
| 18 | Fosaprepitant   | Emend IV  | 1 | 1 |   | 2009-04-01 | 1 | antivirals for systemic  |
| 19 |                 |           |   |   |   |            |   | use                      |
| 20 | Golimumab       | Simponi   | 1 | 1 |   | 2009-04-07 |   | 1 immunosuppressants     |
| 21 | Lapatinib       | Tykerb    | 1 | 1 |   | 2009-05-15 | 1 | antineoplastic agents    |
| 22 | Vorinostat      | Zolinza   | 1 | 1 |   | 2009-06-11 | 1 | antineoplastic agents    |
| 23 | Aripiprazole    | Abilify   | 1 | 1 |   | 2009-07-09 | 1 | psycholeptics            |
| 24 | Clofarabine     | Clolar    | 1 | 1 |   | 2009-07-16 | 1 | antineoplastic agents    |
| 25 | Dronedarone     | Multaq    | 1 |   | 1 | 2009-08-11 | 1 | cardiac therapy          |
| 26 | Certolizumab    | Cimzia    | 1 | 1 |   | 2009-08-12 |   | 1 immunosuppressants     |
| 27 | Doripenem       | Doribax   | 1 | 1 |   | 2009-09-02 | 1 | antibacterials for       |
| 28 |                 |           |   |   |   |            |   | systemic use             |
| 29 | Aztreonam       | Cayston   | 1 |   | 1 | 2009-09-11 | 1 | antibacterials for       |
| 30 |                 |           |   |   |   |            |   | systemic use             |
| 31 | Saxagliptin     | Onglyza   | 1 | 1 |   | 2009-09-14 | 1 | drugs used in diabetes   |
| 32 | Besifloxacin    | Besivance | 1 | 1 |   | 2009-10-23 | 1 | ophthalmologicals        |
| 33 | Azacitidine     | Vidaza    | 1 |   | 1 | 2009-10-23 | 1 | antineoplastic agents    |
| 34 |                 |           |   |   |   |            |   |                          |
| 35 |                 |           |   |   |   |            |   |                          |
| 36 |                 |           |   |   |   |            |   |                          |
| 37 |                 |           |   |   |   |            |   |                          |
| 38 |                 |           |   |   |   |            |   |                          |
| 39 |                 |           |   |   |   |            |   |                          |
| 40 |                 |           |   |   |   |            |   |                          |
| 41 |                 |           |   |   |   |            |   |                          |
| 42 |                 |           |   |   |   |            |   |                          |
| 43 |                 |           |   |   |   |            |   |                          |
| 44 |                 |           |   |   |   |            |   |                          |
| 45 |                 |           |   |   |   |            |   |                          |
| 46 |                 |           |   |   |   |            |   |                          |
| 47 |                 |           |   |   |   |            |   |                          |

|    |                                           |                               |   |   |            |   |   |                                                |
|----|-------------------------------------------|-------------------------------|---|---|------------|---|---|------------------------------------------------|
| 1  |                                           |                               |   |   |            |   |   |                                                |
| 2  |                                           |                               |   |   |            |   |   |                                                |
| 3  | Japanese                                  | Ixiaro                        | 1 | 1 | 2009-10-29 |   | 1 | vaccines                                       |
| 4  | encephalitis                              |                               |   |   |            |   |   |                                                |
| 5  | vaccine                                   |                               |   |   |            |   |   |                                                |
| 6  | Alitretinoin                              | Toctino                       | 1 | 1 | 2009-11-13 |   | 1 | antineoplastic agents                          |
| 7  | Degarelix                                 | Firmagon                      | 1 | 1 | 2009-11-16 |   | 1 | endocrine therapy                              |
| 8  | Dexmedetomidine                           | Precedex                      | 1 | 1 | 2009-12-09 |   | 1 | psycholeptics                                  |
| 9  | Everolimus                                | Afinitor                      | 1 | 1 | 2009-12-14 | 1 | 1 | antineoplastic agents                          |
| 10 | Thrombin alfa                             | Recothrom                     | 1 | 1 | 2009-12-15 |   | 1 | antihemorrhagics                               |
| 11 | Pneumococcal conjugate                    | Prevnar                       | 1 |   | 2009-12-21 | 1 | 1 | vaccines                                       |
| 12 | Gadoxetate                                | Primovist                     | 1 | 1 | 2010-01-14 |   | 1 | contrast media                                 |
| 13 | Recombinant human papillomavirus          | Cervarix                      | 1 | 1 | 2010-02-03 |   | 1 | vaccines                                       |
| 14 | Canakinumab                               | Ilaris                        | 1 |   | 2010-02-26 |   | 1 | immunosuppressants                             |
| 15 | Prasugrel                                 | Effient                       | 1 | 1 | 2010-04-16 |   | 1 | antithrombotic agents                          |
| 16 | Tocilizumab                               | Actemra                       | 1 | 1 | 2010-04-30 |   | 1 | immunosuppressants                             |
| 17 | Sapropterin                               | Kuvan                         | 1 |   | 2010-04-30 | 1 | 1 | other alimentary tract and metabolism products |
| 18 | Trabectedin                               | Yondelis                      | 1 | 1 | 2010-05-13 |   | 1 | antineoplastic agents                          |
| 19 | Liraglutide                               | Victoza - 1.2 mg pen-injector | 1 | 1 | 2010-05-21 |   | 1 | drugs used in diabetes                         |
| 20 | Meningococcal oligosaccharides conjugated | Menveo                        | 1 | 1 | 2010-05-21 |   | 1 | vaccines                                       |
| 21 | Pazopanib                                 | Votrient                      | 1 | 1 | 2010-05-27 |   | 1 | antineoplastic agents                          |
| 22 | Paliperidone                              | Invega sustenna               | 1 | 1 | 2010-06-30 |   | 1 | psycholeptics                                  |
| 23 | Sevelamer                                 | Renvela                       | 1 | 1 | 2010-07-07 |   | 1 | all other therapeutic products                 |
| 24 | Dexlansoprazole                           | Dexilant                      | 1 | 1 | 2010-07-22 |   | 1 | drugs for acid related disorders               |
| 25 |                                           |                               |   |   |            |   |   |                                                |
| 26 |                                           |                               |   |   |            |   |   |                                                |
| 27 |                                           |                               |   |   |            |   |   |                                                |
| 28 |                                           |                               |   |   |            |   |   |                                                |
| 29 |                                           |                               |   |   |            |   |   |                                                |
| 30 |                                           |                               |   |   |            |   |   |                                                |
| 31 |                                           |                               |   |   |            |   |   |                                                |
| 32 |                                           |                               |   |   |            |   |   |                                                |
| 33 |                                           |                               |   |   |            |   |   |                                                |
| 34 |                                           |                               |   |   |            |   |   |                                                |
| 35 |                                           |                               |   |   |            |   |   |                                                |
| 36 |                                           |                               |   |   |            |   |   |                                                |
| 37 |                                           |                               |   |   |            |   |   |                                                |
| 38 |                                           |                               |   |   |            |   |   |                                                |
| 39 |                                           |                               |   |   |            |   |   |                                                |
| 40 |                                           |                               |   |   |            |   |   |                                                |
| 41 |                                           |                               |   |   |            |   |   |                                                |
| 42 |                                           |                               |   |   |            |   |   |                                                |
| 43 |                                           |                               |   |   |            |   |   |                                                |
| 44 |                                           |                               |   |   |            |   |   |                                                |
| 45 |                                           |                               |   |   |            |   |   |                                                |
| 46 |                                           |                               |   |   |            |   |   |                                                |
| 47 |                                           |                               |   |   |            |   |   |                                                |

|    |                    |                  |   |   |            |  |   |                         |
|----|--------------------|------------------|---|---|------------|--|---|-------------------------|
| 1  |                    |                  |   |   |            |  |   |                         |
| 2  |                    |                  |   |   |            |  |   |                         |
| 3  | Denosumab          | Prolia           | 1 | 1 | 2010-08-06 |  | 1 | drugs for treatment of  |
| 4  |                    |                  |   |   |            |  |   | bone disease            |
| 5  | Febuxostat         | Uloric           | 1 | 1 | 2010-09-22 |  | 1 | antigout preparations   |
| 6  | Lacosamide         | Vimpat           | 1 | 1 | 2010-09-30 |  | 1 | antiepileptics          |
| 7  | Velaglucerase alf. | VPRIV            | 1 | 1 | 2010-10-01 |  | 1 | other alimentary tract  |
| 8  |                    |                  |   |   |            |  |   | and metabolism products |
| 9  |                    |                  |   |   |            |  |   |                         |
| 10 |                    |                  |   |   |            |  |   |                         |
| 11 | Roflumilast        | Daxas            | 1 | 1 | 2010-11-23 |  | 1 | drugs for obstructive   |
| 12 |                    |                  |   |   |            |  |   | airway diseases         |
| 13 | Tapentadol         | Nucynta CR       | 1 | 1 | 2010-12-02 |  | 1 | analgesics              |
| 14 | Sildenafil         | Rapaflo          | 1 | 1 | 2011-01-11 |  | 1 | urologicals             |
| 15 | Eltrombopag        | Revolade         | 1 | 1 | 2011-01-12 |  | 1 | antihemorrhagics        |
| 16 | Exenatide          | Byetta           | 1 | 1 | 2011-01-13 |  | 1 | drugs used in diabetes  |
| 17 | Fingolimod         | Gilenya          | 1 | 1 | 2011-03-09 |  | 1 | immunosuppressants      |
| 18 | Ticagrelor         | Brilinta         | 1 | 1 | 2011-05-30 |  | 1 | antithrombotic agents   |
| 19 | Cabazitaxel        | Jevtana          | 1 | 1 | 2011-06-16 |  | 1 | antineoplastic agents   |
| 20 | Rufinamide         | Banzel           | 1 | 1 | 2011-06-22 |  | 1 | antiepileptics          |
| 21 | Belimumab          | Benlysta         | 1 | 1 | 2011-07-06 |  | 1 | immunosuppressants      |
| 22 | Rilpivirine        | Edurant          | 1 | 1 | 2011-07-21 |  | 1 | antivirals for systemic |
| 23 |                    |                  |   |   |            |  |   | use                     |
| 24 | Tolvaptan          | Samsca           | 1 | 1 | 2011-07-25 |  | 1 | diuretics               |
| 25 | Abiraterone        | Zytiga           | 1 | 1 | 2011-07-27 |  | 1 | endocrine therapy       |
| 26 | Linagliptin        | Trajenta         | 1 | 1 | 2011-07-28 |  | 1 | drugs used in diabetes  |
| 27 | Boceprevir         | Victrelis        | 1 | 1 | 2011-07-29 |  | 1 | antivirals for systemic |
| 28 |                    |                  |   |   |            |  |   | use                     |
| 29 | Boceprevir,        | Victrelis Triple | 1 | 1 | 2011-08-10 |  | 1 | immunostimulants        |
| 30 | peginterferon      |                  |   |   |            |  |   |                         |
| 31 | alfa-2b, ribavirin |                  |   |   |            |  |   |                         |
| 32 | Telaprevir         | Incivek          | 1 | 1 | 2011-08-16 |  | 1 | antivirals for systemic |
| 33 |                    |                  |   |   |            |  |   | use                     |
| 34 | Colesevelam        | Lodalis          | 1 | 1 | 2011-09-22 |  | 1 | lipid modifying agents  |
| 35 | Senapine           | Saphris          | 1 | 1 | 2011-10-07 |  | 1 | psycholeptics           |
| 36 |                    |                  |   |   |            |  |   |                         |
| 37 |                    |                  |   |   |            |  |   |                         |
| 38 |                    |                  |   |   |            |  |   |                         |
| 39 |                    |                  |   |   |            |  |   |                         |
| 40 |                    |                  |   |   |            |  |   |                         |
| 41 |                    |                  |   |   |            |  |   |                         |
| 42 |                    |                  |   |   |            |  |   |                         |
| 43 |                    |                  |   |   |            |  |   |                         |
| 44 |                    |                  |   |   |            |  |   |                         |
| 45 |                    |                  |   |   |            |  |   |                         |
| 46 |                    |                  |   |   |            |  |   |                         |
| 47 |                    |                  |   |   |            |  |   |                         |

|    |               |            |   |   |              |   |                             |
|----|---------------|------------|---|---|--------------|---|-----------------------------|
| 1  |               |            |   |   |              |   |                             |
| 2  |               |            |   |   |              |   |                             |
| 3  | Dienogest     | Visanne    | 1 | 1 | 2011-10-12   | 1 | sex hormones and            |
| 4  |               |            |   |   |              |   | modulators of the genital   |
| 5  |               |            |   |   |              |   | svstem                      |
| 6  | Indacaterol   | Onbrez     | 1 | 1 | 2011-12-06   | 1 | drugs for obstructive       |
| 7  |               | breezhaler |   |   |              |   | airway diseases             |
| 8  | Prucalopride  | Resotran   | 1 | 1 | 2011-12-07   | 1 | drugs for constipation      |
| 9  | Plerixafor    | Mozobil    | 1 | 1 | 2011-12-08   | 1 | immunostimulants            |
| 10 | Eribulin      | Halaven    | 1 | 1 | 2011-12-14   | 1 | antineoplastic agents       |
| 11 | Apixaban      | Eliquis    | 1 | 1 | 2011-12-16   | 1 | antithrombotic agents       |
| 12 | Vandetanib    | Caprelsa   | 1 | 1 | 2012-01-12   | 1 | antineoplastic agents       |
| 13 | Ipilimumab    | Yervoy     | 1 | 1 | 2012-02-01   |   | 1 antineoplastic agents     |
| 14 | Fesoterodine  | Toviaz     | 1 | 1 | 2012-02-09   | 1 | urologicals                 |
| 15 | Fampridine    | Fampyra    | 1 | 1 | 2012-02-10   | 1 | other nervous system        |
| 16 | Vemurafenib   | Zelboraf   | 1 | 1 | 2012-02-15   |   | antineoplastic agents       |
| 17 | Azilsartan    | Edarbi     | 1 | 1 | 2012-03-08   | 1 | agents acting on the        |
| 18 |               |            |   |   |              |   | renin-angiotensin system    |
| 19 | Ofatumumab    | Arzerra    | 1 | 1 | 2012-03-09   |   | 1 antineoplastic agents     |
| 20 | Palonosetron  | Aloxi      | 1 | 1 | 2012-03-14   | 1 | antiemetics and             |
| 21 |               |            |   |   |              |   | antinauseants               |
| 22 | Crizotinib    | Xalkori    | 1 | 1 | 1 2012-04-25 | 1 | antineoplastic agents       |
| 23 | Fidaxomicin   | Dificid    | 1 | 1 | 2012-06-07   | 1 | antidiarrheals, intestinal  |
| 24 |               |            |   |   |              |   | antiinflammatory/antiinf    |
| 25 |               |            |   |   |              |   | ective agents               |
| 26 | Lurasidone    | Latuda     | 1 | 1 | 2012-06-13   | 1 | psycholeptics               |
| 27 | Ruxolitinib   | Jakavi     | 1 | 1 | 2012-06-19   | 1 | antineoplastic agents       |
| 28 | Collagenase   | Xiaflex    | 1 | 1 | 2012-07-05   |   | 1 other drugs for disorders |
| 29 | clostridium   |            |   |   |              |   | of the musculo-skeletal     |
| 30 | histolviticum |            |   |   |              |   | svstem                      |
| 31 | Axitinib      | Inlyta     | 1 | 1 | 2012-07-12   | 1 | antineoplastic agents       |
| 32 | Catridecacog  | Tretten    | 1 | 1 | 2012-07-19   |   | 1 antihemorrhagics          |
| 33 | Bendamustine  | Treanda    | 1 | 1 | 2012-08-24   | 1 | antineoplastic agents       |
| 34 | Pirfenidone   | Esbriet    | 1 | 1 | 2012-10-01   |   | immunosuppressants          |
| 35 |               |            |   |   |              |   |                             |
| 36 |               |            |   |   |              |   |                             |
| 37 |               |            |   |   |              |   |                             |
| 38 |               |            |   |   |              |   |                             |
| 39 |               |            |   |   |              |   |                             |
| 40 |               |            |   |   |              |   |                             |
| 41 |               |            |   |   |              |   |                             |
| 42 |               |            |   |   |              |   |                             |
| 43 |               |            |   |   |              |   |                             |
| 44 |               |            |   |   |              |   |                             |
| 45 |               |            |   |   |              |   |                             |
| 46 |               |            |   |   |              |   |                             |
| 47 |               |            |   |   |              |   |                             |

|    |                  |           |   |   |   |            |   |                           |
|----|------------------|-----------|---|---|---|------------|---|---------------------------|
| 1  |                  |           |   |   |   |            |   |                           |
| 2  |                  |           |   |   |   |            |   |                           |
| 3  | Elvitegravir,    | Stribild  | 1 | 1 |   | 2012-11-26 | 1 | antivirals for systemic   |
| 4  | emtricitabine,   |           |   |   |   |            |   | use                       |
| 5  | tenofovir,       |           |   |   |   |            |   |                           |
| 6  | cobicistat       |           |   |   |   |            |   |                           |
| 7  |                  |           |   |   |   |            |   |                           |
| 8  | Ivacaftor        | Kalydeco  | 1 |   |   | 2012-11-26 | 1 | other respiratory system  |
| 9  |                  |           |   |   |   |            |   | products                  |
| 10 | Stiripentol      | Diacomit  | 1 | 1 |   | 2012-12-21 | 1 | antiepileptics            |
| 11 | Nebivolol        | Bystolic  | 1 | 1 |   | 2012-12-21 | 1 | beta blocking agents      |
| 12 | Ingenol          | Picato    | 1 | 1 |   | 2013-01-30 | 1 | antibiotics and           |
| 13 |                  |           |   |   |   |            |   | chemotherapeutics for     |
| 14 |                  |           |   |   |   |            |   | dermatological use        |
| 15 |                  |           |   |   |   |            |   | antineoplastic agents     |
| 16 | Brentuximab      | Adcetris  | 1 | 1 | 1 | 2013-02-01 | 1 |                           |
| 17 | Meningococcal    | Nimenrix  | 1 | 1 |   | 2013-03-05 | 1 | vaccines                  |
| 18 | polysaccharide   |           |   |   |   |            |   |                           |
| 19 | groups A,C,W-    |           |   |   |   |            |   |                           |
| 20 | 135 & Y          |           |   |   |   |            |   |                           |
| 21 | conjugate        |           |   |   |   |            |   |                           |
| 22 | vaccine, Tetanus |           |   |   |   |            |   |                           |
| 23 | toxoid           |           |   |   |   |            |   |                           |
| 24 | Mirabegron       | Myrbetriq | 1 | 1 |   | 2013-03-06 | 1 | urologicals               |
| 25 | Regorafenib      | Stivarga  | 1 |   | 1 | 2013-03-11 | 1 | antineoplastic agents     |
| 26 | Rotigotine       | Neupro    | 1 | 1 |   | 2013-03-21 | 1 | anti-parkinson drugs      |
| 27 | Dimethyl         | Tecfidera | 1 | 1 |   | 2013-04-03 | 1 | other nervous system      |
| 28 | Perampanel       | Fycompa   | 1 | 1 |   | 2013-04-04 | 1 | antiepileptics            |
| 29 | Pertuzumab       | Perjeta   | 1 |   | 1 | 2013-04-12 | 1 | antineoplastic agents     |
| 30 | Enzalutamide     | Xtandi    | 1 |   | 1 | 2013-05-29 | 1 | endocrine therapy         |
| 31 | Ulipristal       | Fibristal | 1 | 1 |   | 2013-06-24 | 1 | sex hormones and          |
| 32 |                  |           |   |   |   |            |   | modulators of the genital |
| 33 |                  |           |   |   |   |            |   | system                    |
| 34 | Vismodegib       | Erivedge  | 1 | 1 |   | 2013-07-12 | 1 | antineoplastic agents     |
| 35 | Dabrafenib       | Tafinlar  | 1 | 1 |   | 2013-07-16 | 1 | antineoplastic agents     |
| 36 | Trametinib       | Mekinist  | 1 | 1 |   | 2013-07-18 | 1 | antineoplastic agents     |
| 37 |                  |           |   |   |   |            |   |                           |
| 38 |                  |           |   |   |   |            |   |                           |
| 39 |                  |           |   |   |   |            |   |                           |
| 40 |                  |           |   |   |   |            |   |                           |
| 41 |                  |           |   |   |   |            |   |                           |
| 42 |                  |           |   |   |   |            |   |                           |
| 43 |                  |           |   |   |   |            |   |                           |
| 44 |                  |           |   |   |   |            |   |                           |
| 45 |                  |           |   |   |   |            |   |                           |
| 46 |                  |           |   |   |   |            |   |                           |
| 47 |                  |           |   |   |   |            |   |                           |

|    |                                        |                 |   |   |            |   |                                                     |
|----|----------------------------------------|-----------------|---|---|------------|---|-----------------------------------------------------|
| 1  |                                        |                 |   |   |            |   |                                                     |
| 2  |                                        |                 |   |   |            |   |                                                     |
| 3  | Fluticasone and vilatnerol             | Breo ellipta    | 1 | 1 | 2013-07-23 | 1 | drugs for obstructive airway diseases               |
| 4  |                                        |                 |   |   |            |   |                                                     |
| 5  | Aclidinium                             | Tudorza genuair | 1 | 1 | 2013-07-29 | 1 | drugs for obstructive airway diseases               |
| 6  |                                        |                 |   |   |            |   |                                                     |
| 7  | Rifaximin                              | Zaxine          | 1 | 1 | 2013-08-13 | 1 | antidiarrheals, intestinal antiinflammatory/antiinf |
| 8  |                                        |                 |   |   |            |   |                                                     |
| 9  |                                        |                 |   |   |            |   |                                                     |
| 10 |                                        |                 |   |   |            |   |                                                     |
| 11 | Ocriplasmin                            | Jetrea          | 1 | 1 | 2013-08-13 | 1 | effective agents ophthalmologicals                  |
| 12 | Trastuzumab                            | Kadcyla         | 1 | 1 | 2013-09-11 | 1 | antineoplastic agents                               |
| 13 | emtansine                              |                 |   |   |            |   |                                                     |
| 14 | Galsulfase                             | Naglazyme       | 1 | 1 | 2013-09-16 | 1 | other alimentary tract and metabolism products      |
| 15 |                                        |                 |   |   |            |   |                                                     |
| 16 |                                        |                 |   |   |            |   |                                                     |
| 17 | Riociguat                              | Adempas         | 1 | 1 | 2013-09-19 | 1 | antihypertensives                                   |
| 18 | Pasireotide                            | Signifor        | 1 | 1 | 2013-09-23 | 1 | pituitary and hypothalamic hormones                 |
| 19 |                                        |                 |   |   |            |   |                                                     |
| 20 |                                        |                 |   |   |            |   |                                                     |
| 21 | Efinaconazole                          | Jublia          | 1 | 1 | 2013-10-02 | 1 | drugs used in diabetes                              |
| 22 | Romidepsin                             | Istodax         | 1 | 1 | 2013-10-16 | 1 | antineoplastic agents                               |
| 23 | Dolutegravir                           | Tivicay         | 1 | 1 | 2013-10-31 | 1 | antivirals for systemic use                         |
| 24 |                                        |                 |   |   |            |   |                                                     |
| 25 | Afatinib                               | Giotrif         | 1 | 1 | 2013-11-01 | 1 | antineoplastic agents                               |
| 26 | Macitentan                             | Opsumit         | 1 | 1 | 2013-11-06 | 1 | antihypertensives                                   |
| 27 | Aflibercept                            | Eylea           | 1 | 1 | 2013-11-08 | 1 | antineoplastic agents                               |
| 28 | Teriflunomide                          | Aubagio         | 1 | 1 | 2013-11-14 | 1 | immunosuppressants                                  |
| 29 | Simeprevir                             | Galexos         | 1 | 1 | 2013-11-18 | 1 | antivirals for systemic use                         |
| 30 |                                        |                 |   |   |            |   |                                                     |
| 31 | Alogliptin                             | Nesina          | 1 | 1 | 2013-11-27 | 1 | drugs used in diabetes                              |
| 32 |                                        |                 |   |   |            |   |                                                     |
| 33 | Linacotide                             | Constella       | 1 | 1 | 2013-12-02 | 1 | drugs for constipation                              |
| 34 |                                        |                 |   |   |            |   |                                                     |
| 35 | Multicomponent meningococcal B vaccine | Bexsero         | 1 | 1 | 2013-12-06 | 1 | vaccines                                            |
| 36 |                                        |                 |   |   |            |   |                                                     |
| 37 | Radium-223 dichloride                  | Xofigo          | 1 | 1 | 2013-12-12 | 1 | therapeutic radiopharmaceuticals                    |
| 38 |                                        |                 |   |   |            |   |                                                     |
| 39 |                                        |                 |   |   |            |   |                                                     |
| 40 |                                        |                 |   |   |            |   |                                                     |
| 41 |                                        |                 |   |   |            |   |                                                     |
| 42 |                                        |                 |   |   |            |   |                                                     |
| 43 |                                        |                 |   |   |            |   |                                                     |
| 44 |                                        |                 |   |   |            |   |                                                     |
| 45 |                                        |                 |   |   |            |   |                                                     |
| 46 |                                        |                 |   |   |            |   |                                                     |
| 47 |                                        |                 |   |   |            |   |                                                     |

|    |                   |               |   |   |   |              |   |                                                   |
|----|-------------------|---------------|---|---|---|--------------|---|---------------------------------------------------|
| 1  |                   |               |   |   |   |              |   |                                                   |
| 2  |                   |               |   |   |   |              |   |                                                   |
| 3  | Sofosbuvir        | Sovaldi       | 1 |   | 1 | 2013-12-13   | 1 | antivirals for systemic use                       |
| 4  |                   |               |   |   |   |              |   |                                                   |
| 5  | Umeclidinium      | Anoro ellipta |   | 1 | 1 | 2013-12-23   | 1 | drugs for obstructive airway diseases             |
| 6  | and vilanterol    |               |   |   |   |              |   |                                                   |
| 7  | Pomalidomide      | Pomalyst      | 1 |   | 1 | 2014-01-20   | 1 | immunosuppressants                                |
| 8  | Lomitapide        | Juxtapid      |   | 1 | 1 | 2014-02-04   | 1 | lipid modifying agents                            |
| 9  | Aflibercept       | Zaltrap       |   | 1 | 1 | 2014-02-12   |   | 1 antineoplastic agents                           |
| 10 | Bosutinibs        | Bosulif       |   | 1 | 1 | 1 2014-03-14 | 1 | antineoplastic agents                             |
| 11 | Recombinant       | Alprolix      |   | 1 | 1 | 2014-03-20   |   | 1 antihemorrhagics                                |
| 12 | human             |               |   |   |   |              |   |                                                   |
| 13 | coagulation       |               |   |   |   |              |   |                                                   |
| 14 | Factor IX, FC     |               |   |   |   |              |   |                                                   |
| 15 | fusion protein    |               |   |   |   |              |   |                                                   |
| 16 | Tofacitinib       | Xeljanz       |   | 1 | 1 | 2014-04-17   | 1 | immunosuppressants                                |
| 17 | Tesamorelin       | Egrifta       |   | 1 | 1 | 2014-04-29   | 1 | pituitary and hypothalamic hormones               |
| 18 |                   |               |   |   |   |              |   |                                                   |
| 19 | Canagliflozin     | Invokana      |   | 1 | 1 | 2014-05-23   | 1 | drugs used in diabetes                            |
| 20 | Taliglucerase     | Elelyso       |   | 1 | 1 | 2014-05-29   |   | 1 other alimentary tract and metabolism products  |
| 21 | Alfa              |               |   |   |   |              |   |                                                   |
| 22 | Eslicarbazepine   | Aptiom        |   | 1 | 1 | 2014-07-08   | 1 | antiepileptics                                    |
| 23 | Antihemophilic    | Eloctate      |   | 1 | 1 | 2014-08-22   |   | 1 antihemorrhagics                                |
| 24 | factor, FC fusion |               |   |   |   |              |   |                                                   |
| 25 | protein           |               |   |   |   |              |   |                                                   |
| 26 | Ledipasvir and    | Harvoni       |   | 1 | 1 | 2014-10-15   | 1 | antivirals for systemic use                       |
| 27 | sofosbuvir        |               |   |   |   |              |   |                                                   |
| 28 | Vortioxetine      | Trintellix    |   | 1 | 1 | 2014-10-22   | 1 | psychoanaleptics                                  |
| 29 | Simoctocog alfa   | Nuwiq         |   | 1 | 1 | 2014-10-23   |   | 1 antihemorrhagics                                |
| 30 | Azelastine and    | Dymista       |   | 1 | 1 | 2014-10-23   | 1 | nasal preparations                                |
| 31 | fluticasone       |               |   |   |   |              |   |                                                   |
| 32 | Conjugated        | Duavive       |   | 1 | 1 | 2014-10-23   | 1 | sex hormones and modulators of the genital system |
| 33 | estrogens and     |               |   |   |   |              |   |                                                   |
| 34 | bazedoxifene      |               |   |   |   |              |   |                                                   |
| 35 | acetate           |               |   |   |   |              |   |                                                   |
| 36 |                   |               |   |   |   |              |   |                                                   |
| 37 |                   |               |   |   |   |              |   |                                                   |
| 38 |                   |               |   |   |   |              |   |                                                   |
| 39 |                   |               |   |   |   |              |   |                                                   |
| 40 |                   |               |   |   |   |              |   |                                                   |
| 41 |                   |               |   |   |   |              |   |                                                   |
| 42 |                   |               |   |   |   |              |   |                                                   |
| 43 |                   |               |   |   |   |              |   |                                                   |
| 44 |                   |               |   |   |   |              |   |                                                   |
| 45 |                   |               |   |   |   |              |   |                                                   |
| 46 |                   |               |   |   |   |              |   |                                                   |
| 47 |                   |               |   |   |   |              |   |                                                   |

For peer review only

|    |                  |             |   |   |   |   |            |            |                    |                         |
|----|------------------|-------------|---|---|---|---|------------|------------|--------------------|-------------------------|
| 1  |                  |             |   |   |   |   |            |            |                    |                         |
| 2  |                  |             |   |   |   |   |            |            |                    |                         |
| 3  | Apremilast       | Otezla      |   | 1 | 1 |   | 2014-11-12 | 1          | immunosuppressants |                         |
| 4  | Ibrutinib        | Imbruvica   | 1 |   |   | 1 | 1          | 2014-11-17 | 1                  | antineoplastic agents   |
| 5  | Obinutuzumab     | Gazyva      | 1 |   | 1 |   |            | 2014-11-25 | 1                  | antineoplastic agents   |
| 6  | Siltuximab       | Sylvant     |   | 1 |   | 1 |            | 2014-12-03 | 1                  | immunosuppressants      |
| 7  | Dapagliflozin    | Forxiga     |   | 1 | 1 |   |            | 2014-12-12 | 1                  | drugs used in diabetes  |
| 8  | Ritonavir,       | Holkira Pak |   | 1 |   | 1 |            | 2014-12-22 | 1                  | antivirals for systemic |
| 9  | paritaprevir,    |             |   |   |   |   |            |            |                    | use                     |
| 10 | ombitasvir,      |             |   |   |   |   |            |            |                    |                         |
| 11 | dasabuvir        |             |   |   |   |   |            |            |                    |                         |
| 12 | Sodium           | Pheburane   |   | 1 |   | 1 |            | 2015-01-26 | 1                  | other alimentary tract  |
| 13 | phenylbutyrate   |             |   |   |   |   |            |            |                    | and metabolism products |
| 14 |                  |             |   |   |   |   |            |            |                    |                         |
| 15 | Vedolizumab      | Entyvio     |   | 1 | 1 |   |            | 2015-01-29 | 1                  | immunosuppressants      |
| 16 | Human            | Gardasil 9  |   | 1 | 1 |   |            | 2015-02-05 | 1                  | vaccines                |
| 17 | papillomavirus 9 |             |   |   |   |   |            |            |                    |                         |
| 18 | valent vaccine,  |             |   |   |   |   |            |            |                    |                         |
| 19 | recombinant      |             |   |   |   |   |            |            |                    |                         |
| 20 | Deferiprone      | Ferriprox   |   | 1 | 1 |   |            | 2015-02-13 | 1                  | all other therapeutic   |
| 21 |                  |             |   |   |   |   |            |            |                    | products                |
| 22 | Secukinumab      | Cosentyx    |   | 1 | 1 |   |            | 2015-02-27 | 1                  | immunosuppressants      |
| 23 | Tedizolid        | Sivextro    |   | 1 | 1 |   |            | 2015-03-17 | 1                  | antibacterials for      |
| 24 |                  |             |   |   |   |   |            |            |                    | systemic use            |
| 25 | Idelalisib       | Zydelig     |   | 1 | 1 |   | 1          | 2015-03-27 | 1                  | antineoplastic agents   |
| 26 | Ceritinib        | Zykadia     |   | 1 | 1 |   | 1          | 2015-03-27 | 1                  | antineoplastic agents   |
| 27 | Ponatinib        | Iclusig     |   | 1 | 1 |   | 1          | 2015-04-02 | 1                  | antineoplastic agents   |
| 28 | Carglumic Acid   | Carbaglu    | 1 |   |   | 1 |            | 2015-04-10 | 1                  | other alimentary tract  |
| 29 |                  |             |   |   |   |   |            |            |                    | and metabolism products |
| 30 |                  |             |   |   |   |   |            |            |                    |                         |
| 31 | Ivermectin       | Rosiver     |   | 1 | 1 |   |            | 2015-04-22 | 1                  | anthelmintics           |
| 32 | Levomilnacipran  | Fetzima     |   | 1 | 1 |   |            | 2015-05-08 | 1                  | psychoanaleptics        |
| 33 | Pembrolizumab    | Keytruda    |   | 1 | 1 |   | 1          | 2015-05-19 | 1                  | antineoplastic agents   |
| 34 | Naloxegol        | Movantik    |   | 1 | 1 |   |            | 2015-06-02 | 1                  | drugs for constipation  |
| 35 | Nintedanib       | Ofev        |   | 1 | 1 |   |            | 2015-06-25 | 1                  | antineoplastic agents   |
| 36 |                  |             |   |   |   |   |            |            |                    |                         |
| 37 |                  |             |   |   |   |   |            |            |                    |                         |
| 38 |                  |             |   |   |   |   |            |            |                    |                         |
| 39 |                  |             |   |   |   |   |            |            |                    |                         |
| 40 |                  |             |   |   |   |   |            |            |                    |                         |
| 41 |                  |             |   |   |   |   |            |            |                    |                         |
| 42 |                  |             |   |   |   |   |            |            |                    |                         |
| 43 |                  |             |   |   |   |   |            |            |                    |                         |
| 44 |                  |             |   |   |   |   |            |            |                    |                         |
| 45 |                  |             |   |   |   |   |            |            |                    |                         |
| 46 |                  |             |   |   |   |   |            |            |                    |                         |
| 47 |                  |             |   |   |   |   |            |            |                    |                         |



1  
2  
3  
4  
5  
6  
7  
8  
9  
10  
11  
12  
13  
14  
15  
16  
17  
18  
19  
20  
21  
22  
23  
24  
25  
26  
27  
28  
29  
30  
31  
32  
33  
34  
35  
36  
37  
38  
39  
40  
41  
42  
43  
44  
45  
46  
47

For peer review only

|                                                                                           |            |   |   |   |   |            |   |   |                                                         |
|-------------------------------------------------------------------------------------------|------------|---|---|---|---|------------|---|---|---------------------------------------------------------|
| Ramucirumab                                                                               | Cyramza    |   | 1 | 1 |   | 2015-07-16 |   | 1 | antineoplastic agents                                   |
| Empagliflozin                                                                             | Jardiance  |   | 1 | 1 |   | 2015-07-23 | 1 |   | drugs used in diabetes                                  |
| Mifepristone<br>and Misoprostol                                                           | Mifegymiso |   | 1 | 1 |   | 2015-07-29 | 1 |   | sex hormones and<br>modulators of the genital<br>svstem |
| Daclatasvir                                                                               | Daklinza   |   | 1 | 1 |   | 2015-08-13 | 1 | 1 | antivirals for systemic<br>use                          |
| Asfotase Alfa                                                                             | Strensiq   | 1 |   | 1 |   | 2015-08-14 |   | 1 | other alimentary tract<br>and metabolism products       |
| Teduglutide                                                                               | Revestive  |   | 1 |   | 1 | 2015-09-04 |   | 1 | other alimentary tract<br>and metabolism products       |
| Evolocumab                                                                                | Repatha    |   | 1 | 1 |   | 2015-09-10 |   | 1 | lipid modifying agents                                  |
| Nivolumab                                                                                 | Opdivo     | 1 |   |   | 1 | 2015-09-25 |   | 1 | antineoplastic agents                                   |
| Ceftolozane<br>Sulfate and<br>Tazobactam<br>Sodium                                        | Zerbaxa    |   | 1 | 1 |   | 2015-09-30 | 1 |   | antibacterials for<br>systemic use                      |
| Sacubitril,<br>Valsartan                                                                  | Entresto   | 1 |   |   | 1 | 2015-10-02 | 1 |   | agents acting on the<br>renin-angiotensin system        |
| Dulaglutide                                                                               | Trulicity  |   | 1 | 1 |   | 2015-11-10 |   | 1 | drugs used in diabetes                                  |
| Elvitegravir,<br>Cobicistat,<br>Emtricitabine,<br>Tenofovir<br>Alafenamide<br>Emrifiumate | Genvoya    |   | 1 | 1 |   | 2015-11-27 | 1 |   | antivirals for systemic<br>use                          |
| Mepolizumab                                                                               | Nucala     |   | 1 | 1 |   | 2015-12-03 |   | 1 | drugs for obstructive<br>airway diseases                |
| Lenvatinib                                                                                | Lenvima    |   | 1 | 1 |   | 2015-12-22 | 1 |   | antineoplastic agents                                   |
| Blinatumomab                                                                              | Blinicyto  |   | 1 | 1 |   | 2015-12-22 |   | 1 | antineoplastic agents                                   |
| Carfilzomib                                                                               | Kyprolis   |   | 1 |   | 1 | 2016-01-15 | 1 |   | antineoplastic agents                                   |

|    |                 |                |   |   |            |   |   |                          |
|----|-----------------|----------------|---|---|------------|---|---|--------------------------|
| 1  |                 |                |   |   |            |   |   |                          |
| 2  |                 |                |   |   |            |   |   |                          |
| 3  | Elbasvir,       | Zepatier       | 1 | 1 | 2016-01-19 | 1 |   | antivirals for systemic  |
| 4  | Grazoprevir     |                |   |   |            |   |   | use                      |
| 5  | Selexipag       | Uptravi        | 1 | 1 | 2016-01-20 | 1 |   | antithrombotic agents    |
| 6  | Ivacaftor,      | Orkambi        | 1 | 1 | 2016-01-26 | 1 |   | other respiratory system |
| 7  | Lumacaftor      |                |   |   |            |   |   | products                 |
| 8  | Sugammadex      | Bridion        | 1 | 1 | 2016-02-05 | 1 |   | all other therapeutic    |
| 9  |                 |                |   |   |            |   |   | products                 |
| 10 |                 |                |   |   |            |   |   | antineoplastic agents    |
| 11 | Cobimetinib     | Cotellic       | 1 | 1 | 2016-02-22 | 1 |   | antiepileptics           |
| 12 | Brivaracetam    | Brivlera       | 1 | 1 | 2016-03-09 | 1 |   | antivirals for systemic  |
| 13 | Asunaprevir     | Sunvepra       | 1 | 1 | 2016-03-09 | 1 |   | use                      |
| 14 |                 |                |   |   |            |   |   | antineoplastic agents    |
| 15 | Palbociclib     | Ibrance        | 1 | 1 | 2016-03-16 | 1 | 1 | lipid modifying agents   |
| 16 | Alirocumab      | Praluent       | 1 | 1 | 2016-04-11 |   |   | antihistamines for       |
| 17 | Bilastine       | Blexten        | 1 | 1 | 2016-04-21 | 1 |   | systemic use             |
| 18 |                 |                |   |   |            |   |   | all other therapeutic    |
| 19 | Idarucizumab    | Praxbind       | 1 | 1 | 2016-04-29 |   | 1 | products                 |
| 20 |                 |                |   |   |            |   |   | antineoplastic agents    |
| 21 | Olaparib        | Lynparza       | 1 | 1 | 2016-04-29 | 1 |   | immunosuppressants       |
| 22 | Ixekizumab      | Taltz          | 1 | 1 | 2016-05-25 |   | 1 | antineoplastic agents    |
| 23 | Osimertinib     | Tagrisso       | 1 | 1 | 2016-07-05 | 1 |   | antivirals for systemic  |
| 24 | Sofosbuvir +    | Epclusa        | 1 | 1 | 2016-07-11 | 1 |   | use                      |
| 25 | Velpatasvir     |                |   |   |            |   |   | antineoplastic agents    |
| 26 | Ixazomib        | Ninlaro        | 1 | 1 | 2016-08-04 | 1 |   | other alimentary tract   |
| 27 | Nitisinone      | MDK-Nitisinone | 1 | 1 | 2016-09-20 | 1 |   | and metabolism products  |
| 28 |                 |                |   |   |            |   |   |                          |
| 29 |                 |                |   |   |            |   |   |                          |
| 30 | Venetoclax      | Venclexta      | 1 | 1 | 2016-09-30 | 1 |   | antineoplastic agents    |
| 31 | Edoxaban        | Lixiana        | 1 | 1 | 2016-11-04 | 1 |   | antithrombotic agents    |
| 32 | Nitisinone      | Nitisinone     | 1 | 1 | 2016-11-04 | 1 |   | other alimentary tract   |
| 33 |                 |                |   |   |            |   |   | and metabolism products  |
| 34 |                 |                |   |   |            |   |   |                          |
| 35 |                 |                |   |   |            |   |   |                          |
| 36 |                 |                |   |   |            |   |   |                          |
| 37 |                 |                |   |   |            |   |   |                          |
| 38 | Daclizumab beta | Zinbryta       | 1 | 1 | 2016-12-08 |   | 1 | immunosuppressants       |
| 39 |                 |                |   |   |            |   |   |                          |
| 40 |                 |                |   |   |            |   |   |                          |
| 41 |                 |                |   |   |            |   |   |                          |
| 42 |                 |                |   |   |            |   |   |                          |
| 43 |                 |                |   |   |            |   |   |                          |
| 44 |                 |                |   |   |            |   |   |                          |
| 45 |                 |                |   |   |            |   |   |                          |
| 46 |                 |                |   |   |            |   |   |                          |
| 47 |                 |                |   |   |            |   |   |                          |

1  
2  
3  
4  
5  
6  
7  
8  
9  
10  
11  
12  
13  
14  
15  
16  
17  
18  
19  
20  
21  
22  
23  
24  
25  
26  
27  
28  
29  
30  
31  
32  
33  
34  
35  
36  
37  
38  
39  
40  
41  
42  
43  
44  
45  
46  
47

|            |         |    |     |     |     |            |    |     |                                                |
|------------|---------|----|-----|-----|-----|------------|----|-----|------------------------------------------------|
| Nitisinone | Orfadin | 1  |     | 1   |     | 2016-12-13 | 1  |     | other alimentary tract and metabolism products |
| Ivabradine | Lancora |    | 1   | 1   |     | 2016-12-23 | 1  |     | cardiac therapy                                |
|            |         | 55 | 454 | 379 | 130 |            | 42 | 286 | 99                                             |

**\*Prescrire evaluations as of February 20, 2018; PMPRB evaluations as of December 31, 2016; Prescrire ratings - offers an advantage, possibly helpful, nothing new, not acceptable; PMPRB ratings - category 3 = moderate, little or no improvement (prior to 2010), slight or no improvement, moderate improvement - primary, moderate improvement - secondary (2010 onwards)**

For peer review only

**Supplementary Table 2: All drugs approved between 1995-2016 that did not receive therapeutic assessments**

| Generic name                                | Brand name   | Review status |          |                                      | Notice of compliance or<br>Notice of compliance with conditions date | Small molecule | Biologic | ATC group (second level)                          |
|---------------------------------------------|--------------|---------------|----------|--------------------------------------|----------------------------------------------------------------------|----------------|----------|---------------------------------------------------|
|                                             |              | Standard      | Priority | Notice of compliance with conditions |                                                                      |                |          |                                                   |
| Levocarnitine                               | Carnitor     |               | 1        |                                      | 1995-01-19                                                           |                |          | other alimentary tract and metabolism products    |
| Losoxantrone                                | Bianda       | 1             |          |                                      | 1995-02-19                                                           |                |          | antineoplastic agents                             |
| Carvedilol                                  | Dilatrend    | 1             |          |                                      | 1995-02-27                                                           |                |          | beta blocking agents                              |
| Carvedilol                                  | Kredex       | 1             |          |                                      | 1995-02-27                                                           |                |          | beta blocking agents                              |
| Halofantrine                                | Halfan       | 1             |          |                                      | 1995-03-29                                                           |                |          | antiprotozoals                                    |
| Ceftibuten                                  | Cedax        | 1             |          |                                      | 1995-05-09                                                           |                |          | antibacterials for systemic use                   |
| Sermorelin                                  | Geref        | 1             |          |                                      | 1995-06-08                                                           |                |          | pituitary and hypothalamic hormones and analogues |
| Tetrabenazine                               | Nitoman      | 1             |          |                                      | 1995-12-29                                                           |                |          | other nervous system drugs                        |
| Iron dextran                                | Dexferrum    |               | 1        |                                      | 1996-01-09                                                           |                |          | antianemic preparations                           |
| Rimexolone                                  | Vexol        | 1             |          |                                      | 1996-01-17                                                           |                |          | corticosteroids for systemic use                  |
| Measles virus vaccine/Rubella virus vaccine | Moru-Viraten |               | 1        |                                      | 1996-02-26                                                           |                |          | vaccines                                          |
| Ferumoxsil                                  | Gastromark   | 1             |          |                                      | 1996-03-15                                                           |                |          | contrast media                                    |
| Saquinavir                                  | Saquinavir   |               | 1        |                                      | 1996-03-22                                                           |                |          | antivirals for systemic use                       |
| Pantoprazole                                | Panto-Byk    | 1             |          |                                      | 1996-07-05                                                           |                |          | drugs for acid related disorders                  |
| Dexfenfluramine                             | Redux        | 1             |          |                                      | 1996-07-29                                                           |                |          | antiobesity preparations                          |
| Palmitic acid/Galactose                     | Levovist     | 1             |          |                                      | 1996-07-31                                                           |                |          | contrast media                                    |
| Fleroxacin                                  | Megalone     | 1             |          |                                      | 1996-08-21                                                           |                |          | antibacterials for systemic use                   |

|    |                       |                    |   |   |            |                                 |
|----|-----------------------|--------------------|---|---|------------|---------------------------------|
| 1  |                       |                    |   |   |            |                                 |
| 2  |                       |                    |   |   |            |                                 |
| 3  | Reviparin             | Clivarine          | 1 |   | 1996-09-10 | antithrombotic agents           |
| 4  | Diphtheria, tetanus & | Infanrix           |   | 1 | 1996-12-17 | vaccines                        |
| 5  | acellular pertussis   |                    |   |   |            |                                 |
| 6  | vaccine               |                    |   |   |            |                                 |
| 7  | Cisatracurium         | Nimbex injectior   | 1 |   | 1996-12-18 | muscle relaxants                |
| 8  | Remifentanil          | Ultiva injection   | 1 |   | 1996-12-24 | anesthetics                     |
| 9  | Tiludronate           | Skelid             | 1 |   | 1997-02-06 | drugs for treatment of bone     |
| 10 |                       |                    |   |   |            | disease                         |
| 11 | Tazarotene            | Tazorac Gel        | 1 |   | 1997-02-25 | antipsoriatics                  |
| 12 | Praziquantel          | Biltricide         | 1 |   | 1997-03-07 | anthelmintics                   |
| 13 | Molgramostim          | Leucomax           |   | 1 | 1997-03-10 | immunostimulants                |
| 14 | Fosphenytoin          | Cerebyx injectioi  | 1 |   | 1997-03-20 | antiepileptics                  |
| 15 | Butenafine            | Dr. Scholl's athle | 1 |   | 1997-04-15 | antifungals for dermatological  |
| 16 |                       |                    |   |   |            | use                             |
| 17 | Troglitazone          | Rezulin            |   | 1 | 1997-05-09 | drugs used in diabetes          |
| 18 | Trandolapril          | Odrik              | 1 |   | 1997-05-15 | agents acting on the renin-     |
| 19 |                       |                    |   |   |            | angiotensin system              |
| 20 | Follitropin alpha     | Gonal-F            | 1 |   | 1997-06-06 | sex hormones and modulators     |
| 21 |                       |                    |   |   |            | of the genital system           |
| 22 | Kit for preparation   | Myoscint           | 1 |   | 1997-07-02 | diagnostic radiopharmaceuticals |
| 23 | of indium in 111      |                    |   |   |            |                                 |
| 24 | imciromab             |                    |   |   |            |                                 |
| 25 | pentetate             |                    |   |   |            |                                 |
| 26 | Cytomegalovirus       | Cytogam            | 1 |   | 1997-08-01 | immune sera and                 |
| 27 | immune globulin       |                    |   |   |            | immunoglobulins                 |
| 28 | Oxiconazole           | Oxizole            | 1 |   | 1997-08-08 | antifungals for dermatological  |
| 29 |                       |                    |   |   |            | use                             |
| 30 | Respiratory           | Respigam           |   | 1 | 1997-08-20 | immune sera and                 |
| 31 | syncytial virus       |                    |   |   |            | immunoglobulins                 |
| 32 | immune globulin       |                    |   |   |            |                                 |
| 33 | Arcitumomab           | CEA-Scan           | 1 |   | 1997-09-16 | diagnostic radiopharmaceuticals |
| 34 |                       |                    |   |   |            |                                 |
| 35 |                       |                    |   |   |            |                                 |
| 36 |                       |                    |   |   |            |                                 |
| 37 |                       |                    |   |   |            |                                 |
| 38 |                       |                    |   |   |            |                                 |
| 39 |                       |                    |   |   |            |                                 |
| 40 |                       |                    |   |   |            |                                 |
| 41 |                       |                    |   |   |            |                                 |
| 42 |                       |                    |   |   |            |                                 |
| 43 |                       |                    |   |   |            |                                 |
| 44 |                       |                    |   |   |            |                                 |
| 45 |                       |                    |   |   |            |                                 |
| 46 |                       |                    |   |   |            |                                 |
| 47 |                       |                    |   |   |            |                                 |

|    |                                       |                   |   |            |   |                                   |
|----|---------------------------------------|-------------------|---|------------|---|-----------------------------------|
| 1  |                                       |                   |   |            |   |                                   |
| 2  |                                       |                   |   |            |   |                                   |
| 3  | Olopatadine                           | Patanol           | 1 | 1997-09-16 |   | ophthalmologicals                 |
| 4  |                                       |                   |   |            |   |                                   |
| 5  | Pegaspargase                          | Oncaspar          | 1 | 1997-11-19 |   | antineoplastic agents             |
| 6  |                                       |                   |   |            |   |                                   |
| 7  | Anagrelide as hydrochloride           | Agrylin           | 1 | 1997-11-19 |   | antineoplastic agents             |
| 8  |                                       |                   |   |            |   |                                   |
| 9  | Nadroparin                            | Fraxiparine       | 1 | 1997-11-27 |   | antithrombotic agents             |
| 10 | Bicisate                              | OncoScint         | 1 | 1998-01-16 |   | diagnostic radiopharmaceuticals   |
| 11 |                                       |                   |   |            |   |                                   |
| 12 | Gadolinium (III)                      | Gadolite          | 1 | 1998-04-08 |   | contrast media                    |
| 13 | Lexidronam                            | Quadramet         | 1 | 1998-06-22 |   | therapeutic radiopharmaceuticals  |
| 14 |                                       |                   |   |            |   |                                   |
| 15 | Miglitol                              | Glyset            | 1 | 1998-07-22 |   | drugs used in diabetes            |
| 16 |                                       |                   |   |            |   |                                   |
| 17 | Lipoprotein-OspA antigen              | Lymerix           | 1 | 1998-12-02 |   | vaccines                          |
| 18 |                                       |                   |   |            |   |                                   |
| 19 | recombinant                           |                   |   |            |   |                                   |
| 20 | Toremifene                            | Fareston          | 1 | 1998-12-14 |   | endocrine therapy                 |
| 21 |                                       |                   |   |            |   |                                   |
| 22 | Cefdinir                              | Omnicef           | 1 | 1999-02-05 |   | antibacterials for systemic use   |
| 23 |                                       |                   |   |            |   |                                   |
| 24 | Methacholine                          | Methacoline       | 1 | 1999-02-25 |   | diagnostic agents                 |
| 25 |                                       |                   |   |            |   |                                   |
| 26 | Fosfomycin                            | Monurol           | 1 | 1999-04-12 |   | antibacterials for systemic use   |
| 27 |                                       |                   |   |            |   |                                   |
| 28 | Alitretinoin                          | Panretin          | 1 | 1999-06-11 |   | other dermatological preparations |
| 29 |                                       |                   |   |            |   |                                   |
| 30 | Ioxilan                               | Oxilan            | 1 | 1999-10-05 |   | contrast media                    |
| 31 |                                       |                   |   |            |   |                                   |
| 32 | Mangafodipir                          | Teslascan         | 1 | 2000-02-09 | 1 | contrast media                    |
| 33 |                                       |                   |   |            |   |                                   |
| 34 | Sevelamer                             | Renagel           | 1 | 2000-02-24 | 1 | all other therapeutic products    |
| 35 |                                       |                   |   |            |   |                                   |
| 36 | Valrubicin                            | Valstar           | 1 | 2000-07-04 | 1 | antineoplastic agents             |
| 37 |                                       |                   |   |            |   |                                   |
| 38 | Ibutilide                             | Corvert injection | 1 | 2000-07-14 | 1 | cardiac therapy                   |
| 39 |                                       |                   |   |            |   |                                   |
| 40 | Fomepizole                            | Antizol           | 1 | 2000-11-30 | 1 | all other therapeutic products    |
| 41 |                                       |                   |   |            |   |                                   |
| 42 | Amlexanox                             | Apthera           | 1 | 2000-12-11 | 1 | stomatological preparations       |
| 43 |                                       |                   |   |            |   |                                   |
| 44 | Tegafur/uracil and leucovorin calcium | Orzel             | 1 | 2001-04-06 | 1 | antineoplastic agents             |
| 45 |                                       |                   |   |            |   |                                   |
| 46 | Argatroban                            | Argatroban        | 1 | 2001-06-04 | 1 | antithrombotic agents             |
| 47 |                                       |                   |   |            |   |                                   |

|    |                     |               |   |   |            |   |                                   |
|----|---------------------|---------------|---|---|------------|---|-----------------------------------|
| 1  |                     |               |   |   |            |   |                                   |
| 2  |                     |               |   |   |            |   |                                   |
| 3  | Aminolevulinic acid | Levulan       | 1 |   | 2001-06-20 | 1 | antineoplastic agents             |
| 4  | Infliximab          | Remicade      |   | 1 | 2001-09-27 |   | 1 immunosuppressants              |
| 5  |                     |               |   |   |            |   |                                   |
| 6  | Levobupivacaine     | Chirocaine    | 1 |   | 2002-03-20 | 1 | anesthetics                       |
| 7  | Unoprostone         | Rescula       | 1 |   | 2002-04-03 | 1 | ophthalmologicals                 |
| 8  | isopropyl           |               |   |   |            |   |                                   |
| 9  | Thyrotropin         | Thyrogen      | 1 |   | 2002-05-31 |   | 1 diagnostic agents               |
| 10 | Anti-thymocyte      | Thymoglobulin | 1 |   | 2002-11-20 |   | 1 immunosuppressants              |
| 11 | globulin            |               |   |   |            |   |                                   |
| 12 | Dextromethylpheni   | Attenade      | 1 |   | 2003-08-12 | 1 | psychoanaleptics                  |
| 13 | date                |               |   |   |            |   |                                   |
| 14 | Sulfur Hexafluoride | Sonovue       | 1 |   | 2004-02-12 | 1 | contrast media                    |
| 15 | Yttrium-90          | Yttrium-90    |   | 1 | 2004-12-02 |   | 1 therapeutic                     |
| 16 |                     |               |   |   |            |   | radiopharmaceuticals              |
| 17 | Choriogonadotropin  | Ovidrel       | 1 |   | 2004-12-16 |   | 1 sex hormones and modulators     |
| 18 | Alfa                |               |   |   |            |   | of the genital system             |
| 19 | Sulesomab           | Leukoscan     | 1 |   | 2005-01-17 |   | 1 diagnostic radiopharmaceuticals |
| 20 |                     |               |   |   |            |   |                                   |
| 21 | Tositumomab         | Bexxar        |   | 1 | 2005-08-18 |   | 1 therapeutic                     |
| 22 |                     |               |   |   |            |   | radiopharmaceuticals              |
| 23 | Nitric oxide        | Inomax        |   | 1 | 2005-09-23 | 1 | other respiratory system          |
| 24 |                     |               |   |   |            |   | products                          |
| 25 | F-                  | Cantrace      |   | 1 | 2006-07-27 |   | 1 diagnostic radiopharmaceuticals |
| 26 | Fluorodeoxyglucose  |               |   |   |            |   |                                   |
| 27 | Lumiracoxib         | Prexige       | 1 |   | 2006-11-02 | 1 | antiinflammatory and              |
| 28 |                     |               |   |   |            |   | antirheumatic products            |
| 29 | Nelarabine          | Atriance      |   | 1 | 2007-09-22 | 1 | antineoplastic agents             |
| 30 | Rotavirus vaccine   | Rotarix       | 1 |   | 2007-10-09 |   | 1 vaccines                        |
| 31 |                     |               |   |   |            |   |                                   |
| 32 | Retapamulin         | Altargo       | 1 |   | 2008-03-19 | 1 | antibiotics and                   |
| 33 |                     |               |   |   |            |   | chemotherapeutics for             |
| 34 |                     |               |   |   |            |   | dermatological use                |
| 35 |                     |               |   |   |            |   |                                   |
| 36 |                     |               |   |   |            |   |                                   |
| 37 |                     |               |   |   |            |   |                                   |
| 38 |                     |               |   |   |            |   |                                   |
| 39 |                     |               |   |   |            |   |                                   |
| 40 |                     |               |   |   |            |   |                                   |
| 41 |                     |               |   |   |            |   |                                   |
| 42 |                     |               |   |   |            |   |                                   |
| 43 |                     |               |   |   |            |   |                                   |
| 44 |                     |               |   |   |            |   |                                   |
| 45 |                     |               |   |   |            |   |                                   |
| 46 |                     |               |   |   |            |   |                                   |
| 47 |                     |               |   |   |            |   |                                   |

|    |                      |                   |   |            |   |   |                                 |
|----|----------------------|-------------------|---|------------|---|---|---------------------------------|
| 1  |                      |                   |   |            |   |   |                                 |
| 2  |                      |                   |   |            |   |   |                                 |
| 3  | Methoxy              | Mircera           | 1 | 2008-03-31 |   | 1 | antianemic preparations         |
| 4  | Polyethylene glycol- |                   |   |            |   |   |                                 |
| 5  | epoetin beta         |                   |   |            |   |   |                                 |
| 6  | Telavancin           | Vibativ           | 1 | 2009-09-29 | 1 |   | antibacterials for systemic use |
| 7  | Human C1 esterase    | Berinert          | 1 | 2010-05-31 |   | 1 | other hematological agents      |
| 8  | inhibitor            |                   |   |            |   |   |                                 |
| 9  | Influenza vaccine    | Flumist           | 1 | 2010-06-22 |   | 1 | vaccines                        |
| 10 | Zucapsaicin          | Civanex (Zuacta   | 1 | 2010-07-15 | 1 |   | topical products for joint and  |
| 11 |                      |                   |   |            |   |   | muscular pain                   |
| 12 |                      |                   |   |            |   |   |                                 |
| 13 | Clevidipine          | Cleviprex         | 1 | 2011-04-15 | 1 |   | calcium channel blockers        |
| 14 | Rubidium chloride rb | Ruby-fill         |   | 2011-09-20 |   | 1 | diagnostic radiopharmaceuticals |
| 15 | 82                   |                   | 1 |            |   |   |                                 |
| 16 | Doxycycline          | Efracea           | 1 | 2011-11-14 | 1 |   | antibacterials for systemic use |
| 17 | Ferumoxytol          | Feraheme          | 1 | 2011-12-08 | 1 |   | antianemic preparations         |
| 18 | Remestemcel-L        | Prochymal         |   | 2012-05-17 |   | 1 | unassigned                      |
| 19 | Ezogabine            | Potiga            | 1 | 2012-10-08 | 1 |   | antiepileptics                  |
| 20 | Haemagglutinin-      | Arepranrix H5N1   | 1 | 2013-02-13 |   | 1 | vaccines                        |
| 21 | Strain A             |                   |   |            |   |   |                                 |
| 22 | Olodaterol           | Striverdi respim: | 1 | 2013-06-11 | 1 |   | drugs for obstructive airway    |
| 23 |                      |                   |   |            |   |   | diseases                        |
| 24 | Difluprednate        | Durezol           | 1 | 2013-11-04 | 1 |   | corticosteroids, dermatological |
| 25 |                      |                   |   |            |   |   | preparations                    |
| 26 | Tafluprost           | Saflutan          | 1 | 2014-05-26 | 1 |   | ophthalmologicals               |
| 27 | Elosulfase Alfa      | Vimizim           |   | 2014-07-02 |   | 1 | other alimentary tract and      |
| 28 |                      |                   | 1 |            |   |   | metabolism products             |
| 29 | Turoctocog alfa      | Zonovate          | 1 | 2014-12-08 |   | 1 | antihemorrhagics                |
| 30 | Bromfenac            | Prolensa          | 1 | 2015-03-26 | 1 |   | ophthalmologicals               |
| 31 | Albiglutide          | Eperzan           | 1 | 2015-07-15 |   | 1 | drugs used in diabetes          |
| 32 | Vilazodone           | Viibryd           | 1 | 2015-07-16 | 1 |   | psychoanaleptics                |
| 33 | Polidocanol          | Varithena         | 1 | 2015-08-04 | 1 |   | vasoprotectives                 |
| 34 | Peginterferon Beta-  | Plegridy          | 1 | 2015-08-10 |   | 1 | immunostimulants                |
| 35 | 1A                   |                   |   |            |   |   |                                 |
| 36 |                      |                   |   |            |   |   |                                 |
| 37 |                      |                   |   |            |   |   |                                 |
| 38 |                      |                   |   |            |   |   |                                 |
| 39 |                      |                   |   |            |   |   |                                 |
| 40 |                      |                   |   |            |   |   |                                 |
| 41 |                      |                   |   |            |   |   |                                 |
| 42 |                      |                   |   |            |   |   |                                 |
| 43 |                      |                   |   |            |   |   |                                 |
| 44 |                      |                   |   |            |   |   |                                 |
| 45 |                      |                   |   |            |   |   |                                 |
| 46 |                      |                   |   |            |   |   |                                 |
| 47 |                      |                   |   |            |   |   |                                 |



|    |                      |            |   |   |            |   |                                 |
|----|----------------------|------------|---|---|------------|---|---------------------------------|
| 1  |                      |            |   |   |            |   |                                 |
| 2  |                      |            |   |   |            |   |                                 |
| 3  | Antihemophilic       | Obizur     | 1 |   | 2015-10-14 | 1 | antihemorrhagics                |
| 4  | Factor               |            |   |   |            |   |                                 |
| 5  | (Recombinant)        |            |   |   |            |   |                                 |
| 6  | Porcine Sequence     |            |   |   |            |   |                                 |
| 7  | Lubiprostone         | Amitiza    | 1 |   | 2015-10-14 | 1 | drugs for constipation          |
| 8  | Albutrepenonacog     | Idelvion   | 1 |   | 2016-01-26 | 1 | antihemorrhagics                |
| 9  | Alfa                 |            |   |   |            |   |                                 |
| 10 | Finafloxacin         | Xtoro      | 1 |   | 2016-03-11 | 1 | otologicals                     |
| 11 | Glycerol             | Ravicti    |   | 1 | 2016-03-16 | 1 | other alimentary tract and      |
| 12 | Phenylbutyrate       |            |   |   |            |   | metabolism products             |
| 13 | Vorapaxar            | Zontivity  | 1 |   | 2016-05-13 | 1 | antithrombotic agents           |
| 14 | Elotuzumab           | Empliciti  |   | 1 | 2016-06-21 | 1 | antineoplastic agents           |
| 15 | Daratumumab          | Darzalex   |   | 1 | 2016-06-29 | 1 | antineoplastic agents           |
| 16 | Rupatadine           | Rupall     | 1 |   | 2016-07-20 | 1 | antihistamines for systemic use |
| 17 |                      |            |   |   |            |   |                                 |
| 18 | Reslizumab           | Cinqair    | 1 |   | 2016-07-20 | 1 | drugs for obstructive airway    |
| 19 |                      |            |   |   |            |   | diseases                        |
| 20 | Bepotastine          | Bepreve    | 1 |   | 2016-07-27 | 1 | antihistamines for systemic use |
| 21 |                      |            |   |   |            |   |                                 |
| 22 | Alectinib            | Alecensaro |   | 1 | 2016-09-29 | 1 | antineoplastic agents           |
| 23 | Antihemophilic       | Adynovate  | 1 |   | 2016-11-17 | 1 | antihemorrhagics                |
| 24 | Factor               |            |   |   |            |   |                                 |
| 25 | (Recombinant),       |            |   |   |            |   |                                 |
| 26 | PFGvlated            |            |   |   |            |   |                                 |
| 27 | Gadoterate           | Dotarem    | 1 |   | 2016-11-25 | 1 | contrast media                  |
| 28 | Meglumine            |            |   |   |            |   |                                 |
| 29 | Botulinium antitoxin | BAT        | 1 |   | 2016-12-08 | 1 | immune sera and                 |
| 30 | serotypes A, B,C, D, |            |   |   |            |   | immunoglobulins                 |
| 31 | E, F and G           |            |   |   |            |   |                                 |
| 32 | Lonococog Alfa       | Afstyla    | 1 |   | 2016-12-12 | 1 | antihemorrhagics                |
| 33 |                      |            |   |   |            |   |                                 |
| 34 |                      |            |   |   |            |   |                                 |
| 35 |                      |            |   |   |            |   |                                 |
| 36 |                      |            |   |   |            |   |                                 |
| 37 |                      |            |   |   |            |   |                                 |
| 38 |                      |            |   |   |            |   |                                 |
| 39 |                      |            |   |   |            |   |                                 |
| 40 |                      |            |   |   |            |   |                                 |
| 41 |                      |            |   |   |            |   |                                 |
| 42 |                      |            |   |   |            |   |                                 |
| 43 |                      |            |   |   |            |   |                                 |
| 44 |                      |            |   |   |            |   |                                 |
| 45 |                      |            |   |   |            |   |                                 |
| 46 |                      |            |   |   |            |   |                                 |
| 47 |                      |            |   |   |            |   |                                 |

## STROBE Statement—checklist of items that should be included in reports of observational studies

|                              | Item No | Recommendation                                                                                                                                                                                                                                                                                                                                                                                                                                                         | Location in study             |
|------------------------------|---------|------------------------------------------------------------------------------------------------------------------------------------------------------------------------------------------------------------------------------------------------------------------------------------------------------------------------------------------------------------------------------------------------------------------------------------------------------------------------|-------------------------------|
| <b>Title and abstract</b>    | 1       | (a) Indicate the study's design with a commonly used term in the title or the abstract                                                                                                                                                                                                                                                                                                                                                                                 | Title, page 1                 |
|                              |         | (b) Provide in the abstract an informative and balanced summary of what was done and what was found                                                                                                                                                                                                                                                                                                                                                                    | Structured summary, pages 2-3 |
| <b>Introduction</b>          |         |                                                                                                                                                                                                                                                                                                                                                                                                                                                                        |                               |
| Background/rationale         | 2       | Explain the scientific background and rationale for the investigation being reported                                                                                                                                                                                                                                                                                                                                                                                   | Introduction, page 5          |
| Objectives                   | 3       | State specific objectives, including any prespecified hypotheses                                                                                                                                                                                                                                                                                                                                                                                                       | Introduction, page 6          |
| <b>Methods</b>               |         |                                                                                                                                                                                                                                                                                                                                                                                                                                                                        |                               |
| Study design                 | 4       | Present key elements of study design early in the paper                                                                                                                                                                                                                                                                                                                                                                                                                | Methods, pages 6-8            |
| Setting                      | 5       | Describe the setting, locations, and relevant dates, including periods of recruitment, exposure, follow-up, and data collection                                                                                                                                                                                                                                                                                                                                        | Methods, pages 6-8, 10        |
| Participants                 | 6       | (a) <i>Cohort study</i> —Give the eligibility criteria, and the sources and methods of selection of participants. Describe methods of follow-up<br><i>Case-control study</i> —Give the eligibility criteria, and the sources and methods of case ascertainment and control selection. Give the rationale for the choice of cases and controls<br><i>Cross-sectional study</i> —Give the eligibility criteria, and the sources and methods of selection of participants | Methods, pages 6, 7           |
|                              |         | (b) <i>Cohort study</i> —For matched studies, give matching criteria and number of exposed and unexposed<br><i>Case-control study</i> —For matched studies, give matching criteria and the number of controls per case                                                                                                                                                                                                                                                 |                               |
| Variables                    | 7       | Clearly define all outcomes, exposures, predictors, potential confounders, and effect modifiers. Give diagnostic criteria, if applicable                                                                                                                                                                                                                                                                                                                               | Methods, pages 8-10           |
| Data sources/<br>measurement | 8*      | For each variable of interest, give sources of data and details of methods of assessment (measurement). Describe comparability of assessment methods if there is more than one group                                                                                                                                                                                                                                                                                   | Methods, pages 7-10           |
| Bias                         | 9       | Describe any efforts to address potential sources of bias                                                                                                                                                                                                                                                                                                                                                                                                              | Not relevant                  |
| Study size                   | 10      | Explain how the study size was arrived at                                                                                                                                                                                                                                                                                                                                                                                                                              | Not relevant                  |
| Quantitative<br>variables    | 11      | Explain how quantitative variables were handled in the analyses. If applicable, describe which groupings were chosen and why                                                                                                                                                                                                                                                                                                                                           | Not relevant                  |
| Statistical methods          | 12      | (a) Describe all statistical methods, including those used to control for confounding                                                                                                                                                                                                                                                                                                                                                                                  | Methods, page 10              |
|                              |         | (b) Describe any methods used to examine subgroups and interactions                                                                                                                                                                                                                                                                                                                                                                                                    | Methods, pages 9, 10          |

|    |                   |     |                                                                     |                      |
|----|-------------------|-----|---------------------------------------------------------------------|----------------------|
| 1  |                   |     | (c) Explain how missing data were addressed                         | Not relevant         |
| 2  |                   |     | (d) <i>Cohort study</i> —If applicable, explain how loss to follow- | Not relevant         |
| 3  |                   |     | up was addressed                                                    |                      |
| 4  |                   |     | <i>Case-control study</i> —If applicable, explain how matching of   |                      |
| 5  |                   |     | cases and controls was addressed                                    |                      |
| 6  |                   |     | <i>Cross-sectional study</i> —If applicable, describe analytical    |                      |
| 7  |                   |     | methods taking account of sampling strategy                         |                      |
| 8  |                   |     | (e) Describe any sensitivity analyses                               | Not relevant         |
| 9  |                   |     |                                                                     |                      |
| 10 |                   |     |                                                                     |                      |
| 11 |                   |     |                                                                     |                      |
| 12 |                   |     |                                                                     |                      |
| 13 | <b>Results</b>    |     |                                                                     |                      |
| 14 | Participants      | 13* | (a) Report numbers of individuals at each stage of study—eg         | Results, pages 10-12 |
| 15 |                   |     | numbers potentially eligible, examined for eligibility,             |                      |
| 16 |                   |     | confirmed eligible, included in the study, completing follow-       |                      |
| 17 |                   |     | up, and analysed                                                    |                      |
| 18 |                   |     | (b) Give reasons for non-participation at each stage                |                      |
| 19 |                   |     | (c) Consider use of a flow diagram                                  | Not relevant         |
| 20 |                   |     |                                                                     |                      |
| 21 | Descriptive data  | 14* | (a) Give characteristics of study participants (eg                  | Not relevant         |
| 22 |                   |     | demographic, clinical, social) and information on exposures         |                      |
| 23 |                   |     | and potential confounders                                           |                      |
| 24 |                   |     | (b) Indicate number of participants with missing data for           | Results, page 13     |
| 25 |                   |     | each variable of interest                                           |                      |
| 26 |                   |     | (c) <i>Cohort study</i> —Summarise follow-up time (eg, average      | Not relevant         |
| 27 |                   |     | and total amount)                                                   |                      |
| 28 |                   |     |                                                                     |                      |
| 29 | Outcome data      | 15* | <i>Cohort study</i> —Report numbers of outcome events or            | Results, pages 11-15 |
| 30 |                   |     | summary measures over time                                          |                      |
| 31 |                   |     | <i>Case-control study</i> —Report numbers in each exposure          |                      |
| 32 |                   |     | category, or summary measures of exposure                           |                      |
| 33 |                   |     | <i>Cross-sectional study</i> —Report numbers of outcome events      |                      |
| 34 |                   |     | or summary measures                                                 |                      |
| 35 |                   |     |                                                                     |                      |
| 36 | Main results      | 16  | (a) Give unadjusted estimates and, if applicable, confounder-       |                      |
| 37 |                   |     | adjusted estimates and their precision (eg, 95% confidence          |                      |
| 38 |                   |     | interval). Make clear which confounders were adjusted for           |                      |
| 39 |                   |     | and why they were included                                          |                      |
| 40 |                   |     | (b) Report category boundaries when continuous variables            | Not relevant         |
| 41 |                   |     | were categorized                                                    |                      |
| 42 |                   |     | (c) If relevant, consider translating estimates of relative risk    | Not relevant         |
| 43 |                   |     | into absolute risk for a meaningful time period                     |                      |
| 44 |                   |     |                                                                     |                      |
| 45 | Other analyses    | 17  | Report other analyses done—eg analyses of subgroups and             | Not relevant         |
| 46 |                   |     | interactions, and sensitivity analyses                              |                      |
| 47 |                   |     |                                                                     |                      |
| 48 |                   |     |                                                                     |                      |
| 49 | <b>Discussion</b> |     |                                                                     |                      |
| 50 | Key results       | 18  | Summarise key results with reference to study objectives            | Discussion, page 16  |
| 51 | Limitations       | 19  | Discuss limitations of the study, taking into account sources of    | Limitations, page 19 |
| 52 |                   |     | potential bias or imprecision. Discuss both direction and           |                      |
| 53 |                   |     | magnitude of any potential bias                                     |                      |
| 54 |                   |     |                                                                     |                      |
| 55 | Interpretation    | 20  | Give a cautious overall interpretation of results considering       | Conclusion, page 19  |
| 56 |                   |     | objectives, limitations, multiplicity of analyses, results from     |                      |
| 57 |                   |     | similar studies, and other relevant evidence                        |                      |
| 58 |                   |     |                                                                     |                      |
| 59 |                   |     |                                                                     |                      |
| 60 |                   |     |                                                                     |                      |

|   |                  |    |                                                               |
|---|------------------|----|---------------------------------------------------------------|
| 1 |                  |    |                                                               |
| 2 | Generalisability | 21 | Discuss the generalisability (external validity) of the study |
| 3 |                  |    | results                                                       |
| 4 | <hr/>            |    |                                                               |

5 **Other information**

|   |         |    |                                                                   |         |
|---|---------|----|-------------------------------------------------------------------|---------|
| 6 | Funding | 22 | Give the source of funding and the role of the funders for the    | Page 20 |
| 7 |         |    | present study and, if applicable, for the original study on which |         |
| 8 |         |    | the present article is based                                      |         |

9

10 \*Give information separately for cases and controls in case-control studies and, if applicable, for exposed and

11 unexposed groups in cohort and cross-sectional studies.

12

13

14 **Note:** An Explanation and Elaboration article discusses each checklist item and gives methodological background and

15 published examples of transparent reporting. The STROBE checklist is best used in conjunction with this article (freely

16 available on the Web sites of PLoS Medicine at <http://www.plosmedicine.org/>, Annals of Internal Medicine at

17 <http://www.annals.org/>, and Epidemiology at <http://www.epidem.com/>). Information on the STROBE Initiative is

18 available at [www.strobe-statement.org](http://www.strobe-statement.org).

19

20

21

22

23

24

25

26

27

28

29

30

31

32

33

34

35

36

37

38

39

40

41

42

43

44

45

46

47

48

49

50

51

52

53

54

55

56

57

58

59

60

# BMJ Open

## Health Canada's use of expedited review pathways and therapeutic innovation, 1995-2016: cross sectional analysis

|                                 |                                                                                                                                               |
|---------------------------------|-----------------------------------------------------------------------------------------------------------------------------------------------|
| Journal:                        | <i>BMJ Open</i>                                                                                                                               |
| Manuscript ID                   | bmjopen-2018-023605.R2                                                                                                                        |
| Article Type:                   | Research                                                                                                                                      |
| Date Submitted by the Author:   | 19-Jul-2018                                                                                                                                   |
| Complete List of Authors:       | Lexchin, Joel; York University, School of Health Policy & Management                                                                          |
| <b>Primary Subject Heading</b>: | Health policy                                                                                                                                 |
| Secondary Subject Heading:      | Health services research, Pharmacology and therapeutics                                                                                       |
| Keywords:                       | Health policy < HEALTH SERVICES ADMINISTRATION & MANAGEMENT, accelerated approvals, Health Canada, therapeutic evaluation, therapeutic groups |
|                                 |                                                                                                                                               |

SCHOLARONE™  
Manuscripts

Only

1  
2  
3 **1 Health Canada's use of expedited review pathways and therapeutic innovation, 1995-**  
4  
5 **2 2016: cross sectional analysis**  
6

7  
8 3 Joel Lexchin MSc, MD<sup>1,2,3</sup>  
9

10 4 <sup>1</sup>Professor Emeritus

11  
12 5 School of Health Policy and Management

13  
14 6 York University

15  
16 7 <sup>2</sup>Emergency Physician

17  
18 8 University Health Network

19  
20 9 <sup>3</sup>Associate Professor

21  
22 10 Faculty of Medicine

23  
24 11 University of Toronto

25  
26 12

27  
28 13 Correspondence:

29  
30 14 Joel Lexchin MD

31  
32 15 School of Health Policy and Management

33  
34 16 York University

35  
36 17 4700 Keele St.

37  
38 18 Toronto, ON M3J 1P3

39  
40 19 Tel: 416-964-7186

41  
42 20 Email: [jlexchin@yorku.ca](mailto:jlexchin@yorku.ca)

43  
44 21 ORCID ID: 0000-0001-5120-8029

45  
46 22 **Key words:**

47  
48 23 expedited approvals, Health Canada, health policy, therapeutic evaluation, therapeutic group

49  
50 24 **Word count:**

51  
52 25 3077

1  
2  
3 26 **Structured summary**  
4

5 27 **Objectives**  
6  
7

8 28 This study examines the use of expedited approval pathways by Health Canada over the  
9  
10 29 period 1995 to 2016 inclusive and the relationship between the use of these pathways and the  
11  
12 30 therapeutic gain offered by new products.  
13  
14

15 31 **Design**  
16  
17

18 32 Cross sectional study.  
19  
20  
21

22 33 **Data sources**  
23  
24

25 34 Therapeutic Products Directorate, Biologics and Genetic Therapies Directorate, Notice of  
26  
27 35 Compliance database, Notice of Compliance with conditions web site, Patented Medicine  
28  
29 36 Prices Review Board, La revue Prescrire, World Health Organization (WHO) Anatomical  
30  
31 37 Therapeutic Chemical (ATC) classification system.  
32  
33  
34

35 38 **Interventions**  
36  
37

38 39 None  
39  
40  
41

42 40 **Primary and secondary outcomes**  
43  
44

45 41 Percent of new drugs evaluated by Health Canada that went through an expedited pathway  
46  
47 42 between 1995 and 2016 inclusive. Kappa values comparing the review status to assessments  
48  
49 43 of therapeutic value for individual drugs.  
50  
51

52 44 **Results**  
53  
54  
55  
56  
57  
58  
59  
60

1  
2  
3 45 Of 623 drugs approved by Health Canada between 1995 and 2016, 438 (70.3%) drugs went  
4  
5 46 through the standard pathway, 185 (29.7%) an expedited pathway. Therapeutic evaluations  
6  
7 47 were available for 509 drugs. Health Canada used an expedited approval pathway for 159 of  
8  
9 48 the 509 drugs whereas only 55 were judged to be therapeutically innovative. Forty-two of the  
10  
11 49 55 therapeutically innovative drugs received an expedited review and 13 received a standard  
12  
13 50 review. The Kappa value for the entire period for all 509 drugs was 0.276 (95% CI 0.194,  
14  
15 51 0.359) indicating “fair” agreement between Health Canada’s use of expedited pathways and  
16  
17 52 independent evaluations of therapeutic innovation.  
18  
19  
20

### 21 **Conclusion**

22  
23  
24 54 Health Canada’s use of expedited approvals was stable over the entire time period. It was  
25  
26 55 unable to reliably predict which drugs will offer major therapeutic gains. The findings in this  
27  
28 56 study should provoke a discussion about whether Health Canada should continue to use these  
29  
30 57 pathways and if so how their use can be improved.  
31  
32  
33  
34  
35  
36  
37  
38  
39  
40  
41  
42  
43  
44  
45  
46  
47  
48  
49  
50  
51  
52  
53  
54  
55  
56  
57  
58



1  
2  
3 59 **Article Summary**  
4

5 60 *Strengths and limitations of this study*  
6

- 7 61 • Cross sectional analysis of the use of expedited approval pathways by Health Canada  
8  
9 62 over an extended period of time.  
10  
11 63 • Comparison of use of expedited approval pathways to independent assessment of  
12  
13 64 therapeutic evaluation.  
14  
15 65 • Analysis of approvals and therapeutic value of therapeutic subgroups.  
16  
17  
18 66 • Twenty percent of new drugs approved did not have therapeutic evaluations.  
19

20 67  
21  
22  
23  
24  
25  
26  
27  
28  
29  
30  
31  
32  
33  
34  
35  
36  
37  
38  
39  
40  
41  
42  
43  
44  
45  
46  
47  
48  
49  
50  
51  
52  
53  
54  
55  
56  
57  
58  
59  
60

1  
2  
3 68 • **Acknowledgements**  
4

5 69 • None  
6

7 70 • **Competing Interests**  
8

9 71 • In 2015-2017, Joel Lexchin received payment from two non-profit organizations for  
10 being a consultant on a project looking at indication-based prescribing and a second  
11 looking at which drugs should be distributed free of charge by general practitioners. In  
12 2015, he received payment from a for-profit organization for being on a panel that  
13 discussed expanding drug insurance in Canada. He is on the Foundation Board of Health  
14 Action International.  
15  
16  
17  
18  
19  
20  
21  
22

23 77 • **Funding**

24 78 • This research received no specific grant from any funding agency in the public,  
25 commercial or not-for profit sectors.  
26  
27  
28

29 80 • **Data sharing statement**

30 81 • Extra data can be accessed via the Dryad data repository at <http://datadryad.org/> with the  
31 doi: 10.5061/dryad.0bf6000  
32  
33  
34  
35

36 83 • **Contributorship statement**

37 84 • JL came up with the idea for this study, gathered and analyzed the data and wrote the  
38 manuscript.  
39  
40  
41  
42  
43  
44  
45  
46  
47  
48  
49  
50  
51  
52  
53  
54  
55  
56  
57  
58  
59  
60

1  
2  
3  
4  
5  
6  
7  
8  
9  
10  
11  
12  
13  
14  
15  
16  
17  
18  
19  
20  
21  
22  
23  
24  
25  
26  
27  
28  
29  
30  
31  
32  
33  
34  
35  
36  
37  
38  
39  
40  
41  
42  
43  
44  
45  
46  
47  
48  
49  
50  
51  
52  
53  
54  
55  
56  
57  
58  
59  
60

## 86 **Introduction**

87 In order to obtain authorization to market a new active substance (NAS - a molecule never  
88 marketed before in Canada in any form) in Canada, companies typically file a New Drug  
89 Submission (NDS) which includes preclinical and clinical scientific information about the  
90 product's safety, efficacy and quality and information about its claimed therapeutic value,  
91 conditions for use and side effects <sup>1</sup>. Health Canada then has a 300-day period to evaluate this  
92 information and make a decision about whether to allow the product to be sold, i.e., whether  
93 to issue a Notice of Compliance (NOC).

94

95 In an effort to ensure that promising therapies for serious, life-threatening or debilitating  
96 illnesses reach Canadians in a timely manner, Health Canada has developed two other  
97 pathways for approving NAS. These are described in detail elsewhere <sup>2</sup>, but briefly, the first  
98 of these is a priority review that involves the company submitting a complete NDS but with a  
99 review period of 180 days <sup>3</sup>. The second is the Notice of Compliance with conditions  
100 (NOC/c) <sup>4</sup> whereby Health Canada will give a conditional approval based on limited evidence  
101 – Phase II clinical trials or trials with only surrogate markers. In return for NOC/c status,  
102 companies commit to further studies that definitively establish efficacy and submit the results  
103 of these to Health Canada. A failure to complete these studies or negative results from them  
104 could lead to the marketing authorization being cancelled.

105

106 Lexchin has examined how closely Health Canada's use of the two pathways (priority review  
107 and NOC/c, hereafter collectively termed expedited review pathways) corresponds to  
108 independent assessments of the therapeutic innovation of drugs at the level of individual  
109 drugs. For the period 1997-2012, the Kappa value was 0.334 (95% CI 0.220, 0.447) or fair <sup>5</sup>.

110

1  
2  
3 111 This current study is a further and more detailed look at how Health Canada uses its  
4  
5 112 expedited review pathways, by extending previous work in a number of ways. First it covers  
6  
7 113 a wider time period – 1995 to 2016, inclusive. Second, it looks at the use of both of the  
8  
9 114 expedited review pathways over this entire time period for the entire sample of drugs as well  
10  
11 115 as subgroups – small molecule drugs, biologics, and therapies for serious diseases. Third, it  
12  
13 116 calculates the Kappa values for the entire sample of drugs as well as the subgroups listed  
14  
15 117 above. These subgroups were chosen because small molecules and biologics have  
16  
17 118 fundamentally different characteristics and these may influence a decision to use an  
18  
19 119 expedited review pathway and how accurately Health Canada can predict their therapeutic  
20  
21 120 value. Similarly, when the treatment is for serious medical conditions, Health Canada may be  
22  
23 121 more willing to use an expedited review pathway and may be more likely to believe that the  
24  
25 122 new product will provide a significant therapeutic benefit.  
26  
27  
28  
29  
30

## 31 124 **Methods**

### 32 125 *Data sources*

33 126 All NAS approved from 1995 to 2016 inclusive were documented using the annual reports  
34  
35 127 from the Therapeutic Products and the Biologics and Genetic Therapies Directorates that are  
36  
37 128 in charge of reviewing applications for new small molecule drugs and biologics and vaccines,  
38  
39 129 respectively. (Reports are available by directly contacting the directorates at  
40  
41 130 [publications@hc-sc.gc.ca](mailto:publications@hc-sc.gc.ca).) A starting year of 1995 was selected as there are no annual  
42  
43 131 reports from Health Canada prior to that year. Generic and brand names along with the  
44  
45 132 specific approval pathway – standard, priority, NOC/c (only from 1998 onwards) – and  
46  
47 133 whether the product was a small molecule drug or biologic (information available only from  
48  
49 134 2000 onwards) were manually extracted from the annual reports by the author.  
50  
51  
52  
53  
54  
55  
56  
57  
58  
59  
60

1  
2  
3 135 Not all of the drugs with a NOC/c are documented in the annual reports and they were  
4  
5 136 supplemented using four additional sources: articles by Lexchin<sup>6</sup> and Law<sup>7</sup>, the Notice of  
6  
7 137 Compliance database (<http://webprod5.hc-sc.gc.ca/noc-ac/index-eng.jsp>) and the Notice of  
8  
9 138 Compliance with conditions web site ([http://www.hc-sc.gc.ca/dhp-mps/prodpharma/notices-  
10  
11 139 avis/conditions/index-eng.php](http://www.hc-sc.gc.ca/dhp-mps/prodpharma/notices-avis/conditions/index-eng.php)). Only NAS approved under a NOC/c were considered. Drugs  
12  
13 140 can receive both a priority and NOC/c review and in this case they were only counted as  
14  
15 141 receiving a priority review.  
16  
17

18 142

### 19 143 *Assessment of therapeutic innovation*

20  
21  
22 144 The therapeutic value of drugs was assessed using the ratings from the annual reports of the  
23  
24 145 Canadian Patented Medicine Prices Review Board (PMPRB) ([54  
55 159  
56  
57  
58  
59  
60](http://www.pmprb-<br/>25<br/>26 146 <u>cepmb.gc.ca/english/View.asp?x=91</u></a>) and Prescrire International, the English language<br/>27<br/>28 147 translation of the French drug bulletin La revue Prescrire<sup>8</sup>. The processes that these two<br/>29<br/>30<br/>31 148 organizations use in arriving at their decisions about therapeutic innovation have been<br/>32<br/>33 149 previously described<sup>5</sup>. For the purpose of this study, products that the PMPRB deemed<br/>34<br/>35 150 breakthrough and substantial improvement were termed “innovative” and products in other<br/>36<br/>37 151 categories were termed “not innovative” (category 3 = moderate, little or no improvement<br/>38<br/>39 152 over existing medicines prior to 2010; slight or no improvement, moderate improvement –<br/>40<br/>41 153 primary and moderate improvement – secondary from 2010 onward). Prescrire uses seven<br/>42<br/>43 154 categories to rate therapeutic innovation. The first two, bravo (major therapeutic innovation<br/>44<br/>45 155 in an area where previously no treatment was available); a real advance (important<br/>46<br/>47 156 therapeutic innovation but has limitations) were defined as a significant therapeutic<br/>48<br/>49<br/>50 157 innovation and the other Prescrire categories (except judgment reserved) were defined as no<br/>51<br/>52 158 therapeutic advance.<br/>53</p></div><div data-bbox=)

1  
2  
3 160 If both the PMPRB and Prescrire evaluated the drug and the ratings were discordant, i.e., one  
4  
5 161 said it was not innovative and one said it was, the drug was still considered innovative. Table  
6  
7 162 1 shows that there is substantial agreement among the definitions used by Health Canada, the  
8  
9 163 PMPRB and Prescrire in assessing therapeutic innovation. Ratings were current for PMPRB  
10  
11 164 as of December 31, 2016 (the annual report for 2017 was not available at the time of writing)  
12  
13 165 and for Prescrire as of February 20, 2018.

166 **Table 1: Criteria used by Health Canada in determination of priority review or Notice**  
167 **of Compliance with conditions pathway and by Human Drug Advisory Panel and**  
168 **Prescrire in determining innovation status**  
169

| <b>Health Canada – criteria for priority review and NOC/c* pathway</b>                                                                                                                                                                                                                                        | <b>Human Drug Advisory Panel of Patented Medicine Prices Review Board – criteria for breakthrough and substantial improvement</b> | <b>Prescrire – criteria for bravo and a real advance</b>                                    |
|---------------------------------------------------------------------------------------------------------------------------------------------------------------------------------------------------------------------------------------------------------------------------------------------------------------|-----------------------------------------------------------------------------------------------------------------------------------|---------------------------------------------------------------------------------------------|
| Priority review: A serious, life-threatening or severely debilitating illness or condition for which there is substantial evidence of clinical effectiveness that the drug provides: effective treatment, prevention or diagnosis of a disease or condition for which no drug is presently marketed in Canada | Breakthrough = first drug product to treat effectively a particular illness                                                       | Bravo = major therapeutic innovation in an area where previously no treatment was available |
| NOC/c pathway: Provides patients suffering from serious, life threatening or severely debilitating diseases or conditions with earlier access to promising new drugs                                                                                                                                          | Substantial improvement = provides a substantial improvement over existing drug products                                          | A real advance = product is an important therapeutic innovation but has certain limitations |

170  
171 Adapted from: <sup>9</sup>  
172 \*Notice of Compliance with conditions  
173

174 *Data analysis*

175 The number and percent of drugs approved through the standard, priority and NOC/c

176 pathways were calculated for each year and for the 22-year period.

177

178 Kappa values were used to compare the review status from Health Canada to the assessments

179 for the same drug from the PMPRB and/or Prescrire for each year and for the 22-year period.

180 Drugs approved through the priority review and NOC/c pathways were analyzed together as a

181 single group. Kappa scores measure whether there is more or less agreement between

182 different evaluations than would be expected by chance. Levels of agreement were graded in

183 accordance with the recommendations of Landis and Koch where  $< 0$  indicates no agreement,

184  $0 - 0.20$  slight agreement,  $0.21 - 0.40$  fair agreement,  $0.41 - 0.60$  moderate agreement,  $0.61 -$

185  $0.80$  substantial agreement, and  $0.81 - 1.0$  almost perfect agreement<sup>10</sup>.

186

### 187 *Subgroup analyses*

188 The number and percent of small molecule drugs and biologics approved through the

189 standard, priority and NOC/c pathways were calculated and compared using the Chi-square

190 statistic. Similarly, the Kappa values were calculated separately for small molecule drugs and

191 biologics.

192

193 All drugs were categorized using the second level of the World Health Organization (WHO)

194 Anatomical Therapeutic Chemical (ATC) classification system<sup>11</sup>. Drugs in three therapeutic

195 groups – antineoplastic agents (L01), antivirals for systemic use (J05) and immunosuppressants

196 (L04) – were chosen for subgroup analyses because they are primarily used for serious, life-

197 threatening diseases and because there are sufficient numbers in each group to allow for

198 statistical analyses. The number and percent of each subgroup that received an expedited

199 review was calculated and the review status and therapeutic ratings were compared for each

200 drug in each of the subgroups including “all other therapeutic groups” and Kappa values were

201 calculated for each subgroup. Distribution of approval pathways in the subgroups individually

202 and for the three subgroups combined versus all other therapeutic groups was compared using  
 203 the Chi-square statistic. Calculations were done using Excel 2016 for Macintosh (Microsoft)  
 204 and Prism 7.0 (GraphPad Software).

205

#### 206 *Patient and public involvement*

207 No patients were involved in any aspect of this study.

208

#### 209 *Ethics*

210 No patients were involved in this study and only publicly available data was gathered.

211 Therefore, ethics approval was not required.

212

### 213 **Results**

#### 214 *Review status*

215 From January 1, 1995 to December 31, 2016 Health Canada approved a total of 623 NAS. Of  
 216 these, 438 (70.3%) went through the standard pathway, 152 (24.4%) the priority pathway and  
 217 33 (5.3%) received a NOC/c. Almost 30 percent (29.7%) went through the expedited review  
 218 pathways over the entire period, varying from a low of 9.1% in 2010 to a high of 47.8% in  
 219 2006 (Table 2). (Health Canada used both a priority and NOC/c approval for 11 drugs, data  
 220 not shown.) Visual inspection of Figure 1 shows that there is no trend to using expedited  
 221 review pathways more liberally or more conservatively over the time period. (Supplementary  
 222 Tables 1 & 2, drugs with and without therapeutic evaluations, respectively, give all of the  
 223 data extracted for the 623 drugs in question.)

224

225 **Table 2: Review status of new active substances approved 1995-2016**

226

| Year | Number of new active | Number (%) with standard | Number (%) with | Number (%) with NOC/c* | Number (%) with any |
|------|----------------------|--------------------------|-----------------|------------------------|---------------------|
|------|----------------------|--------------------------|-----------------|------------------------|---------------------|



|              | substances approved | review     | priority review | review   | expedited pathway review |
|--------------|---------------------|------------|-----------------|----------|--------------------------|
| 1995         | 30                  | 26 (86.7)  | 4 (13.3)        | --       | 4 (13.3)                 |
| 1996         | 33                  | 24 (72.7)  | 9 (27.3)        | --       | 9 (27.3)                 |
| 1997         | 42                  | 34 (81.0)  | 8 (19.0)        | --       | 8 (19.0)                 |
| 1998         | 30                  | 26 (86.7)  | 2 (6.7)         | 2 (6.7)  | 4 (13.3)                 |
| 1999         | 36                  | 24 (66.7)  | 12 (33.3)       | 0 (0)    | 12 (33.3)                |
| 2000         | 26                  | 15 (57.7)  | 11 (42.3)       | 0 (0)    | 11 (42.3)                |
| 2001         | 27                  | 17 (63.0)  | 9 (33.3)        | 1 (3.7)  | 10 (37.0)                |
| 2002         | 24                  | 20 (83.3)  | 4 (16.7)        | 0 (0)    | 4 (16.7)                 |
| 2003         | 20                  | 12 (60.0)  | 8 (40.0)        | 0 (0)    | 8 (40.0)                 |
| 2004         | 29                  | 19 (65.5)  | 9 (31.0)        | 1 (3.4)  | 10 (34.5)                |
| 2005         | 24                  | 13 (54.2)  | 10 (41.7)       | 1 (4.2)  | 11 (45.8)                |
| 2006         | 23                  | 12 (52.2)  | 9 (39.1)        | 2 (8.7)  | 11 (47.8)                |
| 2007         | 24                  | 14 (58.3)  | 7 (29.2)        | 3 (12.5) | 10 (41.7)                |
| 2008         | 17                  | 11 (64.7)  | 2 (11.8)        | 4 (23.5) | 6 (35.3)                 |
| 2009         | 27                  | 21 (77.8)  | 6 (22.2)        | 0 (0)    | 6 (22.2)                 |
| 2010         | 22                  | 20 (90.9)  | 2 (9.1)         | 0 (0)    | 2 (9.1)                  |
| 2011         | 27                  | 21 (77.8)  | 6 (22.2)        | 0 (0)    | 6 (22.2)                 |
| 2012         | 23                  | 16 (69.6)  | 5 (21.7)        | 2 (8.7)  | 7 (30.4)                 |
| 2013         | 39                  | 28 (71.8)  | 9 (23.1)        | 2 (5.1)  | 11 (28.2)                |
| 2014         | 25                  | 18 (72.0)  | 6 (24.0)        | 1 (4.0)  | 7 (28.0)                 |
| 2015         | 37                  | 25 (67.6)  | 5 (13.5)        | 7 (18.9) | 12 (32.4)                |
| 2016         | 38                  | 21 (55.3)  | 10 (26.3)       | 7 (18.4) | 17 (44.7)                |
| <b>Total</b> | 623                 | 438 (70.3) | 152 (24.4)      | 33 (5.3) | 185 (29.7)               |

227

228 \*Notice of Compliance with conditions

229 †Patented Medicine Prices Review Board

230

231 There were 126 biologics approved versus 323 small molecules (data only available from  
 232 2000 onward). There was no difference in the distribution of the approval pathways ( $p =$   
 233 0.4867) (Table 3). There were 81 approvals for antineoplastic agents, 47 for antivirals for  
 234 systemic use, 36 for immunosuppressants and 365 for drugs in the remaining 68 categories  
 235 (“all other 68 therapeutic groups”) (Supplementary Table 1). The distribution of approval  
 236 pathways was significantly different for the three subgroups ( $p = 0.0018$ ) and for the three  
 237 subgroups combined versus “all other therapeutic groups” ( $p < 0.00001$ ) (Table 3).

238 **Table 3: Subgroup comparison of review pathways**

239

| Subgroup                        | Standard | Priority | Notice of compliance with conditions | Total |
|---------------------------------|----------|----------|--------------------------------------|-------|
| Small molecules                 | 129      | 72       | 22                                   | 323   |
| Biologics                       | 73       | 45       | 8                                    | 126   |
| Antineoplastic agents           | 34       | 26       | 21                                   | 81    |
| Antivirals for systemic use     | 16       | 26       | 5                                    | 47    |
| Immunosuppressants              | 22       | 13       | 1                                    | 36    |
| All other 68 therapeutic groups | 365      | 89       | 5                                    | 459   |

240

241 Small molecules vs. biologics: chi-square = 1.4402 (p = 0.4867)

242 Antineoplastics vs. antivirals vs. immunosuppressants: chi-square = 17.1978 (p = 0.0018)

243 Antineoplastics + antivirals + immunosuppressants vs. all other therapeutic groups: chi-square = 97.4874 (p &lt; 0.00001)

244

245

246 *Therapeutic value*

247

248 Out of the 623 NAS, 509 (81.7%) were evaluated for their therapeutic innovation either by

249

250 the PMPRB and/or Prescrire. Health Canada used an expedited review pathway for 159 of the

251

252 509 drugs whereas only 55 were judged to be therapeutically innovative by one or both of the

253

254 independent reviews. Forty-two of the 55 drugs that were therapeutic innovations received an

255

256 expedited review, 13 received a standard review and 117 (159 – 42) that were not therapeutic

257

258 innovations also received an expedited review (Table 4). The Kappa value for the entire

259

260 period for all 509 drugs was 0.276 (95% CI 0.194, 0.359) or fair. Figure 2 presents the Kappa

261

262 values for each year which generally ranged from 0 (slight) to 0.4 (fair).

263

264

265

266

267 **Table 4: Number of new active substances with an expedited review and therapeutically innovative rating**

268

269

| Year | Number (%) of NAS* with a therapeutic assessment from | Number of NAS with an expedited review | Number of NAS rated as therapeutic innovation by | Number of therapeutically innovative NAS with an |
|------|-------------------------------------------------------|----------------------------------------|--------------------------------------------------|--------------------------------------------------|
|      |                                                       |                                        |                                                  |                                                  |

270

271

272

273

274

275

|               | Patented<br>Medicine Prices<br>Review Board<br>and/or Prescribe |     | either Patented<br>Medicine Prices<br>Review Board<br>and/or Prescribe | expedited<br>review |
|---------------|-----------------------------------------------------------------|-----|------------------------------------------------------------------------|---------------------|
| 1995          | 22 (73.3)                                                       | 3   | 1                                                                      | 0                   |
| 1996          | 20 (60.6)                                                       | 5   | 4                                                                      | 3                   |
| 1997          | 24 (57.1)                                                       | 4   | 4                                                                      | 2                   |
| 1998          | 24 (80.0)                                                       | 4   | 1                                                                      | 0                   |
| 1999          | 31 (86.1)                                                       | 10  | 1                                                                      | 0                   |
| 2000          | 20 (76.9)                                                       | 9   | 4                                                                      | 4                   |
| 2001          | 23 (85.2)                                                       | 8   | 1                                                                      | 1                   |
| 2002          | 20 (83.3)                                                       | 4   | 0                                                                      | 0                   |
| 2003          | 19 (95.0)                                                       | 8   | 2                                                                      | 2                   |
| 2004          | 26 (89.7)                                                       | 9   | 3                                                                      | 3                   |
| 2005          | 21 (87.5)                                                       | 9   | 3                                                                      | 2                   |
| 2006          | 21 (91.3)                                                       | 9   | 3                                                                      | 2                   |
| 2007          | 22 (91.7)                                                       | 9   | 3                                                                      | 3                   |
| 2008          | 15 (88.2)                                                       | 6   | 2                                                                      | 2                   |
| 2009          | 26 (96.3)                                                       | 7   | 0                                                                      | 0                   |
| 2010          | 19 (86.4)                                                       | 2   | 2                                                                      | 2                   |
| 2011          | 23 (85.3)                                                       | 5   | 2                                                                      | 2                   |
| 2012          | 21 (91.3)                                                       | 6   | 3                                                                      | 2                   |
| 2013          | 36 (92.3)                                                       | 11  | 6                                                                      | 3                   |
| 2014          | 22 (88.0)                                                       | 6   | 3                                                                      | 2                   |
| 2015          | 30 (81.1)                                                       | 12  | 4                                                                      | 4                   |
| 2016          | 24 (63.2)                                                       | 13  | 3                                                                      | 3                   |
| 1995-<br>2016 | 509 (81.7)                                                      | 159 | 55                                                                     | 42                  |

260

261 \*New active substance

262 †Number of drugs rated as innovative as a percent of all drugs given an expedited approval  
263 review by Health Canada264 ‡Number of drugs rated as not therapeutically innovative as a percent of all drugs given a  
265 standard review by Health Canada

266

267 There were 286 and 99 small molecule drugs and biologics, respectively, with therapeutic  
268 ratings. The Kappa values were 0.313 (95% CI 0.205, 0.420) (fair) and 0.233 (95% CI 0.061,  
269 0.405) (fair), respectively. The overlapping 95% CIs indicate no difference in the Kappa  
270 values between the two groups (Table 5).

271 **Table 5: Subgroup analyses: Kappa values**

272

| Subgroup       | Number<br>(%) | Kappa value<br>(95% CI) |
|----------------|---------------|-------------------------|
| Small molecule | 286           | 0.313 (0.205,           |

|                              |     |                      |
|------------------------------|-----|----------------------|
| drugs                        |     | 0.420)               |
| Biologics                    | 99  | 0.233 (0.061, 0.405) |
| Antineoplastic agents        | 71  | 0.091 (0.017, 0.200) |
| Antivirals for systemic use  | 46  | 0.122 (0.011, 0.233) |
| Immunosuppressants           | 35  | 0.376 (0.075, 0.675) |
| All other therapeutic groups | 357 | 0.385 (0.263, 0.506) |

273

274 The 509 drugs were in 58 different second level ATC groups (drugs in 13 ATC groups did  
 275 not have therapeutic evaluations): antineoplastic agents (71), antivirals for systemic use (46),  
 276 immunosuppressants (35) and “all other therapeutic groups” (357) (Supplementary Table 1).  
 277 Kappa values for the four groups were: 0.091 (95% CI 0.017, 0.200) (slight), 0.200), 0.122  
 278 (95% CI 0.011, 0.233) (slight)), 0.376 (95% CI 0.075, 0.675) (fair) and 0.385 (95% CI 0.263,  
 279 0.506) (fair), respectively. The 95% CIs for the Kappa values for the antineoplastic agents,  
 280 antivirals for systemic use and immunosuppressants overlapped indicating no difference  
 281 among the groups and the 95% CI for the immunosuppressants overlapped with the 95% CI  
 282 for “all other therapeutic groups”. Drugs in the three therapeutic subgroups were much less  
 283 likely to receive a standard review than were drugs in “all other therapeutic groups”, 43.7%  
 284 versus 79.1% (data not shown).

285

## 286 Discussion

287 Almost 30% of the 623 new active substances that Health Canada reviewed between 1995  
 288 and 2016 went through at least one of two expedited review pathways – priority review or  
 289 NOC/c, primarily a priority review. There is no difference between small molecule drugs and  
 290 biologics in the approval pathways used indicating that for these two groups Health Canada  
 291 does not see one or the other being more likely to offer significant new therapeutic benefits.  
 292 However, the same is not true for the therapeutic subgroups. Drugs in the three specifically

1  
2  
3 293 examined – antineoplastics, antivirals and immunosuppressants – were collectively more  
4  
5 294 likely to be assigned to an expedited review pathway (56%) compared to drugs in “all other  
6  
7 295 therapeutic groups” (20.9%), possibly because of the nature of the diseases that they treat.  
8

9 296

10  
11 297 Just over 80% of the NAS approved had been assessed by the PMPRB and/or Prescrire for  
12  
13 298 their therapeutic benefit. The Kappa value for the 509 drugs was 0.276 meaning that Health  
14  
15 299 Canada’s ability to predict major therapeutic gain from these drugs was only fair.

16  
17 300 Furthermore, almost 25% (13/55) of the drugs that were therapeutic innovations did not  
18  
19 301 receive an expedited review underscoring that Health Canada is not reliably able to predict  
20  
21 302 which drugs will offer major therapeutic gains. The relatively low Kappa value may relate to  
22  
23 303 when Health Canada makes its decision about what type of approval pathway to use. This  
24  
25 304 assignment is at the start of the review process when all of the data will not have been fully  
26  
27 305 assessed. In contrast, the PMPRB and Prescrire make their assessments after the drug has  
28  
29 306 been marketed when more information about efficacy and safety is available.  
30  
31

32  
33 307

34  
35 308 As was the case with the assignment of an expedited review pathway, there is no difference  
36  
37 309 in how accurately Health Canada predicts the therapeutic value of small molecule drugs and  
38  
39 310 biologics as measured by Kappa values. The Kappa value for drugs in “all other therapeutic  
40  
41 311 groups” is higher than the value for drugs in the antineoplastic, antiviral and  
42  
43 312 immunosuppressant groups. This difference may be because Health Canada is better able to  
44  
45 313 predict that these drugs are less likely to be therapeutic innovations than drugs in the  
46  
47 314 antineoplastic, antiviral and immunosuppressant groups. Out of the 357 drugs that had  
48  
49 315 therapeutic evaluations in the “all other therapeutic groups,” 79.3% received a standard  
50  
51 316 review compared to 43.7% of the 151 drugs in the three therapeutic subgroups.  
52  
53

54  
55 317  
56  
57  
58  
59

1  
2  
3 318 How Health Canada uses its expedited review pathways is important for a number of reasons.  
4  
5 319 First, their use may explicitly create an impression among clinicians and patients that these  
6  
7 320 drugs are likely to deliver major new therapeutic benefits despite the fact that the likelihood  
8  
9 321 that they will is only “fair” as measured by the Kappa value. Second, the NOC/c pathway  
10  
11 322 requires companies to commit to conducting post-market studies to validate the efficacy of  
12  
13 323 the product, but many of these studies are delayed<sup>6,7</sup>, leaving clinicians and patients  
14  
15 324 uncertain about the value of these products. In at least one case, Health Canada did not  
16  
17 325 suspend the sale of a drug and allowed it to stay on the market despite not fulfilling the  
18  
19 326 conditions required under its NOC/c. In December 2003, Iressa (gefitinib) was approved as a  
20  
21 327 third-line treatment for non-small cell lung cancer on the condition that the company submit a  
22  
23 328 study showing that it improved survival<sup>12</sup>. When the study results were submitted to Health  
24  
25 329 Canada they showed no survival benefit for gefitinib compared to placebo<sup>13</sup>. Health Canada  
26  
27 330 recognized that the conditions had not been fulfilled, but rather than removing gefitinib from  
28  
29 331 the market, in February 2005 it elected to allow it to continue to be sold<sup>12</sup>. In 2009, the drug  
30  
31 332 was deemed to have met its conditions after a new study showed non-inferiority, i.e., survival  
32  
33 333 after taking it was no worse compared to another chemotherapeutic agent<sup>14</sup>. Third, although  
34  
35 334 the priority and standard approval pathways are equivalent in terms of the amount of data  
36  
37 335 reviewed, the former is done in 180 days compared to 300 days for the latter, meaning that  
38  
39 336 the priority pathway is more resource intensive possibly drawing resources from other Health  
40  
41 337 Canada activities. Finally, drugs reviewed through both expedited review pathways are more  
42  
43 338 likely to receive safety warnings once they are on the market compared to drugs with a  
44  
45 339 standard approval<sup>2,15</sup>.

50 340

51  
52 341 As Figure 1 indicates, Health Canada is not using the expedited review pathways more  
53  
54 342 liberally (or more conservatively) over time, but as Figure 2 shows it has not improved its

1  
2  
3 343 ability to predict therapeutic innovation over the 22 years evaluated in this study. The  
4  
5 344 Introduction describes the criteria that Health Canada uses to assign a drug to either a priority  
6  
7 345 review or a NOC/c review but how those criteria are applied and whether Health Canada  
8  
9 346 periodically reviews its performance are not known.

10  
11 347

12  
13 348 Contrary to the situation in the United States (US) where the Food and Drug Administration  
14  
15 349 (FDA) has been using an increasing number of expedited development or review programs,  
16  
17 350 Health Canada's use of its programs has been relatively stable since 1995. Between 1987 and  
18  
19 351 2014, 43% received a priority review from the FDA and 19% were approved through the fast  
20  
21 352 track program which approximately corresponds to a NOC/c<sup>16</sup>. (Drugs could be associated  
22  
23 353 with both programs.) However, when it comes to approving oncology drugs through an  
24  
25 354 expedited pathway, Health Canada is only marginally better than the FDA. In the US, only 1  
26  
27 355 of 15 (6.7%) oncology drugs approved through an expedited program from January 1, 2008,  
28  
29 356 through December 31, 2012 had a proven survival benefit compared to the other 6 and 8 that  
30  
31 357 either had no overall survival benefit or an unknown benefit, respectively<sup>17</sup>. In this current  
32  
33 358 study, out of 42 antineoplastic agents that Health Canada gave an expedited review, only 6  
34  
35 359 (14.3%) were rated as therapeutically innovative. The accelerated assessment (AA) process  
36  
37 360 and the conditional approvals pathway used by the European Medicines Agency (EMA) are  
38  
39 361 roughly the equivalent of Health Canada's priority review and NOC/c pathway<sup>18</sup>. The EMA  
40  
41 362 used the former for 15.5% (23/148) of new drugs between 2012 and 2016<sup>19,20</sup>, while the  
42  
43 363 latter was used for 10.1% (30/296) of new drugs between 2006 and 2016<sup>20,21</sup>. In the same  
44  
45 364 time periods, Health Canada used a priority approval 21.6% (35/162) of the time and its  
46  
47 365 NOC/c pathway 9.1% (28/308) of the time.

48  
49 366

50  
51 367

1  
2  
3 368 *Limitations*

4  
5 369 Almost 20% of new drugs approved by Health Canada were not evaluated for their  
6  
7 370 therapeutic innovation by either the PMPRB or La revue Prescrire. The absence of these  
8  
9 371 evaluations may have skewed the Kappa values in either a more positive or more negative  
10  
11 372 direction. The lack of the availability of reports from Health Canada reviewers means that the  
12  
13 373 reasons why drugs were assigned to a specific review pathway cannot be evaluated.  
14

15  
16 374

17  
18 375 **Conclusion**

19  
20 376 Health Canada continues to use expedited review pathways for about 30% of new drugs.  
21  
22 377 Other regulatory authorities such as the Australian Therapeutic Goods Administration and the  
23  
24 378 EMA are in the process of either implementing or expanding expedited review pathways<sup>22-24</sup>  
25  
26 379 and should study the example of what has happened in Canada. The rationale for using  
27  
28 380 expedited review pathways is to get important therapeutic advances to patients in a timely  
29  
30 381 manner, but Health Canada's ability to predict which of these drugs will fulfill this  
31  
32 382 expectation has not improved over a 22-year period and remains relatively low. Moreover,  
33  
34 383 use of these pathways comes with both health related and resource costs. The findings in this  
35  
36 384 study should provoke a discussion about whether Health Canada should continue to use these  
37  
38 385 pathways and if so how their use can be improved.  
39  
40  
41  
42  
43  
44  
45  
46  
47  
48  
49  
50  
51  
52  
53  
54  
55  
56  
57  
58  
59  
60



1  
2  
3 386 **Figure 1 legend**  
4

5 387 Grey – Percent with Notice of Compliance with conditions

6 388

7 389 Orange – Percent with priority

8 390

9 391 Blue – Percent with standard

10 392

11  
12 393 **Figure 2 legend**  
13

14 394 Kappa values:

15  
16 395 < 0 = no agreement

17 396

18 397 0 – 0.20 = slight agreement

19 398

20 399 0.21 – 0.40 = fair agreement

21 400

22 401 0.41 – 0.60 = moderate agreement

23 402

24 403 0.61 – 0.80 = substantial agreement

25 404

26 405 0.81 – 1.0 = almost perfect agreement

27 406

28  
29 407  
30  
31  
32  
33  
34  
35  
36  
37  
38  
39  
40  
41  
42  
43  
44  
45  
46  
47  
48  
49  
50  
51  
52  
53  
54  
55  
56  
57  
58  
59  
60

408 **References**

- 409 1. Health Products and Food Branch. Access to therapeutic products: the regulatory  
410 process in Canada. Secondary Access to therapeutic products: the regulatory  
411 process in Canada 2006.  
412 [http://publications.gc.ca/collections/collection\\_2007/hc-sc/H164-9-2006E.pdf](http://publications.gc.ca/collections/collection_2007/hc-sc/H164-9-2006E.pdf).
- 413 2. Lexchin J. Post-market safety warnings for drugs approved in Canada under the  
414 Notice of Compliance with conditions policy. *British Journal of Clinical  
415 Pharmacology* 2015;**79**:847-59.
- 416 3. Health Canada: Health Products and Food Branch. Guidance for industry: priority  
417 review of drug submissions. Ottawa, 2009.
- 418 4. Health Canada. Notice of compliance with conditions (NOC/c). Ottawa, 2002.
- 419 5. Lexchin J. Health Canada's use of its priority review process for new drugs: a cohort  
420 study. *BMJ Open* 2015;**5**:e006816.
- 421 6. Lexchin J. Notice of compliance with conditions: a policy in limbo. *Healthcare Policy*  
422 2007;**2**:114-22.
- 423 7. Law M. The characteristics and fulfillment of conditional prescription drug approvals  
424 in Canada. *Health Policy* 2014;**116**:154-61.
- 425 8. Prescrire Editorial Staff. Prescrire's ratings system: gauge the usefulness of new  
426 products at a glance. Secondary Prescrire's ratings system: gauge the usefulness  
427 of new products at a glance 2011.  
428 <http://english.prescrire.org/en/81/168/46800/0/NewsDetails.aspx>.
- 429 9. Lexchin J. Postmarket safety in Canada: are significant therapeutic advances and  
430 biologics less safe than other drugs? A cohort study. *BMJ Open* 2014;**4**:e004289.
- 431 10. Landis JR, Koch GG. The measurement of observer agreement for categorical data.  
432 *Biometrics* 1977;**33**:159-74.
- 433 11. WHO Collaborating Centre for Drug Statistics Methodology, Norwegian Institute of  
434 Public Health. Structure and principles. Secondary Structure and principles  
435 2011. [http://www.whocc.no/atc/structure\\_and\\_principles/](http://www.whocc.no/atc/structure_and_principles/).
- 436 12. Health Canada. Clarification from Health Canada regarding the status of Iressa®  
437 (gefitinib) in Canada. Secondary Clarification from Health Canada regarding the  
438 status of Iressa® (gefitinib) in Canada 2005. [http://www.hc-sc.gc.ca/dhp-mps/prodpharma/activit/fs-fi/fact\\_iressa-eng.php](http://www.hc-sc.gc.ca/dhp-mps/prodpharma/activit/fs-fi/fact_iressa-eng.php).
- 439 13. Thatcher N, Chang A, Parikh P, et al. Gefitinib plus best supportive care in previous  
440 treated patients with refractory advanced non-small-cell lung cancer: results  
441 from a randomised, placebo-controlled, multicentre study (Iressa Survival  
442 Evaluation in Lung Cancer). *Lancet* 2005;**366**:1527-37.
- 443 14. Kim E, Hirsh V, Mok T, et al. Gefitinib versus docetaxel in previously treated non-  
444 small-cell lung cancer (INTEREST): a randomised phase III trial. *Lancet*  
445 2008;**372**:1809-18.
- 446 15. Lexchin J. New drugs and safety: what happened to new active substances approved  
447 in Canada between 1995 and 2010? *Archives of Internal Medicine*  
448 2012;**172**:1680-81.
- 449 16. Kesselheim A, Wang B, Franklin J, et al. Trends in utilization of FDA expedited drug  
450 development and approval programs, 1987-2014: cohort study. *BMJ*  
451 2015;**351**:h4633.
- 452 17. Kim C, Prasad V. Cancer drugs approved on the basis of a surrogate end point and  
453 subsequent overall survival: an analysis of 5 years of US Food and Drug  
454 Administration approvals. *JAMA Internal Medicine* 2015;**175**:1992-94.
- 455

- 1  
2  
3 456 18. Baird L, Banken R, Eicher H-G, et al. Accelerated access to innovative medicines for  
4 457 patients in need. *Clinical Pharmacology & Therapeutics* 2014;**96**:559-72.  
5 458 19. European Medicines Agency. Accelerated assessment (AA): review of 10 months  
6 459 experience with the new AA process. Secondary Accelerated assessment (AA):  
7 460 review of 10 months experience with the new AA process 2018.  
8 461 [http://www.ema.europa.eu/docs/en\\_GB/document\\_library/Presentation/2018](http://www.ema.europa.eu/docs/en_GB/document_library/Presentation/2018/01/WC500241575.pdf)  
9 462 [/01/WC500241575.pdf](http://www.ema.europa.eu/docs/en_GB/document_library/Presentation/2018/01/WC500241575.pdf).  
10 463 20. Centre for Innovation in Regulatory Science. New drug approvals in six major  
11 464 authorities 2007-2016: focus on the internationalisation of medicines. London,  
12 465 2017.  
13 466 21. European Medicines Agency. Conditional marketing authorisation: report on ten  
14 467 years of experience at the European Medicines Agency. London, 2017.  
15 468 22. European Medicines Agency. Final report on the adaptive pathways pilot. London,  
16 469 2016.  
17 470 23. Department of Health Therapeutic Goods Administration. Consultation: provisional  
18 471 approval pathway for prescription medicines. Proposed registration process and  
19 472 post-market requirements. Woden, ACT, 2017.  
20 473 24. Department of Health Therapeutic Goods Administration. Consultation: expedited  
21 474 pathways for prescription medicines. Eligibility criteria and designation process.  
22 475 Woden, ACT, 2016.  
23 476  
24  
25  
26  
27  
28  
29  
30  
31  
32  
33  
34  
35  
36  
37  
38  
39  
40  
41  
42  
43  
44  
45  
46  
47  
48  
49  
50  
51  
52  
53  
54  
55  
56  
57  
58  
59  
60

1  
2  
3  
4  
5  
6  
7  
8  
9  
10  
11  
12  
13  
14  
15  
16  
17  
18  
19  
20  
21  
22  
23  
24  
25  
26  
27  
28  
29  
30  
31  
32  
33  
34  
35  
36  
37  
38  
39  
40  
41  
42  
43  
44  
45  
46  
47  
48  
49  
50  
51  
52  
53  
54  
55  
56  
57  
58  
59  
60

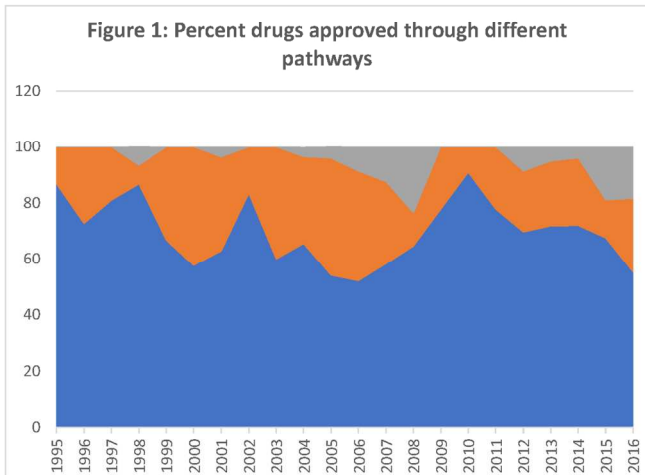

148x209mm (300 x 300 DPI)

1  
2  
3  
4  
5  
6  
7  
8  
9  
10  
11  
12  
13  
14  
15  
16  
17  
18  
19  
20  
21  
22  
23  
24  
25  
26  
27  
28  
29  
30  
31  
32  
33  
34  
35  
36  
37  
38  
39  
40  
41  
42  
43  
44  
45  
46  
47  
48  
49  
50  
51  
52  
53  
54  
55  
56  
57  
58  
59  
60



148x209mm (300 x 300 DPI)

**Supplementary Table 1: All drugs approved between 1995-2016 that received therapeutic assessments from Patented Medicine Prices Review Board and/or La revue Prescrire\***

| Generic name     | Brand name                 | PMPRB<br>breakthrough,<br>substantial<br>improvement<br>and/or<br>Prescrire<br>bravo, a real<br>advance | PMPRB<br>and/or<br>Prescrire no<br>significant<br>therapeutic<br>innovation† | Review status<br>Standard<br>Priority | Notice of<br>compliance<br>with<br>conditions | Notice of<br>compliance<br>or notice of<br>compliance<br>with<br>conditions<br>date | Small<br>molecule | Biologic | ATC group (second<br>level)              |
|------------------|----------------------------|---------------------------------------------------------------------------------------------------------|------------------------------------------------------------------------------|---------------------------------------|-----------------------------------------------|-------------------------------------------------------------------------------------|-------------------|----------|------------------------------------------|
| Adapalene        | Differin                   |                                                                                                         | 1                                                                            | 1                                     |                                               | 1995-01-24                                                                          |                   |          | anti-acne preparation                    |
| Dexrazoxane      | Zinocard                   | 1                                                                                                       |                                                                              | 1                                     |                                               | 1995-02-07                                                                          |                   |          | all other therapeutic<br>products        |
| Bambuterol       | Bambec                     |                                                                                                         | 1                                                                            | 1                                     |                                               | 1995-02-07                                                                          |                   |          | drugs for obstructive<br>airway diseases |
| Naltrexone       | Revia                      |                                                                                                         | 1                                                                            | 1                                     |                                               | 1995-03-23                                                                          |                   |          | other nervous system<br>drugs            |
| Cefprozil        | Cefzil                     |                                                                                                         | 1                                                                            | 1                                     |                                               | 1995-03-29                                                                          |                   |          | antibacterials for                       |
| Zuclopenthixol   | Clopixol                   |                                                                                                         | 1                                                                            | 1                                     |                                               | 1995-04-24                                                                          |                   |          | psycholeptics                            |
| Zuclopenthixol   | Clopixol                   |                                                                                                         | 1                                                                            | 1                                     |                                               | 1995-04-24                                                                          |                   |          | psycholeptics                            |
| Zuclopenthixol   | acuphase<br>Clopixol depot |                                                                                                         | 1                                                                            | 1                                     |                                               | 1995-04-24                                                                          |                   |          | psycholeptics                            |
| Lansoprazole     | Prevacid                   |                                                                                                         | 1                                                                            | 1                                     |                                               | 1995-05-12                                                                          |                   |          | drugs for acid related<br>disorders      |
| Cefepime         | Maxipime                   |                                                                                                         | 1                                                                            | 1                                     |                                               | 1995-06-02                                                                          |                   |          | antibacterials for<br>systemic use       |
| Interferon Beta- | Betaseron                  |                                                                                                         | 1                                                                            |                                       | 1                                             | 1995-07-19                                                                          |                   |          | immunostimulants                         |
| Famciclovir      | Famvir                     |                                                                                                         | 1                                                                            | 1                                     |                                               | 1995-07-31                                                                          |                   |          | antivirals for systemic<br>use           |
| Cefpodoxime      | Orelox                     |                                                                                                         | 1                                                                            | 1                                     |                                               | 1995-08-22                                                                          |                   |          | antibacterials for<br>svstemic use       |
| Sevoflurane      | Sevorane                   |                                                                                                         | 1                                                                            | 1                                     |                                               | 1995-09-18                                                                          |                   |          | anesthetics                              |

|    |                   |              |   |   |            |                          |
|----|-------------------|--------------|---|---|------------|--------------------------|
| 1  |                   |              |   |   |            |                          |
| 2  |                   |              |   |   |            |                          |
| 3  | Losartan          | Cozaar       | 1 | 1 | 1995-09-28 | agents acting on the     |
| 4  |                   |              |   |   |            | renin-angiotensin system |
| 5  | Iotrolan          | Osmovist 280 | 1 | 1 | 1995-10-04 | contrast media           |
| 6  | Bicalutamide      | Casodex      | 1 | 1 | 1995-11-02 | endocrine therapy        |
| 7  | Acarbose          | Prandase     | 1 | 1 | 1995-11-15 | drugs used in diabetes   |
| 8  | Mycophenolate     | Cellcept     | 1 | 1 | 1995-11-15 | immunosuppressants       |
| 9  | Tacrolimus        | Prograf      | 1 | 1 | 1995-12-06 | immunosuppressants       |
| 10 | Lamivudine        | 3TC          | 1 | 1 | 1995-12-08 | antivirals for systemic  |
| 11 |                   |              |   |   |            | use                      |
| 12 | Alendronate       | Fosamax      | 1 | 1 | 1995-12-20 | drugs for treatment of   |
| 13 |                   |              |   |   |            | bone disease             |
| 14 | Stavudine         | Zerit        | 1 | 1 | 1996-03-26 | antivirals for systemic  |
| 15 |                   |              |   |   |            | use                      |
| 16 | Acellular         | Acel-P       | 1 | 1 | 1996-03-29 | vaccines                 |
| 17 | pertussis vaccine |              |   |   |            |                          |
| 18 | adsorbed          |              |   |   |            |                          |
| 19 |                   |              |   |   |            |                          |
| 20 | Dorzolamide       | Trusopt      | 1 | 1 | 1996-04-25 | ophthalmologicals        |
| 21 | Amifostine        | Ethyol       | 1 | 1 | 1996-04-25 | all other therapeutic    |
| 22 |                   |              |   |   |            | products                 |
| 23 | Valacyclovir      | Valtrex      | 1 | 1 | 1996-05-01 | antivirals for systemic  |
| 24 |                   |              |   |   |            | use                      |
| 25 | Quinagolide       | Norprolac    | 1 | 1 | 1996-06-25 | other gynecologicals     |
| 26 | Meropenem         | Merrem       | 1 | 1 | 1996-07-02 | antibacterials for       |
| 27 |                   |              |   |   |            | systemic use             |
| 28 | Abciximab         | Reopro       | 1 | 1 | 1996-07-04 | antithrombotic agents    |
| 29 | Anastrozole       | Arimidex     | 1 | 1 | 1996-08-01 | endocrine therapy        |
| 30 | Ritonavir         | Norvir       | 1 | 1 | 1996-08-14 | antivirals for systemic  |
| 31 |                   |              |   |   |            | use                      |
| 32 | Raltitrexed       | Tomudex      | 1 | 1 | 1996-09-12 | antineoplastic agents    |
| 33 | Indinavir         | Crixivan     | 1 | 1 | 1996-09-13 | antivirals for systemic  |
| 34 |                   |              |   |   |            | use                      |
| 35 | Insulin lispro    | Humalog      | 1 | 1 | 1996-10-08 | drugs used in diabetes   |
| 36 |                   |              |   |   |            |                          |
| 37 |                   |              |   |   |            |                          |
| 38 |                   |              |   |   |            |                          |
| 39 |                   |              |   |   |            |                          |
| 40 |                   |              |   |   |            |                          |
| 41 |                   |              |   |   |            |                          |
| 42 |                   |              |   |   |            |                          |
| 43 |                   |              |   |   |            |                          |
| 44 |                   |              |   |   |            |                          |
| 45 |                   |              |   |   |            |                          |
| 46 |                   |              |   |   |            |                          |
| 47 |                   |              |   |   |            |                          |

|    |                  |             |   |   |            |                           |
|----|------------------|-------------|---|---|------------|---------------------------|
| 1  |                  |             |   |   |            |                           |
| 2  |                  |             |   |   |            |                           |
| 3  | Dirithromycin    | Dynabac     | 1 | 1 | 1996-10-28 | antibacterials for        |
| 4  |                  |             |   |   |            | systemic use              |
| 5  | Olanzapine       | Zyprexa     | 1 | 1 | 1996-10-28 | psycholeptics             |
| 6  | Nalmefene        | Revex       | 1 | 1 | 1996-11-06 | other nervous system      |
| 7  | Zolpidem         | Ambien      | 1 | 1 | 1996-11-20 | psycholeptics             |
| 8  | Desflurane       | Suprane     | 1 | 1 | 1996-12-03 | anesthetics               |
| 9  | Gemcitabine      | Gemzar      | 1 | 1 | 1996-12-23 | antineoplastic agents     |
| 10 | Ropivacaine      | Naropin     | 1 | 1 | 1996-12-24 | anesthetics               |
| 11 |                  | injections  |   |   |            |                           |
| 12 | Imiglucerase     | Cerezyme    | 1 | 1 | 1997-02-12 | other alimentary tract    |
| 13 |                  |             |   |   |            | and metabolism products   |
| 14 | Atorvastatin     | Lipitor     | 1 | 1 | 1997-02-19 | lipid modifying agents    |
| 15 | Topiramate       | Topamax     | 1 | 1 | 1997-03-06 | antiepileptics            |
| 16 | Formoterol       | Foradil dry | 1 | 1 | 1997-03-06 | drugs for obstructive     |
| 17 |                  | powder      |   |   |            | airway diseases           |
| 18 |                  | capsules    |   |   |            |                           |
| 19 | Epoprostenol     | Flolan      | 1 | 1 | 1997-03-06 | antithrombotic agents     |
| 20 | Coagulation      | Benefix     | 1 | 1 | 1997-03-21 | antihemorrhagics          |
| 21 | factor IX        |             |   |   |            |                           |
| 22 | Topotecan        | Hycamtin    | 1 | 1 | 1997-04-15 | antineoplastic agents     |
| 23 | Dolasetron       | Anzemet     | 1 | 1 | 1997-05-21 | antiemetics and           |
| 24 |                  |             |   |   |            | antinauseants             |
| 25 | Letrozole        | Femara      | 1 | 1 | 1997-05-21 | endocrine therapy         |
| 26 | Fexofenadine     | Allegra     | 1 | 1 | 1997-06-11 | antihistamines for        |
| 27 |                  |             |   |   |            | systemic use              |
| 28 | Latanoprost      | Xalatan     | 1 | 1 | 1997-06-16 | ophthalmologicals         |
| 29 | Carbetocin       | Duratocin   | 1 | 1 | 1997-06-24 | pituitary and             |
| 30 |                  |             |   |   |            | hypothalamic hormones     |
| 31 |                  |             |   |   |            | and analogues             |
| 32 | Follitropin beta | Puregon     | 1 | 1 | 1997-07-02 | sex hormones and          |
| 33 |                  |             |   |   |            | modulators of the genital |
| 34 |                  |             |   |   |            | svstem                    |
| 35 |                  |             |   |   |            |                           |
| 36 |                  |             |   |   |            |                           |
| 37 |                  |             |   |   |            |                           |
| 38 |                  |             |   |   |            |                           |
| 39 |                  |             |   |   |            |                           |
| 40 |                  |             |   |   |            |                           |
| 41 |                  |             |   |   |            |                           |
| 42 |                  |             |   |   |            |                           |
| 43 |                  |             |   |   |            |                           |
| 44 |                  |             |   |   |            |                           |
| 45 |                  |             |   |   |            |                           |
| 46 |                  |             |   |   |            |                           |
| 47 |                  |             |   |   |            |                           |



|    |                  |               |   |   |            |                          |
|----|------------------|---------------|---|---|------------|--------------------------|
| 1  |                  |               |   |   |            |                          |
| 2  |                  |               |   |   |            |                          |
| 3  | Irinotecan       | Camptosar     | 1 | 1 | 1997-07-04 | antineoplastic agents    |
| 4  | Donepezil        | Aricept       | 1 | 1 | 1997-08-12 | psychoanaleptics         |
| 5  | Ropinirole       | Requip        |   | 1 | 1997-08-19 | anti-parkinson drugs     |
| 6  | Ibandronate      | Bondronat     |   | 1 | 1997-08-27 | drugs for treatment of   |
| 7  |                  |               |   |   |            | bone disease             |
| 8  | Glatiramer       | Copaxone for  |   | 1 | 1997-09-04 | immunostimulants         |
| 9  |                  | injection     |   |   |            |                          |
| 10 | Tolcapone        | Tasmar        |   | 1 | 1997-10-08 | anti-parkinson drugs     |
| 11 | Zafirlukast      | Accolate      |   | 1 | 1997-10-21 | drugs for obstructive    |
| 12 |                  |               |   |   |            | airway diseases          |
| 13 | Valsartan        | Diovan        |   | 1 | 1997-11-03 | agents acting on the     |
| 14 |                  |               |   |   |            | renin-angiotensin system |
| 15 |                  |               |   |   |            |                          |
| 16 | Levofloxacin     | Levaquin      |   | 1 | 1997-11-14 | antibacterials for       |
| 17 |                  |               |   |   |            | systemic use             |
| 18 | Brimonidine      | Alphagan      |   | 1 | 1997-11-24 | ophthalmologicals        |
| 19 |                  | ophthalmic    |   |   |            |                          |
| 20 | Quetiapine       | Seroquel      |   | 1 | 1997-12-02 | psycholeptics            |
| 21 | Pramipexole      | Mirapex       |   | 1 | 1998-01-29 | anti-parkinson drugs     |
| 22 | Interferon Beta- | Rebif         |   | 1 | 1998-02-05 | immunostimulants         |
| 23 | Emedastine       | Emadine       |   | 1 | 1998-02-16 | ophthalmologicals        |
| 24 |                  | ophthalmic    |   |   |            |                          |
| 25 | Cerivastatin     | Baycol        |   | 1 | 1998-02-18 | lipid modifying agents   |
| 26 | Grepafloxacin    | Raxar         |   | 1 | 1998-04-09 | antibacterials for       |
| 27 |                  |               |   |   |            | systemic use             |
| 28 | Naratriptan      | Amerge        |   | 1 | 1998-04-28 | analgesics               |
| 29 | Bupropion        | Wellbutrin SR |   | 1 | 1998-04-28 | psychoanaleptics         |
| 30 | Irbesartan       | Avapro        |   | 1 | 1998-06-01 | agents acting on the     |
| 31 |                  |               |   |   |            | renin-angiotensin system |
| 32 |                  |               |   |   |            |                          |
| 33 | Tamsulosin       | Flomax        |   | 1 | 1998-06-01 | urologicals              |
| 34 | Montelukast      | Singulair     |   | 1 | 1998-06-17 | drugs for obstructive    |
| 35 |                  |               |   |   |            | airway diseases          |
| 36 |                  |               |   |   |            |                          |
| 37 |                  |               |   |   |            |                          |
| 38 |                  |               |   |   |            |                          |
| 39 |                  |               |   |   |            |                          |
| 40 |                  |               |   |   |            |                          |
| 41 |                  |               |   |   |            |                          |
| 42 |                  |               |   |   |            |                          |
| 43 |                  |               |   |   |            |                          |
| 44 |                  |               |   |   |            |                          |
| 45 |                  |               |   |   |            |                          |
| 46 |                  |               |   |   |            |                          |
| 47 |                  |               |   |   |            |                          |

|    |                   |                  |   |   |   |            |                           |
|----|-------------------|------------------|---|---|---|------------|---------------------------|
| 1  |                   |                  |   |   |   |            |                           |
| 2  |                   |                  |   |   |   |            |                           |
| 3  | Delavirdine       | Rescriptor       | 1 | 1 | 1 | 1998-07-22 | antivirals for systemic   |
| 4  |                   |                  |   |   |   |            | use                       |
| 5  | Nelfinavir        | Viracept         | 1 |   | 1 | 1998-08-11 | antivirals for systemic   |
| 6  |                   |                  |   |   |   |            | use                       |
| 7  | Zolmitriptan      | Zomig            | 1 | 1 |   | 1998-08-24 | analgesics                |
| 8  | Capecitabine      | Xeloda           | 1 |   | 1 | 1998-08-31 | antineoplastic agents     |
| 9  | Nevirapine        | Viramune         | 1 | 1 | 1 | 1998-09-04 | antivirals for systemic   |
| 10 |                   |                  |   |   |   |            | use                       |
| 11 | Clopidogrel       | Plavix           | 1 | 1 |   | 1998-10-07 | antithrombotic agents     |
| 12 | Brinzolamide      | Azopt            | 1 | 1 |   | 1998-10-23 | ophthalmologicals         |
| 13 |                   | ophthalmic       |   |   |   |            |                           |
| 14 |                   | suspension       |   |   |   |            |                           |
| 15 | Raloxifene        | Evista           | 1 | 1 |   | 1998-11-06 | sex hormones and          |
| 16 |                   |                  |   |   |   |            | modulators of the genital |
| 17 |                   |                  |   |   |   |            | svstem                    |
| 18 | Candesartan       | Atacand          | 1 | 1 |   | 1998-11-20 | agents acting on the      |
| 19 |                   |                  |   |   |   |            | renin-angiotensin system  |
| 20 |                   |                  |   |   |   |            |                           |
| 21 |                   |                  |   |   |   |            |                           |
| 22 |                   |                  |   |   |   |            |                           |
| 23 | Tolterodine       | Detrol           | 1 | 1 |   | 1998-11-20 | urologicals               |
| 24 | Varicella vaccine | Varivax          | 1 | 1 |   | 1998-12-02 | vaccines                  |
| 25 |                   |                  |   |   |   |            |                           |
| 26 | Alatrofloxacin    | Trovan (IV)      | 1 | 1 |   | 1998-12-04 | antibacterials for        |
| 27 |                   |                  |   |   |   |            | systemic use              |
| 28 | Trovafoxacin      | Trovan (tablets) | 1 | 1 |   | 1998-12-04 | antibacterials for        |
| 29 |                   |                  |   |   |   |            | systemic use              |
| 30 | Becaplermin gel   | Regranex         | 1 | 1 |   | 1998-12-30 | preparations for wounds   |
| 31 |                   |                  |   |   |   |            | and ulcers                |
| 32 | Tizanidine        | Zanaflex         | 1 | 1 |   | 1999-01-25 | muscle relaxants          |
| 33 | Penciclovir       | Denavir          | 1 | 1 |   | 1999-02-02 | antivirals for systemic   |
| 34 |                   |                  |   |   |   |            | use                       |
| 35 | Citalopram        | Celexa           | 1 | 1 |   | 1999-02-05 | psychoanaleptics          |
| 36 | Recombinant       | Niastase         | 1 |   | 1 | 1999-02-12 | antihemorrhagics          |
| 37 | factor VIIa       |                  |   |   |   |            |                           |
| 38 | Modafinil         | Alertec          | 1 | 1 |   | 1999-02-26 | psychoanaleptics          |
| 39 |                   |                  |   |   |   |            |                           |
| 40 |                   |                  |   |   |   |            |                           |
| 41 |                   |                  |   |   |   |            |                           |
| 42 |                   |                  |   |   |   |            |                           |
| 43 |                   |                  |   |   |   |            |                           |
| 44 |                   |                  |   |   |   |            |                           |
| 45 |                   |                  |   |   |   |            |                           |
| 46 |                   |                  |   |   |   |            |                           |
| 47 |                   |                  |   |   |   |            |                           |

For peer review only

|    |                  |            |   |   |   |            |                          |
|----|------------------|------------|---|---|---|------------|--------------------------|
| 1  |                  |            |   |   |   |            |                          |
| 2  |                  |            |   |   |   |            |                          |
| 3  | Sildenafil       | Viagra     | 1 | 1 |   | 1999-03-08 | urologicals              |
| 4  | Recombinant-     | Infergen   |   | 1 | 1 | 1999-03-11 | immunostimulants         |
| 5  | methionyl        |            |   |   |   |            |                          |
| 6  | interferon       |            |   |   |   |            |                          |
| 7  | consensus 1      |            |   |   |   |            |                          |
| 8  | Efavirenz        | Sustiva    | 1 | 1 |   | 1999-03-19 | antivirals for systemic  |
| 9  |                  |            |   |   |   |            | use                      |
| 10 | Repaglinide      | Gluconorm  | 1 | 1 |   | 1999-04-06 | drugs used in diabetes   |
| 11 | Celecoxib        | Celebrex   | 1 |   | 1 | 1999-04-14 | antiinflammatoary and    |
| 12 |                  |            |   |   |   |            | antirheumatic products   |
| 13 | Triptorelin      | Trelstar   | 1 | 1 |   | 1999-05-06 | endocrine therapy        |
| 14 | Ancestim         | Stemgen    | 1 | 1 |   | 1999-05-20 | immunostimulants         |
| 15 | Orlistat         | Xenical    | 1 | 1 |   | 1999-06-03 | antiobesity preparations |
| 16 | Abacavir         | Ziagen     | 1 |   | 1 | 1999-06-04 | antivirals for systemic  |
| 17 |                  |            |   |   |   |            | use                      |
| 18 | Eptifibatide     | Integrilin | 1 | 1 |   | 1999-06-11 | antithrombotic agents    |
| 19 | Eprosartan       | Teveten    | 1 | 1 |   | 1999-07-09 | agents acting on the     |
| 20 |                  |            |   |   |   |            | renin-angiotensin system |
| 21 | Cidofovir        | Vistide    | 1 | 1 |   | 1999-07-13 | antivirals for systemic  |
| 22 |                  |            |   |   |   |            | use                      |
| 23 | Rizatriptan      | Maxalt     | 1 | 1 |   | 1999-07-16 | analgesics               |
| 24 | Trastuzumab      | Herceptin  | 1 |   | 1 | 1999-08-13 | antineoplastic agents    |
| 25 | Telmisartan      | Micardis   | 1 | 1 |   | 1999-08-16 | agents acting on the     |
| 26 |                  |            |   |   |   |            | renin-angiotensin system |
| 27 | Risedronate      | Actonel    | 1 | 1 |   | 1999-08-18 | drugs for treatment of   |
| 28 |                  |            |   |   |   |            | bone disease             |
| 29 | Tirofiban        | Aggrastat  | 1 | 1 |   | 1999-08-19 | antithrombotic agents    |
| 30 | Icodextrin       | Extraneal  | 1 | 1 |   | 1999-09-17 | blood substitutes and    |
| 31 |                  |            |   |   |   |            | perfusion solutions      |
| 32 | Varicella zoster | Varilrix   | 1 |   | 1 | 1999-10-13 | vaccines                 |
| 33 | vaccine          |            |   |   |   |            |                          |
| 34 | Temozolomide     | Temodal    | 1 | 1 |   | 1999-10-25 | antineoplastic agents    |

|    |                 |            |   |   |            |            |   |                         |
|----|-----------------|------------|---|---|------------|------------|---|-------------------------|
| 1  |                 |            |   |   |            |            |   |                         |
| 2  |                 |            |   |   |            |            |   |                         |
| 3  | Rofecoxib       | Vioxx      | 1 | 1 | 1999-10-25 |            |   | antiinflammaotory and   |
| 4  |                 |            |   |   |            |            |   | antirheumatic products  |
| 5  | Zanamivir       | Relenza    | 1 | 1 | 1          | 1999-11-02 |   | antivirals for systemic |
| 6  |                 |            |   |   |            |            |   | use                     |
| 7  | Melanoma        | Melacine   | 1 | 1 | 1999-11-04 |            |   | immunostimulants        |
| 8  | theracine       |            |   |   |            |            |   |                         |
| 9  | Gadobutrol      | Gadovist   | 1 | 1 | 1999-11-08 |            |   | contrast media          |
| 10 | Dalfopristin    | Synercid   | 1 | 1 | 1999-12-10 |            |   | antibacterials for      |
| 11 |                 |            |   |   |            |            |   | systemic use            |
| 12 | Oseltamivir     | Tamiflu    | 1 | 1 | 1999-12-23 |            |   | antivirals for systemic |
| 13 |                 |            |   |   |            |            |   | use                     |
| 14 | Daclizumab      | Zenaprax   | 1 | 1 | 2000-01-04 |            | 1 | antineoplastic agents   |
| 15 | Leflunomide     | Arava      | 1 | 1 | 2000-03-16 | 1          |   | immunosuppressants      |
| 16 | Rituximab       | Rituxan    | 1 | 1 | 2000-03-17 |            | 1 | immunosuppressants      |
| 17 | Rosiglitazone   | Avandia    | 1 | 1 | 2000-03-21 | 1          |   | drugs used in diabetes  |
| 18 | Oxcarbazepine   | Trileptal  | 1 | 1 | 2000-04-13 | 1          |   | antiepileptics          |
| 19 | Rivastigmine    | Exelon     | 1 | 1 | 2000-04-13 | 1          |   | psychoanaleptics        |
| 20 | Zaleplon        | Starnoc    | 1 | 1 | 2000-05-11 | 1          |   | psycholeptics           |
| 21 | Verteporfin     | Visudyne   | 1 | 1 | 2000-05-31 | 1          |   | ophthalmologicals       |
| 22 | Cabergoline     | Dostinex   | 1 | 1 | 2000-06-30 | 1          |   | anti-parkinson drugs    |
| 23 | Exemestane      | Aromasin   | 1 | 1 | 2000-08-17 | 1          |   | endocrine therapy       |
| 24 | Pioglitazone    | Actos      | 1 | 1 | 2000-08-17 | 1          |   | drugs used in diabetes  |
| 25 | Zoledronic acid | Zometa     | 1 | 1 | 2000-08-21 | 1          |   | drugs for treatment of  |
| 26 |                 |            |   |   |            |            |   | bone disease            |
| 27 | Riluzole        | Rilutek    | 1 | 1 | 1          | 2000-08-30 | 1 | other nervous system    |
| 28 | Meloxicam       | Mobic      | 1 | 1 | 2000-08-31 | 1          |   | antiinflammaotory and   |
| 29 |                 |            |   |   |            |            |   | antirheumatic products  |
| 30 | Basiliximab     | Simulect   | 1 | 1 | 2000-09-01 |            | 1 | immunosuppressants      |
| 31 | Moxifloxacin    | Avelox     | 1 | 1 | 2000-10-19 | 1          |   | antibacterials for      |
| 32 |                 |            |   |   |            |            |   | systemic use            |
| 33 | Peginterferon   | Peg-intron | 1 | 1 | 2000-10-20 |            | 1 | immunostimulants        |
| 34 | Alfa-2b         |            |   |   |            |            |   |                         |
| 35 | Etanercept      | Enbrel     | 1 | 1 | 2000-12-01 |            | 1 | immunosuppressants      |
| 36 |                 |            |   |   |            |            |   |                         |
| 37 |                 |            |   |   |            |            |   |                         |
| 38 |                 |            |   |   |            |            |   |                         |
| 39 |                 |            |   |   |            |            |   |                         |
| 40 |                 |            |   |   |            |            |   |                         |
| 41 |                 |            |   |   |            |            |   |                         |
| 42 |                 |            |   |   |            |            |   |                         |
| 43 |                 |            |   |   |            |            |   |                         |
| 44 |                 |            |   |   |            |            |   |                         |
| 45 |                 |            |   |   |            |            |   |                         |
| 46 |                 |            |   |   |            |            |   |                         |
| 47 |                 |            |   |   |            |            |   |                         |

|    |                       |           |   |   |   |            |                                     |
|----|-----------------------|-----------|---|---|---|------------|-------------------------------------|
| 1  |                       |           |   |   |   |            |                                     |
| 2  |                       |           |   |   |   |            |                                     |
| 3  | Gadoversetamid        | Optimark  | 1 | 1 |   | 2000-12-11 | 1 contrast media                    |
| 4  | e                     |           |   |   |   |            |                                     |
| 5  | Sibutramine           | Meridia   | 1 | 1 |   | 2000-12-28 | 1 antiobesity preparations          |
| 6  | Sirolimus             | Rapamune  | 1 | 1 |   | 2001-01-05 | 1 immunosuppressants                |
| 7  | Gatifloxacin          | Tequin    | 1 | 1 |   | 2001-01-09 | 1 antibacterials for systemic use   |
| 8  |                       |           |   |   |   |            |                                     |
| 9  |                       |           |   |   |   |            |                                     |
| 10 | Glucagon, rDNA origin | Glucagon  | 1 |   | 1 | 2001-01-11 | 1 pancreatic hormones               |
| 11 |                       |           |   |   |   |            |                                     |
| 12 | Mequinol/tretinoin    | Solage    | 1 | 1 |   | 2001-01-17 | 1 other dermatological preparations |
| 13 |                       |           |   |   |   |            |                                     |
| 14 | Amprenavir            | Agenerase | 1 | 1 | 1 | 2001-03-01 | 1 antivirals for systemic use       |
| 15 |                       |           |   |   |   |            |                                     |
| 16 | Lopinavir/ritonavir   | Kaletra   | 1 |   | 1 | 2001-03-09 | 1 antivirals for systemic use       |
| 17 |                       |           |   |   |   |            |                                     |
| 18 | Linezolid             | Zyvoxam   | 1 | 1 |   | 2001-04-02 | 1 antibacterials for systemic use   |
| 19 |                       |           |   |   |   |            |                                     |
| 20 |                       |           |   |   |   |            |                                     |
| 21 | Iron                  | Venoferr  | 1 |   | 1 | 2001-04-17 | 1 antianemic preparations           |
| 22 | Doxercalciferol       | Hectorol  | 1 | 1 |   | 2001-04-30 | 1 calcium homeostasis               |
| 23 | Rabeprazole           | Pariet    | 1 | 1 |   | 2001-05-07 | 1 drugs for acid related disorders  |
| 24 |                       |           |   |   |   |            |                                     |
| 25 | Entacapone            | Comtan    | 1 | 1 |   | 2001-05-08 | 1 anti-parkinson drugs              |
| 26 | Eflornithine          | Vaniqa    | 1 | 1 |   | 2001-05-10 | 1 antiprotozoals                    |
| 27 | Mirtazapine           | Remeron   | 1 | 1 |   | 2001-05-18 | 1 psychoanaleptics                  |
| 28 | Desloratadine         | Aerius    | 1 | 1 |   | 2001-05-29 | 1 antihistamines for systemic use   |
| 29 |                       |           |   |   |   |            |                                     |
| 30 |                       |           |   |   |   |            |                                     |
| 31 | Infliximab            | Remicade  | 1 | 1 |   | 2001-06-06 | 1 immunosuppressants                |
| 32 | Caspofungin           | Cancidas  | 1 |   | 1 | 2001-07-29 | 1 antimycotics for systemic use     |
| 33 |                       |           |   |   |   |            |                                     |
| 34 |                       |           |   |   |   |            |                                     |
| 35 | Galantamine           | Reminyl   | 1 | 1 |   | 2001-07-31 | 1 psychoanaleptics                  |
| 36 | Esomeprazole          | Nexium    | 1 | 1 |   | 2001-08-17 | 1 drugs for acid related disorders  |
| 37 |                       |           |   |   |   |            |                                     |
| 38 | Imatinib              | Gleevec   |   |   | 1 | 2001-09-20 | 1 antineoplastic agents             |
| 39 | Tenecteplase          | Tnkase    | 1 | 1 |   | 2001-10-17 | 1 antithrombotic agents             |
| 40 | Travoprost            | Travatan  | 1 | 1 |   | 2001-11-09 | 1 ophthalmologicals                 |
| 41 |                       |           |   |   |   |            |                                     |
| 42 |                       |           |   |   |   |            |                                     |
| 43 |                       |           |   |   |   |            |                                     |
| 44 |                       |           |   |   |   |            |                                     |
| 45 |                       |           |   |   |   |            |                                     |
| 46 |                       |           |   |   |   |            |                                     |
| 47 |                       |           |   |   |   |            |                                     |

|    |                   |            |   |   |            |   |                           |
|----|-------------------|------------|---|---|------------|---|---------------------------|
| 1  |                   |            |   |   |            |   |                           |
| 2  |                   |            |   |   |            |   |                           |
| 3  | Bosentan          | Tracleer   | 1 | 1 | 2001-11-30 | 1 | antihypertensives         |
| 4  | Meningococcal     | Neisvac-C  | 1 | 1 | 2001-12-18 | 1 | vaccines                  |
| 5  | group C           |            |   |   |            |   |                           |
| 6  | polysaccharide,   |            |   |   |            |   |                           |
| 7  | tetanus toxoid    |            |   |   |            |   |                           |
| 8  | Glimepiride       | Amaryl     | 1 | 1 | 2002-01-25 | 1 | drugs used in diabetes    |
| 9  | Nateglinide       | Starlix    | 1 | 1 | 2002-02-13 | 1 | drugs used in diabetes    |
| 10 | Alfuzosin         | Xatral     | 1 | 1 | 2002-02-21 |   | urologicals               |
| 11 | Tegaserod         | Zelnorm    | 1 | 1 | 2002-03-12 | 1 | drugs for constipation    |
| 12 | Ganirelix         | Orgalutran | 1 | 1 | 2002-05-01 | 1 | pituitary and             |
| 13 |                   |            |   |   |            |   | hypothalamic hormones     |
| 14 | Valganciclovir    | Valcyte    | 1 | 1 | 2002-05-03 | 1 | antivirals for systemic   |
| 15 |                   |            |   |   |            |   | use                       |
| 16 | Palivizumab       | Synagis    | 1 | 1 | 2002-05-15 | 1 | immune sera and           |
| 17 |                   |            |   |   |            |   | immunoglobulins           |
| 18 | Docosanol         | Abreva     | 1 | 1 | 2002-05-24 | 1 | antibiotics and           |
| 19 |                   |            |   |   |            |   | chemotherapeutics for     |
| 20 |                   |            |   |   |            |   | dermatological use        |
| 21 | Bimatoprost       | Lumigan    | 1 | 1 | 2002-05-24 | 1 | ophthalmologicals         |
| 22 | Anakinra          | Kineret    | 1 | 1 | 2002-05-24 | 1 | immunosuppressants        |
| 23 | Moroctocog        | Refacto    | 1 | 1 | 2002-05-28 | 1 | antihemorrhagics          |
| 24 | alpha             |            |   |   |            |   |                           |
| 25 | Peginterferon     | Pegetron   | 1 | 1 | 2002-05-31 | 1 | immunostimulants          |
| 26 | Alfa-2b ribavirin |            |   |   |            |   |                           |
| 27 | Fondaparinux      | Arixtra    | 1 | 1 | 2002-06-13 | 1 | antithrombotic agents     |
| 28 | Hetastarch        | Hextend    | 1 | 1 | 2002-07-08 | 1 | blood substitutes and     |
| 29 |                   |            |   |   |            |   | perfusion solutions       |
| 30 | Darbepoetin       | Aranesp    | 1 | 1 | 2002-08-02 | 1 | antianemic preparations   |
| 31 | alpha             |            |   |   |            |   |                           |
| 32 | Norelgestromin/   | Evra       | 1 | 1 | 2002-08-20 | 1 | sex hormones and          |
| 33 | ethinyl estradiol |            |   |   |            |   | modulators of the genital |
| 34 |                   |            |   |   |            |   | system                    |
| 35 | Treprostinil      | Remodulin  | 1 | 1 | 2002-10-04 | 1 | antithrombotic agents     |
| 36 | Bivalirudin       | Angiomax   | 1 | 1 | 2002-10-09 | 1 | antithrombotic agents     |
| 37 |                   |            |   |   |            |   |                           |
| 38 |                   |            |   |   |            |   |                           |
| 39 |                   |            |   |   |            |   |                           |
| 40 |                   |            |   |   |            |   |                           |
| 41 |                   |            |   |   |            |   |                           |
| 42 |                   |            |   |   |            |   |                           |
| 43 |                   |            |   |   |            |   |                           |
| 44 |                   |            |   |   |            |   |                           |
| 45 |                   |            |   |   |            |   |                           |
| 46 |                   |            |   |   |            |   |                           |
| 47 |                   |            |   |   |            |   |                           |

|    |                                     |           |   |   |   |   |            |   |                                               |
|----|-------------------------------------|-----------|---|---|---|---|------------|---|-----------------------------------------------|
| 1  |                                     |           |   |   |   |   |            |   |                                               |
| 2  |                                     |           |   |   |   |   |            |   |                                               |
| 3  | Tiotropium                          | Spiriva   |   | 1 | 1 |   | 2002-11-20 | 1 | drugs for obstructive                         |
| 4  |                                     |           |   |   |   |   |            |   | airway diseases                               |
| 5  | Valdecoxib                          | Betra     |   | 1 | 1 |   | 2002-12-11 | 1 | antiinflammaotory and                         |
| 6  |                                     |           |   |   |   |   |            |   | antirheumatic products                        |
| 7  |                                     |           |   |   |   |   |            |   | antithrombotic agents                         |
| 8  | Drotrecogin Alfa                    | Xigris    | 1 |   |   |   | 2003-01-31 |   | 1                                             |
| 9  | Rosuvastatin                        | Crestor   |   | 1 | 1 |   | 2003-02-18 | 1 | lipid modifying agents                        |
| 10 | Recombinant cholera toxin B subunit | Dukoral   |   | 1 | 1 |   | 2003-02-21 |   | 1                                             |
| 11 |                                     |           |   |   |   |   |            |   | vaccines                                      |
| 12 | Levetiracetam                       | Keppra    |   | 1 | 1 |   | 2003-03-06 | 1 | antiepileptics                                |
| 13 | Tenofovir                           | Viread    |   | 1 |   | 1 | 2003-03-18 | 1 | antivirals for systemic use                   |
| 14 |                                     |           |   |   |   |   |            |   | other dermatological preparations             |
| 15 | Pimecrolimus                        | Elidel    |   | 1 | 1 |   | 2003-03-19 | 1 | antibacterials for systemic use               |
| 16 |                                     |           |   |   |   |   |            |   | lipid modifying agents                        |
| 17 | Ertapenem                           | Invanz    |   | 1 | 1 |   | 2003-05-12 | 1 | antibacterials for systemic use               |
| 18 |                                     |           |   |   |   |   |            |   | lipid modifying agents                        |
| 19 | Ezetimibe                           | Ezetrol   |   | 1 | 1 |   | 2003-05-12 | 1 | antibacterials for systemic use               |
| 20 | Telithromycin                       | Ketek     |   | 1 | 1 |   | 2003-05-28 | 1 | antibacterials for systemic use               |
| 21 |                                     |           |   |   |   |   |            |   | antivirals for systemic use                   |
| 22 | Enfuvirtide                         | Fuzeon    | 1 |   |   | 1 | 2003-07-14 | 1 | antivirals for systemic use                   |
| 23 |                                     |           |   |   |   |   |            |   | urologicals                                   |
| 24 | Dutasteride                         | Avodart   |   | 1 | 1 |   | 2003-07-22 | 1 | immunostimulants                              |
| 25 | Peginterferon Alfa-2a               | Pegasys   |   | 1 | 1 |   | 2003-08-13 |   | 1                                             |
| 26 | Cetrorelix                          | Cetrotide |   | 1 | 1 |   | 2003-08-13 | 1 | pituitary and hypothalamic hormones           |
| 27 |                                     |           |   |   |   |   |            |   | antivirals for systemic use                   |
| 28 | Adefovir                            | Hepsera   |   | 1 |   | 1 | 2003-08-27 | 1 | urologicals                                   |
| 29 |                                     |           |   |   |   |   |            |   | agents acting on the renin-angiotensin system |
| 30 | Tadalafil                           | Cialis    |   | 1 | 1 |   | 2003-09-17 | 1 |                                               |
| 31 | Almotriptan                         | Axert     |   | 1 | 1 |   | 2003-10-01 | 1 |                                               |
| 32 |                                     |           |   |   |   |   |            |   |                                               |
| 33 | Rasburicase                         | Fasturtec |   | 1 |   | 1 | 2003-10-29 |   | 1                                             |
| 34 |                                     |           |   |   |   |   |            |   | all other therapeutic products                |
| 35 |                                     |           |   |   |   |   |            |   |                                               |
| 36 |                                     |           |   |   |   |   |            |   |                                               |
| 37 |                                     |           |   |   |   |   |            |   |                                               |
| 38 |                                     |           |   |   |   |   |            |   |                                               |
| 39 |                                     |           |   |   |   |   |            |   |                                               |
| 40 |                                     |           |   |   |   |   |            |   |                                               |
| 41 |                                     |           |   |   |   |   |            |   |                                               |
| 42 |                                     |           |   |   |   |   |            |   |                                               |
| 43 |                                     |           |   |   |   |   |            |   |                                               |
| 44 |                                     |           |   |   |   |   |            |   |                                               |
| 45 |                                     |           |   |   |   |   |            |   |                                               |
| 46 |                                     |           |   |   |   |   |            |   |                                               |
| 47 |                                     |           |   |   |   |   |            |   |                                               |

|    |                   |             |   |   |            |            |   |                         |                           |
|----|-------------------|-------------|---|---|------------|------------|---|-------------------------|---------------------------|
| 1  |                   |             |   |   |            |            |   |                         |                           |
| 2  |                   |             |   |   |            |            |   |                         |                           |
| 3  | Atazanavir        | Reyataz     | 1 | 1 | 2003-12-05 | 1          |   | antivirals for systemic |                           |
| 4  |                   |             |   |   |            |            |   | use                     |                           |
| 5  | Gefitinib         | Iressa      | 1 | 1 | 1          | 2003-12-17 | 1 | antineoplastic agents   |                           |
| 6  | Agalsidase Beta   | Fabrazyme   | 1 | 1 |            | 2004-01-23 |   | 1                       | other alimentary tract    |
| 7  |                   |             |   |   |            |            |   |                         | and metabolism products   |
| 8  |                   |             |   |   |            |            |   |                         |                           |
| 9  |                   |             |   |   |            |            |   |                         |                           |
| 10 | Agalsidase        | Replagal    | 1 | 1 | 1          | 2004-02-06 |   | 1                       | other alimentary tract    |
| 11 |                   |             |   |   |            |            |   |                         | and metabolism products   |
| 12 |                   |             |   |   |            |            |   |                         |                           |
| 13 | Fulvestrant       | Faslodex    | 1 | 1 |            | 2004-02-17 | 1 |                         | endocrine therapy         |
| 14 | Gemifloxacin      | Factive     | 1 | 1 |            | 2004-03-09 | 1 |                         | antibacterials for        |
| 15 |                   |             |   |   |            |            |   |                         | systemic use              |
| 16 | Pegfilgrastim     | Neulasta    | 1 | 1 |            | 2004-03-12 |   | 1                       | immunostimulants          |
| 17 | Vardenafil        | Levitra     | 1 | 1 |            | 2004-03-17 | 1 |                         | urologicals               |
| 18 | Gadobenate        | Multihance  | 1 | 1 |            | 2004-03-31 | 1 |                         | contrast media            |
| 19 | Miglustat         | Zavesca     | 1 | 1 |            | 2004-03-31 | 1 |                         | other alimentary tract    |
| 20 |                   |             |   |   |            |            |   |                         | and metabolism products   |
| 21 |                   |             |   |   |            |            |   |                         |                           |
| 22 |                   |             |   |   |            |            |   |                         |                           |
| 23 | Botulinum Toxin   | Myobloc     | 1 | 1 |            | 2004-04-16 |   | 1                       | muscle relaxants          |
| 24 | Type B            |             |   |   |            |            |   |                         |                           |
| 25 | Peginterferon     | Pegasys RBV | 1 | 1 |            | 2004-05-10 |   | 1                       | immunostimulants          |
| 26 | Alfa-2A Ribavirin |             |   |   |            |            |   |                         |                           |
| 27 |                   |             |   |   |            |            |   |                         |                           |
| 28 |                   |             |   |   |            |            |   |                         |                           |
| 29 | Ethinyl           | Nuvaring    | 1 | 1 |            | 2004-05-11 | 1 |                         | sex hormones and          |
| 30 | estradiol/etonog  |             |   |   |            |            |   |                         | modulators of the genital |
| 31 | estrel            |             |   |   |            |            |   |                         | svstem                    |
| 32 | Pemetrexed        | Alimta      | 1 | 1 |            | 2004-05-21 | 1 |                         | antineoplastic agents     |
| 33 | Laronidase        | Adlurazyme  | 1 | 1 |            | 2004-05-31 |   | 1                       | other alimentary tract    |
| 34 |                   |             |   |   |            |            |   |                         | and metabolism products   |
| 35 |                   |             |   |   |            |            |   |                         |                           |
| 36 | Teriparatide      | Forteo      | 1 | 1 |            | 2004-06-03 |   | 1                       | calcium homeostasis       |
| 37 | Cinacalcet        | Sensipar    | 1 | 1 |            | 2004-08-04 | 1 |                         | calcium homeostasis       |
| 38 | Eletriptan        | Relpax      | 1 | 1 |            | 2004-08-05 | 1 |                         | analgesics                |
| 39 |                   |             |   |   |            |            |   |                         |                           |
| 40 |                   |             |   |   |            |            |   |                         |                           |
| 41 |                   |             |   |   |            |            |   |                         |                           |
| 42 |                   |             |   |   |            |            |   |                         |                           |
| 43 |                   |             |   |   |            |            |   |                         |                           |
| 44 |                   |             |   |   |            |            |   |                         |                           |
| 45 |                   |             |   |   |            |            |   |                         |                           |
| 46 |                   |             |   |   |            |            |   |                         |                           |
| 47 |                   |             |   |   |            |            |   |                         |                           |



|    |                 |              |   |   |   |            |                             |
|----|-----------------|--------------|---|---|---|------------|-----------------------------|
| 1  |                 |              |   |   |   |            |                             |
| 2  |                 |              |   |   |   |            |                             |
| 3  | Voriconazole    | Vfend        | 1 | 1 |   | 2004-08-20 | 1 antimycotics for systemic |
| 4  |                 |              |   |   |   |            | use                         |
| 5  | Frovatriptan    | Frova        | 1 | 1 |   | 2004-09-03 | 1 analgesics                |
| 6  | Adalimumab      | Humira       | 1 | 1 |   | 2004-09-24 | 1 immunosuppressants        |
| 7  | Alefacept       | Amevive      | 1 | 1 |   | 2004-10-06 | 1 immunosuppressants        |
| 8  | Omalizumab      | Xolair       | 1 | 1 |   | 2004-11-18 | 1 drugs for obstructive     |
| 9  |                 |              |   |   |   |            | airway diseases             |
| 10 | Memantine       | Ebixa        | 1 | 1 | 1 | 2004-12-08 | 1 psychoanaleptics          |
| 11 | Fosamprenavir   | Telzir       | 1 | 1 |   | 2004-12-10 | 1 antivirals for systemic   |
| 12 |                 |              |   |   |   |            | use                         |
| 13 | Drospirenone/et | Yasmin 21/28 | 1 | 1 |   | 2004-12-10 | 1 sex hormones and          |
| 14 | hinyI estradiol |              |   |   |   |            | modulators of the genital   |
| 15 |                 |              |   |   |   |            | svstem                      |
| 16 | Atomoxetine     | Strattera    | 1 | 1 |   | 2004-12-24 | 1 psychoanaleptics          |
| 17 | Escitalopram    | Cipralax     | 1 | 1 |   | 2004-12-24 | 1 psychoanaleptics          |
| 18 | Bortezomib      | Velcade      | 1 | 1 | 1 | 2005-01-27 | 1 antineoplastic agents     |
| 19 | Paricalcitol    | Zemplar      | 1 | 1 |   | 2005-03-31 | 1 calcium homeostasis       |
| 20 | Pantoprazole    | Pantaloc M   | 1 | 1 |   | 2005-04-22 | 1 drugs for acid related    |
| 21 |                 |              |   |   |   |            | disorders                   |
| 22 | Pegaptanib      | Macugen      | 1 | 1 |   | 2005-05-02 | 1 ophthalmologicals         |
| 23 | Ibritumomab     | Zevalin      | 1 | 1 |   | 2005-05-10 | 1 therapeutic               |
| 24 |                 |              |   |   |   |            | radiopharmaceuticals        |
| 25 | Pregabalin      | Lyrica       | 1 | 1 |   | 2005-06-03 | 1 antiepileptics            |
| 26 | Lutropin Alfa   | Luveris      | 1 | 1 |   | 2005-06-24 | 1 sex hormones and          |
| 27 |                 |              |   |   |   |            | modulators of the genital   |
| 28 |                 |              |   |   |   |            | svstem                      |
| 29 | Erlotinib       | Tarceva      | 1 | 1 |   | 2005-07-07 | 1 antineoplastic agents     |
| 30 | Tramadol        | Tramacet     | 1 | 1 |   | 2005-07-20 | 1 analgesics                |
| 31 | Sodium oxybate  | Xyrem        | 1 | 1 |   | 2005-08-05 | 1 other nervous system      |
| 32 | Perindopril     | Coversyl     | 1 | 1 |   | 2005-08-23 | 1 agents acting on the      |
| 33 |                 |              |   |   |   |            | renin-angiotensin system    |
| 34 | Bevacizumab     | Avastin      | 1 | 1 |   | 2005-09-09 | 1 antineoplastic agents     |
| 35 |                 |              |   |   |   |            |                             |
| 36 |                 |              |   |   |   |            |                             |
| 37 |                 |              |   |   |   |            |                             |
| 38 |                 |              |   |   |   |            |                             |
| 39 |                 |              |   |   |   |            |                             |
| 40 |                 |              |   |   |   |            |                             |
| 41 |                 |              |   |   |   |            |                             |
| 42 |                 |              |   |   |   |            |                             |
| 43 |                 |              |   |   |   |            |                             |
| 44 |                 |              |   |   |   |            |                             |
| 45 |                 |              |   |   |   |            |                             |
| 46 |                 |              |   |   |   |            |                             |
| 47 |                 |              |   |   |   |            |                             |

|    |                   |            |   |   |   |            |   |                         |
|----|-------------------|------------|---|---|---|------------|---|-------------------------|
| 1  |                   |            |   |   |   |            |   |                         |
| 2  |                   |            |   |   |   |            |   |                         |
| 3  | Cetuximab         | Erbix      | 1 |   | 1 | 2005-09-09 | 1 | antineoplastic agents   |
| 4  | Insulin detemir   | Levemir    | 1 | 1 |   | 2005-09-29 | 1 | drugs used in diabetes  |
| 5  | Pegvisomant       | Somavert   | 1 |   | 1 | 2005-10-17 | 1 | pituitary and           |
| 6  |                   |            |   |   |   |            |   | hypothalamic hormones   |
| 7  |                   |            |   |   |   |            |   |                         |
| 8  | Efalizumab        | Raptiva    | 1 | 1 |   | 2005-10-24 | 1 | immunosuppressants      |
| 9  | Darifenacin       | Enablex    | 1 | 1 |   | 2005-11-14 | 1 | urologicals             |
| 10 | Emtricitabine     | Emtriva    | 1 | 1 |   | 2005-11-21 | 1 | antivirals for systemic |
| 11 |                   |            |   |   |   |            |   | use                     |
| 12 |                   |            |   |   |   |            |   |                         |
| 13 | Tipranavir        | Aptivus    | 1 |   | 1 | 2005-11-21 | 1 | antivirals for systemic |
| 14 |                   |            |   |   |   |            |   | use                     |
| 15 | Alemtuzumab       | Mabcampath | 1 | 1 |   | 2005-11-30 | 1 | immunosuppressants      |
| 16 | Palifermin        | Kepivance  | 1 |   | 1 | 2005-12-09 | 1 | all other therapeutic   |
| 17 |                   |            |   |   |   |            |   | products                |
| 18 | Trospium          | Trosec     | 1 | 1 |   | 2006-01-10 | 1 | urologicals             |
| 19 | Solifenacin       | Vesicare   | 1 | 1 |   | 2006-02-20 | 1 | urologicals             |
| 20 | Histrelin         | Vantas     | 1 | 1 |   | 2006-03-10 | 1 | endocrine therapy       |
| 21 | Insulin glulisine | Apidra     | 1 | 1 |   | 2006-04-12 | 1 | drugs used in diabetes  |
| 22 | Sunitinib         | Sutent     | 1 |   | 1 | 2006-05-26 | 1 | antineoplastic agents   |
| 23 | Entecavir         | Baraclude  | 1 |   | 1 | 2006-06-16 | 1 | pituitary and           |
| 24 |                   |            |   |   |   |            |   | hypothalamic hormones   |
| 25 |                   |            |   |   |   |            |   | and analogues           |
| 26 |                   |            |   |   |   |            |   |                         |
| 27 | Abatacept         | Orencia    | 1 |   | 1 | 2006-06-29 | 1 | immunosuppressants      |
| 28 | Recombinant       | Gardasil   | 1 |   | 1 | 2006-07-10 | 1 | vaccines                |
| 29 | human             |            |   |   |   |            |   |                         |
| 30 | papillomavirus    |            |   |   |   |            |   |                         |
| 31 | Lanreotide        | Somatuline | 1 | 1 |   | 2006-07-17 | 1 | antivirals for systemic |
| 32 |                   | autogel    |   |   |   |            |   | use                     |
| 33 | Sorafenib         | Nexavar    | 1 | 1 |   | 2006-07-28 | 1 | antineoplastic agents   |
| 34 | Darunavir         | Prezista   | 1 | 1 | 1 | 2006-07-28 | 1 | antivirals for systemic |
| 35 |                   |            |   |   |   |            |   | use                     |
| 36 | Rotaviruses       | Rotateq    | 1 | 1 |   | 2006-08-01 | 1 | vaccines                |
| 37 |                   |            |   |   |   |            |   |                         |
| 38 |                   |            |   |   |   |            |   |                         |
| 39 |                   |            |   |   |   |            |   |                         |
| 40 |                   |            |   |   |   |            |   |                         |
| 41 |                   |            |   |   |   |            |   |                         |
| 42 |                   |            |   |   |   |            |   |                         |
| 43 |                   |            |   |   |   |            |   |                         |
| 44 |                   |            |   |   |   |            |   |                         |
| 45 |                   |            |   |   |   |            |   |                         |
| 46 |                   |            |   |   |   |            |   |                         |
| 47 |                   |            |   |   |   |            |   |                         |

|    |               |           |   |   |   |   |            |   |                           |
|----|---------------|-----------|---|---|---|---|------------|---|---------------------------|
| 1  |               |           |   |   |   |   |            |   |                           |
| 2  |               |           |   |   |   |   |            |   |                           |
| 3  | Alglucosidase | Myozyme   | 1 |   | 1 |   | 2006-08-14 | 1 | other alimentary tract    |
| 4  | Alfa          |           |   |   |   |   |            |   | and metabolism products   |
| 5  |               |           |   |   |   |   |            |   |                           |
| 6  | Rasagiline    | Azilect   |   | 1 | 1 |   | 2006-08-17 | 1 | anti-parkinson drugs      |
| 7  | Ciclesonide   | Alvesco   |   | 1 | 1 |   | 2006-09-11 | 1 | drugs for obstructive     |
| 8  |               |           |   |   |   |   |            |   | airway diseases           |
| 9  | Tigecycline   | Tygacil   |   | 1 | 1 |   | 2006-09-14 | 1 | antibacterials for        |
| 10 |               |           |   |   |   |   |            |   | systemic use              |
| 11 | Natalizumab   | Tysabri   |   | 1 | 1 |   | 2006-09-28 |   | immunosuppressants        |
| 12 | Lanthanum     | Fosrenol  |   | 1 | 1 |   | 2006-10-17 | 1 | all other therapeutic     |
| 13 |               |           |   |   |   |   |            |   | products                  |
| 14 | Deferasirox   | Exjade    |   | 1 | 1 | 1 | 2006-10-18 | 1 | all other therapeutic     |
| 15 |               |           |   |   |   |   |            |   | products                  |
| 16 | Gadofosveset  | Vasovist  |   | 1 | 1 |   | 2006-10-31 | 1 | contrast media            |
| 17 | Telbivudine   | Sebivo    |   | 1 | 1 |   | 2006-11-28 | 1 | antivirals for systemic   |
| 18 |               |           |   |   |   |   |            |   | use                       |
| 19 | Varenicline   | Champix   |   | 1 | 1 |   | 2007-01-24 | 1 | other nervous system      |
| 20 | Acamprosate   | Campral   |   | 1 | 1 |   | 2007-03-16 | 1 | other nervous system      |
| 21 | Dasatinib     | Sprycell  | 1 |   | 1 | 1 | 2007-03-26 | 1 | antineoplastic agents     |
| 22 | Posaconazole  | Spriafil  | 1 |   |   | 1 | 2007-03-26 | 1 | antimycotics for systemic |
| 23 |               | (Posanol) |   |   |   |   |            |   | use                       |
| 24 | Micafungin    | Mycamine  |   | 1 | 1 |   | 2007-05-22 | 1 | antimycotics for systemic |
| 25 |               |           |   |   |   |   |            |   | use                       |
| 26 | Sitaxentan    | Thelin    |   | 1 | 1 |   | 2007-05-30 | 1 | antihypertensives         |
| 27 | Idursulfase   | Elaprase  |   | 1 |   | 1 | 2007-06-13 | 1 | other alimentary tract    |
| 28 |               |           |   |   |   |   |            |   | and metabolism products   |
| 29 |               |           |   |   |   |   |            |   |                           |
| 30 | Oxaliplatin   | Eloxatin  |   | 1 | 1 |   | 2007-06-15 | 1 | antineoplastic agents     |
| 31 | Ranibizumab   | Lucentis  | 1 |   |   | 1 | 2007-06-26 |   | ophthalmologicals         |
| 32 | Fluticasone   | Avamys    |   | 1 | 1 |   | 2007-08-14 | 1 | drugs for obstructive     |
| 33 |               |           |   |   |   |   |            |   | airway diseases           |
| 34 | Aprepitant    | Emend     |   | 1 | 1 |   | 2007-08-24 | 1 | antiemetics and           |
| 35 |               |           |   |   |   |   |            |   | antinauseants             |
| 36 |               |           |   |   |   |   |            |   |                           |
| 37 |               |           |   |   |   |   |            |   |                           |
| 38 |               |           |   |   |   |   |            |   |                           |
| 39 |               |           |   |   |   |   |            |   |                           |
| 40 |               |           |   |   |   |   |            |   |                           |
| 41 |               |           |   |   |   |   |            |   |                           |
| 42 |               |           |   |   |   |   |            |   |                           |
| 43 |               |           |   |   |   |   |            |   |                           |
| 44 |               |           |   |   |   |   |            |   |                           |
| 45 |               |           |   |   |   |   |            |   |                           |
| 46 |               |           |   |   |   |   |            |   |                           |
| 47 |               |           |   |   |   |   |            |   |                           |

|    |                 |              |   |   |            |   |   |                           |
|----|-----------------|--------------|---|---|------------|---|---|---------------------------|
| 1  |                 |              |   |   |            |   |   |                           |
| 2  |                 |              |   |   |            |   |   |                           |
| 3  | Maraviroc       | Celsentri    | 1 | 1 | 2007-09-21 | 1 |   | antivirals for systemic   |
| 4  |                 |              |   |   |            |   |   | use                       |
| 5  | Daptomycin      | Cubicin      | 1 | 1 | 2007-09-24 | 1 |   | antibacterials for        |
| 6  |                 |              |   |   |            |   |   | systemic use              |
| 7  | Paliperidone    | Invega       | 1 | 1 | 2007-09-26 | 1 |   | psycholeptics             |
| 8  | Duloxetine      | Cymbalta     | 1 | 1 | 2007-11-01 | 1 |   | psychoanaesthetics        |
| 9  | Nesiritide      | Natrecor     | 1 | 1 | 2007-11-08 |   | 1 | cardiac therapy           |
| 10 | Aliskiren       | Rasilez      | 1 | 1 | 2007-11-14 | 1 |   | agents acting on the      |
| 11 |                 |              |   |   |            |   |   | renin-angiotensin system  |
| 12 |                 |              |   |   |            |   |   |                           |
| 13 |                 |              |   |   |            |   |   |                           |
| 14 | Anidulafungin   | Eraxis       | 1 | 1 | 2007-11-14 | 1 |   | antimycotics for systemic |
| 15 |                 |              |   |   |            |   |   | use                       |
| 16 | Raltegravir     | Isentress    | 1 | 1 | 2007-11-27 | 1 | 1 | antivirals for systemic   |
| 17 |                 |              |   |   |            |   |   | use                       |
| 18 | Rivastigmine    | Exelon patch | 1 | 1 | 2007-11-29 | 1 |   | psychoanaesthetics        |
| 19 | Sitagliptin     | Januvia      | 1 | 1 | 2007-12-14 | 1 |   | drugs used in diabetes    |
| 20 | Temsirolimus    | Torisel      | 1 | 1 | 2007-12-21 | 1 |   | antineoplastic agents     |
| 21 | Lenalidomide    | Revlimid     | 1 | 1 | 2008-01-17 | 1 | 1 | immunosuppressants        |
| 22 | Ambrisentan     | Volibris     | 1 | 1 | 2008-03-20 | 1 |   | antihypertensives         |
| 23 | Etravirine      | Intelence    | 1 | 1 | 2008-03-27 | 1 |   | antivirals for systemic   |
| 24 |                 |              |   |   |            |   |   | use                       |
| 25 | Methylnaltrexon | Relistor     | 1 | 1 | 2008-03-28 | 1 |   | drugs for constipation    |
| 26 | e               |              |   |   |            |   |   |                           |
| 27 | Panitumumab     | Vectibix     | 1 | 1 | 2008-04-03 |   | 1 | antineoplastic agents     |
| 28 | Nepafenac       | Nevanac      | 1 | 1 | 2008-04-17 | 1 |   | ophthalmologicals         |
| 29 | Dabigatran      | Pradaxa      | 1 | 1 | 2008-06-10 | 1 |   | antithrombotic agents     |
| 30 | Ceftobiprole    | Zeftera      | 1 | 1 | 2008-06-26 | 1 |   | antibacterials for        |
| 31 |                 |              |   |   |            |   |   | systemic use              |
| 32 | Idebenone       | Catena       | 1 | 1 | 2008-07-23 | 1 |   | psychoanaesthetics        |
| 33 | Nilotinib       | Tasigna      | 1 | 1 | 2008-09-09 | 1 |   | antineoplastic agents     |
| 34 | Rivaroxaban     | Xarelto      | 1 | 1 | 2008-09-15 | 1 |   | antithrombotic agents     |
| 35 |                 |              |   |   |            |   |   |                           |
| 36 |                 |              |   |   |            |   |   |                           |
| 37 |                 |              |   |   |            |   |   |                           |
| 38 |                 |              |   |   |            |   |   |                           |
| 39 |                 |              |   |   |            |   |   |                           |
| 40 |                 |              |   |   |            |   |   |                           |
| 41 |                 |              |   |   |            |   |   |                           |
| 42 |                 |              |   |   |            |   |   |                           |
| 43 |                 |              |   |   |            |   |   |                           |
| 44 |                 |              |   |   |            |   |   |                           |
| 45 |                 |              |   |   |            |   |   |                           |
| 46 |                 |              |   |   |            |   |   |                           |
| 47 |                 |              |   |   |            |   |   |                           |

|    |                 |           |   |   |   |            |   |                          |
|----|-----------------|-----------|---|---|---|------------|---|--------------------------|
| 1  |                 |           |   |   |   |            |   |                          |
| 2  |                 |           |   |   |   |            |   |                          |
| 3  | Olmesartan      | Olmotec   | 1 | 1 |   | 2008-10-28 | 1 | agents acting on the     |
| 4  |                 |           |   |   |   |            |   | renin-angiotensin system |
| 5  |                 |           |   |   |   |            |   |                          |
| 6  | Capsular        | Synflorix | 1 | 1 |   | 2008-12-11 |   | 1 vaccines               |
| 7  | polysaccharide  |           |   |   |   |            |   |                          |
| 8  | Ustekinumab     | Stelara   | 1 | 1 |   | 2008-12-12 |   | 1 immunosuppressants     |
| 9  | Loteprednol     | Alrex     | 1 | 1 |   | 2008-12-23 | 1 | ophthalmologicals        |
| 10 | Eculizumab      | Soliris   | 1 |   | 1 | 2009-01-28 |   | 1 immunosuppressants     |
| 11 | Desvenlafaxine  | Pristiq   | 1 | 1 |   | 2009-02-04 | 1 | psychoanaleptics         |
| 12 | Lisdexamfetami  | Vyvanse   | 1 | 1 |   | 2009-02-19 | 1 | psychoanaleptics         |
| 13 | ne              |           |   |   |   |            |   |                          |
| 14 | Romiplostim     | Nplate    | 1 |   | 1 | 2009-02-19 |   | 1 antihemorrhagics       |
| 15 | Methyl          | Metvix    | 1 | 1 |   | 2009-02-26 | 1 | antineoplastic agents    |
| 16 | aminolevulinate |           |   |   |   |            |   |                          |
| 17 | Eplerenone      | Inspra    | 1 | 1 |   | 2009-02-26 | 1 | diuretics                |
| 18 | Fosaprepitant   | Emend IV  | 1 | 1 |   | 2009-04-01 | 1 | antivirals for systemic  |
| 19 |                 |           |   |   |   |            |   | use                      |
| 20 | Golimumab       | Simponi   | 1 | 1 |   | 2009-04-07 |   | 1 immunosuppressants     |
| 21 | Lapatinib       | Tykerb    | 1 | 1 |   | 2009-05-15 | 1 | antineoplastic agents    |
| 22 | Vorinostat      | Zolinza   | 1 | 1 |   | 2009-06-11 | 1 | antineoplastic agents    |
| 23 | Aripiprazole    | Abilify   | 1 | 1 |   | 2009-07-09 | 1 | psycholeptics            |
| 24 | Clofarabine     | Clolar    | 1 | 1 |   | 2009-07-16 | 1 | antineoplastic agents    |
| 25 | Dronedarone     | Multaq    | 1 |   | 1 | 2009-08-11 | 1 | cardiac therapy          |
| 26 | Certolizumab    | Cimzia    | 1 | 1 |   | 2009-08-12 |   | 1 immunosuppressants     |
| 27 | Doripenem       | Doribax   | 1 | 1 |   | 2009-09-02 | 1 | antibacterials for       |
| 28 |                 |           |   |   |   |            |   | systemic use             |
| 29 | Aztreonam       | Cayston   | 1 |   | 1 | 2009-09-11 | 1 | antibacterials for       |
| 30 |                 |           |   |   |   |            |   | systemic use             |
| 31 | Saxagliptin     | Onglyza   | 1 | 1 |   | 2009-09-14 | 1 | drugs used in diabetes   |
| 32 | Besifloxacin    | Besivance | 1 | 1 |   | 2009-10-23 | 1 | ophthalmologicals        |
| 33 | Azacitidine     | Vidaza    | 1 |   | 1 | 2009-10-23 | 1 | antineoplastic agents    |
| 34 |                 |           |   |   |   |            |   |                          |
| 35 |                 |           |   |   |   |            |   |                          |
| 36 |                 |           |   |   |   |            |   |                          |
| 37 |                 |           |   |   |   |            |   |                          |
| 38 |                 |           |   |   |   |            |   |                          |
| 39 |                 |           |   |   |   |            |   |                          |
| 40 |                 |           |   |   |   |            |   |                          |
| 41 |                 |           |   |   |   |            |   |                          |
| 42 |                 |           |   |   |   |            |   |                          |
| 43 |                 |           |   |   |   |            |   |                          |
| 44 |                 |           |   |   |   |            |   |                          |
| 45 |                 |           |   |   |   |            |   |                          |
| 46 |                 |           |   |   |   |            |   |                          |
| 47 |                 |           |   |   |   |            |   |                          |

|    |                                           |                               |   |   |            |   |   |                                                |
|----|-------------------------------------------|-------------------------------|---|---|------------|---|---|------------------------------------------------|
| 1  |                                           |                               |   |   |            |   |   |                                                |
| 2  |                                           |                               |   |   |            |   |   |                                                |
| 3  | Japanese                                  | Ixiaro                        | 1 | 1 | 2009-10-29 |   | 1 | vaccines                                       |
| 4  | encephalitis                              |                               |   |   |            |   |   |                                                |
| 5  | vaccine                                   |                               |   |   |            |   |   |                                                |
| 6  | Alitretinoin                              | Toctino                       | 1 | 1 | 2009-11-13 |   | 1 | antineoplastic agents                          |
| 7  | Degarelix                                 | Firmagon                      | 1 | 1 | 2009-11-16 |   | 1 | endocrine therapy                              |
| 8  | Dexmedetomidine                           | Precedex                      | 1 | 1 | 2009-12-09 |   | 1 | psycholeptics                                  |
| 9  |                                           |                               |   |   |            |   |   |                                                |
| 10 | Everolimus                                | Afinitor                      | 1 | 1 | 2009-12-14 | 1 | 1 | antineoplastic agents                          |
| 11 | Thrombin alfa                             | Recothrom                     | 1 | 1 | 2009-12-15 |   | 1 | antihemorrhagics                               |
| 12 | Pneumococcal conjugate                    | Prevnar                       | 1 |   | 2009-12-21 | 1 | 1 | vaccines                                       |
| 13 | Gadoxetate                                | Primovist                     | 1 | 1 | 2010-01-14 |   | 1 | contrast media                                 |
| 14 | Recombinant human papillomavirus          | Cervarix                      | 1 | 1 | 2010-02-03 |   | 1 | vaccines                                       |
| 15 | Canakinumab                               | Ilaris                        |   |   | 2010-02-26 |   | 1 | immunosuppressants                             |
| 16 | Prasugrel                                 | Effient                       | 1 | 1 | 2010-04-16 |   | 1 | antithrombotic agents                          |
| 17 | Tocilizumab                               | Actemra                       | 1 | 1 | 2010-04-30 |   | 1 | immunosuppressants                             |
| 18 | Sapropterin                               | Kuvan                         | 1 |   | 2010-04-30 | 1 | 1 | other alimentary tract and metabolism products |
| 19 |                                           |                               |   |   |            |   |   |                                                |
| 20 | Trabectedin                               | Yondelis                      | 1 | 1 | 2010-05-13 |   | 1 | antineoplastic agents                          |
| 21 | Liraglutide                               | Victoza - 1.2 mg pen-injector | 1 | 1 | 2010-05-21 |   | 1 | drugs used in diabetes                         |
| 22 | Meningococcal oligosaccharides conjugated | Menveo                        | 1 | 1 | 2010-05-21 |   | 1 | vaccines                                       |
| 23 | Pazopanib                                 | Votrient                      | 1 | 1 | 2010-05-27 |   | 1 | antineoplastic agents                          |
| 24 | Paliperidone                              | Invega sustenna               | 1 | 1 | 2010-06-30 |   | 1 | psycholeptics                                  |
| 25 | Sevelamer                                 | Renvela                       | 1 | 1 | 2010-07-07 |   | 1 | all other therapeutic products                 |
| 26 | Dexlansoprazole                           | Dexilant                      | 1 | 1 | 2010-07-22 |   | 1 | drugs for acid related disorders               |
| 27 |                                           |                               |   |   |            |   |   |                                                |
| 28 |                                           |                               |   |   |            |   |   |                                                |
| 29 |                                           |                               |   |   |            |   |   |                                                |
| 30 |                                           |                               |   |   |            |   |   |                                                |
| 31 |                                           |                               |   |   |            |   |   |                                                |
| 32 |                                           |                               |   |   |            |   |   |                                                |
| 33 |                                           |                               |   |   |            |   |   |                                                |
| 34 |                                           |                               |   |   |            |   |   |                                                |
| 35 |                                           |                               |   |   |            |   |   |                                                |
| 36 |                                           |                               |   |   |            |   |   |                                                |
| 37 |                                           |                               |   |   |            |   |   |                                                |
| 38 |                                           |                               |   |   |            |   |   |                                                |
| 39 |                                           |                               |   |   |            |   |   |                                                |
| 40 |                                           |                               |   |   |            |   |   |                                                |
| 41 |                                           |                               |   |   |            |   |   |                                                |
| 42 |                                           |                               |   |   |            |   |   |                                                |
| 43 |                                           |                               |   |   |            |   |   |                                                |
| 44 |                                           |                               |   |   |            |   |   |                                                |
| 45 |                                           |                               |   |   |            |   |   |                                                |
| 46 |                                           |                               |   |   |            |   |   |                                                |
| 47 |                                           |                               |   |   |            |   |   |                                                |

|    |                    |                  |   |   |            |   |                         |
|----|--------------------|------------------|---|---|------------|---|-------------------------|
| 1  |                    |                  |   |   |            |   |                         |
| 2  |                    |                  |   |   |            |   |                         |
| 3  | Denosumab          | Prolia           | 1 | 1 | 2010-08-06 | 1 | drugs for treatment of  |
| 4  |                    |                  |   |   |            |   | bone disease            |
| 5  | Febuxostat         | Uloric           | 1 | 1 | 2010-09-22 | 1 | antigout preparations   |
| 6  | Lacosamide         | Vimpat           | 1 | 1 | 2010-09-30 | 1 | antiepileptics          |
| 7  | Velaglucerase alf. | VPRIV            | 1 | 1 | 2010-10-01 | 1 | other alimentary tract  |
| 8  |                    |                  |   |   |            |   | and metabolism products |
| 9  |                    |                  |   |   |            |   |                         |
| 10 |                    |                  |   |   |            |   |                         |
| 11 | Roflumilast        | Daxas            | 1 | 1 | 2010-11-23 | 1 | drugs for obstructive   |
| 12 |                    |                  |   |   |            |   | airway diseases         |
| 13 | Tapentadol         | Nucynta CR       | 1 | 1 | 2010-12-02 | 1 | analgesics              |
| 14 | Silodosin          | Rapaflo          | 1 | 1 | 2011-01-11 | 1 | urologicals             |
| 15 | Eltrombopag        | Revolade         | 1 | 1 | 2011-01-12 | 1 | antihemorrhagics        |
| 16 | Exenatide          | Byetta           | 1 | 1 | 2011-01-13 | 1 | drugs used in diabetes  |
| 17 | Fingolimod         | Gilenya          | 1 | 1 | 2011-03-09 | 1 | immunosuppressants      |
| 18 | Ticagrelor         | Brilinta         | 1 | 1 | 2011-05-30 | 1 | antithrombotic agents   |
| 19 | Cabazitaxel        | Jevtana          | 1 | 1 | 2011-06-16 | 1 | antineoplastic agents   |
| 20 | Rufinamide         | Banzel           | 1 | 1 | 2011-06-22 | 1 | antiepileptics          |
| 21 | Belimumab          | Benlysta         | 1 | 1 | 2011-07-06 | 1 | immunosuppressants      |
| 22 | Rilpivirine        | Edurant          | 1 | 1 | 2011-07-21 | 1 | antivirals for systemic |
| 23 |                    |                  |   |   |            |   | use                     |
| 24 | Tolvaptan          | Samsca           | 1 | 1 | 2011-07-25 | 1 | diuretics               |
| 25 | Abiraterone        | Zytiga           | 1 | 1 | 2011-07-27 | 1 | endocrine therapy       |
| 26 | Linagliptin        | Trajenta         | 1 | 1 | 2011-07-28 | 1 | drugs used in diabetes  |
| 27 | Boceprevir         | Victralis        | 1 | 1 | 2011-07-29 | 1 | antivirals for systemic |
| 28 |                    |                  |   |   |            |   | use                     |
| 29 | Boceprevir,        | Victralis Triple | 1 | 1 | 2011-08-10 | 1 | immunostimulants        |
| 30 | peginterferon      |                  |   |   |            |   |                         |
| 31 | alfa-2b, ribavirin |                  |   |   |            |   |                         |
| 32 | Telaprevir         | Incivek          | 1 | 1 | 2011-08-16 | 1 | antivirals for systemic |
| 33 |                    |                  |   |   |            |   | use                     |
| 34 | Colesevelam        | Lodalis          | 1 | 1 | 2011-09-22 | 1 | lipid modifying agents  |
| 35 | Senapine           | Saphris          | 1 | 1 | 2011-10-07 | 1 | psycholeptics           |
| 36 |                    |                  |   |   |            |   |                         |
| 37 |                    |                  |   |   |            |   |                         |
| 38 |                    |                  |   |   |            |   |                         |
| 39 |                    |                  |   |   |            |   |                         |
| 40 |                    |                  |   |   |            |   |                         |
| 41 |                    |                  |   |   |            |   |                         |
| 42 |                    |                  |   |   |            |   |                         |
| 43 |                    |                  |   |   |            |   |                         |
| 44 |                    |                  |   |   |            |   |                         |
| 45 |                    |                  |   |   |            |   |                         |
| 46 |                    |                  |   |   |            |   |                         |
| 47 |                    |                  |   |   |            |   |                         |

|    |               |            |   |   |              |   |                             |
|----|---------------|------------|---|---|--------------|---|-----------------------------|
| 1  |               |            |   |   |              |   |                             |
| 2  |               |            |   |   |              |   |                             |
| 3  | Dienogest     | Visanne    | 1 | 1 | 2011-10-12   | 1 | sex hormones and            |
| 4  |               |            |   |   |              |   | modulators of the genital   |
| 5  |               |            |   |   |              |   | svstem                      |
| 6  | Indacaterol   | Onbrez     | 1 | 1 | 2011-12-06   | 1 | drugs for obstructive       |
| 7  |               | breezhaler |   |   |              |   | airway diseases             |
| 8  | Prucalopride  | Resotran   | 1 | 1 | 2011-12-07   | 1 | drugs for constipation      |
| 9  | Plerixafor    | Mozobil    | 1 | 1 | 2011-12-08   | 1 | immunostimulants            |
| 10 | Eribulin      | Halaven    | 1 | 1 | 2011-12-14   | 1 | antineoplastic agents       |
| 11 | Apixaban      | Eliquis    | 1 | 1 | 2011-12-16   | 1 | antithrombotic agents       |
| 12 | Vandetanib    | Caprelsa   | 1 | 1 | 2012-01-12   | 1 | antineoplastic agents       |
| 13 | Ipilimumab    | Yervoy     | 1 | 1 | 2012-02-01   |   | 1 antineoplastic agents     |
| 14 | Fesoterodine  | Toviaz     | 1 | 1 | 2012-02-09   | 1 | urologicals                 |
| 15 | Fampridine    | Fampyra    | 1 | 1 | 2012-02-10   | 1 | other nervous system        |
| 16 | Vemurafenib   | Zelboraf   | 1 | 1 | 2012-02-15   |   | antineoplastic agents       |
| 17 | Azilsartan    | Edarbi     | 1 | 1 | 2012-03-08   | 1 | agents acting on the        |
| 18 |               |            |   |   |              |   | renin-angiotensin system    |
| 19 | Ofatumumab    | Arzerra    | 1 | 1 | 2012-03-09   |   | 1 antineoplastic agents     |
| 20 | Palonosetron  | Aloxi      | 1 | 1 | 2012-03-14   | 1 | antiemetics and             |
| 21 |               |            |   |   |              |   | antinauseants               |
| 22 | Crizotinib    | Xalkori    | 1 | 1 | 1 2012-04-25 | 1 | antineoplastic agents       |
| 23 | Fidaxomicin   | Dificid    | 1 | 1 | 2012-06-07   | 1 | antidiarrheals, intestinal  |
| 24 |               |            |   |   |              |   | antiinflammatory/antiinf    |
| 25 |               |            |   |   |              |   | ective agents               |
| 26 | Lurasidone    | Latuda     | 1 | 1 | 2012-06-13   | 1 | psycholeptics               |
| 27 | Ruxolitinib   | Jakavi     | 1 | 1 | 2012-06-19   | 1 | antineoplastic agents       |
| 28 | Collagenase   | Xiaflex    | 1 | 1 | 2012-07-05   |   | 1 other drugs for disorders |
| 29 | clostridium   |            |   |   |              |   | of the musculo-skeletal     |
| 30 | histolviticum |            |   |   |              |   | svstem                      |
| 31 | Axitinib      | Inlyta     | 1 | 1 | 2012-07-12   | 1 | antineoplastic agents       |
| 32 | Catridecacog  | Tretten    | 1 | 1 | 2012-07-19   |   | 1 antihemorrhagics          |
| 33 | Bendamustine  | Treanda    | 1 | 1 | 2012-08-24   | 1 | antineoplastic agents       |
| 34 | Pirfenidone   | Esbriet    | 1 | 1 | 2012-10-01   |   | immunosuppressants          |
| 35 |               |            |   |   |              |   |                             |
| 36 |               |            |   |   |              |   |                             |
| 37 |               |            |   |   |              |   |                             |
| 38 |               |            |   |   |              |   |                             |
| 39 |               |            |   |   |              |   |                             |
| 40 |               |            |   |   |              |   |                             |
| 41 |               |            |   |   |              |   |                             |
| 42 |               |            |   |   |              |   |                             |
| 43 |               |            |   |   |              |   |                             |
| 44 |               |            |   |   |              |   |                             |
| 45 |               |            |   |   |              |   |                             |
| 46 |               |            |   |   |              |   |                             |
| 47 |               |            |   |   |              |   |                             |



|    |                  |           |   |   |   |            |   |                           |
|----|------------------|-----------|---|---|---|------------|---|---------------------------|
| 1  |                  |           |   |   |   |            |   |                           |
| 2  |                  |           |   |   |   |            |   |                           |
| 3  | Elvitegravir,    | Stribild  | 1 | 1 |   | 2012-11-26 | 1 | antivirals for systemic   |
| 4  | emtricitabine,   |           |   |   |   |            |   | use                       |
| 5  | tenofovir,       |           |   |   |   |            |   |                           |
| 6  | cobicistat       |           |   |   |   |            |   |                           |
| 7  |                  |           |   |   |   |            |   |                           |
| 8  | Ivacaftor        | Kalydeco  | 1 | 1 |   | 2012-11-26 | 1 | other respiratory system  |
| 9  |                  |           |   |   |   |            |   | products                  |
| 10 | Stiripentol      | Diacomit  | 1 | 1 |   | 2012-12-21 | 1 | antiepileptics            |
| 11 | Nebivolol        | Bystolic  | 1 | 1 |   | 2012-12-21 | 1 | beta blocking agents      |
| 12 | Ingenol          | Picato    | 1 | 1 |   | 2013-01-30 | 1 | antibiotics and           |
| 13 |                  |           |   |   |   |            |   | chemotherapeutics for     |
| 14 |                  |           |   |   |   |            |   | dermatological use        |
| 15 |                  |           |   |   |   |            |   | antineoplastic agents     |
| 16 | Brentuximab      | Adcetris  | 1 | 1 | 1 | 2013-02-01 | 1 |                           |
| 17 | Meningococcal    | Nimenrix  | 1 | 1 |   | 2013-03-05 | 1 | vaccines                  |
| 18 | polysaccharide   |           |   |   |   |            |   |                           |
| 19 | groups A,C,W-    |           |   |   |   |            |   |                           |
| 20 | 135 & Y          |           |   |   |   |            |   |                           |
| 21 | conjugate        |           |   |   |   |            |   |                           |
| 22 | vaccine, Tetanus |           |   |   |   |            |   |                           |
| 23 | toxoid           |           |   |   |   |            |   |                           |
| 24 | Mirabegron       | Myrbetriq | 1 | 1 |   | 2013-03-06 | 1 | urologicals               |
| 25 | Regorafenib      | Stivarga  | 1 | 1 |   | 2013-03-11 | 1 | antineoplastic agents     |
| 26 | Rotigotine       | Neupro    | 1 | 1 |   | 2013-03-21 | 1 | anti-parkinson drugs      |
| 27 | Dimethyl         | Tecfidera | 1 | 1 |   | 2013-04-03 | 1 | other nervous system      |
| 28 | Perampanel       | Fycompa   | 1 | 1 |   | 2013-04-04 | 1 | antiepileptics            |
| 29 | Pertuzumab       | Perjeta   | 1 | 1 |   | 2013-04-12 | 1 | antineoplastic agents     |
| 30 | Enzalutamide     | Xtandi    | 1 | 1 |   | 2013-05-29 | 1 | endocrine therapy         |
| 31 | Ulipristal       | Fibristal | 1 | 1 |   | 2013-06-24 | 1 | sex hormones and          |
| 32 |                  |           |   |   |   |            |   | modulators of the genital |
| 33 |                  |           |   |   |   |            |   | system                    |
| 34 | Vismodegib       | Erivedge  | 1 | 1 |   | 2013-07-12 | 1 | antineoplastic agents     |
| 35 | Dabrafenib       | Tafinlar  | 1 | 1 |   | 2013-07-16 | 1 | antineoplastic agents     |
| 36 | Trametinib       | Mekinist  | 1 | 1 |   | 2013-07-18 | 1 | antineoplastic agents     |
| 37 |                  |           |   |   |   |            |   |                           |
| 38 |                  |           |   |   |   |            |   |                           |
| 39 |                  |           |   |   |   |            |   |                           |
| 40 |                  |           |   |   |   |            |   |                           |
| 41 |                  |           |   |   |   |            |   |                           |
| 42 |                  |           |   |   |   |            |   |                           |
| 43 |                  |           |   |   |   |            |   |                           |
| 44 |                  |           |   |   |   |            |   |                           |
| 45 |                  |           |   |   |   |            |   |                           |
| 46 |                  |           |   |   |   |            |   |                           |
| 47 |                  |           |   |   |   |            |   |                           |

|    |                                        |                 |   |   |   |            |   |                                                     |
|----|----------------------------------------|-----------------|---|---|---|------------|---|-----------------------------------------------------|
| 1  |                                        |                 |   |   |   |            |   |                                                     |
| 2  |                                        |                 |   |   |   |            |   |                                                     |
| 3  | Fluticasone and vilatnerol             | Breo ellipta    |   | 1 | 1 | 2013-07-23 | 1 | drugs for obstructive airway diseases               |
| 4  |                                        |                 |   |   |   |            |   |                                                     |
| 5  | Aclidinium                             | Tudorza genuair |   | 1 | 1 | 2013-07-29 | 1 | drugs for obstructive airway diseases               |
| 6  |                                        |                 |   |   |   |            |   |                                                     |
| 7  | Rifaximin                              | Zaxine          |   | 1 | 1 | 2013-08-13 | 1 | antidiarrheals, intestinal antiinflammatory/antiinf |
| 8  |                                        |                 |   |   |   |            |   |                                                     |
| 9  |                                        |                 |   |   |   |            |   |                                                     |
| 10 |                                        |                 |   |   |   |            |   |                                                     |
| 11 | Ocriplasmin                            | Jetrea          | 1 |   |   | 2013-08-13 | 1 | effective agents ophthalmologicals                  |
| 12 | Trastuzumab                            | Kadcyla         |   | 1 | 1 | 2013-09-11 | 1 | antineoplastic agents                               |
| 13 | emtansine                              |                 |   |   |   |            |   |                                                     |
| 14 | Galsulfase                             | Naglazyme       | 1 |   | 1 | 2013-09-16 | 1 | other alimentary tract and metabolism products      |
| 15 |                                        |                 |   |   |   |            |   |                                                     |
| 16 |                                        |                 |   |   |   |            |   |                                                     |
| 17 | Riociguat                              | Adempas         |   | 1 | 1 | 2013-09-19 | 1 | antihypertensives                                   |
| 18 | Pasireotide                            | Signifor        | 1 |   | 1 | 2013-09-23 | 1 | pituitary and hypothalamic hormones                 |
| 19 |                                        |                 |   |   |   |            |   |                                                     |
| 20 |                                        |                 |   |   |   |            |   |                                                     |
| 21 | Efinaconazole                          | Jublia          |   | 1 | 1 | 2013-10-02 | 1 | drugs used in diabetes                              |
| 22 | Romidepsin                             | Istodax         |   | 1 | 1 | 2013-10-16 | 1 | antineoplastic agents                               |
| 23 | Dolutegravir                           | Tivicay         |   | 1 | 1 | 2013-10-31 | 1 | antivirals for systemic use                         |
| 24 |                                        |                 |   |   |   |            |   |                                                     |
| 25 | Afatinib                               | Giotrif         |   | 1 | 1 | 2013-11-01 | 1 | antineoplastic agents                               |
| 26 | Macitentan                             | Opsumit         |   | 1 | 1 | 2013-11-06 | 1 | antihypertensives                                   |
| 27 | Aflibercept                            | Eylea           |   | 1 | 1 | 2013-11-08 | 1 | antineoplastic agents                               |
| 28 | Teriflunomide                          | Aubagio         |   | 1 | 1 | 2013-11-14 | 1 | immunosuppressants                                  |
| 29 | Simeprevir                             | Galexos         |   | 1 | 1 | 2013-11-18 | 1 | antivirals for systemic use                         |
| 30 |                                        |                 |   |   |   |            |   |                                                     |
| 31 | Alogliptin                             | Nesina          |   | 1 | 1 | 2013-11-27 | 1 | drugs used in diabetes                              |
| 32 | Linacotide                             | Constella       |   | 1 | 1 | 2013-12-02 | 1 | drugs for constipation                              |
| 33 | Multicomponent meningococcal B vaccine | Bexsero         | 1 |   | 1 | 2013-12-06 | 1 | vaccines                                            |
| 34 |                                        |                 |   |   |   |            |   |                                                     |
| 35 | Radium-223 dichloride                  | Xofigo          |   | 1 | 1 | 2013-12-12 | 1 | therapeutic radiopharmaceuticals                    |
| 36 |                                        |                 |   |   |   |            |   |                                                     |
| 37 |                                        |                 |   |   |   |            |   |                                                     |
| 38 |                                        |                 |   |   |   |            |   |                                                     |
| 39 |                                        |                 |   |   |   |            |   |                                                     |
| 40 |                                        |                 |   |   |   |            |   |                                                     |
| 41 |                                        |                 |   |   |   |            |   |                                                     |
| 42 |                                        |                 |   |   |   |            |   |                                                     |
| 43 |                                        |                 |   |   |   |            |   |                                                     |
| 44 |                                        |                 |   |   |   |            |   |                                                     |
| 45 |                                        |                 |   |   |   |            |   |                                                     |
| 46 |                                        |                 |   |   |   |            |   |                                                     |
| 47 |                                        |                 |   |   |   |            |   |                                                     |

|    |                   |               |   |   |   |              |   |                           |
|----|-------------------|---------------|---|---|---|--------------|---|---------------------------|
| 1  |                   |               |   |   |   |              |   |                           |
| 2  |                   |               |   |   |   |              |   |                           |
| 3  | Sofosbuvir        | Sovaldi       | 1 |   | 1 | 2013-12-13   | 1 | antivirals for systemic   |
| 4  |                   |               |   |   |   |              |   | use                       |
| 5  | Umeclidinium      | Anoro ellipta |   | 1 | 1 | 2013-12-23   | 1 | drugs for obstructive     |
| 6  | and vilanterol    |               |   |   |   |              |   | airway diseases           |
| 7  | Pomalidomide      | Pomalyst      | 1 |   | 1 | 2014-01-20   | 1 | immunosuppressants        |
| 8  | Lomitapide        | Juxtapid      |   | 1 | 1 | 2014-02-04   | 1 | lipid modifying agents    |
| 9  | Aflibercept       | Zaltrap       |   | 1 | 1 | 2014-02-12   |   | 1 antineoplastic agents   |
| 10 | Bosutinibs        | Bosulif       |   | 1 | 1 | 1 2014-03-14 | 1 | antineoplastic agents     |
| 11 | Recombinant       | Alprolix      |   | 1 | 1 | 2014-03-20   |   | 1 antihemorrhagics        |
| 12 | human             |               |   |   |   |              |   |                           |
| 13 | coagulation       |               |   |   |   |              |   |                           |
| 14 | Factor IX, FC     |               |   |   |   |              |   |                           |
| 15 | fusion protein    |               |   |   |   |              |   |                           |
| 16 | Tofacitinib       | Xeljanz       |   | 1 | 1 | 2014-04-17   | 1 | immunosuppressants        |
| 17 | Tesamorelin       | Egrifta       |   | 1 | 1 | 2014-04-29   | 1 | pituitary and             |
| 18 |                   |               |   |   |   |              |   | hypothalamic hormones     |
| 19 | Canagliflozin     | Invokana      |   | 1 | 1 | 2014-05-23   | 1 | drugs used in diabetes    |
| 20 | Taliglucerase     | Elelyso       |   | 1 | 1 | 2014-05-29   |   | 1 other alimentary tract  |
| 21 | Alfa              |               |   |   |   |              |   | and metabolism products   |
| 22 | Eslicarbazepine   | Aptiom        |   | 1 | 1 | 2014-07-08   | 1 | antiepileptics            |
| 23 | Antihemophilic    | Eloctate      |   | 1 | 1 | 2014-08-22   |   | 1 antihemorrhagics        |
| 24 | factor, FC fusion |               |   |   |   |              |   |                           |
| 25 | protein           |               |   |   |   |              |   |                           |
| 26 | Ledipasvir and    | Harvoni       |   | 1 | 1 | 2014-10-15   | 1 | antivirals for systemic   |
| 27 | sofosbuvir        |               |   |   |   |              |   | use                       |
| 28 | Vortioxetine      | Trintellix    |   | 1 | 1 | 2014-10-22   | 1 | psychoanaleptics          |
| 29 | Simoctocog alfa   | Nuwiq         |   | 1 | 1 | 2014-10-23   |   | 1 antihemorrhagics        |
| 30 | Azelastine and    | Dymista       |   | 1 | 1 | 2014-10-23   | 1 | nasal preparations        |
| 31 | fluticasone       |               |   |   |   |              |   |                           |
| 32 | Conjugated        | Duavive       |   | 1 | 1 | 2014-10-23   | 1 | sex hormones and          |
| 33 | estrogens and     |               |   |   |   |              |   | modulators of the genital |
| 34 | bazedoxifene      |               |   |   |   |              |   | system                    |
| 35 | acetate           |               |   |   |   |              |   |                           |
| 36 |                   |               |   |   |   |              |   |                           |
| 37 |                   |               |   |   |   |              |   |                           |
| 38 |                   |               |   |   |   |              |   |                           |
| 39 |                   |               |   |   |   |              |   |                           |
| 40 |                   |               |   |   |   |              |   |                           |
| 41 |                   |               |   |   |   |              |   |                           |
| 42 |                   |               |   |   |   |              |   |                           |
| 43 |                   |               |   |   |   |              |   |                           |
| 44 |                   |               |   |   |   |              |   |                           |
| 45 |                   |               |   |   |   |              |   |                           |
| 46 |                   |               |   |   |   |              |   |                           |
| 47 |                   |               |   |   |   |              |   |                           |

|    |                  |             |   |   |   |   |   |            |   |                         |
|----|------------------|-------------|---|---|---|---|---|------------|---|-------------------------|
| 1  |                  |             |   |   |   |   |   |            |   |                         |
| 2  |                  |             |   |   |   |   |   |            |   |                         |
| 3  | Apremilast       | Otezla      |   | 1 | 1 |   |   | 2014-11-12 | 1 | immunosuppressants      |
| 4  | Ibrutinib        | Imbruvica   | 1 |   |   | 1 | 1 | 2014-11-17 | 1 | antineoplastic agents   |
| 5  | Obinutuzumab     | Gazyva      | 1 |   | 1 |   |   | 2014-11-25 |   | 1 antineoplastic agents |
| 6  | Siltuximab       | Sylvant     |   | 1 |   | 1 |   | 2014-12-03 |   | 1 immunosuppressants    |
| 7  | Dapagliflozin    | Forxiga     |   | 1 | 1 |   |   | 2014-12-12 | 1 | drugs used in diabetes  |
| 8  | Ritonavir,       | Holkira Pak |   | 1 |   | 1 |   | 2014-12-22 | 1 | antivirals for systemic |
| 9  | paritaprevir,    |             |   |   |   |   |   |            |   | use                     |
| 10 | ombitasvir,      |             |   |   |   |   |   |            |   |                         |
| 11 | dasabuvir        |             |   |   |   |   |   |            |   |                         |
| 12 | Sodium           | Pheburane   |   | 1 |   | 1 |   | 2015-01-26 | 1 | other alimentary tract  |
| 13 | phenylbutyrate   |             |   |   |   |   |   |            |   | and metabolism products |
| 14 | Vedolizumab      | Entyvio     |   | 1 | 1 |   |   | 2015-01-29 |   | 1 immunosuppressants    |
| 15 | Human            | Gardasil 9  |   | 1 | 1 |   |   | 2015-02-05 |   | 1 vaccines              |
| 16 | papillomavirus 9 |             |   |   |   |   |   |            |   |                         |
| 17 | valent vaccine,  |             |   |   |   |   |   |            |   |                         |
| 18 | recombinant      |             |   |   |   |   |   |            |   |                         |
| 19 | Deferiprone      | Ferriprox   |   | 1 | 1 |   |   | 2015-02-13 | 1 | all other therapeutic   |
| 20 |                  |             |   |   |   |   |   |            |   | products                |
| 21 | Secukinumab      | Cosentyx    |   | 1 | 1 |   |   | 2015-02-27 |   | 1 immunosuppressants    |
| 22 | Tedizolid        | Sivextro    |   | 1 | 1 |   |   | 2015-03-17 | 1 | antibacterials for      |
| 23 |                  |             |   |   |   |   |   |            |   | systemic use            |
| 24 | Idelalisib       | Zydelig     |   | 1 | 1 |   | 1 | 2015-03-27 | 1 | antineoplastic agents   |
| 25 | Ceritinib        | Zykadia     |   | 1 | 1 |   | 1 | 2015-03-27 | 1 | antineoplastic agents   |
| 26 | Ponatinib        | Iclusig     |   | 1 | 1 |   | 1 | 2015-04-02 | 1 | antineoplastic agents   |
| 27 | Carglumic Acid   | Carbaglu    | 1 |   |   | 1 |   | 2015-04-10 | 1 | other alimentary tract  |
| 28 |                  |             |   |   |   |   |   |            |   | and metabolism products |
| 29 | Ivermectin       | Rosiver     |   | 1 | 1 |   |   | 2015-04-22 | 1 | anthelmintics           |
| 30 | Levomilnacipran  | Fetzima     |   | 1 | 1 |   |   | 2015-05-08 | 1 | psychoanaleptics        |
| 31 | Pembrolizumab    | Keytruda    |   | 1 | 1 |   | 1 | 2015-05-19 |   | 1 antineoplastic agents |
| 32 | Naloxegol        | Movantik    |   | 1 | 1 |   |   | 2015-06-02 | 1 | drugs for constipation  |
| 33 | Nintedanib       | Ofev        |   | 1 | 1 |   |   | 2015-06-25 | 1 | antineoplastic agents   |
| 34 |                  |             |   |   |   |   |   |            |   |                         |
| 35 |                  |             |   |   |   |   |   |            |   |                         |
| 36 |                  |             |   |   |   |   |   |            |   |                         |
| 37 |                  |             |   |   |   |   |   |            |   |                         |
| 38 |                  |             |   |   |   |   |   |            |   |                         |
| 39 |                  |             |   |   |   |   |   |            |   |                         |
| 40 |                  |             |   |   |   |   |   |            |   |                         |
| 41 |                  |             |   |   |   |   |   |            |   |                         |
| 42 |                  |             |   |   |   |   |   |            |   |                         |
| 43 |                  |             |   |   |   |   |   |            |   |                         |
| 44 |                  |             |   |   |   |   |   |            |   |                         |
| 45 |                  |             |   |   |   |   |   |            |   |                         |
| 46 |                  |             |   |   |   |   |   |            |   |                         |
| 47 |                  |             |   |   |   |   |   |            |   |                         |

|    |                 |            |   |   |  |            |   |                           |
|----|-----------------|------------|---|---|--|------------|---|---------------------------|
| 1  |                 |            |   |   |  |            |   |                           |
| 2  |                 |            |   |   |  |            |   |                           |
| 3  | Ramucirumab     | Cyramza    | 1 | 1 |  | 2015-07-16 |   | 1 antineoplastic agents   |
| 4  | Empagliflozin   | Jardiance  | 1 | 1 |  | 2015-07-23 | 1 | drugs used in diabetes    |
| 5  | Mifepristone    | Mifegymiso | 1 | 1 |  | 2015-07-29 | 1 | sex hormones and          |
| 6  | and Misoprostol |            |   |   |  |            |   | modulators of the genital |
| 7  |                 |            |   |   |  |            |   | svstem                    |
| 8  | Daclatasvir     | Daklinza   | 1 | 1 |  | 2015-08-13 | 1 | antivirals for systemic   |
| 9  |                 |            |   |   |  |            |   | use                       |
| 10 | Asfotase Alfa   | Strensiq   | 1 | 1 |  | 2015-08-14 |   | 1 other alimentary tract  |
| 11 |                 |            |   |   |  |            |   | and metabolism products   |
| 12 |                 |            |   |   |  |            |   |                           |
| 13 |                 |            |   |   |  |            |   |                           |
| 14 | Teduglutide     | Revestive  | 1 | 1 |  | 2015-09-04 |   | 1 other alimentary tract  |
| 15 |                 |            |   |   |  |            |   | and metabolism products   |
| 16 |                 |            |   |   |  |            |   |                           |
| 17 | Evolocumab      | Repatha    | 1 | 1 |  | 2015-09-10 |   | 1 lipid modifying agents  |
| 18 | Nivolumab       | Opdivo     | 1 | 1 |  | 2015-09-25 |   | 1 antineoplastic agents   |
| 19 | Ceftolozane     | Zerbaxa    | 1 | 1 |  | 2015-09-30 | 1 | antibacterials for        |
| 20 | Sulfate and     |            |   |   |  |            |   | systemic use              |
| 21 | Tazobactam      |            |   |   |  |            |   |                           |
| 22 | Sodium          |            |   |   |  |            |   |                           |
| 23 | Sacubitril,     | Entresto   | 1 | 1 |  | 2015-10-02 | 1 | agents acting on the      |
| 24 | Valsartan       |            |   |   |  |            |   | renin-angiotensin system  |
| 25 |                 |            |   |   |  |            |   |                           |
| 26 | Dulaglutide     | Trulicity  | 1 | 1 |  | 2015-11-10 |   | 1 drugs used in diabetes  |
| 27 | Elvitegravir,   | Genvoya    | 1 | 1 |  | 2015-11-27 | 1 | antivirals for systemic   |
| 28 | Cobicistat,     |            |   |   |  |            |   | use                       |
| 29 | Emtricitabine,  |            |   |   |  |            |   |                           |
| 30 | Tenofovir       |            |   |   |  |            |   |                           |
| 31 | Alafenamide     |            |   |   |  |            |   |                           |
| 32 | Humifumate      |            |   |   |  |            |   |                           |
| 33 | Mepolizumab     | Nucala     | 1 | 1 |  | 2015-12-03 |   | 1 drugs for obstructive   |
| 34 |                 |            |   |   |  |            |   | airway diseases           |
| 35 | Lenvatinib      | Lenvima    | 1 | 1 |  | 2015-12-22 | 1 | antineoplastic agents     |
| 36 | Blinatumomab    | Blincyto   | 1 | 1 |  | 2015-12-22 |   | 1 antineoplastic agents   |
| 37 | Carfilzomib     | Kyprolis   | 1 | 1 |  | 2016-01-15 | 1 | antineoplastic agents     |
| 38 |                 |            |   |   |  |            |   |                           |
| 39 |                 |            |   |   |  |            |   |                           |
| 40 |                 |            |   |   |  |            |   |                           |
| 41 |                 |            |   |   |  |            |   |                           |
| 42 |                 |            |   |   |  |            |   |                           |
| 43 |                 |            |   |   |  |            |   |                           |
| 44 |                 |            |   |   |  |            |   |                           |
| 45 |                 |            |   |   |  |            |   |                           |
| 46 |                 |            |   |   |  |            |   |                           |
| 47 |                 |            |   |   |  |            |   |                           |

|    |                 |                |   |   |            |   |   |                          |
|----|-----------------|----------------|---|---|------------|---|---|--------------------------|
| 1  |                 |                |   |   |            |   |   |                          |
| 2  |                 |                |   |   |            |   |   |                          |
| 3  | Elbasvir,       | Zepatier       | 1 | 1 | 2016-01-19 | 1 |   | antivirals for systemic  |
| 4  | Grazoprevir     |                |   |   |            |   |   | use                      |
| 5  | Selexipag       | Uptravi        | 1 | 1 | 2016-01-20 | 1 |   | antithrombotic agents    |
| 6  | Ivacaftor,      | Orkambi        | 1 | 1 | 2016-01-26 | 1 |   | other respiratory system |
| 7  | Lumacaftor      |                |   |   |            |   |   | products                 |
| 8  | Sugammadex      | Bridion        | 1 | 1 | 2016-02-05 | 1 |   | all other therapeutic    |
| 9  |                 |                |   |   |            |   |   | products                 |
| 10 |                 |                |   |   |            |   |   | antineoplastic agents    |
| 11 | Cobimetinib     | Cotellic       | 1 | 1 | 2016-02-22 | 1 |   | antiepileptics           |
| 12 | Brivaracetam    | Brivlera       | 1 | 1 | 2016-03-09 | 1 |   | antivirals for systemic  |
| 13 | Asunaprevir     | Sunvepra       | 1 | 1 | 2016-03-09 | 1 |   | use                      |
| 14 |                 |                |   |   |            |   |   | antineoplastic agents    |
| 15 | Palbociclib     | Ibrance        | 1 | 1 | 2016-03-16 | 1 |   | lipid modifying agents   |
| 16 | Alirocumab      | Praluent       | 1 | 1 | 2016-04-11 |   | 1 | antihistamines for       |
| 17 | Bilastine       | Blexten        | 1 | 1 | 2016-04-21 | 1 |   | systemic use             |
| 18 |                 |                |   |   |            |   |   | all other therapeutic    |
| 19 | Idarucizumab    | Praxbind       | 1 | 1 | 2016-04-29 |   | 1 | products                 |
| 20 |                 |                |   |   |            |   |   | antineoplastic agents    |
| 21 | Olaparib        | Lynparza       | 1 | 1 | 2016-04-29 | 1 |   | immunosuppressants       |
| 22 | Ixekizumab      | Taltz          | 1 | 1 | 2016-05-25 |   | 1 | antineoplastic agents    |
| 23 | Osimertinib     | Tagrisso       | 1 | 1 | 2016-07-05 | 1 |   | antivirals for systemic  |
| 24 | Sofosbuvir +    | Epclusa        | 1 | 1 | 2016-07-11 | 1 |   | use                      |
| 25 | Velpatasvir     |                |   |   |            |   |   | antineoplastic agents    |
| 26 | Ixazomib        | Ninlaro        | 1 | 1 | 2016-08-04 | 1 |   | other alimentary tract   |
| 27 | Nitisinone      | MDK-Nitisinone | 1 | 1 | 2016-09-20 | 1 |   | and metabolism products  |
| 28 |                 |                |   |   |            |   |   |                          |
| 29 |                 |                |   |   |            |   |   |                          |
| 30 |                 |                |   |   |            |   |   |                          |
| 31 |                 |                |   |   |            |   |   |                          |
| 32 |                 |                |   |   |            |   |   |                          |
| 33 | Venetoclax      | Venclexta      | 1 | 1 | 2016-09-30 | 1 |   | antineoplastic agents    |
| 34 | Edoxaban        | Lixiana        | 1 | 1 | 2016-11-04 | 1 |   | antithrombotic agents    |
| 35 | Nitisinone      | Nitisinone     | 1 | 1 | 2016-11-04 | 1 |   | other alimentary tract   |
| 36 |                 |                |   |   |            |   |   | and metabolism products  |
| 37 |                 |                |   |   |            |   |   |                          |
| 38 |                 |                |   |   |            |   |   |                          |
| 39 | Daclizumab beta | Zinbryta       | 1 | 1 | 2016-12-08 |   | 1 | immunosuppressants       |
| 40 |                 |                |   |   |            |   |   |                          |
| 41 |                 |                |   |   |            |   |   |                          |
| 42 |                 |                |   |   |            |   |   |                          |
| 43 |                 |                |   |   |            |   |   |                          |
| 44 |                 |                |   |   |            |   |   |                          |
| 45 |                 |                |   |   |            |   |   |                          |
| 46 |                 |                |   |   |            |   |   |                          |
| 47 |                 |                |   |   |            |   |   |                          |

1  
2  
3  
4  
5  
6  
7  
8  
9  
10  
11  
12  
13  
14  
15  
16  
17  
18  
19  
20  
21  
22  
23  
24  
25  
26  
27  
28  
29  
30  
31  
32  
33  
34  
35  
36  
37  
38  
39  
40  
41  
42  
43  
44  
45  
46  
47

|            |         |    |     |     |     |            |    |     |                                                |
|------------|---------|----|-----|-----|-----|------------|----|-----|------------------------------------------------|
| Nitisinone | Orfadin | 1  |     | 1   |     | 2016-12-13 | 1  |     | other alimentary tract and metabolism products |
| Ivabradine | Lancora |    | 1   | 1   |     | 2016-12-23 | 1  |     | cardiac therapy                                |
|            |         | 55 | 454 | 379 | 130 |            | 42 | 286 | 99                                             |

**\*Prescrire evaluations as of February 20, 2018; PMPRB evaluations as of December 31, 2016; Prescrire ratings - offers an advantage, possibly helpful, nothing new, not acceptable; PMPRB ratings - category 3 = moderate, little or no improvement (prior to 2010), slight or no improvement, moderate improvement - primary, moderate improvement - secondary (2010 onwards)**

For peer review only

**Supplementary Table 2: All drugs approved between 1995-2016 that did not receive therapeutic assessments**

| Generic name                                | Brand name   | Review status |          |                                      | Notice of compliance or Notice of compliance with conditions date | Small molecule | Biologic | ATC group (second level)                          |
|---------------------------------------------|--------------|---------------|----------|--------------------------------------|-------------------------------------------------------------------|----------------|----------|---------------------------------------------------|
|                                             |              | Standard      | Priority | Notice of compliance with conditions |                                                                   |                |          |                                                   |
| Levocarnitine                               | Carnitor     |               | 1        |                                      | 1995-01-19                                                        |                |          | other alimentary tract and metabolism products    |
| Losoxantrone                                | Bianda       | 1             |          |                                      | 1995-02-19                                                        |                |          | antineoplastic agents                             |
| Carvedilol                                  | Dilatrend    | 1             |          |                                      | 1995-02-27                                                        |                |          | beta blocking agents                              |
| Carvedilol                                  | Kredex       | 1             |          |                                      | 1995-02-27                                                        |                |          | beta blocking agents                              |
| Halofantrine                                | Halfan       | 1             |          |                                      | 1995-03-29                                                        |                |          | antiprotozoals                                    |
| Ceftibuten                                  | Cedax        | 1             |          |                                      | 1995-05-09                                                        |                |          | antibacterials for systemic use                   |
| Sermorelin                                  | Geref        | 1             |          |                                      | 1995-06-08                                                        |                |          | pituitary and hypothalamic hormones and analogues |
| Tetrabenazine                               | Nitoman      | 1             |          |                                      | 1995-12-29                                                        |                |          | other nervous system drugs                        |
| Iron dextran                                | Dexferrum    |               | 1        |                                      | 1996-01-09                                                        |                |          | antianemic preparations                           |
| Rimexolone                                  | Vexol        | 1             |          |                                      | 1996-01-17                                                        |                |          | corticosteroids for systemic use                  |
| Measles virus vaccine/Rubella virus vaccine | Moru-Viraten |               | 1        |                                      | 1996-02-26                                                        |                |          | vaccines                                          |
| Ferumoxsil                                  | Gastromark   | 1             |          |                                      | 1996-03-15                                                        |                |          | contrast media                                    |
| Saquinavir                                  | Saquinavir   |               | 1        |                                      | 1996-03-22                                                        |                |          | antivirals for systemic use                       |
| Pantoprazole                                | Panto-Byk    | 1             |          |                                      | 1996-07-05                                                        |                |          | drugs for acid related disorders                  |
| Dexfenfluramine                             | Redux        | 1             |          |                                      | 1996-07-29                                                        |                |          | antiobesity preparations                          |
| Palmitic acid/Galactose                     | Levovist     | 1             |          |                                      | 1996-07-31                                                        |                |          | contrast media                                    |
| Fleroxacin                                  | Megalone     | 1             |          |                                      | 1996-08-21                                                        |                |          | antibacterials for systemic use                   |



|    |                       |                    |   |   |            |                                 |
|----|-----------------------|--------------------|---|---|------------|---------------------------------|
| 1  |                       |                    |   |   |            |                                 |
| 2  |                       |                    |   |   |            |                                 |
| 3  | Reviparin             | Clivarine          | 1 |   | 1996-09-10 | antithrombotic agents           |
| 4  | Diphtheria, tetanus & | Infanrix           |   | 1 | 1996-12-17 | vaccines                        |
| 5  | acellular pertussis   |                    |   |   |            |                                 |
| 6  | vaccine               |                    |   |   |            |                                 |
| 7  | Cisatracurium         | Nimbex injectior   | 1 |   | 1996-12-18 | muscle relaxants                |
| 8  | Remifentanil          | Ultiva injection   | 1 |   | 1996-12-24 | anesthetics                     |
| 9  | Tiludronate           | Skelid             | 1 |   | 1997-02-06 | drugs for treatment of bone     |
| 10 |                       |                    |   |   |            | disease                         |
| 11 | Tazarotene            | Tazorac Gel        | 1 |   | 1997-02-25 | antipsoriatics                  |
| 12 | Praziquantel          | Biltricide         | 1 |   | 1997-03-07 | anthelmintics                   |
| 13 | Molgramostim          | Leucomax           |   | 1 | 1997-03-10 | immunostimulants                |
| 14 | Fosphenytoin          | Cerebyx injectioi  | 1 |   | 1997-03-20 | antiepileptics                  |
| 15 | Butenafine            | Dr. Scholl's athle | 1 |   | 1997-04-15 | antifungals for dermatological  |
| 16 |                       |                    |   |   |            | use                             |
| 17 | Troglitazone          | Rezulin            |   | 1 | 1997-05-09 | drugs used in diabetes          |
| 18 | Trandolapril          | Odrik              | 1 |   | 1997-05-15 | agents acting on the renin-     |
| 19 |                       |                    |   |   |            | angiotensin system              |
| 20 | Follitropin alpha     | Gonal-F            | 1 |   | 1997-06-06 | sex hormones and modulators     |
| 21 |                       |                    |   |   |            | of the genital system           |
| 22 | Kit for preparation   | Myoscint           | 1 |   | 1997-07-02 | diagnostic radiopharmaceuticals |
| 23 | of indium in 111      |                    |   |   |            |                                 |
| 24 | imciromab             |                    |   |   |            |                                 |
| 25 | pentetate             |                    |   |   |            |                                 |
| 26 | Cytomegalovirus       | Cytogam            | 1 |   | 1997-08-01 | immune sera and                 |
| 27 | immune globulin       |                    |   |   |            | immunoglobulins                 |
| 28 | Oxiconazole           | Oxizole            | 1 |   | 1997-08-08 | antifungals for dermatological  |
| 29 |                       |                    |   |   |            | use                             |
| 30 | Respiratory           | Respigam           |   | 1 | 1997-08-20 | immune sera and                 |
| 31 | syncytial virus       |                    |   |   |            | immunoglobulins                 |
| 32 | immune globulin       |                    |   |   |            |                                 |
| 33 | Arcitumomab           | CEA-Scan           | 1 |   | 1997-09-16 | diagnostic radiopharmaceuticals |
| 34 |                       |                    |   |   |            |                                 |
| 35 |                       |                    |   |   |            |                                 |
| 36 |                       |                    |   |   |            |                                 |
| 37 |                       |                    |   |   |            |                                 |
| 38 |                       |                    |   |   |            |                                 |
| 39 |                       |                    |   |   |            |                                 |
| 40 |                       |                    |   |   |            |                                 |
| 41 |                       |                    |   |   |            |                                 |
| 42 |                       |                    |   |   |            |                                 |
| 43 |                       |                    |   |   |            |                                 |
| 44 |                       |                    |   |   |            |                                 |
| 45 |                       |                    |   |   |            |                                 |
| 46 |                       |                    |   |   |            |                                 |
| 47 |                       |                    |   |   |            |                                 |

|    |                                       |                   |   |            |   |                                   |
|----|---------------------------------------|-------------------|---|------------|---|-----------------------------------|
| 1  |                                       |                   |   |            |   |                                   |
| 2  |                                       |                   |   |            |   |                                   |
| 3  | Olopatadine                           | Patanol           | 1 | 1997-09-16 |   | ophthalmologicals                 |
| 4  |                                       |                   |   |            |   |                                   |
| 5  | Pegaspargase                          | Oncaspar          | 1 | 1997-11-19 |   | antineoplastic agents             |
| 6  |                                       |                   |   |            |   |                                   |
| 7  | Anagrelide as hydrochloride           | Agrylin           | 1 | 1997-11-19 |   | antineoplastic agents             |
| 8  |                                       |                   |   |            |   |                                   |
| 9  | Nadroparin                            | Fraxiparine       | 1 | 1997-11-27 |   | antithrombotic agents             |
| 10 | Bicisate                              | OncoScint         | 1 | 1998-01-16 |   | diagnostic radiopharmaceuticals   |
| 11 |                                       |                   |   |            |   |                                   |
| 12 | Gadolinium (III)                      | Gadolite          | 1 | 1998-04-08 |   | contrast media                    |
| 13 | Lexidronam                            | Quadramet         | 1 | 1998-06-22 |   | therapeutic radiopharmaceuticals  |
| 14 |                                       |                   |   |            |   |                                   |
| 15 | Miglitol                              | Glyset            | 1 | 1998-07-22 |   | drugs used in diabetes            |
| 16 |                                       |                   |   |            |   |                                   |
| 17 | Lipoprotein-OspA antigen              | Lymerix           | 1 | 1998-12-02 |   | vaccines                          |
| 18 |                                       |                   |   |            |   |                                   |
| 19 | recombinant                           |                   |   |            |   |                                   |
| 20 | Toremifene                            | Fareston          | 1 | 1998-12-14 |   | endocrine therapy                 |
| 21 | Cefdinir                              | Omnicef           | 1 | 1999-02-05 |   | antibacterials for systemic use   |
| 22 |                                       |                   |   |            |   |                                   |
| 23 | Methacholine                          | Methacoline       | 1 | 1999-02-25 |   | diagnostic agents                 |
| 24 |                                       |                   |   |            |   |                                   |
| 25 | Fosfomycin                            | Monurol           | 1 | 1999-04-12 |   | antibacterials for systemic use   |
| 26 |                                       |                   |   |            |   |                                   |
| 27 | Alitretinoin                          | Panretin          | 1 | 1999-06-11 |   | other dermatological preparations |
| 28 |                                       |                   |   |            |   |                                   |
| 29 | Ioxilan                               | Oxilan            | 1 | 1999-10-05 |   | contrast media                    |
| 30 | Mangafodipir                          | Teslascan         | 1 | 2000-02-09 | 1 | contrast media                    |
| 31 |                                       |                   |   |            |   |                                   |
| 32 | Sevelamer                             | Renagel           | 1 | 2000-02-24 | 1 | all other therapeutic products    |
| 33 |                                       |                   |   |            |   |                                   |
| 34 | Valrubicin                            | Valstar           | 1 | 2000-07-04 | 1 | antineoplastic agents             |
| 35 | Ibutilide                             | Corvert injection | 1 | 2000-07-14 | 1 | cardiac therapy                   |
| 36 | Fomepizole                            | Antizol           | 1 | 2000-11-30 | 1 | all other therapeutic products    |
| 37 | Amlexanox                             | Apthera           | 1 | 2000-12-11 | 1 | stomatological preparations       |
| 38 |                                       |                   |   |            |   |                                   |
| 39 | Tegafur/uracil and leucovorin calcium | Orzel             | 1 | 2001-04-06 | 1 | antineoplastic agents             |
| 40 |                                       |                   |   |            |   |                                   |
| 41 | Argatroban                            | Argatroban        | 1 | 2001-06-04 | 1 | antithrombotic agents             |
| 42 |                                       |                   |   |            |   |                                   |
| 43 |                                       |                   |   |            |   |                                   |
| 44 |                                       |                   |   |            |   |                                   |
| 45 |                                       |                   |   |            |   |                                   |
| 46 |                                       |                   |   |            |   |                                   |
| 47 |                                       |                   |   |            |   |                                   |

|    |                     |               |   |   |            |   |                                   |
|----|---------------------|---------------|---|---|------------|---|-----------------------------------|
| 1  |                     |               |   |   |            |   |                                   |
| 2  |                     |               |   |   |            |   |                                   |
| 3  | Aminolevulinic acid | Levulan       | 1 |   | 2001-06-20 | 1 | antineoplastic agents             |
| 4  | Infliximab          | Remicade      |   | 1 | 2001-09-27 |   | 1 immunosuppressants              |
| 5  |                     |               |   |   |            |   |                                   |
| 6  | Levobupivacaine     | Chirocaine    | 1 |   | 2002-03-20 | 1 | anesthetics                       |
| 7  | Unoprostone         | Rescula       | 1 |   | 2002-04-03 | 1 | ophthalmologicals                 |
| 8  | isopropyl           |               |   |   |            |   |                                   |
| 9  | Thyrotropin         | Thyrogen      | 1 |   | 2002-05-31 |   | 1 diagnostic agents               |
| 10 | Anti-thymocyte      | Thymoglobulin | 1 |   | 2002-11-20 |   | 1 immunosuppressants              |
| 11 | globulin            |               |   |   |            |   |                                   |
| 12 | Dextromethylpheni   | Attenade      | 1 |   | 2003-08-12 | 1 | psychoanaleptics                  |
| 13 | date                |               |   |   |            |   |                                   |
| 14 | Sulfur Hexafluoride | Sonovue       | 1 |   | 2004-02-12 | 1 | contrast media                    |
| 15 | Yttrium-90          | Yttrium-90    |   | 1 | 2004-12-02 |   | 1 therapeutic                     |
| 16 |                     |               |   |   |            |   | radiopharmaceuticals              |
| 17 | Choriogonadotropin  | Ovidrel       | 1 |   | 2004-12-16 |   | 1 sex hormones and modulators     |
| 18 | Alfa                |               |   |   |            |   | of the genital system             |
| 19 | Sulesomab           | Leukoscan     | 1 |   | 2005-01-17 |   | 1 diagnostic radiopharmaceuticals |
| 20 |                     |               |   |   |            |   |                                   |
| 21 | Tositumomab         | Bexxar        |   | 1 | 2005-08-18 |   | 1 therapeutic                     |
| 22 |                     |               |   |   |            |   | radiopharmaceuticals              |
| 23 | Nitric oxide        | Inomax        |   | 1 | 2005-09-23 | 1 | other respiratory system          |
| 24 |                     |               |   |   |            |   | products                          |
| 25 | F-                  | Cantrace      |   | 1 | 2006-07-27 |   | 1 diagnostic radiopharmaceuticals |
| 26 | Fluorodeoxyglucose  |               |   |   |            |   |                                   |
| 27 | Lumiracoxib         | Prexige       | 1 |   | 2006-11-02 | 1 | antiinflammatory and              |
| 28 |                     |               |   |   |            |   | antirheumatic products            |
| 29 | Nelarabine          | Atriance      |   | 1 | 2007-09-22 | 1 | antineoplastic agents             |
| 30 | Rotavirus vaccine   | Rotarix       | 1 |   | 2007-10-09 |   | 1 vaccines                        |
| 31 |                     |               |   |   |            |   |                                   |
| 32 | Retapamulin         | Altargo       | 1 |   | 2008-03-19 | 1 | antibiotics and                   |
| 33 |                     |               |   |   |            |   | chemotherapeutics for             |
| 34 |                     |               |   |   |            |   | dermatological use                |
| 35 |                     |               |   |   |            |   |                                   |
| 36 |                     |               |   |   |            |   |                                   |
| 37 |                     |               |   |   |            |   |                                   |
| 38 |                     |               |   |   |            |   |                                   |
| 39 |                     |               |   |   |            |   |                                   |
| 40 |                     |               |   |   |            |   |                                   |
| 41 |                     |               |   |   |            |   |                                   |
| 42 |                     |               |   |   |            |   |                                   |
| 43 |                     |               |   |   |            |   |                                   |
| 44 |                     |               |   |   |            |   |                                   |
| 45 |                     |               |   |   |            |   |                                   |
| 46 |                     |               |   |   |            |   |                                   |
| 47 |                     |               |   |   |            |   |                                   |

|    |                      |                   |   |            |   |   |                                 |
|----|----------------------|-------------------|---|------------|---|---|---------------------------------|
| 1  |                      |                   |   |            |   |   |                                 |
| 2  |                      |                   |   |            |   |   |                                 |
| 3  | Methoxy              | Mircera           | 1 | 2008-03-31 |   | 1 | antianemic preparations         |
| 4  | Polyethylene glycol- |                   |   |            |   |   |                                 |
| 5  | epoetin beta         |                   |   |            |   |   |                                 |
| 6  | Telavancin           | Vibativ           | 1 | 2009-09-29 | 1 |   | antibacterials for systemic use |
| 7  | Human C1 esterase    | Berinert          | 1 | 2010-05-31 |   | 1 | other hematological agents      |
| 8  | inhibitor            |                   |   |            |   |   |                                 |
| 9  | Influenza vaccine    | Flumist           | 1 | 2010-06-22 |   | 1 | vaccines                        |
| 10 | Zucapsaicin          | Civanex (Zuacta   | 1 | 2010-07-15 | 1 |   | topical products for joint and  |
| 11 |                      |                   |   |            |   |   | muscular pain                   |
| 12 |                      |                   |   |            |   |   |                                 |
| 13 | Clevidipine          | Cleviprex         | 1 | 2011-04-15 | 1 |   | calcium channel blockers        |
| 14 | Rubidium chloride rb | Ruby-fill         |   | 2011-09-20 |   | 1 | diagnostic radiopharmaceuticals |
| 15 | 82                   |                   | 1 |            |   |   |                                 |
| 16 | Doxycycline          | Efracea           | 1 | 2011-11-14 | 1 |   | antibacterials for systemic use |
| 17 | Ferumoxytol          | Feraheme          | 1 | 2011-12-08 | 1 |   | antianemic preparations         |
| 18 | Remestemcel-L        | Prochymal         |   | 2012-05-17 |   | 1 | unassigned                      |
| 19 | Ezogabine            | Potiga            | 1 | 2012-10-08 | 1 |   | antiepileptics                  |
| 20 | Haemagglutinin-      | Arepranrix H5N1   | 1 | 2013-02-13 |   | 1 | vaccines                        |
| 21 | Strain A             |                   |   |            |   |   |                                 |
| 22 | Olodaterol           | Striverdi respim: | 1 | 2013-06-11 | 1 |   | drugs for obstructive airway    |
| 23 |                      |                   |   |            |   |   | diseases                        |
| 24 | Difluprednate        | Durezol           | 1 | 2013-11-04 | 1 |   | corticosteroids, dermatological |
| 25 |                      |                   |   |            |   |   | preparations                    |
| 26 | Tafluprost           | Saflutan          | 1 | 2014-05-26 | 1 |   | ophthalmologicals               |
| 27 | Elosulfase Alfa      | Vimizim           |   | 2014-07-02 |   | 1 | other alimentary tract and      |
| 28 |                      |                   | 1 |            |   |   | metabolism products             |
| 29 | Turoctocog alfa      | Zonovate          | 1 | 2014-12-08 |   | 1 | antihemorrhagics                |
| 30 | Bromfenac            | Prolensa          | 1 | 2015-03-26 | 1 |   | ophthalmologicals               |
| 31 | Albiglutide          | Eperzan           | 1 | 2015-07-15 |   | 1 | drugs used in diabetes          |
| 32 | Vilazodone           | Viibryd           | 1 | 2015-07-16 | 1 |   | psychoanaleptics                |
| 33 | Polidocanol          | Varithena         | 1 | 2015-08-04 | 1 |   | vasoprotectives                 |
| 34 | Peginterferon Beta-  | Plegrixy          | 1 | 2015-08-10 |   | 1 | immunostimulants                |
| 35 | 1A                   |                   |   |            |   |   |                                 |
| 36 |                      |                   |   |            |   |   |                                 |
| 37 |                      |                   |   |            |   |   |                                 |
| 38 |                      |                   |   |            |   |   |                                 |
| 39 |                      |                   |   |            |   |   |                                 |
| 40 |                      |                   |   |            |   |   |                                 |
| 41 |                      |                   |   |            |   |   |                                 |
| 42 |                      |                   |   |            |   |   |                                 |
| 43 |                      |                   |   |            |   |   |                                 |
| 44 |                      |                   |   |            |   |   |                                 |
| 45 |                      |                   |   |            |   |   |                                 |
| 46 |                      |                   |   |            |   |   |                                 |
| 47 |                      |                   |   |            |   |   |                                 |

|    |                      |            |   |            |   |   |                                 |
|----|----------------------|------------|---|------------|---|---|---------------------------------|
| 1  |                      |            |   |            |   |   |                                 |
| 2  |                      |            |   |            |   |   |                                 |
| 3  | Antihemophilic       | Obizur     | 1 | 2015-10-14 |   | 1 | antihemorrhagics                |
| 4  | Factor               |            |   |            |   |   |                                 |
| 5  | (Recombinant)        |            |   |            |   |   |                                 |
| 6  | Porcine Sequence     |            |   |            |   |   |                                 |
| 7  | Lubiprostone         | Amitiza    | 1 | 2015-10-14 | 1 |   | drugs for constipation          |
| 8  | Albutrepenonacog     | Idelvion   | 1 | 2016-01-26 |   | 1 | antihemorrhagics                |
| 9  | Alfa                 |            |   |            |   |   |                                 |
| 10 | Finafloxacin         | Xtoro      | 1 | 2016-03-11 |   | 1 | otologicals                     |
| 11 | Glycerol             | Ravicti    | 1 | 2016-03-16 |   | 1 | other alimentary tract and      |
| 12 | Phenylbutyrate       |            |   |            |   |   | metabolism products             |
| 13 | Vorapaxar            | Zontivity  | 1 | 2016-05-13 |   | 1 | antithrombotic agents           |
| 14 | Elotuzumab           | Empliciti  | 1 | 2016-06-21 |   | 1 | antineoplastic agents           |
| 15 | Daratumumab          | Darzalex   | 1 | 2016-06-29 |   | 1 | antineoplastic agents           |
| 16 | Rupatadine           | Rupall     | 1 | 2016-07-20 |   | 1 | antihistamines for systemic use |
| 17 |                      |            |   |            |   |   |                                 |
| 18 | Reslizumab           | Cinqair    | 1 | 2016-07-20 |   | 1 | drugs for obstructive airway    |
| 19 |                      |            |   |            |   |   | diseases                        |
| 20 | Bepotastine          | Bepreve    | 1 | 2016-07-27 |   | 1 | antihistamines for systemic use |
| 21 |                      |            |   |            |   |   |                                 |
| 22 | Alectinib            | Alecensaro | 1 | 2016-09-29 |   | 1 | antineoplastic agents           |
| 23 | Antihemophilic       | Adynovate  | 1 | 2016-11-17 |   | 1 | antihemorrhagics                |
| 24 | Factor               |            |   |            |   |   |                                 |
| 25 | (Recombinant),       |            |   |            |   |   |                                 |
| 26 | PFGvlated            |            |   |            |   |   |                                 |
| 27 | Gadoterate           | Dotarem    | 1 | 2016-11-25 |   | 1 | contrast media                  |
| 28 | Meglumine            |            |   |            |   |   |                                 |
| 29 | Botulinium antitoxin | BAT        | 1 | 2016-12-08 |   | 1 | immune sera and                 |
| 30 | serotypes A, B,C, D, |            |   |            |   |   | immunoglobulins                 |
| 31 | E, F and G           |            |   |            |   |   |                                 |
| 32 | Lonococog Alfa       | Afstyla    | 1 | 2016-12-12 |   | 1 | antihemorrhagics                |
| 33 |                      |            |   |            |   |   |                                 |
| 34 |                      |            |   |            |   |   |                                 |
| 35 |                      |            |   |            |   |   |                                 |
| 36 |                      |            |   |            |   |   |                                 |
| 37 |                      |            |   |            |   |   |                                 |
| 38 |                      |            |   |            |   |   |                                 |
| 39 |                      |            |   |            |   |   |                                 |
| 40 |                      |            |   |            |   |   |                                 |
| 41 |                      |            |   |            |   |   |                                 |
| 42 |                      |            |   |            |   |   |                                 |
| 43 |                      |            |   |            |   |   |                                 |
| 44 |                      |            |   |            |   |   |                                 |
| 45 |                      |            |   |            |   |   |                                 |
| 46 |                      |            |   |            |   |   |                                 |
| 47 |                      |            |   |            |   |   |                                 |

## STROBE Statement—checklist of items that should be included in reports of observational studies

|                          | Item No | Recommendation                                                                                                                                                                                                                                                                                                                                                                                                                                                         | Location in study             |
|--------------------------|---------|------------------------------------------------------------------------------------------------------------------------------------------------------------------------------------------------------------------------------------------------------------------------------------------------------------------------------------------------------------------------------------------------------------------------------------------------------------------------|-------------------------------|
| Title and abstract       | 1       | (a) Indicate the study's design with a commonly used term in the title or the abstract                                                                                                                                                                                                                                                                                                                                                                                 | Title, page 1                 |
|                          |         | (b) Provide in the abstract an informative and balanced summary of what was done and what was found                                                                                                                                                                                                                                                                                                                                                                    | Structured summary, pages 2-3 |
| <b>Introduction</b>      |         |                                                                                                                                                                                                                                                                                                                                                                                                                                                                        |                               |
| Background/rationale     | 2       | Explain the scientific background and rationale for the investigation being reported                                                                                                                                                                                                                                                                                                                                                                                   | Introduction, page 5          |
| Objectives               | 3       | State specific objectives, including any prespecified hypotheses                                                                                                                                                                                                                                                                                                                                                                                                       | Introduction, page 6          |
| <b>Methods</b>           |         |                                                                                                                                                                                                                                                                                                                                                                                                                                                                        |                               |
| Study design             | 4       | Present key elements of study design early in the paper                                                                                                                                                                                                                                                                                                                                                                                                                | Methods, pages 6-8            |
| Setting                  | 5       | Describe the setting, locations, and relevant dates, including periods of recruitment, exposure, follow-up, and data collection                                                                                                                                                                                                                                                                                                                                        | Methods, pages 6-8, 10        |
| Participants             | 6       | (a) <i>Cohort study</i> —Give the eligibility criteria, and the sources and methods of selection of participants. Describe methods of follow-up<br><i>Case-control study</i> —Give the eligibility criteria, and the sources and methods of case ascertainment and control selection. Give the rationale for the choice of cases and controls<br><i>Cross-sectional study</i> —Give the eligibility criteria, and the sources and methods of selection of participants | Methods, pages 6, 7           |
|                          |         | (b) <i>Cohort study</i> —For matched studies, give matching criteria and number of exposed and unexposed<br><i>Case-control study</i> —For matched studies, give matching criteria and the number of controls per case                                                                                                                                                                                                                                                 |                               |
| Variables                | 7       | Clearly define all outcomes, exposures, predictors, potential confounders, and effect modifiers. Give diagnostic criteria, if applicable                                                                                                                                                                                                                                                                                                                               | Methods, pages 8-10           |
| Data sources/measurement | 8*      | For each variable of interest, give sources of data and details of methods of assessment (measurement). Describe comparability of assessment methods if there is more than one group                                                                                                                                                                                                                                                                                   | Methods, pages 7-10           |
| Bias                     | 9       | Describe any efforts to address potential sources of bias                                                                                                                                                                                                                                                                                                                                                                                                              | Not relevant                  |
| Study size               | 10      | Explain how the study size was arrived at                                                                                                                                                                                                                                                                                                                                                                                                                              | Not relevant                  |
| Quantitative variables   | 11      | Explain how quantitative variables were handled in the analyses. If applicable, describe which groupings were chosen and why                                                                                                                                                                                                                                                                                                                                           | Not relevant                  |
| Statistical methods      | 12      | (a) Describe all statistical methods, including those used to control for confounding                                                                                                                                                                                                                                                                                                                                                                                  | Methods, page 10              |
|                          |         | (b) Describe any methods used to examine subgroups and interactions                                                                                                                                                                                                                                                                                                                                                                                                    | Methods, pages 9, 10          |

|                   |     |                                                                                                                                                                                                              |                      |
|-------------------|-----|--------------------------------------------------------------------------------------------------------------------------------------------------------------------------------------------------------------|----------------------|
|                   |     | (c) Explain how missing data were addressed                                                                                                                                                                  | Not relevant         |
|                   |     | (d) <i>Cohort study</i> —If applicable, explain how loss to follow-up was addressed                                                                                                                          | Not relevant         |
|                   |     | <i>Case-control study</i> —If applicable, explain how matching of cases and controls was addressed                                                                                                           |                      |
|                   |     | <i>Cross-sectional study</i> —If applicable, describe analytical methods taking account of sampling strategy                                                                                                 |                      |
|                   |     | (e) Describe any sensitivity analyses                                                                                                                                                                        | Not relevant         |
| <b>Results</b>    |     |                                                                                                                                                                                                              |                      |
| Participants      | 13* | (a) Report numbers of individuals at each stage of study—eg numbers potentially eligible, examined for eligibility, confirmed eligible, included in the study, completing follow-up, and analysed            | Results, pages 10-12 |
|                   |     | (b) Give reasons for non-participation at each stage                                                                                                                                                         |                      |
|                   |     | (c) Consider use of a flow diagram                                                                                                                                                                           | Not relevant         |
| Descriptive data  | 14* | (a) Give characteristics of study participants (eg demographic, clinical, social) and information on exposures and potential confounders                                                                     | Not relevant         |
|                   |     | (b) Indicate number of participants with missing data for each variable of interest                                                                                                                          | Results, page 13     |
|                   |     | (c) <i>Cohort study</i> —Summarise follow-up time (eg, average and total amount)                                                                                                                             | Not relevant         |
| Outcome data      | 15* | <i>Cohort study</i> —Report numbers of outcome events or summary measures over time                                                                                                                          | Results, pages 11-15 |
|                   |     | <i>Case-control study</i> —Report numbers in each exposure category, or summary measures of exposure                                                                                                         |                      |
|                   |     | <i>Cross-sectional study</i> —Report numbers of outcome events or summary measures                                                                                                                           |                      |
| Main results      | 16  | (a) Give unadjusted estimates and, if applicable, confounder-adjusted estimates and their precision (eg, 95% confidence interval). Make clear which confounders were adjusted for and why they were included |                      |
|                   |     | (b) Report category boundaries when continuous variables were categorized                                                                                                                                    | Not relevant         |
|                   |     | (c) If relevant, consider translating estimates of relative risk into absolute risk for a meaningful time period                                                                                             | Not relevant         |
| Other analyses    | 17  | Report other analyses done—eg analyses of subgroups and interactions, and sensitivity analyses                                                                                                               | Not relevant         |
| <b>Discussion</b> |     |                                                                                                                                                                                                              |                      |
| Key results       | 18  | Summarise key results with reference to study objectives                                                                                                                                                     | Discussion, page 16  |
| Limitations       | 19  | Discuss limitations of the study, taking into account sources of potential bias or imprecision. Discuss both direction and magnitude of any potential bias                                                   | Limitations, page 19 |
| Interpretation    | 20  | Give a cautious overall interpretation of results considering objectives, limitations, multiplicity of analyses, results from similar studies, and other relevant evidence                                   | Conclusion, page 19  |

1  
2 Generalisability 21 Discuss the generalisability (external validity) of the study Not relevant  
3 results

---

4 **Other information**

5 Funding 22 Give the source of funding and the role of the funders for the Page 20  
6 present study and, if applicable, for the original study on which  
7 the present article is based  
8

9  
10 \*Give information separately for cases and controls in case-control studies and, if applicable, for exposed and  
11 unexposed groups in cohort and cross-sectional studies.  
12

13  
14 **Note:** An Explanation and Elaboration article discusses each checklist item and gives methodological background and  
15 published examples of transparent reporting. The STROBE checklist is best used in conjunction with this article (freely  
16 available on the Web sites of PLoS Medicine at <http://www.plosmedicine.org/>, Annals of Internal Medicine at  
17 <http://www.annals.org/>, and Epidemiology at <http://www.epidem.com/>). Information on the STROBE Initiative is  
18 available at [www.strobe-statement.org](http://www.strobe-statement.org).  
19  
20  
21  
22  
23  
24  
25  
26  
27  
28  
29  
30  
31  
32  
33  
34  
35  
36  
37  
38  
39  
40  
41  
42  
43  
44  
45  
46  
47  
48  
49  
50  
51  
52  
53  
54  
55  
56  
57  
58  
59  
60
