# Supplementary material for: Health Canada’s use of expedited review pathways and therapeutic innovation, 1995–2016: cross-sectional analysis
Source: PubMed Central journal article supplement — BMJ Open. 2018 Aug 30;8(8):e023605. doi: 10.1136/bmjopen-2018-023605 (PMC6119438; doi:10.1136/bmjopen-2018-023605), 2018-08-30
Supplement: bmjopen-2018-023605supp001.pdf [file bmjopen-2018-023605supp001.pdf]

**Supplementary Table 1: All drugs approved between 1995-2016 that received therapeutic assessments from Patented Medicine Prices Review Board and/or La revue Prescrire\***

| Generic name     | Brand name     | PMPRB<br>breakthrough,<br>substantial<br>improvement<br>and/or<br>Prescrire<br>bravo, a real<br>advance | PMPRB<br>and/or<br>Prescrire no<br>significant<br>therapeutic<br>innovation† | Review status<br>Standard | Priority | Notice of<br>compliance<br>with<br>conditions | Notice of<br>compliance<br>or notice of<br>compliance<br>with<br>conditions<br>date | Small<br>molecule | Biologic | ATC group (second<br>level)              |
|------------------|----------------|---------------------------------------------------------------------------------------------------------|------------------------------------------------------------------------------|---------------------------|----------|-----------------------------------------------|-------------------------------------------------------------------------------------|-------------------|----------|------------------------------------------|
| Adapalene        | Differin       |                                                                                                         | 1                                                                            | 1                         |          |                                               | 1995-01-24                                                                          |                   |          | anti-acne preparation                    |
| Dexrazoxane      | Zinecard       | 1                                                                                                       |                                                                              | 1                         |          |                                               | 1995-02-07                                                                          |                   |          | all other therapeutic<br>products        |
| Bambuterol       | Bambec         |                                                                                                         | 1                                                                            | 1                         |          |                                               | 1995-02-07                                                                          |                   |          | drugs for obstructive<br>airway diseases |
| Naltrexone       | Revia          |                                                                                                         | 1                                                                            | 1                         |          |                                               | 1995-03-23                                                                          |                   |          | other nervous system<br>drugs            |
| Cefprozil        | Cefzil         |                                                                                                         | 1                                                                            | 1                         |          |                                               | 1995-03-29                                                                          |                   |          | antibacterials for                       |
| Zuclopenthixol   | Clopixol       |                                                                                                         | 1                                                                            | 1                         |          |                                               | 1995-04-24                                                                          |                   |          | psycholeptics                            |
| Zuclopenthixol   | Clopixol       |                                                                                                         | 1                                                                            | 1                         |          |                                               | 1995-04-24                                                                          |                   |          | psycholeptics                            |
| Zuclopenthixol   | acuphase       |                                                                                                         |                                                                              |                           |          |                                               |                                                                                     |                   |          |                                          |
| Zuclopenthixol   | Clopixol depot |                                                                                                         | 1                                                                            | 1                         |          |                                               | 1995-04-24                                                                          |                   |          | psycholeptics                            |
| Lansoprazole     | Prevacid       |                                                                                                         | 1                                                                            | 1                         |          |                                               | 1995-05-12                                                                          |                   |          | drugs for acid related<br>disorders      |
| Cefepime         | Maxipime       |                                                                                                         | 1                                                                            | 1                         |          |                                               | 1995-06-02                                                                          |                   |          | antibacterials for<br>systemic use       |
| Interferon Beta- | Betaseron      |                                                                                                         | 1                                                                            |                           | 1        |                                               | 1995-07-19                                                                          |                   |          | immunostimulants                         |
| Famciclovir      | Famvir         |                                                                                                         | 1                                                                            | 1                         |          |                                               | 1995-07-31                                                                          |                   |          | antivirals for systemic<br>use           |
| Cefpodoxime      | Orelox         |                                                                                                         | 1                                                                            | 1                         |          |                                               | 1995-08-22                                                                          |                   |          | antibacterials for<br>svstemic use       |
| Sevoflurane      | Sevorane       |                                                                                                         | 1                                                                            | 1                         |          |                                               | 1995-09-18                                                                          |                   |          | anesthetics                              |

|                                      |              |   |   |   |   |            |                                               |
|--------------------------------------|--------------|---|---|---|---|------------|-----------------------------------------------|
| Losartan                             | Cozaar       |   | 1 | 1 |   | 1995-09-28 | agents acting on the renin-angiotensin system |
| Iotrolan                             | Osmovist 280 |   | 1 | 1 |   | 1995-10-04 | contrast media                                |
| Bicalutamide                         | Casodex      |   | 1 | 1 |   | 1995-11-02 | endocrine therapy                             |
| Acarbose                             | Prandase     |   | 1 | 1 |   | 1995-11-15 | drugs used in diabetes                        |
| Mycophenolate                        | Cellcept     |   | 1 | 1 |   | 1995-11-15 | immunosuppressants                            |
| Tacrolimus                           | Prograf      |   | 1 |   | 1 | 1995-12-06 | immunosuppressants                            |
| Lamivudine                           | 3TC          |   | 1 |   | 1 | 1995-12-08 | antivirals for systemic use                   |
| Alendronate                          | Fosamax      |   | 1 | 1 |   | 1995-12-20 | drugs for treatment of bone disease           |
| Stavudine                            | Zerit        |   | 1 | 1 |   | 1996-03-26 | antivirals for systemic use                   |
| Acellular pertussis vaccine adsorbed | Acel-P       |   | 1 |   | 1 | 1996-03-29 | vaccines                                      |
| Dorzolamide                          | Trusopt      |   | 1 | 1 |   | 1996-04-25 | ophthalmologicals                             |
| Amifostine                           | Ethyol       | 1 |   |   | 1 | 1996-04-25 | all other therapeutic products                |
| Valacyclovir                         | Valtrex      |   | 1 | 1 |   | 1996-05-01 | antivirals for systemic use                   |
| Quinagolide                          | Norprolac    |   | 1 | 1 |   | 1996-06-25 | other gynecologicals                          |
| Meropenem                            | Merrem       |   | 1 | 1 |   | 1996-07-02 | antibacterials for systemic use               |
| Abciximab                            | Reopro       | 1 |   | 1 |   | 1996-07-04 | antithrombotic agents                         |
| Anastrozole                          | Arimidex     |   | 1 | 1 |   | 1996-08-01 | endocrine therapy                             |
| Ritonavir                            | Norvir       | 1 |   |   | 1 | 1996-08-14 | antivirals for systemic use                   |
| Raltitrexed                          | Tomudex      |   | 1 |   | 1 | 1996-09-12 | antineoplastic agents                         |
| Indinavir                            | Crixivan     | 1 |   |   | 1 | 1996-09-13 | antivirals for systemic use                   |
| Insulin lispro                       | Humalog      |   | 1 | 1 |   | 1996-10-08 | drugs used in diabetes                        |

|                       |                             |   |   |   |            |                                                   |
|-----------------------|-----------------------------|---|---|---|------------|---------------------------------------------------|
| Dirithromycin         | Dynabac                     |   | 1 | 1 | 1996-10-28 | antibacterials for systemic use                   |
| Olanzapine            | Zyprexa                     |   | 1 | 1 | 1996-10-28 | psycholeptics                                     |
| Nalmefene             | Revox                       |   | 1 | 1 | 1996-11-06 | other nervous system                              |
| Zolpidem              | Ambien                      |   | 1 | 1 | 1996-11-20 | psycholeptics                                     |
| Desflurane            | Suprane                     |   | 1 | 1 | 1996-12-03 | anesthetics                                       |
| Gemcitabine           | Gemzar                      |   | 1 | 1 | 1996-12-23 | antineoplastic agents                             |
| Ropivacaine           | Naropin injections          |   | 1 | 1 | 1996-12-24 | anesthetics                                       |
| Imiglucerase          | Cerezyme                    | 1 |   | 1 | 1997-02-12 | other alimentary tract and metabolism products    |
| Atorvastatin          | Lipitor                     |   | 1 | 1 | 1997-02-19 | lipid modifying agents                            |
| Topiramate            | Topamax                     |   | 1 | 1 | 1997-03-06 | antiepileptics                                    |
| Formoterol            | Foradil dry powder capsules |   | 1 | 1 | 1997-03-06 | drugs for obstructive airway diseases             |
| Epoprostenol          | Flolan                      |   | 1 | 1 | 1997-03-06 | antithrombotic agents                             |
| Coagulation factor IX | Benefix                     | 1 |   | 1 | 1997-03-21 | antihemorrhagics                                  |
| Topotecan             | Hycamtin                    |   | 1 | 1 | 1997-04-15 | antineoplastic agents                             |
| Dolasetron            | Anzemet                     |   | 1 | 1 | 1997-05-21 | antiemetics and antinauseants                     |
| Letrozole             | Femara                      |   | 1 | 1 | 1997-05-21 | endocrine therapy                                 |
| Fexofenadine          | Allegra                     |   | 1 | 1 | 1997-06-11 | antihistamines for systemic use                   |
| Latanoprost           | Xalatan                     |   | 1 | 1 | 1997-06-16 | ophthalmologicals                                 |
| Carbetocin            | Duratocin                   |   | 1 | 1 | 1997-06-24 | pituitary and hypothalamic hormones and analogues |
| Follitropin beta      | Puregon                     |   | 1 | 1 | 1997-07-02 | sex hormones and modulators of the genital svstem |

|                  |                           |   |   |            |                                                  |
|------------------|---------------------------|---|---|------------|--------------------------------------------------|
| Irinotecan       | Camptosar                 | 1 | 1 | 1997-07-04 | antineoplastic agents                            |
| Donepezil        | Aricept                   | 1 | 1 | 1997-08-12 | psychoanaleptics                                 |
| Ropinirole       | Requip                    | 1 | 1 | 1997-08-19 | anti-parkinson drugs                             |
| Ibandronate      | Bondronat                 | 1 | 1 | 1997-08-27 | drugs for treatment of<br>bone disease           |
| Glatiramer       | Copaxone for<br>injection | 1 | 1 | 1997-09-04 | immunostimulants                                 |
| Tolcapone        | Tasmar                    | 1 | 1 | 1997-10-08 | anti-parkinson drugs                             |
| Zafirlukast      | Accolate                  | 1 | 1 | 1997-10-21 | drugs for obstructive<br>airway diseases         |
| Valsartan        | Diovan                    | 1 | 1 | 1997-11-03 | agents acting on the<br>renin-angiotensin system |
| Levofloxacin     | Levaquin                  | 1 | 1 | 1997-11-14 | antibacterials for<br>systemic use               |
| Brimonidine      | Alphagan<br>ophthalmic    | 1 | 1 | 1997-11-24 | ophthalmologicals                                |
| Quetiapine       | Seroquel                  | 1 | 1 | 1997-12-02 | psycholeptics                                    |
| Pramipexole      | Mirapex                   | 1 | 1 | 1998-01-29 | anti-parkinson drugs                             |
| Interferon Beta- | Rebif                     | 1 | 1 | 1998-02-05 | immunostimulants                                 |
| Emedastine       | Emadine<br>ophthalmic     | 1 | 1 | 1998-02-16 | ophthalmologicals                                |
| Cerivastatin     | Baycol                    | 1 | 1 | 1998-02-18 | lipid modifying agents                           |
| Grepafloxacin    | Raxar                     | 1 | 1 | 1998-04-09 | antibacterials for<br>systemic use               |
| Naratriptan      | Amerge                    | 1 | 1 | 1998-04-28 | analgesics                                       |
| Bupropion        | Wellbutrin SR             | 1 | 1 | 1998-04-28 | psychoanaleptics                                 |
| Irbesartan       | Avapro                    | 1 | 1 | 1998-06-01 | agents acting on the<br>renin-angiotensin system |
| Tamsulosin       | Flomax                    | 1 | 1 | 1998-06-01 | urologicals                                      |
| Montelukast      | Singulair                 | 1 | 1 | 1998-06-17 | drugs for obstructive<br>airway diseases         |

|                         |                       |   |   |   |   |            |                                                   |                  |
|-------------------------|-----------------------|---|---|---|---|------------|---------------------------------------------------|------------------|
| Delavirdine             | Rescriptor            |   | 1 | 1 | 1 | 1998-07-22 | antivirals for systemic use                       |                  |
| Nelfinavir              | Viracept              |   | 1 |   | 1 | 1998-08-11 | antivirals for systemic use                       |                  |
| Zolmitriptan            | Zomig                 |   | 1 | 1 |   | 1998-08-24 | analgesics                                        |                  |
| Capecitabine            | Xeloda                |   | 1 |   | 1 | 1998-08-31 | antineoplastic agents                             |                  |
| Nevirapine              | Viramune              |   | 1 | 1 | 1 | 1998-09-04 | antivirals for systemic use                       |                  |
| Clopidogrel             | Plavix                |   | 1 | 1 |   | 1998-10-07 | antithrombotic agents                             |                  |
| Brinzolamide            | Azopt                 |   | 1 | 1 |   | 1998-10-23 | ophthalmologicals                                 |                  |
|                         | ophthalmic suspension |   |   |   |   |            |                                                   |                  |
| Raloxifene              | Evista                |   | 1 | 1 |   | 1998-11-06 | sex hormones and modulators of the genital svstem |                  |
| Candesartan             | Atacand               |   | 1 | 1 |   | 1998-11-20 | agents acting on the renin-angiotensin system     |                  |
| Tolterodine             | Detrol                |   | 1 | 1 |   | 1998-11-20 | urologicals                                       |                  |
| Varicella vaccine       | Varivax               | 1 |   | 1 |   | 1998-12-02 | vaccines                                          |                  |
| Alatrofloxacin          | Trovan (IV)           |   | 1 | 1 |   | 1998-12-04 | antibacterials for systemic use                   |                  |
| Trovafloxacin           | Trovan (tablets)      |   | 1 | 1 |   | 1998-12-04 | antibacterials for systemic use                   |                  |
| Becaplermin gel         | Regranex              |   | 1 | 1 |   | 1998-12-30 | preparations for wounds and ulcers                |                  |
| Tizanidine              | Zanaflex              |   | 1 | 1 |   | 1999-01-25 | muscle relaxants                                  |                  |
| Penciclovir             | Denavir               |   | 1 | 1 |   | 1999-02-02 | antivirals for systemic use                       |                  |
| Citalopram              | Celexa                |   | 1 | 1 |   | 1999-02-05 | psychoanaleptics                                  |                  |
| Recombinant factor VIIa | Niastase              |   | 1 |   | 1 | 1          | 1999-02-12                                        | antihemorrhagics |
| Modafinil               | Alertec               |   | 1 | 1 |   | 1999-02-26 | psychoanaleptics                                  |                  |

|                                              |            |   |   |   |   |            |                                               |                             |
|----------------------------------------------|------------|---|---|---|---|------------|-----------------------------------------------|-----------------------------|
| Sildenafil                                   | Viagra     | 1 |   | 1 |   | 1999-03-08 | urologicals                                   |                             |
| Recombinant-methionyl interferon consensus 1 | Infergen   |   | 1 |   | 1 | 1999-03-11 | immunostimulants                              |                             |
| Efavirenz                                    | Sustiva    |   | 1 |   | 1 | 1999-03-19 | antivirals for systemic use                   |                             |
| Repaglinide                                  | Gluconorm  |   | 1 |   | 1 | 1999-04-06 | drugs used in diabetes                        |                             |
| Celecoxib                                    | Celebrex   |   | 1 |   | 1 | 1999-04-14 | antiinflammatoary and antirheumatic products  |                             |
| Triptorelin                                  | Trelstar   |   | 1 |   | 1 | 1999-05-06 | endocrine therapy                             |                             |
| Ancestim                                     | Stemgen    |   | 1 |   | 1 | 1999-05-20 | immunostimulants                              |                             |
| Orlistat                                     | Xenical    |   | 1 |   | 1 | 1999-06-03 | antiobesity preparations                      |                             |
| Abacavir                                     | Ziagen     |   | 1 |   | 1 | 1          | 1999-06-04                                    | antivirals for systemic use |
| Eptifibatide                                 | Integrilin |   | 1 |   | 1 | 1999-06-11 | antithrombotic agents                         |                             |
| Eprosartan                                   | Teveten    |   | 1 |   | 1 | 1999-07-09 | agents acting on the renin-angiotensin system |                             |
| Cidofovir                                    | Vistide    |   | 1 |   | 1 | 1999-07-13 | antivirals for systemic use                   |                             |
| Rizatriptan                                  | Maxalt     |   | 1 |   | 1 | 1999-07-16 | analgesics                                    |                             |
| Trastuzumab                                  | Herceptin  |   | 1 |   | 1 | 1999-08-13 | antineoplastic agents                         |                             |
| Telmisartan                                  | Micardis   |   | 1 |   | 1 | 1999-08-16 | agents acting on the renin-angiotensin system |                             |
| Risedronate                                  | Actonel    |   | 1 |   | 1 | 1999-08-18 | drugs for treatment of bone disease           |                             |
| Tirofiban                                    | Aggrastat  |   | 1 |   | 1 | 1999-08-19 | antithrombotic agents                         |                             |
| Icodextrin                                   | Extraneal  |   | 1 |   | 1 | 1999-09-17 | blood substitutes and perfusion solutions     |                             |
| Varicella zoster vaccine                     | Varilrix   |   | 1 |   | 1 | 1999-10-13 | vaccines                                      |                             |
| Temozolomide                                 | Temodal    |   | 1 |   | 1 | 1999-10-25 | antineoplastic agents                         |                             |

|                       |            |   |   |   |   |            |   |   |                                              |
|-----------------------|------------|---|---|---|---|------------|---|---|----------------------------------------------|
| Rofecoxib             | Vioxx      |   | 1 |   | 1 | 1999-10-25 |   |   | antiinflammaotory and antirheumatic products |
| Zanamivir             | Relenza    |   | 1 |   | 1 | 1999-11-02 | 1 |   | antivirals for systemic use                  |
| Melanoma theracine    | Melacine   |   | 1 |   | 1 | 1999-11-04 |   |   | immunostimulants                             |
| Gadobutrol            | Gadovist   |   | 1 | 1 |   | 1999-11-08 |   |   | contrast media                               |
| Dalfopristin          | Synercid   |   | 1 | 1 |   | 1999-12-10 |   |   | antibacterials for systemic use              |
| Oseltamivir           | Tamiflu    |   | 1 | 1 |   | 1999-12-23 |   |   | antivirals for systemic use                  |
| Daclizumab            | Zenaprax   |   | 1 |   | 1 | 2000-01-04 |   | 1 | antineoplastic agents                        |
| Leflunomide           | Arava      |   | 1 | 1 |   | 2000-03-16 | 1 |   | immunosuppressants                           |
| Rituximab             | Rituxan    | 1 |   |   | 1 | 2000-03-17 |   | 1 | immunosuppressants                           |
| Rosiglitazone         | Avandia    |   | 1 |   | 1 | 2000-03-21 | 1 |   | drugs used in diabetes                       |
| Oxcarbazepine         | Trileptal  |   | 1 | 1 |   | 2000-04-13 | 1 |   | antiepileptics                               |
| Rivastigmine          | Exelon     |   | 1 | 1 |   | 2000-04-13 | 1 |   | psychoanaleptics                             |
| Zaleplon              | Starnoc    |   | 1 | 1 |   | 2000-05-11 | 1 |   | psycholeptics                                |
| Verteporfin           | Visudyne   | 1 |   |   | 1 | 2000-05-31 | 1 |   | ophthalmologicals                            |
| Cabergoline           | Dostinex   |   | 1 | 1 |   | 2000-06-30 | 1 |   | anti-parkinson drugs                         |
| Exemestane            | Aromasin   |   | 1 | 1 |   | 2000-08-17 | 1 |   | endocrine therapy                            |
| Pioglitazone          | Actos      |   | 1 |   | 1 | 2000-08-17 | 1 |   | drugs used in diabetes                       |
| Zoledronic acid       | Zometa     |   | 1 |   | 1 | 2000-08-21 | 1 |   | drugs for treatment of bone disease          |
| Riluzole              | Rilutek    | 1 |   |   | 1 | 2000-08-30 | 1 | 1 | other nervous system                         |
| Meloxicam             | Mobic      |   | 1 | 1 |   | 2000-08-31 | 1 |   | antiinflammaotory and antirheumatic products |
| Basiliximab           | Simulect   |   | 1 |   | 1 | 2000-09-01 |   | 1 | immunosuppressants                           |
| Moxifloxacin          | Avelox     |   | 1 | 1 |   | 2000-10-19 | 1 |   | antibacterials for systemic use              |
| Peginterferon Alfa-2b | Peg-intron |   | 1 | 1 |   | 2000-10-20 |   | 1 | immunostimulants                             |
| Etanercept            | Enbrel     | 1 |   |   | 1 | 2000-12-01 |   | 1 | immunosuppressants                           |

|                       |           |   |   |   |            |   |   |                                   |
|-----------------------|-----------|---|---|---|------------|---|---|-----------------------------------|
| Gadoversetamide       | Optimark  | 1 | 1 |   | 2000-12-11 | 1 |   | contrast media                    |
| Sibutramine           | Meridia   | 1 | 1 |   | 2000-12-28 | 1 |   | antiobesity preparations          |
| Sirolimus             | Rapamune  | 1 | 1 |   | 2001-01-05 | 1 |   | immunosuppressants                |
| Gatifloxacin          | Tequin    | 1 | 1 |   | 2001-01-09 | 1 |   | antibacterials for systemic use   |
| Glucagon, rDNA origin | Glucagon  | 1 |   | 1 | 2001-01-11 |   | 1 | pancreatic hormones               |
| Mequinol/tretinoin    | Solage    | 1 | 1 |   | 2001-01-17 | 1 |   | other dermatological preparations |
| Amprenavir            | Agenerase | 1 | 1 | 1 | 2001-03-01 | 1 |   | antivirals for systemic use       |
| Lopinavir/ritonavir   | Kaletra   | 1 |   | 1 | 2001-03-09 | 1 |   | antivirals for systemic use       |
| Linezolid             | Zyvoxam   | 1 | 1 |   | 2001-04-02 | 1 |   | antibacterials for systemic use   |
| Iron                  | Venofer   | 1 |   | 1 | 2001-04-17 | 1 |   | antianemic preparations           |
| Doxercalciferol       | Hectorol  | 1 | 1 |   | 2001-04-30 | 1 |   | calcium homeostasis               |
| Rabeprazole           | Pariet    | 1 | 1 |   | 2001-05-07 | 1 |   | drugs for acid related disorders  |
| Entacapone            | Comtan    | 1 | 1 |   | 2001-05-08 | 1 |   | anti-parkinson drugs              |
| Eflornithine          | Vaniqa    | 1 | 1 |   | 2001-05-10 | 1 |   | antiprotozoals                    |
| Mirtazapine           | Remeron   | 1 | 1 |   | 2001-05-18 | 1 |   | psychoanaleptics                  |
| Desloratadine         | Aerius    | 1 | 1 |   | 2001-05-29 | 1 |   | antihistamines for systemic use   |
| Infliximab            | Remicade  | 1 | 1 |   | 2001-06-06 |   | 1 | immunosuppressants                |
| Caspofungin           | Cancidas  | 1 |   | 1 | 2001-07-29 | 1 |   | antimycotics for systemic use     |
| Galantamine           | Reminyl   | 1 | 1 |   | 2001-07-31 | 1 |   | psychoanaleptics                  |
| Esomeprazole          | Nexium    | 1 | 1 |   | 2001-08-17 | 1 |   | drugs for acid related disorders  |
| Imatinib              | Gleevec   |   |   | 1 | 2001-09-20 | 1 | 1 | antineoplastic agents             |
| Tenecteplase          | Tnkase    | 1 | 1 |   | 2001-10-17 |   | 1 | antithrombotic agents             |
| Travoprost            | Travatan  | 1 | 1 |   | 2001-11-09 | 1 |   | ophthalmologicals                 |



|                                                      |            |   |   |            |   |                                                          |
|------------------------------------------------------|------------|---|---|------------|---|----------------------------------------------------------|
| Bosentan                                             | Tracleer   | 1 | 1 | 2001-11-30 | 1 | antihypertensives                                        |
| Meningococcal group C polysaccharide, tetanus toxoid | Neisvac-C  | 1 | 1 | 2001-12-18 | 1 | vaccines                                                 |
| Glimepiride                                          | Amaryl     | 1 | 1 | 2002-01-25 | 1 | drugs used in diabetes                                   |
| Nateglinide                                          | Starlix    | 1 | 1 | 2002-02-13 | 1 | drugs used in diabetes                                   |
| Alfuzosin                                            | Xatral     | 1 | 1 | 2002-02-21 |   | urologicals                                              |
| Tegaserod                                            | Zelnorm    | 1 | 1 | 2002-03-12 | 1 | drugs for constipation                                   |
| Ganirelix                                            | Orgalutran | 1 | 1 | 2002-05-01 | 1 | pituitary and hypothalamic hormones                      |
| Valganciclovir                                       | Valcyte    | 1 | 1 | 2002-05-03 | 1 | antivirals for systemic use                              |
| Palivizumab                                          | Synagis    | 1 | 1 | 2002-05-15 | 1 | immune sera and immunoglobulins                          |
| Docosanol                                            | Abreva     | 1 | 1 | 2002-05-24 | 1 | antibiotics and chemotherapeutics for dermatological use |
| Bimatoprost                                          | Lumigan    | 1 | 1 | 2002-05-24 | 1 | ophthalmologicals                                        |
| Anakinra                                             | Kineret    | 1 | 1 | 2002-05-24 | 1 | immunosuppressants                                       |
| Moroctocog alpha                                     | Refacto    | 1 | 1 | 2002-05-28 | 1 | antihemorrhagics                                         |
| Peginterferon Alfa-2b                                | Pegatron   | 1 | 1 | 2002-05-31 | 1 | immunostimulants                                         |
| Fondaparinux                                         | Arixtra    | 1 | 1 | 2002-06-13 | 1 | antithrombotic agents                                    |
| Hetastarch                                           | Hextend    | 1 | 1 | 2002-07-08 | 1 | blood substitutes and perfusion solutions                |
| Darbepoetin alpha                                    | Aranesp    | 1 | 1 | 2002-08-02 | 1 | antianemic preparations                                  |
| Norelgestromin/ ethinyl estradiol                    | Evra       | 1 | 1 | 2002-08-20 | 1 | sex hormones and modulators of the genital system        |
| Treprostinil                                         | Remodulin  | 1 | 1 | 2002-10-04 | 1 | antithrombotic agents                                    |
| Bivalirudin                                          | Angiomax   | 1 | 1 | 2002-10-09 | 1 | antithrombotic agents                                    |

|                                     |           |   |   |   |   |            |   |   |                                               |
|-------------------------------------|-----------|---|---|---|---|------------|---|---|-----------------------------------------------|
| Tiotropium                          | Spiriva   |   | 1 | 1 |   | 2002-11-20 | 1 |   | drugs for obstructive airway diseases         |
| Valdecoxib                          | Betra     |   | 1 | 1 |   | 2002-12-11 | 1 |   | antiinflammatoory and antirheumatic products  |
| Drotrecogin Alfa                    | Xigris    | 1 |   |   | 1 | 2003-01-31 |   | 1 | antithrombotic agents                         |
| Rosuvastatin                        | Crestor   |   | 1 | 1 |   | 2003-02-18 | 1 |   | lipid modifying agents                        |
| Recombinant cholera toxin B subunit | Dukoral   |   | 1 |   | 1 | 2003-02-21 |   | 1 | vaccines                                      |
| Levetiracetam                       | Keppra    |   | 1 | 1 |   | 2003-03-06 | 1 |   | antiepileptics                                |
| Tenofovir                           | Viread    |   | 1 |   | 1 | 2003-03-18 | 1 | 1 | antivirals for systemic use                   |
| Pimecrolimus                        | Elidel    |   | 1 | 1 |   | 2003-03-19 | 1 |   | other dermatological preparations             |
| Ertapenem                           | Invanz    |   | 1 | 1 |   | 2003-05-12 | 1 |   | antibacterials for systemic use               |
| Ezetimibe                           | Ezetrol   |   | 1 | 1 |   | 2003-05-12 | 1 |   | lipid modifying agents                        |
| Telithromycin                       | Ketek     |   | 1 | 1 |   | 2003-05-28 | 1 |   | antibacterials for systemic use               |
| Enfuvirtide                         | Fuzeon    | 1 |   |   | 1 | 2003-07-14 | 1 |   | antivirals for systemic use                   |
| Dutasteride                         | Avodart   |   | 1 | 1 |   | 2003-07-22 | 1 |   | urologicals                                   |
| Peginterferon Alfa-2a               | Pegasys   |   | 1 | 1 |   | 2003-08-13 |   | 1 | immunostimulants                              |
| Cetrorelix                          | Cetrotide |   | 1 | 1 |   | 2003-08-13 | 1 |   | pituitary and hypothalamic hormones           |
| Adefovir                            | Hepsera   |   | 1 |   | 1 | 2003-08-27 | 1 |   | antivirals for systemic use                   |
| Tadalafil                           | Cialis    |   | 1 | 1 |   | 2003-09-17 | 1 |   | urologicals                                   |
| Almotriptan                         | Axert     |   | 1 | 1 |   | 2003-10-01 | 1 |   | agents acting on the renin-angiotensin system |
| Rasburicase                         | Fasturtec |   | 1 |   | 1 | 2003-10-29 |   | 1 | all other therapeutic products                |

|                                 |                       |   |   |   |   |            |   |                                                   |
|---------------------------------|-----------------------|---|---|---|---|------------|---|---------------------------------------------------|
| Atazanavir                      | Reyataz               |   | 1 |   | 1 | 2003-12-05 | 1 | antivirals for systemic use                       |
| Gefitinib                       | Iressa                |   | 1 |   | 1 | 2003-12-17 | 1 | antineoplastic agents                             |
| Agalsidase Beta                 | Fabrazyme             |   | 1 |   | 1 | 2004-01-23 |   | 1 other alimentary tract and metabolism products  |
| Agalsidase                      | Replagal              | 1 |   |   | 1 | 2004-02-06 |   | 1 other alimentary tract and metabolism products  |
| Fulvestrant                     | Faslodex              |   | 1 | 1 |   | 2004-02-17 | 1 | endocrine therapy                                 |
| Gemifloxacin                    | Factive               |   | 1 | 1 |   | 2004-03-09 | 1 | antibacterials for systemic use                   |
| Pegfilgrastim                   | Neulasta              |   | 1 | 1 |   | 2004-03-12 |   | 1 immunostimulants                                |
| Vardenafil                      | Levitra               |   | 1 | 1 |   | 2004-03-17 | 1 | urologicals                                       |
| Gadobenate                      | Multihance            |   | 1 | 1 |   | 2004-03-31 | 1 | contrast media                                    |
| Miglustat                       | Zavesca               |   | 1 |   | 1 | 2004-03-31 | 1 | other alimentary tract and metabolism products    |
| Botulinum Toxin Type B          | Myobloc               |   | 1 | 1 |   | 2004-04-16 |   | 1 muscle relaxants                                |
| Peginterferon Alfa-2A           | Pegasys RBV Ribavirin |   | 1 |   | 1 | 2004-05-10 |   | 1 immunostimulants                                |
| Ethinyl estradiol/etonog estrel | Nuvaring              |   | 1 | 1 |   | 2004-05-11 | 1 | sex hormones and modulators of the genital svstem |
| Pemetrexed                      | Alimta                |   | 1 |   | 1 | 2004-05-21 | 1 | antineoplastic agents                             |
| Laronidase                      | Adlurazyme            | 1 |   |   | 1 | 2004-05-31 |   | 1 other alimentary tract and metabolism products  |
| Teriparatide                    | Forteo                |   | 1 |   | 1 | 2004-06-03 |   | 1 calcium homeostasis                             |
| Cinacalcet                      | Sensipar              | 1 |   |   | 1 | 2004-08-04 | 1 | calcium homeostasis                               |
| Eletriptan                      | Relpax                |   | 1 | 1 |   | 2004-08-05 | 1 | analgesics                                        |

|                                |              |   |   |   |            |   |   |                                                   |
|--------------------------------|--------------|---|---|---|------------|---|---|---------------------------------------------------|
| Voriconazole                   | Vfend        | 1 | 1 |   | 2004-08-20 | 1 |   | antimycotics for systemic use                     |
| Frovatriptan                   | Frova        | 1 | 1 |   | 2004-09-03 | 1 |   | analgesics                                        |
| Adalimumab                     | Humira       | 1 | 1 |   | 2004-09-24 |   | 1 | immunosuppressants                                |
| Alefacept                      | Amevive      | 1 | 1 |   | 2004-10-06 |   | 1 | immunosuppressants                                |
| Omalizumab                     | Xolair       | 1 | 1 |   | 2004-11-18 |   | 1 | drugs for obstructive airway diseases             |
| Memantine                      | Ebixa        | 1 | 1 | 1 | 2004-12-08 | 1 |   | psychoanaleptics                                  |
| Fosamprenavir                  | Telzir       | 1 | 1 |   | 2004-12-10 | 1 |   | antivirals for systemic use                       |
| Drospirenone/ethinyl estradiol | Yasmin 21/28 | 1 | 1 |   | 2004-12-10 | 1 |   | sex hormones and modulators of the genital svstem |
| Atomoxetine                    | Strattera    | 1 | 1 |   | 2004-12-24 | 1 |   | psychoanaleptics                                  |
| Escitalopram                   | Cipralax     | 1 | 1 |   | 2004-12-24 | 1 |   | psychoanaleptics                                  |
| Bortezomib                     | Velcade      | 1 | 1 | 1 | 2005-01-27 | 1 |   | antineoplastic agents                             |
| Paricalcitol                   | Zemplar      | 1 | 1 |   | 2005-03-31 | 1 |   | calcium homeostasis                               |
| Pantoprazole                   | Pantaloc M   | 1 | 1 |   | 2005-04-22 | 1 |   | drugs for acid related disorders                  |
| Pegaptanib                     | Macugen      |   |   | 1 | 2005-05-02 | 1 |   | ophthalmologicals                                 |
| Ibritumomab                    | Zevalin      | 1 |   | 1 | 2005-05-10 |   | 1 | therapeutic radiopharmaceuticals                  |
| Pregabalin                     | Lyrica       | 1 | 1 |   | 2005-06-03 | 1 |   | antiepileptics                                    |
| Lutropin Alfa                  | Luveris      | 1 | 1 |   | 2005-06-24 |   | 1 | sex hormones and modulators of the genital svstem |
| Erlotinib                      | Tarceva      | 1 |   | 1 | 2005-07-07 | 1 |   | antineoplastic agents                             |
| Tramadol                       | Tramacet     | 1 | 1 |   | 2005-07-20 | 1 |   | analgesics                                        |
| Sodium oxybate                 | Xyrem        | 1 | 1 |   | 2005-08-05 | 1 |   | other nervous system                              |
| Perindopril                    | Coversyl     | 1 | 1 |   | 2005-08-23 | 1 |   | agents acting on the renin-angiotensin system     |
| Bevacizumab                    | Avastin      | 1 |   | 1 | 2005-09-09 |   | 1 | antineoplastic agents                             |

|                                  |                    |   |   |   |   |            |            |   |                                                   |
|----------------------------------|--------------------|---|---|---|---|------------|------------|---|---------------------------------------------------|
| Cetuximab                        | Erbix              |   | 1 |   | 1 | 2005-09-09 |            | 1 | antineoplastic agents                             |
| Insulin detemir                  | Levemir            |   | 1 | 1 |   | 2005-09-29 |            | 1 | drugs used in diabetes                            |
| Pegvisomant                      | Somavert           |   | 1 |   | 1 | 2005-10-17 |            | 1 | pituitary and hypothalamic hormones               |
| Efalizumab                       | Raptiva            |   | 1 | 1 |   | 2005-10-24 |            | 1 | immunosuppressants                                |
| Darifenacin                      | Enablex            |   | 1 | 1 |   | 2005-11-14 | 1          |   | urologicals                                       |
| Emtricitabine                    | Emtriva            |   | 1 | 1 |   | 2005-11-21 | 1          |   | antivirals for systemic use                       |
| Tipranavir                       | Aptivus            |   | 1 |   | 1 | 2005-11-21 | 1          |   | antivirals for systemic use                       |
| Alemtuzumab                      | Mabcampath         | 1 |   | 1 |   | 2005-11-30 |            | 1 | immunosuppressants                                |
| Palifermin                       | Kepivance          | 1 |   |   | 1 | 2005-12-09 |            | 1 | all other therapeutic products                    |
| Trospium                         | Trosec             |   | 1 | 1 |   | 2006-01-10 | 1          |   | urologicals                                       |
| Solifenacin                      | Vesicare           |   | 1 | 1 |   | 2006-02-20 | 1          |   | urologicals                                       |
| Histrelin                        | Vantas             |   | 1 | 1 |   | 2006-03-10 | 1          |   | endocrine therapy                                 |
| Insulin glulisine                | Apidra             |   | 1 | 1 |   | 2006-04-12 |            | 1 | drugs used in diabetes                            |
| Sunitinib                        | Sutent             |   | 1 |   | 1 | 1          | 2006-05-26 | 1 | antineoplastic agents                             |
| Entecavir                        | Baraclude          |   | 1 |   | 1 |            | 2006-06-16 | 1 | pituitary and hypothalamic hormones and analogues |
| Abatacept                        | Orencia            |   | 1 |   | 1 |            | 2006-06-29 |   | immunosuppressants                                |
| Recombinant human papillomavirus | Gardasil           | 1 |   |   | 1 |            | 2006-07-10 |   | vaccines                                          |
| Lanreotide                       | Somatuline autogel |   | 1 | 1 |   |            | 2006-07-17 | 1 | antivirals for systemic use                       |
| Sorafenib                        | Nexavar            |   | 1 | 1 |   |            | 2006-07-28 | 1 | antineoplastic agents                             |
| Darunavir                        | Prezista           |   | 1 | 1 |   | 1          | 2006-07-28 | 1 | antivirals for systemic use                       |
| Rotaviruses                      | Rotateq            | 1 |   |   | 1 |            | 2006-08-01 |   | vaccines                                          |

|                    |                    |   |   |   |   |            |            |                                                |                                |
|--------------------|--------------------|---|---|---|---|------------|------------|------------------------------------------------|--------------------------------|
| Alglucosidase Alfa | Myozyme            | 1 |   | 1 |   | 2006-08-14 | 1          | other alimentary tract and metabolism products |                                |
| Rasagiline         | Azilect            |   | 1 | 1 |   | 2006-08-17 | 1          | anti-parkinson drugs                           |                                |
| Ciclesonide        | Alvesco            |   | 1 | 1 |   | 2006-09-11 | 1          | drugs for obstructive airway diseases          |                                |
| Tigecycline        | Tygacil            |   | 1 | 1 |   | 2006-09-14 | 1          | antibacterials for systemic use                |                                |
| Natalizumab        | Tysabri            |   | 1 |   | 1 | 2006-09-28 |            | 1 immunosuppressants                           |                                |
| Lanthanum          | Fosrenol           |   | 1 | 1 |   | 2006-10-17 | 1          | all other therapeutic products                 |                                |
| Deferasirox        | Exjade             |   | 1 |   | 1 | 1          | 2006-10-18 | 1                                              | all other therapeutic products |
| Gadofosveset       | Vasovist           |   | 1 | 1 |   | 2006-10-31 | 1          | contrast media                                 |                                |
| Telbivudine        | Sebivo             |   | 1 |   | 1 | 2006-11-28 | 1          | antivirals for systemic use                    |                                |
| Varenicline        | Champix            |   | 1 | 1 |   | 2007-01-24 | 1          | other nervous system                           |                                |
| Acamprosate        | Campral            |   | 1 | 1 |   | 2007-03-16 | 1          | other nervous system                           |                                |
| Dasatinib          | Sprycell           | 1 |   | 1 |   | 1          | 2007-03-26 | 1                                              | antineoplastic agents          |
| Posaconazole       | Spriafil (Posanol) | 1 |   |   | 1 | 2007-03-26 | 1          | antimycotics for systemic use                  |                                |
| Micafungin         | Mycamine           |   | 1 | 1 |   | 2007-05-22 | 1          | antimycotics for systemic use                  |                                |
| Sitaxentan         | Thelin             |   | 1 | 1 |   | 2007-05-30 | 1          | antihypertensives                              |                                |
| Idursulfase        | Elaprase           |   | 1 |   | 1 | 2007-06-13 | 1          | other alimentary tract and metabolism products |                                |
| Oxaliplatin        | Eloxatin           |   | 1 |   | 1 | 2007-06-15 | 1          | antineoplastic agents                          |                                |
| Ranibizumab        | Lucentis           | 1 |   |   | 1 | 2007-06-26 |            | 1 ophthalmologicals                            |                                |
| Fluticasone        | Avamys             |   | 1 | 1 |   | 2007-08-14 | 1          | drugs for obstructive airway diseases          |                                |
| Aprepitant         | Emend              |   | 1 | 1 |   | 2007-08-24 | 1          | antiemetics and antinauseants                  |                                |

|                  |              |   |  |   |   |            |   |                                               |
|------------------|--------------|---|--|---|---|------------|---|-----------------------------------------------|
| Maraviroc        | Celsentri    |   |  | 1 | 1 | 2007-09-21 | 1 | antivirals for systemic use                   |
| Daptomycin       | Cubicin      |   |  | 1 | 1 | 2007-09-24 | 1 | antibacterials for systemic use               |
| Paliperidone     | Invega       |   |  | 1 | 1 | 2007-09-26 | 1 | psycholeptics                                 |
| Duloxetine       | Cymbalta     |   |  | 1 | 1 | 2007-11-01 | 1 | psychoanaesthetics                            |
| Nesiritide       | Natreacor    |   |  | 1 | 1 | 2007-11-08 | 1 | cardiac therapy                               |
| Aliskiren        | Rasilez      |   |  | 1 | 1 | 2007-11-14 | 1 | agents acting on the renin-angiotensin system |
| Anidulafungin    | Eraxis       |   |  | 1 | 1 | 2007-11-14 | 1 | antimycotics for systemic use                 |
| Raltegravir      | Isentress    |   |  | 1 | 1 | 2007-11-27 | 1 | antivirals for systemic use                   |
| Rivastigmine     | Exelon patch |   |  | 1 | 1 | 2007-11-29 | 1 | psychoanaesthetics                            |
| Sitagliptin      | Januvia      |   |  | 1 | 1 | 2007-12-14 | 1 | drugs used in diabetes                        |
| Temsirolimus     | Torisel      |   |  | 1 | 1 | 2007-12-21 | 1 | antineoplastic agents                         |
| Lenalidomide     | Revlimid     | 1 |  |   | 1 | 2008-01-17 | 1 | immunosuppressants                            |
| Ambrisentan      | Volibris     |   |  | 1 | 1 | 2008-03-20 | 1 | antihypertensives                             |
| Etravirine       | Intelence    |   |  | 1 | 1 | 2008-03-27 | 1 | antivirals for systemic use                   |
| Methylnaltrexone | Relistor     | 1 |  |   | 1 | 2008-03-28 | 1 | drugs for constipation                        |
| Panitumumab      | Vectibix     |   |  | 1 | 1 | 2008-04-03 | 1 | antineoplastic agents                         |
| Nepafenac        | Nevanac      |   |  | 1 | 1 | 2008-04-17 | 1 | ophthalmologicals                             |
| Dabigatran       | Pradaxa      |   |  | 1 | 1 | 2008-06-10 | 1 | antithrombotic agents                         |
| Ceftobiprole     | Zeftera      |   |  | 1 | 1 | 2008-06-26 | 1 | antibacterials for systemic use               |
| Idebenone        | Catena       |   |  | 1 | 1 | 2008-07-23 | 1 | psychoanaesthetics                            |
| Nilotinib        | Tasigna      |   |  | 1 | 1 | 2008-09-09 | 1 | antineoplastic agents                         |
| Rivaroxaban      | Xarelto      |   |  | 1 | 1 | 2008-09-15 | 1 | antithrombotic agents                         |

|                         |           |   |   |   |            |   |                                               |
|-------------------------|-----------|---|---|---|------------|---|-----------------------------------------------|
| Olmesartan              | Olmotec   | 1 | 1 |   | 2008-10-28 | 1 | agents acting on the renin-angiotensin system |
| Capsular polysaccharide | Synflorix | 1 | 1 |   | 2008-12-11 |   | 1 vaccines                                    |
| Ustekinumab             | Stelara   | 1 | 1 |   | 2008-12-12 |   | 1 immunosuppressants                          |
| Loteprednol             | Alrex     | 1 | 1 |   | 2008-12-23 | 1 | ophthalmologicals                             |
| Eculizumab              | Soliris   | 1 |   | 1 | 2009-01-28 |   | 1 immunosuppressants                          |
| Desvenlafaxine          | Pristiq   | 1 | 1 |   | 2009-02-04 | 1 | psychoanaleptics                              |
| Lisdexamfetamine        | Vyvanse   | 1 | 1 |   | 2009-02-19 | 1 | psychoanaleptics                              |
| Romiplostim             | Nplate    | 1 |   | 1 | 2009-02-19 |   | 1 antihemorrhagics                            |
| Methyl aminolevulinate  | Metvix    | 1 | 1 |   | 2009-02-26 | 1 | antineoplastic agents                         |
| Eplerenone              | Inspra    | 1 | 1 |   | 2009-02-26 | 1 | diuretics                                     |
| Fosaprepitant           | Emend IV  | 1 | 1 |   | 2009-04-01 | 1 | antivirals for systemic use                   |
| Golimumab               | Simponi   | 1 | 1 |   | 2009-04-07 |   | 1 immunosuppressants                          |
| Lapatinib               | Tykerb    | 1 | 1 |   | 2009-05-15 | 1 | antineoplastic agents                         |
| Vorinostat              | Zolinza   | 1 | 1 |   | 2009-06-11 | 1 | antineoplastic agents                         |
| Aripiprazole            | Abilify   | 1 | 1 |   | 2009-07-09 | 1 | psycholeptics                                 |
| Clofarabine             | Clolar    | 1 | 1 |   | 2009-07-16 | 1 | antineoplastic agents                         |
| Dronedarone             | Multaq    | 1 |   | 1 | 2009-08-11 | 1 | cardiac therapy                               |
| Certolizumab            | Cimzia    | 1 | 1 |   | 2009-08-12 |   | 1 immunosuppressants                          |
| Doripenem               | Doribax   | 1 | 1 |   | 2009-09-02 | 1 | antibacterials for systemic use               |
| Aztreonam               | Cayston   | 1 |   | 1 | 2009-09-11 | 1 | antibacterials for systemic use               |
| Saxagliptin             | Onglyza   | 1 | 1 |   | 2009-09-14 | 1 | drugs used in diabetes                        |
| Besifloxacin            | Besivance | 1 | 1 |   | 2009-10-23 | 1 | ophthalmologicals                             |
| Azacitidine             | Vidaza    | 1 |   | 1 | 2009-10-23 | 1 | antineoplastic agents                         |



|                                                 |                                  |   |   |   |   |            |   |   |                                                   |
|-------------------------------------------------|----------------------------------|---|---|---|---|------------|---|---|---------------------------------------------------|
| Japanese<br>encephalitis<br>vaccine             | Ixiaro                           |   | 1 | 1 |   | 2009-10-29 |   | 1 | vaccines                                          |
| Alitretinoin                                    | Toctino                          |   | 1 | 1 |   | 2009-11-13 | 1 |   | antineoplastic agents                             |
| Degarelix                                       | Firmagon                         |   | 1 | 1 |   | 2009-11-16 | 1 |   | endocrine therapy                                 |
| Dexmedetomidine                                 | Precedex                         |   | 1 | 1 |   | 2009-12-09 | 1 |   | psycholeptics                                     |
| Everolimus                                      | Afinitor                         |   | 1 | 1 | 1 | 2009-12-14 | 1 |   | antineoplastic agents                             |
| Thrombin alfa                                   | Recothrom                        |   | 1 | 1 |   | 2009-12-15 |   | 1 | antihemorrhagics                                  |
| Pneumococcal<br>conjugate                       | Prevnar                          |   | 1 |   | 1 | 2009-12-21 |   | 1 | vaccines                                          |
| Gadoxetate                                      | Primovist                        |   | 1 | 1 |   | 2010-01-14 | 1 |   | contrast media                                    |
| Recombinant<br>human<br>papillomavirus          | Cervarix                         |   | 1 | 1 |   | 2010-02-03 |   | 1 | vaccines                                          |
| Canakinumab                                     | Ilaris                           | 1 |   |   | 1 | 2010-02-26 |   | 1 | immunosuppressants                                |
| Prasugrel                                       | Effient                          |   | 1 | 1 |   | 2010-04-16 | 1 |   | antithrombotic agents                             |
| Tocilizumab                                     | Actemra                          |   | 1 | 1 |   | 2010-04-30 |   | 1 | immunosuppressants                                |
| Sapropterin                                     | Kuvan                            | 1 |   |   | 1 | 2010-04-30 | 1 |   | other alimentary tract<br>and metabolism products |
| Trabectedin                                     | Yondelis                         |   | 1 | 1 |   | 2010-05-13 | 1 |   | antineoplastic agents                             |
| Liraglutide                                     | Victoza - 1.2 mg<br>pen-injector |   | 1 | 1 |   | 2010-05-21 |   | 1 | drugs used in diabetes                            |
| Meningococcal<br>oligosaccharides<br>conjugated | Menveo                           |   | 1 | 1 |   | 2010-05-21 |   | 1 | vaccines                                          |
| Pazopanib                                       | Votrient                         |   | 1 | 1 |   | 2010-05-27 | 1 |   | antineoplastic agents                             |
| Paliperidone                                    | Invega<br>sustenna               |   | 1 | 1 |   | 2010-06-30 | 1 |   | psycholeptics                                     |
| Sevelamer                                       | Renvela                          |   | 1 | 1 |   | 2010-07-07 | 1 |   | all other therapeutic<br>products                 |
| Dexlansoprazole                                 | Dexilant                         |   | 1 | 1 |   | 2010-07-22 | 1 |   | drugs for acid related<br>disorders               |

|                                              |                  |   |   |   |            |   |   |                                                |
|----------------------------------------------|------------------|---|---|---|------------|---|---|------------------------------------------------|
| Denosumab                                    | Prolia           |   | 1 | 1 | 2010-08-06 |   | 1 | drugs for treatment of bone disease            |
| Febuxostat                                   | Uloric           |   | 1 | 1 | 2010-09-22 |   | 1 | antigout preparations                          |
| Lacosamide                                   | Vimpat           |   | 1 | 1 | 2010-09-30 |   | 1 | antiepileptics                                 |
| Velaglucerase alf.                           | VPRIV            |   | 1 | 1 | 2010-10-01 |   | 1 | other alimentary tract and metabolism products |
| Roflumilast                                  | Daxas            |   | 1 | 1 | 2010-11-23 |   | 1 | drugs for obstructive airway diseases          |
| Tapentadol                                   | Nucynta CR       |   | 1 | 1 | 2010-12-02 |   | 1 | analgesics                                     |
| Silodosin                                    | Rapaflo          |   | 1 | 1 | 2011-01-11 |   | 1 | urologicals                                    |
| Eltrombopag                                  | Revolade         |   | 1 | 1 | 2011-01-12 |   | 1 | antihemorrhagics                               |
| Exenatide                                    | Byetta           |   | 1 | 1 | 2011-01-13 |   | 1 | drugs used in diabetes                         |
| Fingolimod                                   | Gilenya          |   | 1 | 1 | 2011-03-09 |   | 1 | immunosuppressants                             |
| Ticagrelor                                   | Brilinta         |   | 1 |   | 2011-05-30 | 1 | 1 | antithrombotic agents                          |
| Cabazitaxel                                  | Jevtana          |   | 1 | 1 | 2011-06-16 |   | 1 | antineoplastic agents                          |
| Rufinamide                                   | Banzel           |   | 1 | 1 | 2011-06-22 |   | 1 | antiepileptics                                 |
| Belimumab                                    | Benlysta         |   | 1 | 1 | 2011-07-06 |   | 1 | immunosuppressants                             |
| Rilpivirine                                  | Edurant          |   | 1 | 1 | 2011-07-21 |   | 1 | antivirals for systemic use                    |
| Tolvaptan                                    | Samsca           |   | 1 | 1 | 2011-07-25 |   | 1 | diuretics                                      |
| Abiraterone                                  | Zytiga           |   | 1 |   | 2011-07-27 | 1 | 1 | endocrine therapy                              |
| Linagliptin                                  | Trajenta         |   | 1 | 1 | 2011-07-28 |   | 1 | drugs used in diabetes                         |
| Boceprevir                                   | Victralis        | 1 |   |   | 2011-07-29 |   | 1 | antivirals for systemic use                    |
| Boceprevir, peginterferon alfa-2b, ribavirin | Victralis Triple | 1 |   |   | 2011-08-10 |   | 1 | immunostimulants                               |
| Telaprevir                                   | Incivek          |   | 1 |   | 2011-08-16 |   | 1 | antivirals for systemic use                    |
| Colesevelam                                  | Lodalis          |   | 1 | 1 | 2011-09-22 |   | 1 | lipid modifying agents                         |
| Senapine                                     | Saphris          |   | 1 | 1 | 2011-10-07 |   | 1 | psycholeptics                                  |

|                                       |                   |   |   |   |   |            |   |   |                                                                   |
|---------------------------------------|-------------------|---|---|---|---|------------|---|---|-------------------------------------------------------------------|
| Dienogest                             | Visanne           |   | 1 | 1 |   | 2011-10-12 | 1 |   | sex hormones and modulators of the genital svstem                 |
| Indacaterol                           | Onbrez breezhaler |   | 1 | 1 |   | 2011-12-06 | 1 |   | drugs for obstructive airway diseases                             |
| Prucalopride                          | Resotran          |   | 1 | 1 |   | 2011-12-07 | 1 |   | drugs for constipation                                            |
| Plerixafor                            | Mozobil           |   | 1 | 1 |   | 2011-12-08 | 1 |   | immunostimulants                                                  |
| Eribulin                              | Halaven           |   | 1 | 1 |   | 2011-12-14 | 1 |   | antineoplastic agents                                             |
| Apixaban                              | Eliquis           |   | 1 | 1 |   | 2011-12-16 | 1 |   | antithrombotic agents                                             |
| Vandetanib                            | Caprelsa          |   | 1 | 1 |   | 2012-01-12 | 1 |   | antineoplastic agents                                             |
| Ipilimumab                            | Yervoy            |   | 1 | 1 |   | 2012-02-01 |   | 1 | antineoplastic agents                                             |
| Fesoterodine                          | Toviaz            |   | 1 | 1 |   | 2012-02-09 | 1 |   | urologicals                                                       |
| Fampridine                            | Fampyra           |   | 1 | 1 |   | 2012-02-10 | 1 |   | other nervous system                                              |
| Vemurafenib                           | Zelboraf          | 1 |   |   | 1 | 2012-02-15 |   |   | antineoplastic agents                                             |
| Azilsartan                            | Edarbi            |   | 1 | 1 |   | 2012-03-08 | 1 |   | agents acting on the renin-angiotensin system                     |
| Ofatumumab                            | Arzerra           |   | 1 | 1 |   | 2012-03-09 |   | 1 | antineoplastic agents                                             |
| Palonosetron                          | Aloxi             |   | 1 | 1 |   | 2012-03-14 | 1 |   | antiemetics and antinauseants                                     |
| Crizotinib                            | Xalkori           |   | 1 | 1 | 1 | 2012-04-25 | 1 |   | antineoplastic agents                                             |
| Fidaxomicin                           | Dificid           |   | 1 | 1 |   | 2012-06-07 | 1 |   | antidiarrheals, intestinal antiinflammatory/antiinf ective agents |
| Lurasidone                            | Latuda            |   | 1 | 1 |   | 2012-06-13 | 1 |   | psycholeptics                                                     |
| Ruxolitinib                           | Jakavi            |   | 1 |   | 1 | 2012-06-19 | 1 |   | antineoplastic agents                                             |
| Collagenase clostridium histolviticum | Xiaflex           | 1 |   | 1 |   | 2012-07-05 |   | 1 | other drugs for disorders of the musculo-skeletal svstem          |
| Axitinib                              | Inlyta            |   | 1 | 1 |   | 2012-07-12 | 1 |   | antineoplastic agents                                             |
| Catridecacog                          | Tretten           |   | 1 |   | 1 | 2012-07-19 |   | 1 | antihemorrhagics                                                  |
| Bendamustine                          | Treanda           |   | 1 | 1 |   | 2012-08-24 | 1 |   | antineoplastic agents                                             |
| Pirfenidone                           | Esbriet           |   | 1 |   | 1 | 2012-10-01 |   |   | immunosuppressants                                                |

|                                                                                                       |           |   |   |   |   |            |   |                                                                |
|-------------------------------------------------------------------------------------------------------|-----------|---|---|---|---|------------|---|----------------------------------------------------------------|
| Elvitegravir,<br>emtricitabine,<br>tenofovir,<br>cobicistat                                           | Stribild  |   | 1 | 1 |   | 2012-11-26 | 1 | antivirals for systemic<br>use                                 |
| Ivacaftor                                                                                             | Kalydeco  | 1 |   | 1 |   | 2012-11-26 | 1 | other respiratory system<br>products                           |
| Stiripentol                                                                                           | Diacomit  |   | 1 | 1 |   | 2012-12-21 | 1 | antiepileptics                                                 |
| Nebivolol                                                                                             | Bystolic  |   | 1 | 1 |   | 2012-12-21 | 1 | beta blocking agents                                           |
| Ingenol                                                                                               | Picato    |   | 1 | 1 |   | 2013-01-30 | 1 | antibiotics and<br>chemotherapeutics for<br>dermatological use |
| Brentuximab                                                                                           | Adcetris  |   | 1 | 1 | 1 | 2013-02-01 | 1 | antineoplastic agents                                          |
| Meningococcal<br>polysaccharide<br>groups A,C,W-<br>135 & Y<br>conjugate<br>vaccine, Tetanus<br>toxin | Nimenrix  |   | 1 | 1 |   | 2013-03-05 | 1 | vaccines                                                       |
| Mirabegron                                                                                            | Myrbetriq |   | 1 | 1 |   | 2013-03-06 | 1 | urologicals                                                    |
| Regorafenib                                                                                           | Stivarga  |   | 1 |   | 1 | 2013-03-11 | 1 | antineoplastic agents                                          |
| Rotigotine                                                                                            | Neupro    |   | 1 | 1 |   | 2013-03-21 | 1 | anti-parkinson drugs                                           |
| Dimethyl                                                                                              | Tecfidera |   | 1 | 1 |   | 2013-04-03 | 1 | other nervous system                                           |
| Perampanel                                                                                            | Fycompa   |   | 1 | 1 |   | 2013-04-04 | 1 | antiepileptics                                                 |
| Pertuzumab                                                                                            | Perjeta   | 1 |   |   | 1 | 2013-04-12 | 1 | antineoplastic agents                                          |
| Enzalutamide                                                                                          | Xtandi    |   | 1 |   | 1 | 2013-05-29 | 1 | endocrine therapy                                              |
| Ulipristal                                                                                            | Fibristal |   | 1 | 1 |   | 2013-06-24 | 1 | sex hormones and<br>modulators of the genital<br>system        |
| Vismodegib                                                                                            | Erivedge  |   | 1 | 1 |   | 2013-07-12 | 1 | antineoplastic agents                                          |
| Dabrafenib                                                                                            | Tafinlar  |   | 1 | 1 |   | 2013-07-16 | 1 | antineoplastic agents                                          |
| Trametinib                                                                                            | Mekinist  |   | 1 | 1 |   | 2013-07-18 | 1 | antineoplastic agents                                          |

|                                        |                 |   |   |   |   |            |   |                                                                  |
|----------------------------------------|-----------------|---|---|---|---|------------|---|------------------------------------------------------------------|
| Fluticasone and vilatnerol             | Breo ellipta    |   | 1 | 1 |   | 2013-07-23 | 1 | drugs for obstructive airway diseases                            |
| Acidinium                              | Tudorza genuair |   | 1 | 1 |   | 2013-07-29 | 1 | drugs for obstructive airway diseases                            |
| Rifaximin                              | Zaxine          |   | 1 | 1 |   | 2013-08-13 | 1 | antidiarrheals, intestinal antiinflammatory/antiinfective agents |
| Ocriplasmin                            | Jetrea          | 1 |   | 1 |   | 2013-08-13 | 1 | ophthalmologicals                                                |
| Trastuzumab emtansine                  | Kadcyla         |   | 1 | 1 |   | 2013-09-11 | 1 | antineoplastic agents                                            |
| Galsulfase                             | Naglazyme       | 1 |   | 1 |   | 2013-09-16 | 1 | other alimentary tract and metabolism products                   |
| Riociguat                              | Adempas         |   | 1 | 1 |   | 2013-09-19 | 1 | antihypertensives                                                |
| Pasireotide                            | Signifor        | 1 |   | 1 |   | 2013-09-23 | 1 | pituitary and hypothalamic hormones                              |
| Efinaconazole                          | Jublia          |   | 1 | 1 |   | 2013-10-02 | 1 | drugs used in diabetes                                           |
| Romidepsin                             | Istodax         |   | 1 | 1 | 1 | 2013-10-16 | 1 | antineoplastic agents                                            |
| Dolutegravir                           | Tivicay         |   | 1 | 1 |   | 2013-10-31 | 1 | antivirals for systemic use                                      |
| Afatinib                               | Giotrif         |   | 1 | 1 |   | 2013-11-01 | 1 | antineoplastic agents                                            |
| Macitentan                             | Opsumit         |   | 1 | 1 |   | 2013-11-06 | 1 | antihypertensives                                                |
| Aflibercept                            | Eylea           |   | 1 | 1 |   | 2013-11-08 | 1 | antineoplastic agents                                            |
| Teriflunomide                          | Aubagio         |   | 1 | 1 |   | 2013-11-14 | 1 | immunosuppressants                                               |
| Simeprevir                             | Galexos         |   | 1 | 1 |   | 2013-11-18 | 1 | antivirals for systemic use                                      |
| Alogliptin                             | Nesina          |   | 1 | 1 |   | 2013-11-27 | 1 | drugs used in diabetes                                           |
| Linacotide                             | Constella       |   | 1 | 1 |   | 2013-12-02 | 1 | drugs for constipation                                           |
| Multicomponent meningococcal B vaccine | Bexsero         | 1 |   | 1 |   | 2013-12-06 | 1 | vaccines                                                         |
| Radium-223 dichloride                  | Xofigo          |   | 1 | 1 |   | 2013-12-12 | 1 | therapeutic radiopharmaceuticals                                 |

|                                                            |               |   |   |   |            |   |                                                   |
|------------------------------------------------------------|---------------|---|---|---|------------|---|---------------------------------------------------|
| Sofosbuvir                                                 | Sovaldi       | 1 |   | 1 | 2013-12-13 | 1 | antivirals for systemic use                       |
| Umeclidinium and vilanterol                                | Anoro ellipta |   | 1 | 1 | 2013-12-23 | 1 | drugs for obstructive airway diseases             |
| Pomalidomide                                               | Pomalyst      | 1 |   | 1 | 2014-01-20 | 1 | immunosuppressants                                |
| Lomitapide                                                 | Juxtapid      |   | 1 | 1 | 2014-02-04 | 1 | lipid modifying agents                            |
| Aflibercept                                                | Zaltrap       |   | 1 | 1 | 2014-02-12 |   | 1 antineoplastic agents                           |
| Bosutinibs                                                 | Bosulif       |   | 1 | 1 | 2014-03-14 | 1 | 1 antineoplastic agents                           |
| Recombinant human coagulation Factor IX, FC fusion protein | Alprolix      |   | 1 | 1 | 2014-03-20 |   | 1 antihemorrhagics                                |
| Tofacitinib                                                | Xeljanz       |   | 1 | 1 | 2014-04-17 | 1 | immunosuppressants                                |
| Tesamorelin                                                | Egrifta       |   | 1 | 1 | 2014-04-29 | 1 | pituitary and hypothalamic hormones               |
| Canagliflozin                                              | Invokana      |   | 1 | 1 | 2014-05-23 | 1 | drugs used in diabetes                            |
| Taliglucerase Alfa                                         | Elelyso       |   | 1 | 1 | 2014-05-29 |   | 1 other alimentary tract and metabolism products  |
| Eslicarbazepine                                            | Aptiom        |   | 1 | 1 | 2014-07-08 | 1 | antiepileptics                                    |
| Antihemophilic factor, FC fusion protein                   | Eloctate      |   | 1 | 1 | 2014-08-22 |   | 1 antihemorrhagics                                |
| Ledipasvir and sofosbuvir                                  | Harvoni       |   | 1 |   | 2014-10-15 | 1 | antivirals for systemic use                       |
| Vortioxetine                                               | Trintellix    |   | 1 | 1 | 2014-10-22 | 1 | psychoanaleptics                                  |
| Simoctocog alfa                                            | Nuwiq         |   | 1 | 1 | 2014-10-23 |   | 1 antihemorrhagics                                |
| Azelastine and fluticasone conjugated                      | Dymista       |   | 1 | 1 | 2014-10-23 | 1 | nasal preparations                                |
| estrogens and bazedoxifene acetate                         | Duavive       |   | 1 | 1 | 2014-10-23 | 1 | sex hormones and modulators of the genital system |

|                                                             |             |   |   |   |   |            |            |   |                                                |
|-------------------------------------------------------------|-------------|---|---|---|---|------------|------------|---|------------------------------------------------|
| Apremilast                                                  | Otezla      |   | 1 | 1 |   | 2014-11-12 | 1          |   | immunosuppressants                             |
| Ibrutinib                                                   | Imbruvica   | 1 |   |   | 1 | 1          | 2014-11-17 | 1 | antineoplastic agents                          |
| Obinutuzumab                                                | Gazyva      | 1 |   | 1 |   |            | 2014-11-25 |   | 1 antineoplastic agents                        |
| Siltuximab                                                  | Sylvant     |   | 1 |   | 1 |            | 2014-12-03 |   | 1 immunosuppressants                           |
| Dapagliflozin                                               | Forxiga     |   | 1 | 1 |   |            | 2014-12-12 | 1 | drugs used in diabetes                         |
| Ritonavir,<br>paritaprevir,<br>ombitasvir,<br>dasabuvir     | Holkira Pak |   | 1 |   | 1 |            | 2014-12-22 | 1 | antivirals for systemic use                    |
| Sodium<br>phenylbutyrate                                    | Pheburane   |   | 1 |   | 1 |            | 2015-01-26 | 1 | other alimentary tract and metabolism products |
| Vedolizumab                                                 | Entyvio     |   | 1 | 1 |   |            | 2015-01-29 |   | 1 immunosuppressants                           |
| Human<br>papillomavirus 9<br>valent vaccine,<br>recombinant | Gardasil 9  |   | 1 | 1 |   |            | 2015-02-05 |   | 1 vaccines                                     |
| Deferiprone                                                 | Ferriprox   |   | 1 | 1 |   |            | 2015-02-13 | 1 | all other therapeutic products                 |
| Secukinumab                                                 | Cosentyx    |   | 1 | 1 |   |            | 2015-02-27 |   | 1 immunosuppressants                           |
| Tedizolid                                                   | Sivextro    |   | 1 | 1 |   |            | 2015-03-17 | 1 | antibacterials for systemic use                |
| Idelalisib                                                  | Zydelig     |   | 1 | 1 |   | 1          | 2015-03-27 | 1 | antineoplastic agents                          |
| Ceritinib                                                   | Zykadia     |   | 1 | 1 |   | 1          | 2015-03-27 | 1 | antineoplastic agents                          |
| Ponatinib                                                   | Iclusig     |   | 1 | 1 |   | 1          | 2015-04-02 | 1 | antineoplastic agents                          |
| Carglumic Acid                                              | Carbaglu    | 1 |   |   |   | 1          | 2015-04-10 | 1 | other alimentary tract and metabolism products |
| Ivermectin                                                  | Rosiver     |   | 1 | 1 |   |            | 2015-04-22 | 1 | anthelmintics                                  |
| Levomilnacipran                                             | Fetzima     |   | 1 | 1 |   |            | 2015-05-08 | 1 | psychoanaleptics                               |
| Pembrolizumab                                               | Keytruda    |   | 1 | 1 |   | 1          | 2015-05-19 |   | 1 antineoplastic agents                        |
| Naloxegol                                                   | Movantik    |   | 1 | 1 |   |            | 2015-06-02 | 1 | drugs for constipation                         |
| Nintedanib                                                  | Ofev        |   | 1 | 1 |   |            | 2015-06-25 | 1 | antineoplastic agents                          |

|                                                                                           |            |   |   |   |   |            |   |   |                                                         |
|-------------------------------------------------------------------------------------------|------------|---|---|---|---|------------|---|---|---------------------------------------------------------|
| Ramucirumab                                                                               | Cyramza    |   | 1 | 1 |   | 2015-07-16 |   | 1 | antineoplastic agents                                   |
| Empagliflozin                                                                             | Jardiance  |   | 1 | 1 |   | 2015-07-23 | 1 |   | drugs used in diabetes                                  |
| Mifepristone<br>and Misoprostol                                                           | Mifegymiso |   | 1 | 1 |   | 2015-07-29 | 1 |   | sex hormones and<br>modulators of the genital<br>system |
| Daclatasvir                                                                               | Daklinza   |   | 1 | 1 | 1 | 2015-08-13 | 1 |   | antivirals for systemic<br>use                          |
| Asfotase Alfa                                                                             | Strensiq   | 1 |   | 1 | 1 | 2015-08-14 |   | 1 | other alimentary tract<br>and metabolism products       |
| Teduglutide                                                                               | Revestive  |   | 1 |   | 1 | 2015-09-04 |   | 1 | other alimentary tract<br>and metabolism products       |
| Evolocumab                                                                                | Repatha    |   | 1 | 1 |   | 2015-09-10 |   | 1 | lipid modifying agents                                  |
| Nivolumab                                                                                 | Opdivo     | 1 |   |   | 1 | 2015-09-25 |   | 1 | antineoplastic agents                                   |
| Ceftolozane<br>Sulfate and<br>Tazobactam<br>Sodium                                        | Zerbaxa    |   | 1 | 1 |   | 2015-09-30 | 1 |   | antibacterials for<br>systemic use                      |
| Sacubitril,<br>Valsartan                                                                  | Entresto   | 1 |   |   | 1 | 2015-10-02 | 1 |   | agents acting on the<br>renin-angiotensin system        |
| Dulaglutide                                                                               | Trulicity  |   | 1 | 1 |   | 2015-11-10 |   | 1 | drugs used in diabetes                                  |
| Elvitegravir,<br>Cobicistat,<br>Emtricitabine,<br>Tenofovir<br>Alafenamide<br>Emriflumate | Genvoya    |   | 1 | 1 |   | 2015-11-27 | 1 |   | antivirals for systemic<br>use                          |
| Mepolizumab                                                                               | Nucala     |   | 1 | 1 |   | 2015-12-03 |   | 1 | drugs for obstructive<br>airway diseases                |
| Lenvatinib                                                                                | Lenvima    |   | 1 | 1 |   | 2015-12-22 | 1 |   | antineoplastic agents                                   |
| Blinatumomab                                                                              | Blinicyto  |   | 1 | 1 | 1 | 2015-12-22 |   | 1 | antineoplastic agents                                   |
| Carfilzomib                                                                               | Kyprolis   |   | 1 |   | 1 | 2016-01-15 | 1 |   | antineoplastic agents                                   |



|                             |                |   |   |   |   |            |   |                                                |
|-----------------------------|----------------|---|---|---|---|------------|---|------------------------------------------------|
| Elbasvir,<br>Grazoprevir    | Zepatier       |   | 1 | 1 |   | 2016-01-19 | 1 | antivirals for systemic use                    |
| Selexipag                   | Uptravi        |   | 1 | 1 |   | 2016-01-20 | 1 | antithrombotic agents                          |
| Ivacaftor,<br>Lumacaftor    | Orkambi        |   | 1 | 1 |   | 2016-01-26 | 1 | other respiratory system products              |
| Sugammadex                  | Bridion        |   | 1 | 1 |   | 2016-02-05 | 1 | all other therapeutic products                 |
| Cobimetinib                 | Cotellic       |   | 1 | 1 |   | 2016-02-22 | 1 | antineoplastic agents                          |
| Brivaracetam                | Brivlera       |   | 1 | 1 |   | 2016-03-09 | 1 | antiepileptics                                 |
| Asunaprevir                 | Sunvepra       |   | 1 | 1 |   | 2016-03-09 | 1 | antivirals for systemic use                    |
| Palbociclib                 | Ibrance        |   | 1 | 1 | 1 | 2016-03-16 | 1 | antineoplastic agents                          |
| Alirocumab                  | Praluent       |   | 1 | 1 |   | 2016-04-11 |   | 1 lipid modifying agents                       |
| Bilastine                   | Blexten        |   | 1 | 1 |   | 2016-04-21 | 1 | antihistamines for systemic use                |
| Idarucizumab                | Praxbind       |   | 1 | 1 | 1 | 2016-04-29 |   | 1 all other therapeutic products               |
| Olaparib                    | Lynparza       |   | 1 | 1 | 1 | 2016-04-29 | 1 | antineoplastic agents                          |
| Ixekizumab                  | Taltz          |   | 1 | 1 |   | 2016-05-25 |   | 1 immunosuppressants                           |
| Osimertinib                 | Tagrisso       |   | 1 | 1 | 1 | 2016-07-05 | 1 | antineoplastic agents                          |
| Sofosbuvir +<br>Velpatasvir | Epclusa        |   | 1 | 1 |   | 2016-07-11 | 1 | antivirals for systemic use                    |
| Ixazomib                    | Ninlaro        |   | 1 | 1 |   | 2016-08-04 | 1 | antineoplastic agents                          |
| Nitisinone                  | MDK-Nitisinone | 1 |   | 1 |   | 2016-09-20 | 1 | other alimentary tract and metabolism products |
| Venetoclax                  | Venclexta      |   | 1 | 1 | 1 | 2016-09-30 | 1 | antineoplastic agents                          |
| Edoxaban                    | Lixiana        |   | 1 | 1 |   | 2016-11-04 | 1 | antithrombotic agents                          |
| Nitisinone                  | Nitisinone     | 1 |   | 1 |   | 2016-11-04 | 1 | other alimentary tract and metabolism products |
| Daclizumab beta             | Zinbryta       |   | 1 | 1 |   | 2016-12-08 |   | 1 immunosuppressants                           |

|            |         |    |     |     |     |            |   |     |                                                |
|------------|---------|----|-----|-----|-----|------------|---|-----|------------------------------------------------|
| Nitisinone | Orfadin | 1  |     | 1   |     | 2016-12-13 | 1 |     | other alimentary tract and metabolism products |
| Ivabradine | Lancora |    | 1   | 1   |     | 2016-12-23 | 1 |     | cardiac therapy                                |
|            |         | 55 | 454 | 379 | 130 |            |   | 286 | 99                                             |

**\*Prescrire evaluations as of February 20, 2018; PMPRB evaluations as of December 31, 2016; Prescrire ratings - offers an advantage, possibly helpful, nothing new, not acceptable; PMPRB ratings - category 3 = moderate, little or no improvement (prior to 2010), slight or no improvement, moderate improvement - primary, moderate improvement - secondary (2010 onwards)**
