# Supplementary material for: Health Canada’s use of expedited review pathways and therapeutic innovation, 1995–2016: cross-sectional analysis
Source: PubMed Central journal article supplement — BMJ Open. 2018 Aug 30;8(8):e023605. doi: 10.1136/bmjopen-2018-023605 (PMC6119438; doi:10.1136/bmjopen-2018-023605), 2018-08-30
Supplement: bmjopen-2018-023605supp002.pdf [file bmjopen-2018-023605supp002.pdf]

**Supplementary Table 2: All drugs approved between 1995-2016 that did not receive therapeutic assessments**

| Generic name                                | Brand name   | Review status |          |                                      | Notice of compliance or<br>Notice of compliance with conditions date | Small molecule | Biologic | ATC group (second level)                          |
|---------------------------------------------|--------------|---------------|----------|--------------------------------------|----------------------------------------------------------------------|----------------|----------|---------------------------------------------------|
|                                             |              | Standard      | Priority | Notice of compliance with conditions |                                                                      |                |          |                                                   |
| Levocarnitine                               | Carnitor     |               | 1        |                                      | 1995-01-19                                                           |                |          | other alimentary tract and metabolism products    |
| Losoxantrone                                | Bianda       | 1             |          |                                      | 1995-02-19                                                           |                |          | antineoplastic agents                             |
| Carvedilol                                  | Dilatrend    | 1             |          |                                      | 1995-02-27                                                           |                |          | beta blocking agents                              |
| Carvedilol                                  | Kredex       | 1             |          |                                      | 1995-02-27                                                           |                |          | beta blocking agents                              |
| Halofantrine                                | Halfan       | 1             |          |                                      | 1995-03-29                                                           |                |          | antiprotozoals                                    |
| Ceftibuten                                  | Cedax        | 1             |          |                                      | 1995-05-09                                                           |                |          | antibacterials for systemic use                   |
| Sermorelin                                  | Geref        | 1             |          |                                      | 1995-06-08                                                           |                |          | pituitary and hypothalamic hormones and analogues |
| Tetrabenazine                               | Nitoman      | 1             |          |                                      | 1995-12-29                                                           |                |          | other nervous system drugs                        |
| Iron dextran                                | Dexferrum    |               | 1        |                                      | 1996-01-09                                                           |                |          | antianemic preparations                           |
| Rimexolone                                  | Vexol        | 1             |          |                                      | 1996-01-17                                                           |                |          | corticosteroids for systemic use                  |
| Measles virus vaccine/Rubella virus vaccine | Moru-Viraten |               | 1        |                                      | 1996-02-26                                                           |                |          | vaccines                                          |
| Ferumoxsil                                  | Gastromark   | 1             |          |                                      | 1996-03-15                                                           |                |          | contrast media                                    |
| Saquinavir                                  | Saquinavir   |               | 1        |                                      | 1996-03-22                                                           |                |          | antivirals for systemic use                       |
| Pantoprazole                                | Panto-Byk    | 1             |          |                                      | 1996-07-05                                                           |                |          | drugs for acid related disorders                  |
| Dexfenfluramine                             | Redux        | 1             |          |                                      | 1996-07-29                                                           |                |          | antiobesity preparations                          |
| Palmitic acid/Galactose                     | Levovist     | 1             |          |                                      | 1996-07-31                                                           |                |          | contrast media                                    |
| Fleroxacin                                  | Megalone     | 1             |          |                                      | 1996-08-21                                                           |                |          | antibacterials for systemic use                   |

|                                                          |                                    |   |   |            |                                                   |
|----------------------------------------------------------|------------------------------------|---|---|------------|---------------------------------------------------|
| Reviparin                                                | Clivarine                          | 1 |   | 1996-09-10 | antithrombotic agents                             |
| Diphtheria, tetanus & acellular pertussis vaccine        | Infanrix                           |   | 1 | 1996-12-17 | vaccines                                          |
| Cisatracurium                                            | Nimbex injectior                   | 1 |   | 1996-12-18 | muscle relaxants                                  |
| Remifentanil                                             | Ultiva injection                   | 1 |   | 1996-12-24 | anesthetics                                       |
| Tiludronate                                              | Skelid                             | 1 |   | 1997-02-06 | drugs for treatment of bone disease               |
| Tazarotene                                               | Tazorac Gel                        | 1 |   | 1997-02-25 | antipsoriatics                                    |
| Praziquantel                                             | Biltricide                         | 1 |   | 1997-03-07 | anthelmintics                                     |
| Molgramostim                                             | Leucomax                           |   | 1 | 1997-03-10 | immunostimulants                                  |
| Fosphenytoin                                             | Cerebyx injection                  | 1 |   | 1997-03-20 | antiepileptics                                    |
| Butenafine                                               | Dr. Scholl's athlete's foot powder | 1 |   | 1997-04-15 | antifungals for dermatological use                |
| Troglitazone                                             | Rezulin                            |   | 1 | 1997-05-09 | drugs used in diabetes                            |
| Trandolapril                                             | Odrik                              | 1 |   | 1997-05-15 | agents acting on the renin-angiotensin system     |
| Follitropin alpha                                        | Gonal-F                            | 1 |   | 1997-06-06 | sex hormones and modulators of the genital system |
| Kit for preparation of indium in 111 imciromab pentetate | Myoscint                           | 1 |   | 1997-07-02 | diagnostic radiopharmaceuticals                   |
| Cytomegalovirus immune globulin                          | Cytogam                            | 1 |   | 1997-08-01 | immune sera and immunoglobulins                   |
| Oxiconazole                                              | Oxizole                            | 1 |   | 1997-08-08 | antifungals for dermatological use                |
| Respiratory syncytial virus immune globulin              | Respigam                           |   | 1 | 1997-08-20 | immune sera and immunoglobulins                   |
| Arcitumomab                                              | CEA-Scan                           | 1 |   | 1997-09-16 | diagnostic radiopharmaceuticals                   |

|                                       |                   |   |   |            |   |                                   |
|---------------------------------------|-------------------|---|---|------------|---|-----------------------------------|
| Olopatadine                           | Patanol           | 1 |   | 1997-09-16 |   | ophthalmologicals                 |
| Pegaspargase                          | Oncaspar          | 1 |   | 1997-11-19 |   | antineoplastic agents             |
| Anagrelide as hydrochloride           | Agrylin           |   | 1 | 1997-11-19 |   | antineoplastic agents             |
| Nadroparin                            | Fraxiparine       | 1 |   | 1997-11-27 |   | antithrombotic agents             |
| Bicisate                              | OncoScint         | 1 |   | 1998-01-16 |   | diagnostic radiopharmaceuticals   |
| Gadolinium (III)                      | Gadolite          | 1 |   | 1998-04-08 |   | contrast media                    |
| Lexidronam                            | Quadramet         | 1 |   | 1998-06-22 |   | therapeutic radiopharmaceuticals  |
| Miglitol                              | Glyset            | 1 |   | 1998-07-22 |   | drugs used in diabetes            |
| Lipoprotein-OspA antigen recombinant  | Lymerix           |   | 1 | 1998-12-02 |   | vaccines                          |
| Toremifene                            | Fareston          | 1 |   | 1998-12-14 |   | endocrine therapy                 |
| Cefdinir                              | Omnicef           | 1 |   | 1999-02-05 |   | antibacterials for systemic use   |
| Methacholine                          | Methacoline       | 1 |   | 1999-02-25 |   | diagnostic agents                 |
| Fosfomicin                            | Monurol           | 1 |   | 1999-04-12 |   | antibacterials for systemic use   |
| Alitretinoin                          | Panretin          |   | 1 | 1999-06-11 |   | other dermatological preparations |
| Ioxilan                               | Oxilan            | 1 |   | 1999-10-05 |   | contrast media                    |
| Mangafodipir                          | Teslascan         | 1 |   | 2000-02-09 | 1 | contrast media                    |
| Sevelamer                             | Renagel           | 1 |   | 2000-02-24 | 1 | all other therapeutic products    |
| Valrubicin                            | Valstar           |   | 1 | 2000-07-04 | 1 | antineoplastic agents             |
| Ibutilide                             | Corvert injection | 1 |   | 2000-07-14 | 1 | cardiac therapy                   |
| Fomepizole                            | Antizol           |   | 1 | 2000-11-30 | 1 | all other therapeutic products    |
| Amlexanox                             | Apthera           | 1 |   | 2000-12-11 | 1 | stomatological preparations       |
| Tegafur/uracil and leucovorin calcium | Orzel             | 1 |   | 2001-04-06 | 1 | antineoplastic agents             |
| Argatroban                            | Argatroban        |   | 1 | 2001-06-04 | 1 | antithrombotic agents             |

|                         |               |   |   |            |   |                                                          |
|-------------------------|---------------|---|---|------------|---|----------------------------------------------------------|
| Aminolevulinic acid     | Levulan       | 1 |   | 2001-06-20 | 1 | antineoplastic agents                                    |
| Infliximab              | Remicade      |   | 1 | 2001-09-27 |   | 1 immunosuppressants                                     |
| Levobupivacaine         | Chirocaine    | 1 |   | 2002-03-20 | 1 | anesthetics                                              |
| Unoprostone isopropyl   | Rescula       | 1 |   | 2002-04-03 | 1 | ophthalmologicals                                        |
| Thyrotropin             | Thyrogen      | 1 |   | 2002-05-31 |   | 1 diagnostic agents                                      |
| Anti-thymocyte globulin | Thymoglobulin | 1 |   | 2002-11-20 |   | 1 immunosuppressants                                     |
| Dextromethylphenidate   | Attenade      | 1 |   | 2003-08-12 | 1 | psychoanaleptics                                         |
| Sulfur Hexafluoride     | Sonovue       | 1 |   | 2004-02-12 | 1 | contrast media                                           |
| Yttrium-90              | Yttrium-90    |   | 1 | 2004-12-02 |   | 1 therapeutic radiopharmaceuticals                       |
| Choriogonadotropin Alfa | Ovidrel       | 1 |   | 2004-12-16 |   | 1 sex hormones and modulators of the genital system      |
| Sulesomab               | Leukoscan     | 1 |   | 2005-01-17 |   | 1 diagnostic radiopharmaceuticals                        |
| Tositumomab             | Bexxar        |   | 1 | 2005-08-18 |   | 1 therapeutic radiopharmaceuticals                       |
| Nitric oxide            | Inomax        |   | 1 | 2005-09-23 | 1 | other respiratory system products                        |
| F-Fluorodeoxyglucose    | Cantrace      |   | 1 | 2006-07-27 |   | 1 diagnostic radiopharmaceuticals                        |
| Lumiracoxib             | Prexige       | 1 |   | 2006-11-02 | 1 | antiinflammatory and antirheumatic products              |
| Nelarabine              | Atriance      |   | 1 | 2007-09-22 | 1 | antineoplastic agents                                    |
| Rotavirus vaccine       | Rotarix       | 1 |   | 2007-10-09 |   | 1 vaccines                                               |
| Retapamulin             | Altargo       | 1 |   | 2008-03-19 | 1 | antibiotics and chemotherapeutics for dermatological use |

|                                      |                   |   |   |            |  |   |                                                   |
|--------------------------------------|-------------------|---|---|------------|--|---|---------------------------------------------------|
| Methoxy                              | Mircera           | 1 |   | 2008-03-31 |  | 1 | antianemic preparations                           |
| Polyethylene glycol-<br>epoetin beta |                   |   |   |            |  |   |                                                   |
| Telavancin                           | Vibativ           | 1 |   | 2009-09-29 |  | 1 | antibacterials for systemic use                   |
| Human C1 esterase<br>inhibitor       | Berinert          | 1 |   | 2010-05-31 |  | 1 | other hematological agents                        |
| Influenza vaccine                    | Flumist           | 1 |   | 2010-06-22 |  | 1 | vaccines                                          |
| Zucapsaicin                          | Civanex (Zuacta   | 1 |   | 2010-07-15 |  | 1 | topical products for joint and<br>muscular pain   |
| Clevidipine                          | Cleviprex         | 1 |   | 2011-04-15 |  | 1 | calcium channel blockers                          |
| Rubidium chloride rb<br>82           | Ruby-fill         |   | 1 | 2011-09-20 |  | 1 | diagnostic radiopharmaceuticals                   |
| Doxycycline                          | Efracea           | 1 |   | 2011-11-14 |  | 1 | antibacterials for systemic use                   |
| Ferumoxytol                          | Feraheme          | 1 |   | 2011-12-08 |  | 1 | antianemic preparations                           |
| Remestemcel-L                        | Prochymal         |   | 1 | 2012-05-17 |  | 1 | unassigned                                        |
| Ezogabine                            | Potiga            | 1 |   | 2012-10-08 |  | 1 | antiepileptics                                    |
| Haemagglutinin-<br>Strain A          | Arepranrix H5N1   | 1 |   | 2013-02-13 |  | 1 | vaccines                                          |
| Olodaterol                           | Striverdi respim: | 1 |   | 2013-06-11 |  | 1 | drugs for obstructive airway<br>diseases          |
| Difluprednate                        | Durezol           | 1 |   | 2013-11-04 |  | 1 | corticosteroids, dermatological<br>preparations   |
| Tafluprost                           | Saflutan          | 1 |   | 2014-05-26 |  | 1 | ophthalmologicals                                 |
| Elosulfase Alfa                      | Vimizim           |   | 1 | 2014-07-02 |  | 1 | other alimentary tract and<br>metabolism products |
| Turoctocog alfa                      | Zonovate          | 1 |   | 2014-12-08 |  | 1 | antihemorrhagics                                  |
| Bromfenac                            | Prolensa          | 1 |   | 2015-03-26 |  | 1 | ophthalmologicals                                 |
| Albiglutide                          | Eperzan           | 1 |   | 2015-07-15 |  | 1 | drugs used in diabetes                            |
| Vilazodone                           | Viibryd           | 1 |   | 2015-07-16 |  | 1 | psychoanaleptics                                  |
| Polidocanol                          | Varithena         | 1 |   | 2015-08-04 |  | 1 | vasoprotectives                                   |
| Peginterferon Beta-<br>1A            | Plegridy          | 1 |   | 2015-08-10 |  | 1 | immunostimulants                                  |

|                                                      |            |   |   |            |   |   |                                                |
|------------------------------------------------------|------------|---|---|------------|---|---|------------------------------------------------|
| Antihemophilic Factor (Recombinant) Porcine Sequence | Obizur     | 1 |   | 2015-10-14 |   | 1 | antihemorrhagics                               |
| Lubiprostone                                         | Amitiza    | 1 |   | 2015-10-14 | 1 |   | drugs for constipation                         |
| Albutrepenonacog Alfa                                | Idelvion   | 1 |   | 2016-01-26 |   | 1 | antihemorrhagics                               |
| Finaxofacin                                          | Xtoro      | 1 |   | 2016-03-11 | 1 |   | otologicals                                    |
| Glycerol                                             | Ravicti    |   | 1 | 2016-03-16 | 1 |   | other alimentary tract and metabolism products |
| Phenylbutyrate                                       |            |   |   |            |   |   |                                                |
| Vorapaxar                                            | Zontivity  | 1 |   | 2016-05-13 | 1 |   | antithrombotic agents                          |
| Elotuzumab                                           | Empliciti  |   | 1 | 2016-06-21 |   | 1 | antineoplastic agents                          |
| Daratumumab                                          | Darzalex   |   | 1 | 2016-06-29 |   | 1 | antineoplastic agents                          |
| Rupatadine                                           | Rupall     | 1 |   | 2016-07-20 | 1 |   | antihistamines for systemic use                |
| Reslizumab                                           | Cinqair    | 1 |   | 2016-07-20 |   | 1 | drugs for obstructive airway diseases          |
| Bepotastine                                          | Bepreve    | 1 |   | 2016-07-27 | 1 |   | antihistamines for systemic use                |
| Alectinib                                            | Alecensaro |   | 1 | 2016-09-29 | 1 |   | antineoplastic agents                          |
| Antihemophilic Factor (Recombinant), PFGvlated       | Adynovate  | 1 |   | 2016-11-17 |   | 1 | antihemorrhagics                               |
| Gadoterate                                           | Dotarem    | 1 |   | 2016-11-25 | 1 |   | contrast media                                 |
| Meglumine                                            |            |   |   |            |   |   |                                                |
| Botulinium antitoxin serotypes A, B,C, D, E, F and G | BAT        | 1 |   | 2016-12-08 |   | 1 | immune sera and immunoglobulins                |
| Lonococog Alfa                                       | Afstyla    | 1 |   | 2016-12-12 |   | 1 | antihemorrhagics                               |
